# Supplementary material for: Genomic Signatures of SARS-CoV-2 Associated with Patient Mortality
Source: MDPI journal article supplement (doi:10.3390/v13020227), 2021-02-02
Supplement: s1 [file s1]

**Supplementary Table 3. Mortality rates among demographic and geographic parameters**

|                   |               | <b>Mortality rate<br/>(% [95%CI])</b> | <b>n/N</b> |
|-------------------|---------------|---------------------------------------|------------|
| <b>Global</b>     |               | 5.74 [4.89-6.72]                      | 144/2508   |
| <b>Sex*</b>       | Male          | 6.85 [5.61-8.34]                      | 90/1314    |
|                   | Female        | 5.41 [4.17-6.99]                      | 54/999     |
| <b>Geography*</b> | Africa        | 0.93 [0.22-5.10]                      | 1/107      |
|                   | Asia          | 4.51 [3.50-5.80]                      | 57/1264    |
|                   | Europe        | 3.84 [2.65-5.52]                      | 27/704     |
|                   | North America | 9.70 [7.28-15.61]                     | 23/214     |
|                   | South America | 19.89 [14.73-26.31]                   | 36/181     |
| <b>Time*</b>      | Dec 2019      | 0 [0.32-36.94]                        | 0/7        |
|                   | Jan 2020      | 0 [0.02-2.86]                         | 0/126      |
|                   | Feb 2020      | 0.43 [0.11-2.39]                      | 1/230      |
|                   | Mar 2020      | 4.36 [3.22-5.89]                      | 40/917     |
|                   | Apr 2020      | 11.44 [9.20-14.15]                    | 73/638     |
|                   | May 2020      | 4.88 [2.69-8.75]                      | 10/205     |
|                   | Jun 2020      | 10.87 [6.72-17.17]                    | 15/138     |

\*Statistically significant differences in mortality rate according to geography ( $X^2=61.26$ , d.f.=4,  $P<0.0001$ ) and time of year ( $X^2=74.35$ , d.f.=6,  $P<0.0001$ ), but not sex ( $X^2=2.37$ , d.f.=1,  $P=0.12$ ). n: number of deceased, N: total number of patients.
