# Supplementary material for: Genomic Signatures of SARS-CoV-2 Associated with Patient Mortality
Source: MDPI journal article supplement (doi:10.3390/v13020227), 2021-02-02
Supplement: s1 [file s1]

**Supplementary Table 5. Parameter estimates of the Generalized Linear Model (GLM) for patient mortality in the validation cohort**

| Term          | Estimate | Std Error | X <sup>2</sup> | P value | Lower CL | Upper CL |
|---------------|----------|-----------|----------------|---------|----------|----------|
| Intercept     | -7.202   | 0.998     | 104.49         | <.0001* | -9.5893  | -5.353   |
| Africa        | -2.850   | 1.069     | 16.42          | <.0001* | -6.735   | -1.210   |
| Asia          | 0.467    | 0.430     | 3.08           | 0.0792  | -0.354   | 1.596    |
| Europe        | 0.333    | 0.434     | 2.38           | 0.1231  | -0.496   | 1.452    |
| North America | 1.668    | 0.576     | 10.03          | 0.0015* | 0.561    | 2.977    |
| Jan           | 2.541    | 1.937     | 0              | 1.0000  | -2.047   | 7.138    |
| Feb           | 0.098    | 1.517     | 0              | 1.0000  | -4.174   | 2.327    |
| Mar           | -1.609   | 0.689     | 1.96           | 0.1611  | -3.026   | -0.248   |
| Apr           | 0.478    | 0.564     | 1.84           | 0.1746  | -0.627   | 1.662    |
| May           | -0.868   | 0.602     | 1.95           | 0.1625  | -2.059   | 0.361    |
| Jun           | -0.594   | 0.568     | 1.81           | 0.1784  | -1.698   | 0.599    |
| Age           | 0.054    | 0.011     | 36.10          | <.0001* | 0.032    | 0.0776   |
| A23349        | -1.359   | 0.782     | 4.77           | 0.0289* | -3.857   | 0.002    |
| C14353        | -0.088   | 0.357     | 2.21           | 0.1368  | -0.927   | 0.541    |
| CA28827-8     | -0.637   | 0.263     | 8.60           | 0.0034* | -1.211   | -0.112   |

\*Statistically significant P values. Std Error: standard error. CL: 95% confidence interval of estimates. The overall model had a  $X^2=55.51$ ,  $P<0.0001$ . AICc=247.06, with effect tests for geographic region ( $X^2=29.78$ , d.f.=4,  $P<0.0001$ ), time of year ( $X^2=14.45$ , d.f.=6,  $P=0.025$ ), age ( $X^2=36.10$ , d.f.=1,  $P<0.0001$ ), A/G23349 ( $X^2=4.77$ , d.f.=2,  $P=0.0289$ ), C/T14353 ( $X^2=2.21$ , d.f.=1,  $P<0.136$ ), and CA/GG28827-8 ( $X^2=8.59$ , d.f.=1,  $P=0.0034$ ).
