# Supplementary material for: Genomic Signatures of SARS-CoV-2 Associated with Patient Mortality
Source: MDPI journal article supplement (doi:10.3390/v13020227), 2021-02-02
Supplement: s1 [file s1]

**Supplementary Table 4. Parameter estimates of Generalized Linear Model (GLM) for patient mortality**

| Term          | Estimate | Std Error | X <sup>2</sup> | P value | Lower CL | Upper CL |
|---------------|----------|-----------|----------------|---------|----------|----------|
| Intercept     | -6.106   | 0.521     | 279.32         | <.0001* | -7.243   | -5.156   |
| Africa        | -1.134   | 0.676     | 6.02           | 0.014*  | -2.898   | -0.040   |
| Asia          | 0.121    | 0.229     | 3.34           | 0.067   | -0.303   | 0.639    |
| Europe        | -0.544   | 0.261     | 5.33           | 0.021*  | -1.046   | 0.020    |
| North America | 0.246    | 0.290     | 3.25           | 0.072   | -0.315   | 0.853    |
| Jan           | -1.776   | 1.260     | 2.08           | 0.149   | -5.948   | 0.048    |
| Feb           | -1.473   | 0.775     | 2.08           | 0.149   | -3.407   | -0.103   |
| Mar           | -0.133   | 0.383     | 1.80           | 0.179   | -0.795   | 0.783    |
| Apr           | 0.818    | 0.376     | 9.07           | 0.003*  | 0.175    | 1.725    |
| May           | 0.352    | 0.447     | 2.36           | 0.124   | -0.484   | 1.345    |
| Jun           | 1.098    | 0.438     | 9.24           | 0.002*  | 0.300    | 2.083    |
| Female Sex    | -0.190   | 0.098     | 8.40           | 0.004*  | -0.388   | 0.003    |
| Age           | 0.053    | 0.006     | 115.46         | <.0001* | 0.042    | 0.065    |
| Clade 2       | -0.009   | 0.176     | 3.48           | 0.062   | -0.365   | 0.335    |
| Clade 3       | 0.571    | 0.169     | 14.33          | 0.0002* | 0.236    | 0.902    |
| Clade 4       | -0.253   | 0.171     | 5.78           | 0.016*  | -0.597   | 0.081    |

\*Statistically significant P values. Std Error: standard error. CL: 95% confidence interval of estimates. The overall model had a X<sup>2</sup>=180.49, P<0.0001, AICc=809.1, with significant effect tests for geographic region (X<sup>2</sup>=48.82, d.f.=4, P<0.0001), time of year (X<sup>2</sup>=42.39, d.f.=6, P<0.0001, sex (X<sup>2</sup>=9.40, d.f.=1, P=0.004), age (X<sup>2</sup>=115.46, d.f.=1, P<0.0001) and viral Clades (X<sup>2</sup>=22.77, d.f.=3, P<0001).
