# Supplementary material for: Genomic Signatures of SARS-CoV-2 Associated with Patient Mortality
Source: MDPI journal article supplement (doi:10.3390/v13020227), 2021-02-02
Supplement: s1 [file s1]

We gratefully acknowledge the authors, originating and submitting laboratories of the sequences from GISAID's EpiFlu™ Database on which this research is based. The list is detailed below. All submitters of data may be contacted directly via [www.gisaid.org](https://www.gisaid.org)

| Accession ID   | Virus name                       | Location                                      | Collection date | Originating lab                                                                                                                                                                                                               | Submitting lab                                                                                                                                                                                                                                  | Authors                                                                                                                                                                                                                                                                                                                                                                                   |
|----------------|----------------------------------|-----------------------------------------------|-----------------|-------------------------------------------------------------------------------------------------------------------------------------------------------------------------------------------------------------------------------|-------------------------------------------------------------------------------------------------------------------------------------------------------------------------------------------------------------------------------------------------|-------------------------------------------------------------------------------------------------------------------------------------------------------------------------------------------------------------------------------------------------------------------------------------------------------------------------------------------------------------------------------------------|
| EPI_ISL_402124 | hCoV-19/Wuhan/WV04/2019          | Asia / China / Hubei / Wuhan                  | 2019-12-30      | Wuhan Jinyintan Hospital                                                                                                                                                                                                      | Wuhan Institute of Virology, Chinese Academy of Sciences                                                                                                                                                                                        | Peng Zhou, Xing-Lou Yang, Ding Yu Zhang, Lei Zhang, Yan Zhu, Hao-Rui Si, Zhengli Shi                                                                                                                                                                                                                                                                                                      |
| EPI_ISL_402126 | hCoV-19/Kanagawa/2020            | Asia / Japan / Kanagawa                       | 2020-01-14      | Dept. of Virology III, National Institute of Infectious Diseases                                                                                                                                                              | Wuhan Institute of Virology, Chinese Academy of Sciences                                                                                                                                                                                        | Nagasaki No, Kazuya Shirato, Shukuko Matsuyama, Makoto Takeda                                                                                                                                                                                                                                                                                                                             |
| EPI_ISL_402127 | hCoV-19/Wuhan/WV02/2019          | Asia / China / Hubei / Wuhan                  | 2019-12-30      | Wuhan Jinyintan Hospital                                                                                                                                                                                                      | Wuhan Institute of Virology, Chinese Academy of Sciences                                                                                                                                                                                        | Peng Zhou, Xing-Lou Yang, Ding Yu Zhang, Lei Zhang, Yan Zhu, Hao-Rui Si, Zhengli Shi                                                                                                                                                                                                                                                                                                      |
| EPI_ISL_402128 | hCoV-19/Wuhan/WV05/2019          | Asia / China / Hubei / Wuhan                  | 2019-12-30      | Wuhan Jinyintan Hospital                                                                                                                                                                                                      | Wuhan Institute of Virology, Chinese Academy of Sciences                                                                                                                                                                                        | Peng Zhou, Xing-Lou Yang, Ding Yu Zhang, Lei Zhang, Yan Zhu, Hao-Rui Si, Zhengli Shi                                                                                                                                                                                                                                                                                                      |
| EPI_ISL_402129 | hCoV-19/Wuhan/WV06/2019          | Asia / China / Hubei / Wuhan                  | 2019-12-30      | Wuhan Jinyintan Hospital                                                                                                                                                                                                      | Wuhan Institute of Virology, Chinese Academy of Sciences                                                                                                                                                                                        | Peng Zhou, Xing-Lou Yang, Ding Yu Zhang, Lei Zhang, Yan Zhu, Hao-Rui Si, Zhengli Shi                                                                                                                                                                                                                                                                                                      |
| EPI_ISL_402130 | hCoV-19/Wuhan/WV07/2019          | Asia / China / Hubei / Wuhan                  | 2019-12-30      | Wuhan Jinyintan Hospital                                                                                                                                                                                                      | Wuhan Institute of Virology, Chinese Academy of Sciences                                                                                                                                                                                        | Peng Zhou, Xing-Lou Yang, Ding Yu Zhang, Lei Zhang, Yan Zhu, Hao-Rui Si, Zhengli Shi                                                                                                                                                                                                                                                                                                      |
| EPI_ISL_402132 | hCoV-19/Wuhan/HBCCD-HB-01/2019   | Asia / China / Hubei / Wuhan                  | 2019-12-30      | Wuhan Jinyintan Hospital                                                                                                                                                                                                      | Hubei Provincial Center for Disease Control and Prevention                                                                                                                                                                                      | Bin Fang, Xiang Li, Xiao Yu, Linlin Lu, Bo Yang, Faxian Zhan, Guojun Ye, Xiaohang Huo, Junqiang Xu, Bo Yu, Kun Cai, Jing Li, Yongzhong Jiang                                                                                                                                                                                                                                              |
| EPI_ISL_406592 | hCoV-19/Shenzhen/SZTH-01/2020    | Asia / China / Guangdong / Shenzhen           | 2020-01-13      | Shenzhen Third People's Hospital                                                                                                                                                                                              | Shenzhen Key Laboratory of Pathogen and Immunity, National Clinical Research Center for Infectious Disease, Shenzhen Third People's Hospital                                                                                                    | Yang Yang, Chengqiang Shen, Li Xing, Zhixiang Xu, Haxia Zheng, Yingxia Liu                                                                                                                                                                                                                                                                                                                |
| EPI_ISL_406593 | hCoV-19/Shenzhen/SZTH-002/2020   | Asia / China / Guangdong / Shenzhen           | 2020-01-13      | Shenzhen Key Laboratory of Pathogen and Immunity, National Clinical Research Center for Infectious Disease, Shenzhen Third People's Hospital                                                                                  | Shenzhen Key Laboratory of Pathogen and Immunity, National Clinical Research Center for Infectious Disease, Shenzhen Third People's Hospital                                                                                                    | Yang Yang, Chengqiang Shen, Li Xing, Zhixiang Xu, Haxia Zheng, Yingxia Liu                                                                                                                                                                                                                                                                                                                |
| EPI_ISL_406594 | hCoV-19/Shenzhen/SZTH-003/2020   | Asia / China / Guangdong / Shenzhen           | 2020-01-16      | Shenzhen Key Laboratory of Pathogen and Immunity, National Clinical Research Center for Infectious Disease, Shenzhen Third People's Hospital                                                                                  | Shenzhen Key Laboratory of Pathogen and Immunity, National Clinical Research Center for Infectious Disease, Shenzhen Third People's Hospital                                                                                                    | Yang Yang, Chengqiang Shen, Li Xing, Zhixiang Xu, Haxia Zheng, Yingxia Liu                                                                                                                                                                                                                                                                                                                |
| EPI_ISL_406595 | hCoV-19/Shenzhen/SZTH-004/2020   | Asia / China / Guangdong / Shenzhen           | 2020-01-16      | Shenzhen Key Laboratory of Pathogen and Immunity, National Clinical Research Center for Infectious Disease, Shenzhen Third People's Hospital                                                                                  | Shenzhen Key Laboratory of Pathogen and Immunity, National Clinical Research Center for Infectious Disease, Shenzhen Third People's Hospital                                                                                                    | Yang Yang, Chengqiang Shen, Li Xing, Zhixiang Xu, Haxia Zheng, Yingxia Liu                                                                                                                                                                                                                                                                                                                |
| EPI_ISL_407893 | hCoV-19/Australia/NSW10/2020     | Oceania / Australia / New South Wales         | 2020-01-24      | Centre for Infectious Diseases and Microbiology Laboratory Services                                                                                                                                                           | NSW Health Pathology - Institute of Clinical Pathology and Medical Research, Westmead Hospital, University of Sydney                                                                                                                            | Yang Yang, Chengqiang Shen, Li Xing, Zhixiang Xu, Haxia Zheng, Yingxia Liu                                                                                                                                                                                                                                                                                                                |
| EPI_ISL_407896 | hCoV-19/Australia/QD02/2020      | Oceania / Australia / Queensland / Gold Coast | 2020-01-30      | Pathology Queensland                                                                                                                                                                                                          | Public Health Virology Laboratory                                                                                                                                                                                                               | Yang Yang, Chengqiang Shen, Li Xing, Zhixiang Xu, Haxia Zheng, Yingxia Liu                                                                                                                                                                                                                                                                                                                |
| EPI_ISL_410301 | hCoV-19/Nepal/1/2020             | Asia / Nepal / Kathmandu                      | 2020-01-13      | National Influenza Centre, National Public Health Laboratory, Kathmandu, Nepal                                                                                                                                                | The University of Hong Kong                                                                                                                                                                                                                     | Eden J-S, Carter J, Rahman H, Holmes EC, Rockett R, O'Sullivan MV, Sitcherov V, Chen SC, Maddocks S, Kok J and Dwyer DE for the 2019-nCoV Study Group                                                                                                                                                                                                                                     |
| EPI_ISL_410351 | hCoV-19/Japan/KH-20-05-1/2020    | Asia / Japan / Nara                           | 2020-01-25      | Dept. of Pathology, National Institute of Infectious Diseases                                                                                                                                                                 | Pathogen Genomics Center, National Institute of Infectious Diseases                                                                                                                                                                             | Ben Huang, Alyssa Peay, Amanda De Jong, Andrew Van Den Hurk, Carmel Taylor, David Warrlow, Doris Gerge, Elisabeth Gerner, Glen Hewison, Ian Maxwell Mackay, Inga Sulares, Jamie McManus, Jean Barcilon, July Northall, Michael Finger, Natalie Simpson, Neelima Nair, Peter Bartondy, Peter Moore, Sarah Wheatley, Sean Moody, Shari Hall-Mendelin, Timothy Gardiner, and Frederick Moore |
| EPI_ISL_410352 | hCoV-19/Japan/OS-20-07-1/2020    | Asia / Japan / Osaka                          | 2020-01-23      | Dept. of Pathology, National Institute of Infectious Diseases                                                                                                                                                                 | Pathogen Genomics Center, National Institute of Infectious Diseases                                                                                                                                                                             | Ranjit Sah, Runa Jha, Daniel Chu, Haoguo Gu, Malik Peria, Anup Bastola, Alfonso J. Rodriguez-Morales, Bibek Kumar Lal, Basu Dev Pandey, Leo Poon                                                                                                                                                                                                                                          |
| EPI_ISL_410545 | hCoV-19/Italy/INM1-as/2020       | Europe / Italy / Rome                         | 2020-01-29      | INM Lazzaro Spallanzani IRCCS                                                                                                                                                                                                 | Laboratory of Virology, INM Lazzaro Spallanzani IRCCS                                                                                                                                                                                           | Tsuyoshi Sekizuka, Harutaka Katano, Shukuko Matsuyama, Nagasaki No, Kazuya Shirato, Motosu Suzuki, Hideo Hasegawa, Takaji Wakita, Makoto Takeda, Tadashi Suzuki, Makoto Kurita                                                                                                                                                                                                            |
| EPI_ISL_410546 | hCoV-19/Italy/INM1-ca/2020       | Europe / Italy / Rome                         | 2020-01-31      | INM Lazzaro Spallanzani IRCCS                                                                                                                                                                                                 | Laboratory of Virology, INM Lazzaro Spallanzani IRCCS                                                                                                                                                                                           | Maria R. Capobianchi, Cesare E. M. Gruber, Martina Roca, Barbara Bartolini, Francesco Messina, Emanuela Gronchi, Francesca Colaneri, Concetta Castelli, Eleonora Laferla, Fabrizio Carletti, Emanuele Nicotri, Giuseppe Ippolito                                                                                                                                                          |
| EPI_ISL_411902 | hCoV-19/Cambodia/01/2/2020       | Asia / Cambodia / Sihanoukville               | 2020-01-27      | Virology Unit, Institut Pasteur du Cambodge                                                                                                                                                                                   | Virology Unit, Institut Pasteur du Cambodge (Sequences done by: Jessica E Manning/Jennifer A Bohl at Malaria and Vector Research Laboratory, National Institute of Allergy and Infectious Diseases and Vida Ahyong from Chan-Zuckerberg Biohub) | Maria R. Capobianchi, Cesare E. M. Gruber, Martina Roca, Barbara Bartolini, Francesco Messina, Emanuela Gronchi, Francesca Colaneri, Concetta Castelli, Eleonora Laferla, Emanuele Nicotri, Giuseppe Ippolito                                                                                                                                                                             |
| EPI_ISL_412064 | hCoV-19/Brazil/SPBR-01/2020      | South America / Brazil / Sao Paulo / Sao      | 2020-02-25      | Hospital Israelita Albert Einstein                                                                                                                                                                                            | Instituto Adolfo Lutz Interdisciplinary Procedures Center Strategic Laboratory                                                                                                                                                                  | Erika A Karlsson, Jennifer A Bohl, Vida Ahyong, Vessna Duong, Philippe Dussart, Jessica E Manning                                                                                                                                                                                                                                                                                         |
| EPI_ISL_412070 | hCoV-19/USA/WA/2020              | North America / USA / Washington / Sno        | 2020-02-24      | Washington State Department of Health                                                                                                                                                                                         | Seattle Flu Study                                                                                                                                                                                                                               | Jacqueline Goss de Jesus, Claudio Tavares Sacchi, Daniela Bernades Borges da Silva, Ingra Moraes Ciano, Flavia Cristina da Silva Sales, Claudia Regina Gonçalves, Joshua Quack, Maria do Carmo, Sampaio Tavares Timenysky, Juliana James Lom, Andrew Ransford, Ester Corderia Salino, Nuno Rodrigues Faria                                                                                |
| EPI_ISL_412071 | hCoV-19/Finland/FIN-25/2020      | Europe / Finland / Helsinki                   | 2020-02-25      | HUS Diagnostikkakeskus, Helsinki                                                                                                                                                                                              | Department of Virology Faculty of Medicine, Medium University of Helsinki                                                                                                                                                                       | Heleen Chu, Michael Borch, Janet England, Michael Farnham, Barry Lutz, Deborah Anderson, Mark Reddy, Lea Starita, Matthew Thompson, Jay Shendure, and Trevor Bedford                                                                                                                                                                                                                      |
| EPI_ISL_412072 | hCoV-19/Mexico/CDMX-HORE_01/2020 | North America / Mexico / Mexico City          | 2020-02-27      | Instituto Nacional de Enfermedades Respiratorias                                                                                                                                                                              | Instituto de Diagnóstico y Referencia Epidemiológicos (INDRE)                                                                                                                                                                                   | Teemu Smura, Sivi Kulavainen, Hannamari Kallio-Kokko, Olli Vapalahti                                                                                                                                                                                                                                                                                                                      |
| EPI_ISL_412075 | hCoV-19/Australia/NSW05/2020     | Oceania / Australia / New South Wales         | 2020-02-28      | NSW Health Pathology - Institute of Clinical Pathology and Medical Research, Westmead Hospital, University of Sydney                                                                                                          | NSW Health Pathology - Institute of Clinical Pathology and Medical Research, Westmead Hospital, University of Sydney                                                                                                                            | Ramirez-Gonzalez Ernesto, Garces-Ayala Fabiola, Araza-Rodríguez Adrian, Mendizábal Edgar, Rodríguez-Maldonado Aril, Wong-Aremulua Claudia, Quintero-Perez Joel, Martinez-Arango, Boukidada Celia, Munoz-Medina Esteban, Sanchez-Alejandre, Isa Paez, Taboada Balcilla, Lopez Suarez, Arias Carlos, Barrios-Badillo Gessia, Hernandez                                                      |
| EPI_ISL_412078 | hCoV-19/Wuhan/HBCCD-HB-02/2020   | Asia / China / Hubei / Wuhan                  | 2020-01-17      | The Central Hospital of Wuhan                                                                                                                                                                                                 | Hubei Provincial Center for Disease Control and Prevention                                                                                                                                                                                      | Bin Fang, Xiang Li, Xiao Yu, Linlin Lu, Bo Yang, Faxian Zhan, Guojun Ye, Xiaohang Huo, Junqiang Xu, Bo Yu, Kun Cai, Jing Li, Yongzhong Jiang                                                                                                                                                                                                                                              |
| EPI_ISL_412079 | hCoV-19/Wuhan/HBCCD-HB-03/2020   | Asia / China / Hubei / Wuhan                  | 2020-01-18      | Union Hospital of Tongji Medical College, Huazhong University of Science and Technology                                                                                                                                       | Hubei Provincial Center for Disease Control and Prevention                                                                                                                                                                                      | Bin Fang, Xiang Li, Xiao Yu, Linlin Lu, Bo Yang, Faxian Zhan, Guojun Ye, Xiaohang Huo, Junqiang Xu, Bo Yu, Kun Cai, Jing Li, Yongzhong Jiang                                                                                                                                                                                                                                              |
| EPI_ISL_412080 | hCoV-19/Wuhan/HBCCD-HB-04/2020   | Asia / China / Hubei / Wuhan                  | 2020-01-18      | Union Hospital of Tongji Medical College, Huazhong University of Science and Technology                                                                                                                                       | Hubei Provincial Center for Disease Control and Prevention                                                                                                                                                                                      | Bin Fang, Xiang Li, Xiao Yu, Linlin Lu, Bo Yang, Faxian Zhan, Guojun Ye, Xiaohang Huo, Junqiang Xu, Bo Yu, Kun Cai, Jing Li, Yongzhong Jiang                                                                                                                                                                                                                                              |
| EPI_ISL_412081 | hCoV-19/Wuhan/HBCCD-HB-05/2020   | Asia / China / Hubei / Wuhan                  | 2020-01-18      | CRAWISCO GENERAL HOSPITAL                                                                                                                                                                                                     | Hubei Provincial Center for Disease Control and Prevention                                                                                                                                                                                      | Bin Fang, Xiang Li, Xiao Yu, Linlin Lu, Bo Yang, Faxian Zhan, Guojun Ye, Xiaohang Huo, Junqiang Xu, Bo Yu, Kun Cai, Jing Li, Yongzhong Jiang                                                                                                                                                                                                                                              |
| EPI_ISL_412082 | hCoV-19/Wuhan/HBCCD-HB-06/2020   | Asia / China / Hubei / Wuhan                  | 2020-02-07      | Wuhan Lung Hospital                                                                                                                                                                                                           | Hubei Provincial Center for Disease Control and Prevention                                                                                                                                                                                      | Bin Fang, Xiang Li, Xiao Yu, Linlin Lu, Bo Yang, Faxian Zhan, Guojun Ye, Xiaohang Huo, Junqiang Xu, Bo Yu, Kun Cai, Jing Li, Yongzhong Jiang                                                                                                                                                                                                                                              |
| EPI_ISL_412083 | hCoV-19/Taiwan/HBCCD-HB-07/2020  | Asia / China / Hubei / Taiwan                 | 2020-02-08      | Taiwan Center for Disease Control and Prevention                                                                                                                                                                              | Hubei Provincial Center for Disease Control and Prevention                                                                                                                                                                                      | Bin Fang, Xiang Li, Xiao Yu, Linlin Lu, Bo Yang, Faxian Zhan, Guojun Ye, Xiaohang Huo, Junqiang Xu, Bo Yu, Kun Cai, Jing Li, Yongzhong Jiang                                                                                                                                                                                                                                              |
| EPI_ISL_413522 | hCoV-19/India/1-27/2020          | Asia / India / Kerala                         | 2020-01-27      | Indian Council of Medical Research - National Institute of Virology                                                                                                                                                           | National Influenza Center, Indian Council of Medical Research - National Institute of Virology                                                                                                                                                  | Potdar V, Yadav PD, Choudhary M., Shele-Ach A                                                                                                                                                                                                                                                                                                                                             |
| EPI_ISL_413523 | hCoV-19/India/1-31/2020          | Asia / India / Kerala                         | 2020-01-31      | Indian Council of Medical Research - National Institute of Virology                                                                                                                                                           | National Influenza Center, Indian Council of Medical Research - National Institute of Virology                                                                                                                                                  | Potdar V, Yadav PD, Choudhary M., Shele-Ach A                                                                                                                                                                                                                                                                                                                                             |
| EPI_ISL_413550 | hCoV-19/Nigeria/Lagos/01/2020    | Africa / Nigeria / Lagos                      | 2020-02-27      | African Centre of Excellence for Genomics of Infectious Diseases (ACEGID), Redeemer's University, Ede, Osun State, Nigeria                                                                                                    | African Centre of Excellence for Genomics of Infectious Diseases (ACEGID), Redeemer's University, Ede, Osun State, Nigeria                                                                                                                      | Chunliu P.E., Ajagba-Jesus F., Kayode A., Oguzie J., Folarin O.A., Ihekweazu C. Hapli C.T.                                                                                                                                                                                                                                                                                                |
| EPI_ISL_413553 | hCoV-19/Iran/Tehran/15A/2020     | Asia / Iran / Tehran                          | 2020-02-28      | Iran National Influenza Center                                                                                                                                                                                                | Iran National Influenza Center                                                                                                                                                                                                                  | Jila Yavarian, Nazarin Zahra Shafiei Jandaghi, Kaveh Sadeghi, Fatemeh Ajmami, Naderian Ghavami and Tahar Mokhtari Azad                                                                                                                                                                                                                                                                    |
| EPI_ISL_413554 | hCoV-19/Iran/Tehran/18E/2020     | Asia / Iran / Tehran                          | 2020-02-23      | Iran National Influenza Center                                                                                                                                                                                                | Iran National Influenza Center                                                                                                                                                                                                                  | Jila Yavarian, Nazarin Zahra Shafiei Jandaghi, Kaveh Sadeghi, Fatemeh Ajmami, Naderian Ghavami, Fatemeh Ajmami, Naderian Ghavami, Tahar Mokhtari Azad                                                                                                                                                                                                                                     |
| EPI_ISL_413594 | hCoV-19/Australia/NSW08/2020     | Oceania / Australia / NSW / Sydney            | 2020-02-28      | Centre for Infectious Diseases and Microbiology Laboratory Services                                                                                                                                                           | NSW Health Pathology - Institute of Clinical Pathology and Medical Research, Westmead Hospital, University of Sydney                                                                                                                            | Rockett R, Eden J-S, Lam C, Gray K, Timms V, Gall M, Alicia A, Carter J, Rahman H, Holmes EC, O'Sullivan MV, Sitcherov V, Chen SC, Maddocks S, Kok J and Dwyer DE for the 2019-nCoV Study Group                                                                                                                                                                                           |
| EPI_ISL_413595 | hCoV-19/Australia/NSW09/2020     | Oceania / Australia / NSW / Sydney            | 2020-02-28      | Centre for Infectious Diseases and Microbiology Laboratory Services                                                                                                                                                           | NSW Health Pathology - Institute of Clinical Pathology and Medical Research, Westmead Hospital, University of Sydney                                                                                                                            | Rockett R, Eden J-S, Lam C, Gray K, Timms V, Gall M, Alicia A, Carter J, Rahman H, Holmes EC, O'Sullivan MV, Sitcherov V, Chen SC, Maddocks S, Kok J and Dwyer DE for the 2019-nCoV Study Group                                                                                                                                                                                           |
| EPI_ISL_413596 | hCoV-19/Australia/NSW10/2020     | Oceania / Australia / NSW / Sydney            | 2020-02-28      | Centre for Infectious Diseases and Microbiology - Public Health                                                                                                                                                               | NSW Health Pathology - Institute of Clinical Pathology and Medical Research, Westmead Hospital, University of Sydney                                                                                                                            | Rockett R, Eden J-S, Lam C, Gray K, Timms V, Gall M, Alicia A, Carter J, Rahman H, Holmes EC, O'Sullivan MV, Sitcherov V, Chen SC, Maddocks S, Kok J and Dwyer DE for the 2019-nCoV Study Group                                                                                                                                                                                           |
| EPI_ISL_413597 | hCoV-19/Australia/NSW11/2020     | Oceania / Australia / NSW / Sydney            | 2020-03-02      | Centre for Infectious Diseases and Microbiology - Public Health                                                                                                                                                               | NSW Health Pathology - Institute of Clinical Pathology and Medical Research, Westmead Hospital, University of Sydney                                                                                                                            | Rockett R, Eden J-S, Lam C, Gray K, Timms V, Gall M, Alicia A, Carter J, Rahman H, Holmes EC, O'Sullivan MV, Sitcherov V, Chen SC, Maddocks S, Kok J and Dwyer DE for the 2019-nCoV Study Group                                                                                                                                                                                           |
| EPI_ISL_413598 | hCoV-19/Australia/NSW12/2020     | Oceania / Australia / NSW / Sydney            | 2020-03-04      | Centre for Infectious Diseases and Microbiology - Public Health                                                                                                                                                               | NSW Health Pathology - Institute of Clinical Pathology and Medical Research, Westmead Hospital, University of Sydney                                                                                                                            | Rockett R, Eden J-S, Lam C, Gray K, Timms V, Gall M, Alicia A, Carter J, Rahman H, Holmes EC, O'Sullivan MV, Sitcherov V, Chen SC, Maddocks S, Kok J and Dwyer DE for the 2019-nCoV Study Group                                                                                                                                                                                           |
| EPI_ISL_413599 | hCoV-19/Australia/NSW13/2020     | Oceania / Australia / NSW / Sydney            | 2020-03-04      | Centre for Infectious Diseases and Microbiology - Public Health                                                                                                                                                               | NSW Health Pathology - Institute of Clinical Pathology and Medical Research, Westmead Hospital, University of Sydney                                                                                                                            | Rockett R, Eden J-S, Lam C, Gray K, Timms V, Gall M, Alicia A, Carter J, Rahman H, Holmes EC, O'Sullivan MV, Sitcherov V, Chen SC, Maddocks S, Kok J and Dwyer DE for the 2019-nCoV Study Group                                                                                                                                                                                           |
| EPI_ISL_413600 | hCoV-19/Australia/NSW14/2020     | Oceania / Australia / NSW / Sydney            | 2020-03-03      | Centre for Infectious Diseases and Microbiology - Public Health                                                                                                                                                               | NSW Health Pathology - Institute of Clinical Pathology and Medical Research, Westmead Hospital, University of Sydney                                                                                                                            | Rockett R, Eden J-S, Lam C, Gray K, Timms V, Gall M, Alicia A, Carter J, Rahman H, Holmes EC, O'Sullivan MV, Sitcherov V, Chen SC, Maddocks S, Kok J and Dwyer DE for the 2019-nCoV Study Group                                                                                                                                                                                           |
| EPI_ISL_413647 | hCoV-19/Portugal/CV62/2020       | Europe / Portugal                             | 2020-03-01      | Centro Hospital do Porto, E.P.E. - H. Geral de Santo Antonio                                                                                                                                                                  | Instituto Nacional de Saude (INS)                                                                                                                                                                                                               | Raquel Goulmer, Inês Costa, Pedro Pedreira, Joana Mendonça, Lúcia Vieira, Helena Ramos, Joana Isidro, Vitor Borges, João Paulo Gomes                                                                                                                                                                                                                                                      |
| EPI_ISL_413648 | hCoV-19/Portugal/CV63/2020       | Europe / Portugal                             | 2020-03-01      | Centro Hospital e Universitário de São João, Porto                                                                                                                                                                            | Instituto Nacional de Saude (INS)                                                                                                                                                                                                               | Raquel Goulmer, Inês Costa, Pedro Pedreira, Joana Mendonça, Lúcia Vieira, Helena Ramos, Joana Isidro, Vitor Borges, João Paulo Gomes                                                                                                                                                                                                                                                      |
| EPI_ISL_414014 | hCoV-19/Brazil/SPBR-03/2020      | South America / Brazil / Sao Paulo            | 2020-02-02      | Hospital Israelita Albert Einstein                                                                                                                                                                                            | Instituto Adolfo Lutz, Interdisciplinary Procedures Center, Strategic Laboratory                                                                                                                                                                | Claudio Tavares Sacchi, Claudia Regina Gonçalves, Kalia Correia dos Santos, Carlos Henrique Camargo, Maria do Carmo Sampaio Tavares Timenysky, Terézinha Maria de Paiva, Ester Corderia Salino                                                                                                                                                                                            |
| EPI_ISL_414015 | hCoV-19/Brazil/SPBR-06/2020      | South America / Brazil / Sao Paulo / Sao      | 2020-03-29      | Hospital São Joaquim Beneficência Portuguesa                                                                                                                                                                                  | Instituto Adolfo Lutz, Interdisciplinary Procedures Center, Strategic Laboratory                                                                                                                                                                | Claudio Tavares Sacchi, Claudia Regina Gonçalves, Kalia Correia dos Santos, Carlos Henrique Camargo, Maria do Carmo Sampaio Tavares Timenysky, Terézinha Maria de Paiva, Ester Corderia Salino                                                                                                                                                                                            |
| EPI_ISL_414016 | hCoV-19/Brazil/SPBR-05/2020      | South America / Brazil / Sao Paulo / Sao      | 2020-02-29      | Hospital São Joaquim Beneficência Portuguesa                                                                                                                                                                                  | Instituto Adolfo Lutz, Interdisciplinary Procedures Center, Strategic Laboratory                                                                                                                                                                | Claudio Tavares Sacchi, Claudia Regina Gonçalves, Kalia Correia dos Santos, Carlos Henrique Camargo, Maria do Carmo Sampaio Tavares Timenysky, Terézinha Maria de Paiva, Ester Corderia Salino                                                                                                                                                                                            |
| EPI_ISL_414017 | hCoV-19/Brazil/SPBR-04/2020      | South America / Brazil / Sao Paulo            | 2020-03-04      | Hospital São Joaquim Beneficência Portuguesa                                                                                                                                                                                  | Instituto Adolfo Lutz, Interdisciplinary Procedures Center, Strategic Laboratory                                                                                                                                                                | Claudio Tavares Sacchi, Claudia Regina Gonçalves, Kalia Correia dos Santos, Carlos Henrique Camargo, Maria do Carmo Sampaio Tavares Timenysky, Terézinha Maria de Paiva, Ester Corderia Salino                                                                                                                                                                                            |
| EPI_ISL_414045 | hCoV-19/Iran/Qom-25/04/2020      | Asia / Iran / Qom                             | 2020-02-15      | Iran National Influenza Center                                                                                                                                                                                                | Iran National Influenza Center                                                                                                                                                                                                                  | Nazarin Zahra Shafiei Jandaghi, Jila Yavarian, Kaveh Sadeghi, Fatemeh Ajmami, Naderian Ghavami, Tahar Mokhtari Azad                                                                                                                                                                                                                                                                       |
| EPI_ISL_416458 | hCoV-19/Kuwait/KU12/2020         | Asia / Kuwait / Kuwait                        | 2020-03-02      | Dasmann Diabetes Institute                                                                                                                                                                                                    | Dasmann Diabetes Institute                                                                                                                                                                                                                      | Fahd Al-Mulla, Sami Jahn, Sara Alqadiri, Rashaheba iqbal, Mutassem Mathem, Ebba alOzairi, Qais Al-Owaili                                                                                                                                                                                                                                                                                  |
| EPI_ISL_416469 | hCoV-19/Belgium/SH-03/03/2020    | Europe / Belgium / Kessel-Lo                  | 2020-03-03      | KU Leuven, Clinical and Epidemiological Virology                                                                                                                                                                              | KU Leuven, Clinical and Epidemiological Virology                                                                                                                                                                                                | Bert Vanmechelen, Tony Wawina, Joan Marti-Cameras, Piet Maes                                                                                                                                                                                                                                                                                                                              |
| EPI_ISL_416470 | hCoV-19/Belgium/SH-03/03/2020    | Europe / Belgium / Couffin                    | 2020-03-02      | KU Leuven, Clinical and Epidemiological Virology                                                                                                                                                                              | KU Leuven, Clinical and Epidemiological Virology                                                                                                                                                                                                | Bert Vanmechelen, Tony Wawina, Joan Marti-Cameras, Piet Maes                                                                                                                                                                                                                                                                                                                              |
| EPI_ISL_416471 | hCoV-19/Belgium/SH-03/03/2020    | Europe / Belgium / Kessel-Lo                  | 2020-03-02      | KU Leuven, Clinical and Epidemiological Virology                                                                                                                                                                              | KU Leuven, Clinical and Epidemiological Virology                                                                                                                                                                                                | Bert Vanmechelen, Tony Wawina, Joan Marti-Cameras, Piet Maes                                                                                                                                                                                                                                                                                                                              |
| EPI_ISL_416472 | hCoV-19/Belgium/UMF-03/03/2020   | Europe / Belgium / Kessel-Lo                  | 2020-03-02      | KU Leuven, Clinical and Epidemiological Virology                                                                                                                                                                              | KU Leuven, Clinical and Epidemiological Virology                                                                                                                                                                                                | Bert Vanmechelen, Tony Wawina, Joan Marti-Cameras, Piet Maes                                                                                                                                                                                                                                                                                                                              |
| EPI_ISL_416473 | hCoV-19/Hangzhou/ZJ-08/2020      | Asia / China / Hangzhou                       | 2020-01-26      | State Key Laboratory for Diagnosis and Treatment of Infectious Diseases, National Clinical Research Center for Infectious Diseases, First Affiliated Hospital, Zhejiang University School of Medicine, Hangzhou, China 310003 | State Key Laboratory for Diagnosis and Treatment of Infectious Diseases, National Clinical Research Center for Infectious Diseases, First Affiliated Hospital, Zhejiang University School of Medicine, Hangzhou, China 310003                   | Hangzhou Yao, Nanping Wu, Chao Jiang, Xiangyun Lu, Linfang Cheng, Fumin Liu, Zhigang Wu, Haibo Wu, Changzhong Jin, Min Zheng, Lanjuan Li                                                                                                                                                                                                                                                  |
| EPI_ISL_416474 | hCoV-19/Hangzhou/ZJ-09/2020      | Asia / China / Hangzhou                       | 2020-01-28      | State Key Laboratory for Diagnosis and Treatment of Infectious Diseases, National Clinical Research Center for Infectious Diseases, First Affiliated Hospital, Zhejiang University School of Medicine, Hangzhou, China 310003 | State Key Laboratory for Diagnosis and Treatment of Infectious Diseases, National Clinical Research Center for Infectious Diseases, First Affiliated Hospital, Zhejiang University School of Medicine, Hangzhou, China 310003                   | Hangzhou Yao, Nanping Wu, Chao Jiang, Xiangyun Lu, Linfang Cheng, Fumin Liu, Zhigang Wu, Haibo Wu, Changzhong Jin, Min Zheng, Lanjuan Li                                                                                                                                                                                                                                                  |
| EPI_ISL_416475 | hCoV-19/Hangzhou/ZJ-03/2020      | Europe / Belgium / Kessel-Lo                  | 2020-03-03      | KU Leuven, Clinical and Epidemiological Virology                                                                                                                                                                              | KU Leuven, Clinical and Epidemiological Virology                                                                                                                                                                                                | Bert Vanmechelen, Tony Wawina, Joan Marti-Cameras, Piet Maes                                                                                                                                                                                                                                                                                                                              |
| EPI_ISL_416493 | hCoV-19/France/HF2196/2020       | Europe / France / Hauts de France / Châ       | 2020-03-08      | CH Jean de Navarre Laboratoire de Biologie                                                                                                                                                                                    | National Reference Center for Viruses of Respiratory Infections, Institut Pasteur, Paris                                                                                                                                                        | Méline Albert, Marion Barbet, Sylvie Behilli, Méline Bizard, Angela Brisiarola, Flora Donati, Elénie Simon-Lorène, Vincent Enouf, Maud Vargempe, Sylvie van der Werf                                                                                                                                                                                                                      |
| EPI_ISL_416494 | hCoV-19/France/N223/2020         | Europe / France / Normandie / Rouen           | 2020-03-04      | Centre Hospitalier Universitaire de Rouen Laboratoire de Virologie                                                                                                                                                            | National Reference Center for Viruses of Respiratory Infections, Institut Pasteur, Paris                                                                                                                                                        | Méline Albert, Marion Barbet, Sylvie Behilli, Méline Bizard, Angela Brisiarola, Flora Donati, Elénie Simon-Lorène, Vincent Enouf, Maud Vargempe, Sylvie van der Werf, Raulin Oliva                                                                                                                                                                                                        |
| EPI_ISL_416495 | hCoV-19/France/HF2234/2020       | Europe / France / Hauts de France / Cor       | 2020-03-10      | Centre Hospitalier Compigné Laboratoire de Biologie                                                                                                                                                                           | National Reference Center for Viruses of Respiratory Infections, Institut Pasteur, Paris                                                                                                                                                        | Méline Albert, Marion Barbet, Sylvie Behilli, Méline Bizard, Angela Brisiarola, Flora Donati, Elénie Simon-Lorène, Vincent Enouf, Maud Vargempe, Sylvie van der Werf, Raulin Oliva                                                                                                                                                                                                        |
| EPI_ISL_416496 | hCoV-19/France/HF2237/2020       | Europe / France / Hauts de France / Cor       | 2020-03-10      | Centre Hospitalier Compigné Laboratoire de Biologie                                                                                                                                                                           | National Reference Center for Viruses of Respiratory Infections, Institut Pasteur, Paris                                                                                                                                                        | Méline Albert, Marion Barbet, Sylvie Behilli, Méline Bizard, Angela Brisiarola, Flora Donati, Elénie Simon-Lorène, Vincent Enouf, Maud Vargempe, Sylvie van der Werf, Raulin Oliva                                                                                                                                                                                                        |
| EPI_ISL_416497 | hCoV-19/France/HF2239/2020       | Europe / France / Hauts de France / Cor       | 2020-03-10      | Centre Hospitalier Compigné Laboratoire de Biologie                                                                                                                                                                           | National Reference Center for Viruses of Respiratory Infections, Institut Pasteur, Paris                                                                                                                                                        | Méline Albert, Marion Barbet, Sylvie Behilli, Méline Bizard, Angela Brisiarola, Flora Donati, Elénie Simon-Lorène, Vincent Enouf, Maud Vargempe, Sylvie van der Werf, Raulin Oliva                                                                                                                                                                                                        |
| EPI_ISL_416498 | hCoV-19/France/IDF2256/2020      | Europe / France / Ile de France / Garche      | 2020-03-11      | Institut Médico légal - Hop R. Poincaré                                                                                                                                                                                       | National Reference Center for Viruses of Respiratory Infections, Institut Pasteur, Paris                                                                                                                                                        | Méline Albert, Marion Barbet, Sylvie Behilli, Méline Bizard, Angela Brisiarola, Flora Donati, Elénie Simon-Lorène, Vincent Enouf, Maud Vargempe, Sylvie van der Werf, Raulin Oliva                                                                                                                                                                                                        |
| EPI_ISL_416499 | hCoV-19/France/IDF2276/2020      | Europe / France / Ile de France / Longjumeau  | 2020-03-11      | LAHM GH Nord Essonne                                                                                                                                                                                                          | National Reference Center for Viruses of Respiratory Infections, Institut Pasteur, Paris                                                                                                                                                        | Méline Albert, Marion Barbet, Sylvie Behilli, Méline Bizard, Angela Brisiarola, Flora Donati, Elénie Simon-Lorène, Vincent Enouf, Maud Vargempe, Sylvie van der Werf, Raulin Oliva                                                                                                                                                                                                        |
| EPI_ISL_416600 | hCoV-19/Japan/DP0438/2020        | Asia / Japan / unknown                        | 2020-02-16      | Japanese Quarantine Stations                                                                                                                                                                                                  | Pathogen Genomics Center, National Institute of Infectious Diseases                                                                                                                                                                             | Kageyama, Shiro Saito, Ikuo Takayama, Hideo Hasegawa, Takaji Wakita, Hajime Kamiya, Takuya Yamagishi, Motosu Suzuki, Takaji Wakita, Makoto Kurata                                                                                                                                                                                                                                         |
| EPI_ISL_416601 | hCoV-19/Japan/DP0457/2020        | Asia / Japan / unknown                        | 2020-02-16      | Japanese Quarantine Stations                                                                                                                                                                                                  | Pathogen Genomics Center, National Institute of Infectious Diseases                                                                                                                                                                             | Kageyama, Shiro Saito, Ikuo Takayama, Hideo Hasegawa, Takaji Wakita, Hajime Kamiya, Takuya Yamagishi, Motosu Suzuki, Takaji Wakita, Makoto Kurata                                                                                                                                                                                                                                         |
| EPI_ISL_416602 | hCoV-19/Japan/DP0462/2020        | Asia / Japan / unknown                        | 2020-02-16      | Japanese Quarantine Stations                                                                                                                                                                                                  | Pathogen Genomics Center, National Institute of Infectious Diseases                                                                                                                                                                             | Kageyama, Shiro Saito, Ikuo Takayama, Hideo Hasegawa, Takaji Wakita, Hajime Kamiya, Takuya Yamagishi, Motosu Suzuki, Takaji Wakita, Makoto Kurata                                                                                                                                                                                                                                         |

[illegible]

|                |                                            |                                                        |                                                     |                                                                                               |                                                                                                                                                                          |
|----------------|--------------------------------------------|--------------------------------------------------------|-----------------------------------------------------|-----------------------------------------------------------------------------------------------|--------------------------------------------------------------------------------------------------------------------------------------------------------------------------|
| EPI_ISL_417193 | hCoV-19/Hong Kong/HKPU32_0402/2020         | Asia / Hong Kong                                       | 2020-02-09                                          | Department of Clinical Pathology, Pamela Youde Netherese Eastern Hospital                     | Department of Health Technology and Informatics, Faculty of Health and Social Science, The Hong Kong Polytechnic University                                              |
| EPI_ISL_417195 | hCoV-19/Hong Kong/HKPU33_0202/2020         | Asia / Hong Kong                                       | 2020-02-09                                          | Department of Clinical Pathology, Pamela Youde Netherese Eastern Hospital                     | Department of Health Technology and Informatics, Faculty of Health and Social Science, The Hong Kong Polytechnic University                                              |
| EPI_ISL_417919 | hCoV-19/Malaysia/186197/2020               | Asia / Malaysia / Kuala Lumpur                         | 2020-03-14                                          | Department of Medical Microbiology, University Malaysia Medical Centre                        | Department of Medical Microbiology, Faculty of Medicine, University of Malaya                                                                                            |
| EPI_ISL_417920 | hCoV-19/Malaysia/190309/2020               | Asia / Malaysia / Kuala Lumpur                         | 2020-03-22                                          | Department of Medical Microbiology, University Malaysia Medical Centre                        | Department of Medical Microbiology, Faculty of Medicine, University of Malaya                                                                                            |
| EPI_ISL_417924 | hCoV-19/Colombia/HS-79256/2020             | South America / Colombia / Antioquia                   | 2020-03-11                                          | Secretaría de Salud Medellín                                                                  | Instituto Nacional de Salud, Universidad Cooperativa de Colombia, Instituto Alexander von Humboldt Imperial College London, London School of Hygiene & Tropical Medicine |
| EPI_ISL_417930 | hCoV-19/Brazil/GOI0106/2020                | South America / Brazil / Goiás                         | 2020-03-13                                          | Laboratório Hermes Pardini                                                                    | Bioinformatics Laboratory - LNNC                                                                                                                                         |
| EPI_ISL_417940 | hCoV-19/Brazil/MGO109/2020                 | South America / Brazil / Minas Gerais                  | 2020-03-16                                          | Laboratório Hermes Pardini                                                                    | Bioinformatics Laboratory - LNNC                                                                                                                                         |
| EPI_ISL_417945 | hCoV-19/Brazil/SP0111/2020                 | South America / Brazil / São Paulo                     | 2020-03-17                                          | Laboratório Hermes Pardini                                                                    | Bioinformatics Laboratory - LNNC                                                                                                                                         |
| EPI_ISL_418220 | hCoV-19/France/HF1645/2020                 | Europe / France / Hauts de France / Cor2020-02-28      | Centre Hospitalier Compigné Laboratoire de Biologie | National Reference Center for Viruses of Respiratory Infections, Institut Pasteur, Paris      |                                                                                                                                                                          |
| EPI_ISL_418221 | hCoV-19/France/HF1813/2020                 | Europe / France / Hauts de France / Cor2020-03-02      | Centre Hospitalier Compigné Laboratoire de Biologie | National Reference Center for Viruses of Respiratory Infections, Institut Pasteur, Paris      |                                                                                                                                                                          |
| EPI_ISL_418222 | hCoV-19/France/CVL2009/2020                | Europe / France / Centre-Val de Loire / T2020-03-04    | CHRU Bretonneau - Serv. Bactério-Viro.              | National Reference Center for Viruses of Respiratory Infections, Institut Pasteur, Paris      |                                                                                                                                                                          |
| EPI_ISL_418223 | hCoV-19/France/HF2069/2020                 | Europe / France / Hauts de France / Cor2020-03-05      | Centre Hospitalier Compigné Laboratoire de Biologie | National Reference Center for Viruses of Respiratory Infections, Institut Pasteur, Paris      |                                                                                                                                                                          |
| EPI_ISL_418224 | hCoV-19/France/HF2150/2020                 | Europe / France / Hauts de France / Cor2020-03-08      | Centre Hospitalier Compigné Laboratoire de Biologie | National Reference Center for Viruses of Respiratory Infections, Institut Pasteur, Paris      |                                                                                                                                                                          |
| EPI_ISL_418225 | hCoV-19/France/HF2155/2020                 | Europe / France / Hauts de France / Cor2020-03-08      | Centre Hospitalier Compigné Laboratoire de Biologie | National Reference Center for Viruses of Respiratory Infections, Institut Pasteur, Paris      |                                                                                                                                                                          |
| EPI_ISL_418226 | hCoV-19/France/HF2361/2020                 | Europe / France / Hauts de France / Cra2020-03-09      | EHPAD - Résidences les Cèdres                       | National Reference Center for Viruses of Respiratory Infections, Institut Pasteur, Paris      |                                                                                                                                                                          |
| EPI_ISL_418227 | hCoV-19/France/HF2363/2020                 | Europe / France / Hauts de France / Cor2020-03-12      | Centre Hospitalier Compigné Laboratoire de Biologie | National Reference Center for Viruses of Respiratory Infections, Institut Pasteur, Paris      |                                                                                                                                                                          |
| EPI_ISL_418228 | hCoV-19/France/HF2405/2020                 | Europe / France / Hauts de France / Cor2020-03-12      | Centre Hospitalier Compigné Laboratoire de Biologie | National Reference Center for Viruses of Respiratory Infections, Institut Pasteur, Paris      |                                                                                                                                                                          |
| EPI_ISL_418229 | hCoV-19/France/IDF2410/2020                | Europe / France / Ile de France / Levallois2020-03-12  | Hopital France britannique - Laboratoire            | National Reference Center for Viruses of Respiratory Infections, Institut Pasteur, Paris      |                                                                                                                                                                          |
| EPI_ISL_418230 | hCoV-19/France/IDF2420/2020                | Europe / France / Ile de France / Paris                | Clinique AVERAY LA BROUSTE, Med. Polyvalente        | National Reference Center for Viruses of Respiratory Infections, Institut Pasteur, Paris      |                                                                                                                                                                          |
| EPI_ISL_418231 | hCoV-19/France/HF2496/2020                 | Europe / France / Hauts de France / Cor2020-03-15      | Centre Hospitalier Compigné Laboratoire de Biologie | National Reference Center for Viruses of Respiratory Infections, Institut Pasteur, Paris      |                                                                                                                                                                          |
| EPI_ISL_418232 | hCoV-19/France/IDF2532/2020                | Europe / France / Ile de France / Meudon2020-03-15     | Service des Urgences                                | National Reference Center for Viruses of Respiratory Infections, Institut Pasteur, Paris      |                                                                                                                                                                          |
| EPI_ISL_418233 | hCoV-19/France/IDF2533/2020                | Europe / France / Ile de France / Meudon2020-03-15     | Service des Urgences                                | National Reference Center for Viruses of Respiratory Infections, Institut Pasteur, Paris      |                                                                                                                                                                          |
| EPI_ISL_418234 | hCoV-19/France/IDF2534/2020                | Europe / France / Ile de France / Longjumeau2020-03-14 | LABM GH Nord Essonne                                | National Reference Center for Viruses of Respiratory Infections, Institut Pasteur, Paris      |                                                                                                                                                                          |
| EPI_ISL_418235 | hCoV-19/France/IDF2561/2020                | Europe / France / Ile de France / Vanves2020-03-16     | Cabinet médical                                     | National Reference Center for Viruses of Respiratory Infections, Institut Pasteur, Paris      |                                                                                                                                                                          |
| EPI_ISL_418236 | hCoV-19/France/HF2566/2020                 | Europe / France / Hauts de France / Cor2020-03-16      | Centre Hospitalier Compigné Laboratoire de Biologie | National Reference Center for Viruses of Respiratory Infections, Institut Pasteur, Paris      |                                                                                                                                                                          |
| EPI_ISL_418237 | hCoV-19/France/HF2566/2020                 | Europe / France / Hauts de France / Cor2020-03-16      | Centre Hospitalier Compigné Laboratoire de Biologie | National Reference Center for Viruses of Respiratory Infections, Institut Pasteur, Paris      |                                                                                                                                                                          |
| EPI_ISL_418238 | hCoV-19/France/HF2597/2020                 | Europe / France / Hauts de France / Cor2020-03-16      | Centre Hospitalier Compigné Laboratoire de Biologie | National Reference Center for Viruses of Respiratory Infections, Institut Pasteur, Paris      |                                                                                                                                                                          |
| EPI_ISL_418239 | hCoV-19/France/HF2601/2020                 | Europe / France / Hauts de France / Cor2020-03-16      | Centre Hospitalier Compigné Laboratoire de Biologie | National Reference Center for Viruses of Respiratory Infections, Institut Pasteur, Paris      |                                                                                                                                                                          |
| EPI_ISL_418240 | hCoV-19/France/IDF2684/2020                | Europe / France / Ile de France / Longjumeau2020-03-16 | LABM GH Nord Essonne                                | National Reference Center for Viruses of Respiratory Infections, Institut Pasteur, Paris      |                                                                                                                                                                          |
| EPI_ISL_418241 | hCoV-19/Algeria/G0638_2264/2020            | Africa / Algeria / Boufarik                            | 2020-03-02                                          | NIC Viral Respiratory Unit - Institut Pasteur of Algeria                                      | National Reference Center for Viruses of Respiratory Infections, Institut Pasteur, Paris                                                                                 |
| EPI_ISL_418242 | hCoV-19/Algeria/G0640_2265/2020            | Africa / Algeria / Blida                               | 2020-03-08                                          | NIC Viral Respiratory Unit - Institut Pasteur of Algeria                                      | National Reference Center for Viruses of Respiratory Infections, Institut Pasteur, Paris                                                                                 |
| EPI_ISL_418243 | hCoV-19/Spain/Andalusia/201372/2020        | Europe / Spain / Andalusia                             | 2020-02-28                                          | HOSPITAL UNIVERSITARIO VIRGEN DE LAS NIEVES                                                   | Instituto de Salud Carlos III                                                                                                                                            |
| EPI_ISL_418244 | hCoV-19/Spain/Andalusia/201373/2020        | Europe / Spain / Andalusia                             | 2020-03-02                                          | HOSPITAL UNIVERSITARIO VIRGEN DE LAS NIEVES                                                   | Instituto de Salud Carlos III                                                                                                                                            |
| EPI_ISL_418245 | hCoV-19/Spain/CastillaLaMancha/201328/2020 | Europe / Spain / Castilla La Mancha                    | 2020-03-01                                          | Hospital General y Universitario de Guadalajara                                               | Instituto de Salud Carlos III                                                                                                                                            |
| EPI_ISL_418246 | hCoV-19/Spain/CastillaLaMancha/201329/2020 | Europe / Spain / Castilla La Mancha                    | 2020-03-01                                          | Hospital General y Universitario de Guadalajara                                               | Instituto de Salud Carlos III                                                                                                                                            |
| EPI_ISL_418247 | hCoV-19/Spain/CastillaLeón/201091/2020     | Europe / Spain / Castilla y León                       | 2020-02-26                                          | HOSPITAL GENERAL DE SEGOVIA                                                                   | Instituto de Salud Carlos III                                                                                                                                            |
| EPI_ISL_418248 | hCoV-19/Spain/CastillaLeón/201323/2020     | Europe / Spain / Castilla y León                       | 2020-03-01                                          | COMPLEJO ASISTENCIAL UNIVERSITARIO DE BURGOS                                                  | Instituto de Salud Carlos III                                                                                                                                            |
| EPI_ISL_418249 | hCoV-19/Spain/CastillaLeón/201372/2020     | Europe / Spain / Castilla y León                       | 2020-03-03                                          | COMPLEJO ASISTENCIAL UNIVERSITARIO DE BURGOS                                                  | Instituto de Salud Carlos III                                                                                                                                            |
| EPI_ISL_418250 | hCoV-19/Spain/Cataluña/201396/2020         | Europe / Spain / Cataluña                              | 2020                                                | HOSPITAL CLINIC                                                                               | Instituto de Salud Carlos III                                                                                                                                            |
| EPI_ISL_418251 | hCoV-19/Spain/Madrid/201105/2020           | Europe / Spain / Madrid                                | 2020-02-25                                          | HOSPITAL UNIVERSITARIO LA PAZ                                                                 | Instituto de Salud Carlos III                                                                                                                                            |
| EPI_ISL_418252 | hCoV-19/Spain/Madrid/201449/2020           | Europe / Spain / Madrid                                | 2020-03-04                                          | FUNDACION JIMENEZ DIAZ                                                                        | Instituto de Salud Carlos III                                                                                                                                            |
| EPI_ISL_418253 | hCoV-19/Spain/PaisVasco/201382/2020        | Europe / Spain / Basque Country                        | 2020-03-02                                          | HOSPITAL TXAGORRIKUTX                                                                         | Instituto de Salud Carlos III                                                                                                                                            |
| EPI_ISL_418254 | hCoV-19/Italy/TE4860/2020                  | Europe / Italy / Abruzzo                               | 2020-03-14                                          | Ospedale "San Leonardo" di Atri                                                               | Instituto Zooniprotattico Sperimentale dell'Abruzzo e Molise "G. Caporale"                                                                                               |
| EPI_ISL_418257 | hCoV-19/Italy/TE5056/2020                  | Europe / Italy / Abruzzo                               | 2020-03-17                                          | Ospedale Civile Giuseppe Mazzini, Teramo                                                      | Instituto Zooniprotattico Sperimentale dell'Abruzzo e Molise "G. Caporale"                                                                                               |
| EPI_ISL_418259 | hCoV-19/Italy/TE4959/2020                  | Europe / Italy / Abruzzo                               | 2020-03-14                                          | Presidio ospedaliero "Santo Spirito"                                                          | Instituto Zooniprotattico Sperimentale dell'Abruzzo e Molise "G. Caporale"                                                                                               |
| EPI_ISL_418262 | hCoV-19/Colombia/Bogotá/78390/2020         | South America / Colombia / Bogotá                      | 2020-03-06                                          | Instituto Nacional de Salud                                                                   | Instituto Nacional de Salud Universidad Cooperativa de Colombia Instituto Alexander von Humboldt Imperial College London School of Hygiene & Tropical Medicine           |
| EPI_ISL_418268 | hCoV-19/Spain/PaisVasco/04/2020            | Europe / Spain / Catalunya                             | 2020-03-13                                          | Hospital Universitari Germans Trias i Pujol/HUGTPI/Unidad Lúida contra la SIDA/ITLSida/ITRCSA | InsCaixa ADS Research Lab Public Health Virology Cardiff                                                                                                                 |
| EPI_ISL_419503 | hCoV-19/Wales/PHWC-2402/2020               | Europe / United Kingdom / Wales                        | 2020-03-20                                          |                                                                                               |                                                                                                                                                                          |
| EPI_ISL_419707 | hCoV-19/Spain/Cataluña/201397/2020         | Europe / Spain / Cataluña                              | 2020                                                | HOSPITAL CLINIC                                                                               | Instituto de Salud Carlos III                                                                                                                                            |
| EPI_ISL_419709 | hCoV-19/Spain/PaisVasco/201602/2020        | Europe / Spain / Basque Country                        | 2020-03-04                                          | HOSPITAL TXAGORRIKUTX                                                                         | Instituto de Salud Carlos III                                                                                                                                            |
| EPI_ISL_421182 | hCoV-19/Belgium/ULG-10001/2020             | Europe / Belgium / Liège                               | 2020-03-30                                          | Department of Clinical Microbiology                                                           | GIGA Medical Genomics                                                                                                                                                    |

|                |                                              |                                              |            |                                                                       |                                                              |                                           |
|----------------|----------------------------------------------|----------------------------------------------|------------|-----------------------------------------------------------------------|--------------------------------------------------------------|-------------------------------------------|
| EPI_ISL_421184 | hCoV-19/Belgium/ULG-10003/2020               | Europe / Belgium / Liege                     | 2020-03-30 | Department of Clinical Microbiology                                   | GIGA Medical Genomics                                        | Mein, Marie-Pierre Hayette, Vincent Bours |
| EPI_ISL_421186 | hCoV-19/Belgium/ULG-10004/2020               | Europe / Belgium / Liege                     | 2020-03-31 | Department of Clinical Microbiology                                   | GIGA Medical Genomics                                        | Mein, Marie-Pierre Hayette, Vincent Bours |
| EPI_ISL_421185 | hCoV-19/Belgium/ULG-10006/2020               | Europe / Belgium / Liege                     | 2020-03-30 | Department of Clinical Microbiology                                   | GIGA Medical Genomics                                        | Mein, Marie-Pierre Hayette, Vincent Bours |
| EPI_ISL_421186 | hCoV-19/Belgium/ULG-10007/2020               | Europe / Belgium / Liege                     | 2020-03-30 | Department of Clinical Microbiology                                   | GIGA Medical Genomics                                        | Mein, Marie-Pierre Hayette, Vincent Bours |
| EPI_ISL_421187 | hCoV-19/Belgium/ULG-10008/2020               | Europe / Belgium / Liege                     | 2020-03-30 | Department of Clinical Microbiology                                   | GIGA Medical Genomics                                        | Mein, Marie-Pierre Hayette, Vincent Bours |
| EPI_ISL_421188 | hCoV-19/Belgium/ULG-10009/2020               | Europe / Belgium / Liege                     | 2020-03-30 | Department of Clinical Microbiology                                   | GIGA Medical Genomics                                        | Mein, Marie-Pierre Hayette, Vincent Bours |
| EPI_ISL_421189 | hCoV-19/Belgium/ULG-10011/2020               | Europe / Belgium / Liege                     | 2020-03-30 | Department of Clinical Microbiology                                   | GIGA Medical Genomics                                        | Mein, Marie-Pierre Hayette, Vincent Bours |
| EPI_ISL_421190 | hCoV-19/Belgium/ULG-10012/2020               | Europe / Belgium / Liege                     | 2020-03-30 | Department of Clinical Microbiology                                   | GIGA Medical Genomics                                        | Mein, Marie-Pierre Hayette, Vincent Bours |
| EPI_ISL_421191 | hCoV-19/Belgium/ULG-10013/2020               | Europe / Belgium / Liege                     | 2020-03-31 | Department of Clinical Microbiology                                   | GIGA Medical Genomics                                        | Mein, Marie-Pierre Hayette, Vincent Bours |
| EPI_ISL_421192 | hCoV-19/Belgium/ULG-10014/2020               | Europe / Belgium / Liege                     | 2020-03-30 | Department of Clinical Microbiology                                   | GIGA Medical Genomics                                        | Mein, Marie-Pierre Hayette, Vincent Bours |
| EPI_ISL_421193 | hCoV-19/Belgium/ULG-10015/2020               | Europe / Belgium / Liege                     | 2020-03-31 | Department of Clinical Microbiology                                   | GIGA Medical Genomics                                        | Mein, Marie-Pierre Hayette, Vincent Bours |
| EPI_ISL_421194 | hCoV-19/Belgium/ULG-10016/2020               | Europe / Belgium / Liege                     | 2020-03-30 | Department of Clinical Microbiology                                   | GIGA Medical Genomics                                        | Mein, Marie-Pierre Hayette, Vincent Bours |
| EPI_ISL_421195 | hCoV-19/Belgium/ULG-10017/2020               | Europe / Belgium / Liege                     | 2020-03-30 | Department of Clinical Microbiology                                   | GIGA Medical Genomics                                        | Mein, Marie-Pierre Hayette, Vincent Bours |
| EPI_ISL_421196 | hCoV-19/Belgium/UG-10018/2020                | Europe / Belgium / Liege                     | 2020-03-30 | Department of Clinical Microbiology                                   | GIGA Medical Genomics                                        | Mein, Marie-Pierre Hayette, Vincent Bours |
| EPI_ISL_421211 | hCoV-19/Belgium/ULG-10044/2020               | Europe / Belgium / Liege                     | 2020-03-31 | Department of Clinical Microbiology                                   | GIGA Medical Genomics                                        | Mein, Marie-Pierre Hayette, Vincent Bours |
| EPI_ISL_421221 | hCoV-19/Hangzhou/GZCCD08789/2020             | Asia / China / Hangzhou                      | 2020-03-15 | Hangzhou Center for Diseases Control and Prevention                   | Hangzhou Center for Diseases Control and Prevention          | Mein, Marie-Pierre Hayette, Vincent Bours |
| EPI_ISL_421222 | hCoV-19/Hangzhou/GZCCD08786/2020             | Asia / China / Hangzhou                      | 2020-03-14 | Hangzhou Center for Diseases Control and Prevention                   | Hangzhou Center for Diseases Control and Prevention          | Mein, Marie-Pierre Hayette, Vincent Bours |
| EPI_ISL_421223 | hCoV-19/Hangzhou/GZCCD01657/2020             | Asia / China / Hangzhou                      | 2020-01-23 | Hangzhou Center for Diseases Control and Prevention                   | Hangzhou Center for Diseases Control and Prevention          | Mein, Marie-Pierre Hayette, Vincent Bours |
| EPI_ISL_421224 | hCoV-19/Hangzhou/GZCCD019162/2020            | Asia / China / Hangzhou                      | 2020-01-23 | Hangzhou Center for Diseases Control and Prevention                   | Hangzhou Center for Diseases Control and Prevention          | Mein, Marie-Pierre Hayette, Vincent Bours |
| EPI_ISL_421225 | hCoV-19/Hangzhou/GZCCD01356/2020             | Asia / China / Hangzhou                      | 2020-01-22 | Hangzhou Center for Diseases Control and Prevention                   | Hangzhou Center for Diseases Control and Prevention          | Mein, Marie-Pierre Hayette, Vincent Bours |
| EPI_ISL_421226 | hCoV-19/Hangzhou/GZCCD0119/2020              | Asia / China / Hangzhou                      | 2020-01-22 | Hangzhou Center for Diseases Control and Prevention                   | Hangzhou Center for Diseases Control and Prevention          | Mein, Marie-Pierre Hayette, Vincent Bours |
| EPI_ISL_421227 | hCoV-19/Hangzhou/GZCCD00911/2020             | Asia / China / Hangzhou                      | 2020-01-21 | Hangzhou Center for Diseases Control and Prevention                   | Hangzhou Center for Diseases Control and Prevention          | Mein, Marie-Pierre Hayette, Vincent Bours |
| EPI_ISL_421228 | hCoV-19/Hangzhou/GZCCD0091/2020              | Asia / China / Hangzhou                      | 2020-01-21 | Hangzhou Center for Diseases Control and Prevention                   | Hangzhou Center for Diseases Control and Prevention          | Mein, Marie-Pierre Hayette, Vincent Bours |
| EPI_ISL_421229 | hCoV-19/Hangzhou/GZCCD00801/2020             | Asia / China / Hangzhou                      | 2020-01-21 | Hangzhou Center for Diseases Control and Prevention                   | Hangzhou Center for Diseases Control and Prevention          | Mein, Marie-Pierre Hayette, Vincent Bours |
| EPI_ISL_421230 | hCoV-19/Hangzhou/GZCCD0090/2020              | Asia / China / Hangzhou                      | 2020-01-21 | Hangzhou Center for Diseases Control and Prevention                   | Hangzhou Center for Diseases Control and Prevention          | Mein, Marie-Pierre Hayette, Vincent Bours |
| EPI_ISL_421231 | hCoV-19/Hangzhou/GZCCD00496/2020             | Asia / China / Hangzhou                      | 2020-01-21 | Hangzhou Center for Diseases Control and Prevention                   | Hangzhou Center for Diseases Control and Prevention          | Mein, Marie-Pierre Hayette, Vincent Bours |
| EPI_ISL_421232 | hCoV-19/Hangzhou/GZCCD00481/2020             | Asia / China / Hangzhou                      | 2020-01-21 | Hangzhou Center for Diseases Control and Prevention                   | Hangzhou Center for Diseases Control and Prevention          | Mein, Marie-Pierre Hayette, Vincent Bours |
| EPI_ISL_421233 | hCoV-19/Hangzhou/GZCCD0048/2020              | Asia / China / Hangzhou                      | 2020-01-21 | Hangzhou Center for Diseases Control and Prevention                   | Hangzhou Center for Diseases Control and Prevention          | Mein, Marie-Pierre Hayette, Vincent Bours |
| EPI_ISL_421234 | hCoV-19/Hangzhou/GZCCD00205/2020             | Asia / China / Hangzhou                      | 2020-01-21 | Hangzhou Center for Diseases Control and Prevention                   | Hangzhou Center for Diseases Control and Prevention          | Mein, Marie-Pierre Hayette, Vincent Bours |
| EPI_ISL_421235 | hCoV-19/Hangzhou/GZCCD0013/2020              | Asia / China / Hangzhou                      | 2020-01-20 | Hangzhou Center for Diseases Control and Prevention                   | Hangzhou Center for Diseases Control and Prevention          | Mein, Marie-Pierre Hayette, Vincent Bours |
| EPI_ISL_421236 | hCoV-19/Hangzhou/GZCCD0012/2020              | Asia / China / Hangzhou                      | 2020-01-20 | Hangzhou Center for Diseases Control and Prevention                   | Hangzhou Center for Diseases Control and Prevention          | Mein, Marie-Pierre Hayette, Vincent Bours |
| EPI_ISL_421275 | hCoV-19/Russia/Moscow_PMRU-1/2020            | Europe / Russia / Moscow                     | 2020-03-18 | Russian State Collection of Viruses                                   | Pathogenic Microorganisms Variability Laboratory             | Mein, Marie-Pierre Hayette, Vincent Bours |
| EPI_ISL_422563 | hCoV-19/Ecuador/HGSQ-USFO-018/2020           | South America / Ecuador / Pichincha          | 2020-03-30 | Institute of Microbiology Universidad San Francisco de Quito          | Institute of Microbiology Universidad San Francisco de Quito | Mein, Marie-Pierre Hayette, Vincent Bours |
| EPI_ISL_422564 | hCoV-19/Ecuador/HGSQ-USFO-007/2020           | South America / Ecuador / Pichincha          | 2020-03-30 | Institute of Microbiology Universidad San Francisco de Quito          | Institute of Microbiology Universidad San Francisco de Quito | Mein, Marie-Pierre Hayette, Vincent Bours |
| EPI_ISL_422565 | hCoV-19/Ecuador/HGSQ-USFO-010/2020           | South America / Ecuador / Pichincha          | 2020-03-30 | Institute of Microbiology Universidad San Francisco de Quito          | Institute of Microbiology Universidad San Francisco de Quito | Mein, Marie-Pierre Hayette, Vincent Bours |
| EPI_ISL_422636 | hCoV-19/Czech Republic/2741/2020             | Europe / Czech Republic / Prague             | 2020-03-08 | Virus Research, Development and Application Centre, Erviny University | Gen Era Diagnostica Inc.                                     | Mein, Marie-Pierre Hayette, Vincent Bours |
| EPI_ISL_423466 | hCoV-19/Turkey/ERA00M-01/2020                | Europe / Turkey / Kayseri                    | 2020-03-17 | WHO National Influenza Centre Russian Federation                      | WHO National Influenza Centre Russian Federation             | Mein, Marie-Pierre Hayette, Vincent Bours |
| EPI_ISL_423707 | hCoV-19/Russia/Saint-Petersburg-RS41445/2020 | Europe / Russia / Saint-Petersburg           | 2020-03-20 | WHO National Influenza Centre Russian Federation                      | WHO National Influenza Centre Russian Federation             | Mein, Marie-Pierre Hayette, Vincent Bours |
| EPI_ISL_423708 | hCoV-19/Russia/Saint-Petersburg-RS43037/2020 | Europe / Russia / Saint-Petersburg           | 2020-03-24 | WHO National Influenza Centre Russian Federation                      | WHO National Influenza Centre Russian Federation             | Mein, Marie-Pierre Hayette, Vincent Bours |
| EPI_ISL_423709 | hCoV-19/Russia/Saint-Petersburg-RS43038/2020 | Europe / Russia / Saint-Petersburg           | 2020-03-24 | WHO National Influenza Centre Russian Federation                      | WHO National Influenza Centre Russian Federation             | Mein, Marie-Pierre Hayette, Vincent Bours |
| EPI_ISL_423710 | hCoV-19/Russia/Saint-Petersburg-RS4384/2020  | Europe / Russia / Saint-Petersburg           | 2020-03-29 | WHO National Influenza Centre Russian Federation                      | WHO National Influenza Centre Russian Federation             | Mein, Marie-Pierre Hayette, Vincent Bours |
| EPI_ISL_423711 | hCoV-19/Russia/Saint-Petersburg-RS4385/2020  | Europe / Russia / Saint-Petersburg           | 2020-03-29 | WHO National Influenza Centre Russian Federation                      | WHO National Influenza Centre Russian Federation             | Mein, Marie-Pierre Hayette, Vincent Bours |
| EPI_ISL_423712 | hCoV-19/Russia/Saint-Petersburg-RS4546/2020  | Europe / Russia / Saint-Petersburg           | 2020-04-02 | WHO National Influenza Centre Russian Federation                      | WHO National Influenza Centre Russian Federation             | Mein, Marie-Pierre Hayette, Vincent Bours |
| EPI_ISL_423713 | hCoV-19/Russia/Ulan-Ude-RS4665/2020          | Europe / Russia / Buryat Republic / Ulan-Ude | 2020-04-05 | WHO National Influenza Centre Russian Federation                      | WHO National Influenza Centre Russian Federation             | Mein, Marie-Pierre Hayette, Vincent Bours |
| EPI_ISL_423714 | hCoV-19/Russia/Saint-Petersburg-RS4675/2020  | Europe / Russia / Saint-Petersburg           | 2020-04-04 | WHO National Influenza Centre Russian Federation                      | WHO National Influenza Centre Russian Federation             | Mein, Marie-Pierre Hayette, Vincent Bours |
| EPI_ISL_423720 | hCoV-19/Russia/Saint-Petersburg-RS4675/2020  | Europe / Russia / Saint-Petersburg           | 2020-04-05 | WHO National Influenza Centre Russian Federation                      | WHO National Influenza Centre Russian Federation             | Mein, Marie-Pierre Hayette, Vincent Bours |
| EPI_ISL_423721 | hCoV-19/Russia/Saint-Petersburg-RS4685/2020  | Europe / Russia / Saint-Petersburg           | 2020-04-05 | WHO National Influenza Centre Russian Federation                      | WHO National Influenza Centre Russian Federation             | Mein, Marie-Pierre Hayette, Vincent Bours |
| EPI_ISL_423722 | hCoV-19/Russia/Saint-Petersburg-RS4685/2020  | Europe / Russia / Saint-Petersburg           | 2020-04-05 | WHO National Influenza Centre Russian Federation                      | WHO National Influenza Centre Russian Federation             | Mein, Marie-Pierre Hayette, Vincent Bours |
| EPI_ISL_423723 | hCoV-19/Russia/Saint-Petersburg-RS4678/2020  | Europe / Russia / Saint-Petersburg           | 2020-04-06 | WHO National Influenza Centre Russian Federation                      | WHO National Influenza Centre Russian Federation             | Mein, Marie-Pierre Hayette, Vincent Bours |
| EPI_ISL_423724 | hCoV-19/Russia/Saint-Petersburg-RS4685/2020  | Europe / Russia / Saint-Petersburg           | 2020-04-05 | WHO National Influenza Centre Russian Federation                      | WHO National Influenza Centre Russian Federation             | Mein, Marie-Pierre Hayette, Vincent Bours |
| EPI_ISL_423725 | hCoV-19/Russia/Saint-Petersburg-RS4685/2020  | Europe / Russia / Saint-Petersburg           | 2020-04-05 | WHO National Influenza Centre Russian Federation                      | WHO National Influenza Centre Russian Federation             | Mein, Marie-Pierre Hayette, Vincent Bours |
| EPI_ISL_423726 | hCoV-19/Russia/Saint-Petersburg-RS4685/2020  | Europe / Russia / Saint-Petersburg           | 2020-04-05 | WHO National Influenza Centre Russian Federation                      | WHO National Influenza Centre Russian Federation             | Mein, Marie-Pierre Hayette, Vincent Bours |
| EPI_ISL_423727 | hCoV-19/Russia/Saint-Petersburg-RS4685/2020  | Europe / Russia / Saint-Petersburg           | 2020-04-05 | WHO National Influenza Centre Russian Federation                      | WHO National Influenza Centre Russian Federation             | Mein, Marie-Pierre Hayette, Vincent Bours |
| EPI_ISL_423728 | hCoV-19/Russia/Saint-Petersburg-RS4685/2020  | Europe / Russia / Saint-Petersburg           | 2020-04-05 | WHO National Influenza Centre Russian Federation                      | WHO National Influenza Centre Russian Federation             | Mein, Marie-Pierre Hayette, Vincent Bours |
| EPI_ISL_423729 | hCoV-19/Russia/Saint-Petersburg-RS4685/2020  | Europe / Russia / Saint-Petersburg           | 2020-04-05 | WHO National Influenza Centre Russian Federation                      | WHO National Influenza Centre Russian Federation             | Mein, Marie-Pierre Hayette, Vincent Bours |
| EPI_ISL_423730 | hCoV-19/Russia/Saint-Petersburg-RS4685/2020  | Europe / Russia / Saint-Petersburg           | 2020-04-05 | WHO National Influenza Centre Russian Federation                      | WHO National Influenza Centre Russian Federation             | Mein, Marie-Pierre Hayette, Vincent Bours |
| EPI_ISL_423731 | hCoV-19/Russia/Saint-Petersburg-RS4685/2020  | Europe / Russia / Saint-Petersburg           | 2020-04-05 | WHO National Influenza Centre Russian Federation                      | WHO National Influenza Centre Russian Federation             | Mein, Marie-Pierre Hayette, Vincent Bours |
| EPI_ISL_423732 | hCoV-19/Russia/Saint-Petersburg-RS4685/2020  | Europe / Russia / Saint-Petersburg           | 2020-04-05 | WHO National Influenza Centre Russian Federation                      | WHO National Influenza Centre Russian Federation             | Mein, Marie-Pierre Hayette, Vincent Bours |
| EPI_ISL_423733 | hCoV-19/Russia/Saint-Petersburg-RS4685/2020  | Europe / Russia / Saint-Petersburg           | 2020-04-05 | WHO National Influenza Centre Russian Federation                      | WHO National Influenza Centre Russian Federation             | Mein, Marie-Pierre Hayette, Vincent Bours |
| EPI_ISL_423734 | hCoV-19/Belgium/ULG-10019/2020               | Europe / Belgium / Liege                     | 2020-03-31 | Department of Clinical Microbiology                                   | GIGA Medical Genomics                                        | Mein, Marie-Pierre Hayette, Vincent Bours |
| EPI_ISL_423747 | hCoV-19/Belgium/ULG-10041/2020               | Europe / Belgium / Liege                     | 2020-03-31 | Department of Clinical Microbiology                                   | GIGA Medical Genomics                                        | Mein, Marie-Pierre Hayette, Vincent Bours |
| EPI_ISL_423748 | hCoV-19/Belgium/ULG-10097/2020               | Europe / Belgium / Liege                     | 2020-04-06 | Department of Clinical Microbiology                                   | GIGA Medical Genomics                                        | Mein, Marie-Pierre Hayette, Vincent Bours |
| EPI_ISL_423749 | hCoV-19/Belgium/ULG-10098/2020               | Europe / Belgium / Liege                     | 2020-04-06 | Department of Clinical Microbiology                                   | GIGA Medical Genomics                                        | Mein, Marie-Pierre Hayette, Vincent Bours |
| EPI_ISL_423750 | hCoV-19/Belgium/ULG-10099/2020               | Europe / Belgium / Liege                     | 2020-04-06 | Department of Clinical Microbiology                                   | GIGA Medical Genomics                                        | Mein, Marie-Pierre Hayette, Vincent Bours |
| EPI_ISL_423751 | hCoV-19/Belgium/ULG-10100/2020               | Europe / Belgium / Liege                     | 2020-04-07 | Department of Clinical Microbiology                                   | GIGA Medical Genomics                                        | Mein, Marie-Pierre Hayette, Vincent Bours |
| EPI_ISL_423752 | hCoV-19/Belgium/ULG-10101/2020               | Europe / Belgium / Liege                     | 2020-04-06 | Department of Clinical Microbiology                                   | GIGA Medical Genomics                                        | Mein, Marie-Pierre Hayette, Vincent Bours |
| EPI_ISL_423753 | hCoV-19/Belgium/ULG-10102/2020               | Europe / Belgium / Liege                     | 2020-04-06 | Department of Clinical Microbiology                                   | GIGA Medical Genomics                                        | Mein, Marie-Pierre Hayette, Vincent Bours |
| EPI_ISL_423754 | hCoV-19/Belgium/ULG-10103/2020               | Europe / Belgium / Liege                     | 2020-04-06 | Department of Clinical Microbiology                                   | GIGA Medical Genomics                                        | Mein, Marie-Pierre Hayette, Vincent Bours |
| EPI_ISL_423755 | hCoV-19/Belgium/ULG-10104/2020               | Europe / Belgium / Liege                     | 2020-04-06 | Department of Clinical Microbiology                                   | GIGA Medical Genomics                                        | Mein, Marie-Pierre Hayette, Vincent Bours |
| EPI_ISL_423756 | hCoV-19/Belgium/ULG-10105/2020               | Europe / Belgium / Liege                     | 2020-04-06 | Department of Clinical Microbiology                                   | GIGA Medical Genomics                                        | Mein, Marie-Pierre Hayette, Vincent Bours |
| EPI_ISL_423757 | hCoV-19/Belgium/ULG-10106/2020               | Europe / Belgium / Liege                     | 2020-04-07 | Department of Clinical Microbiology                                   | GIGA Medical Genomics                                        | Mein, Marie-Pierre Hayette, Vincent Bours |
| EPI_ISL_423758 | hCoV-19/Belgium/ULG-10107/2020               | Europe / Belgium / Liege                     | 2020-04-06 | Department of Clinical Microbiology                                   | GIGA Medical Genomics                                        | Mein, Marie-Pierre Hayette, Vincent Bours |
| EPI_ISL_423759 | hCoV-19/Belgium/ULG-10108/2020               | Europe / Belgium / Liege                     | 2020-04-06 | Department of Clinical Microbiology                                   | GIGA Medical Genomics                                        | Mein, Marie-Pierre Hayette, Vincent Bours |
| EPI_ISL_423760 | hCoV-19/Belgium/ULG-10109/2020               | Europe / Belgium / Liege                     | 2020-04-07 | Department of Clinical Microbiology                                   | GIGA Medical Genomics                                        | Mein, Marie-Pierre Hayette, Vincent Bours |
| EPI_ISL_423761 | hCoV-19/Belgium/ULG-10111/2020               | Europe / Belgium / Liege                     | 2020-04-07 | Department of Clinical Microbiology                                   | GIGA Medical Genomics                                        | Mein, Marie-Pierre Hayette, Vincent Bours |
| EPI_ISL_423762 | hCoV-19/Belgium/ULG-10112/2020               | Europe / Belgium / Liege                     | 2020-04-06 | Department of Clinical Microbiology                                   | GIGA Medical Genomics                                        | Mein, Marie-Pierre Hayette, Vincent Bours |
| EPI_ISL_423763 | hCoV-19/Belgium/ULG-10114/2020               | Europe / Belgium / Liege                     | 2020-04-07 | Department of Clinical Microbiology                                   | GIGA Medical Genomics                                        | Mein, Marie-Pierre Hayette, Vincent Bours |
| EPI_ISL_423764 | hCoV-19/Belgium/ULG-10115/2020               | Europe / Belgium / Liege                     | 2020-04-07 | Department of Clinical Microbiology                                   | GIGA Medical Genomics                                        | Mein, Marie-Pierre Hayette, Vincent Bours |
| EPI_ISL_423765 | hCoV-19/Belgium/ULG-10117/2020               | Europe / Belgium / Liege                     | 2020-04-07 | Department of Clinical Microbiology                                   | GIGA Medical Genomics                                        | Mein, Marie-Pierre Hayette, Vincent Bours |
| EPI_ISL_423766 | hCoV-19/Belgium/ULG-10118/2020               | Europe / Belgium / Liege                     | 2020-04-07 | Department of Clinical Microbiology                                   | GIGA Medical Genomics                                        | Mein, Marie-Pierre Hayette, Vincent Bours |
| EPI_ISL_423767 | hCoV-19/Belgium/ULG-10119/2020               | Europe / Belgium / Liege                     | 2020-04-07 | Department of Clinical Microbiology                                   | GIGA Medical Genomics                                        | Mein, Marie-Pierre Hayette, Vincent Bours |
| EPI_ISL_423768 | hCoV-19/Belgium/ULG-10120/2020               | Europe / Belgium / Liege                     | 2020-04-07 | Department of Clinical Microbiology                                   | GIGA Medical Genomics                                        | Mein, Marie-Pierre Hayette, Vincent Bours |
| EPI_ISL_423769 | hCoV-19/Belgium/ULG-10121/2020               | Europe / Belgium / Liege                     | 2020-04-07 | Department of Clinical Microbiology                                   | GIGA Medical Genomics                                        | Mein, Marie-Pierre Hayette, Vincent Bours |
| EPI_ISL_423770 | hCoV-19/Belgium/ULG-10122/2020               | Europe / Belgium / Liege                     | 2020-04-07 | Department of Clinical Microbiology                                   | GIGA Medical Genomics                                        | Mein, Marie-Pierre Hayette, Vincent Bours |
| EPI_ISL_423771 | hCoV-19/Belgium/ULG-10124/2020               | Europe / Belgium / Liege                     | 2020-04-07 | Department of Clinical Microbiology                                   | GIGA Medical Genomics                                        | Mein, Marie-Pierre Hayette, Vincent Bours |
| EPI_ISL_423772 | hCoV-19/Belgium/ULG-10126/2020               | Europe / Belgium / Liege                     | 2020-04-07 | Department of Clinical Microbiology                                   | GIGA Medical Genomics                                        | Mein, Marie-Pierre Hayette, Vincent Bours |
| EPI_ISL_423773 | hCoV-19/Belgium/ULG-10127/2020               | Europe / Belgium / Liege                     | 2020-04-07 | Department of Clinical Microbiology                                   | GIGA Medical Genomics                                        | Mein, Marie-Pierre Hayette, Vincent Bours |
| EPI_ISL_423774 | hCoV-19/Belgium/ULG-10128/2020               | Europe / Belgium / Liege                     | 2020-04-07 | Department of Clinical Microbiology                                   | GIGA Medical Genomics                                        | Mein, Marie-Pierre Hayette, Vincent Bours |
| EPI_ISL_423775 | hCoV-19/Belgium/ULG-10130/2020               | Europe / Belgium / Liege                     | 2020-04-07 | Department of Clinical Microbiology                                   | GIGA Medical Genomics                                        | Mein, Marie-Pierre Hayette, Vincent Bours |
| EPI_ISL_423776 | hCoV-19/Belgium/ULG-10131/2020               | Europe / Belgium / Liege                     | 2020-04-07 | Department of Clinical Microbiology                                   | GIGA Medical Genomics                                        | Mein, Marie-Pierre Hayette, Vincent Bours |
| EPI_ISL_423777 | hCoV-19/Belgium/ULG-10132/2020               | Europe / Belgium / Liege                     | 2020-04-07 | Department of Clinical Microbiology                                   | GIGA Medical Genomics                                        | Mein, Marie-Pierre Hayette, Vincent Bours |
| EPI_ISL_423778 | hCoV-19/Belgium/ULG-10133/2020               | Europe / Belgium / Liege                     | 2020-04-07 | Department of Clinical Microbiology                                   | GIGA Medical Genomics                                        | Mein, Marie-Pierre Hayette, Vincent Bours |
| EPI_ISL_423779 | hCoV-19/Belgium/ULG-10134/2020               | Europe / Belgium / Liege                     | 2020-04-08 | Department of Clinical Microbiology                                   | GIGA Medical Genomics                                        | Mein, Marie-Pierre Hayette, Vincent Bours |
| EPI_ISL_423780 | hCoV-19/Belgium/ULG-10135/2020               | Europe / Belgium / Liege                     | 2020-04-08 | Department of Clinical Microbiology                                   | GIGA Medical Genomics                                        | Mein, Marie-Pierre Hayette, Vincent Bours |
| EPI_ISL_423781 | hCoV-19/Belgium/ULG-10136/2020               | Europe / Belgium / Liege                     | 2020-04-08 | Department of Clinical Microbiology                                   | GIGA Medical Genomics                                        | Mein, Marie-Pierre Hayette, Vincent Bours |
| EPI_ISL_423782 | hCoV-19/Belgium/ULG-10137/2020               | Europe / Belgium / Liege                     | 2020-04-08 | Department of Clinical Microbiology                                   | GIGA Medical Genomics                                        | Mein, Marie-Pierre Hayette, Vincent Bours |
| EPI_ISL_423783 | hCoV-19/Belgium/ULG-10138/2020               | Europe / Belgium / Liege                     | 2020-04-08 | Department of Clinical Microbiology                                   | GIGA Medical Genomics                                        | Mein, Marie-Pierre Hayette, Vincent Bours |
| EPI_ISL_423784 | hCoV-19/Belgium/ULG-10139/2020               | Europe / Belgium / Liege                     | 2020-04-08 | Department of Clinical Microbiology                                   | GIGA Medical Genomics                                        | Mein, Marie-Pierre Hayette, Vincent Bours |
| EPI_ISL_423785 | hCoV-19/Belgium/ULG-10142/2020               | Europe / Belgium / Liege                     | 2020-04-08 | Department of Clinical Microbiology                                   | GIGA Medical Genomics                                        | Mein, Marie-Pierre Hayette, Vincent Bours |
| EPI_ISL_423786 | hCoV-19/Belgium/ULG-10141/2020               | Europe / Belgium / Liege                     | 2020-04-08 | Department of Clinical Microbiology                                   | GIGA Medical Genomics                                        | Mein, Marie-Pierre Hayette, Vincent Bours |

|                |                                          |                                             |            |                                                                                        |                                                                                        |                                                                                                                                                           |
|----------------|------------------------------------------|---------------------------------------------|------------|----------------------------------------------------------------------------------------|----------------------------------------------------------------------------------------|-----------------------------------------------------------------------------------------------------------------------------------------------------------|
| EPI_ISL_427388 | hCoV-19/Beijing/ULG-10143/2020           | Europe / Belgium / Liege                    | 2020-04-07 | Department of Clinical Microbiology                                                    | GIGA Medical Genomics                                                                  | Keith Durkin, Maria Arlet, Sébastien Bontems, Raphaël Boreux, Cécile Meers, Pierrette Melin, Marie-Pierre Hayette, Vincent Bours                          |
| EPI_ISL_427388 | hCoV-19/Beijing/ULG-10144/2020           | Europe / Belgium / Liege                    | 2020-04-07 | Department of Clinical Microbiology                                                    | GIGA Medical Genomics                                                                  | Keith Durkin, Maria Arlet, Sébastien Bontems, Raphaël Boreux, Cécile Meers, Pierrette Melin, Marie-Pierre Hayette, Vincent Bours                          |
| EPI_ISL_427390 | hCoV-19/Beijing/ULG-10125/2020           | Europe / Belgium / Liege                    | 2020-04-07 | Department of Clinical Microbiology                                                    | GIGA Medical Genomics                                                                  | Keith Durkin, Maria Arlet, Sébastien Bontems, Raphaël Boreux, Cécile Meers, Pierrette Melin, Marie-Pierre Hayette, Vincent Bours                          |
| EPI_ISL_427391 | hCoV-19/Turkey/IGAB-COV008/2020          | Europe / Turkey / Istanbul                  | 2020-04-13 | Genomic Laboratory (GLAB), Istanbul Technical University                               | Genomic Laboratory (GLAB), Istanbul Technical University                               | Artem Komissarov, Artem Faderm, Maria Sergeeva, Anna Ivanova, Daria Danilenko                                                                             |
| EPI_ISL_428670 | hCoV-19/Sri Lanka/CoV53/2020             | Asia / Sri Lanka                            | 2020-03-16 | Centre for Dengue Research                                                             | Centre for Dengue Research                                                             | Chandima Jeevaratne, Dinuka Ariyaratne, Lakshmi Gomes, Deshani Jayatilaka, Ananda Wijewickrama, Eranga Nanayakkara, Damarayanti Iampalya, Neelika Malaise |
| EPI_ISL_428671 | hCoV-19/Sri Lanka/CoV53/2020             | Asia / Sri Lanka                            | 2020-03-10 | Centre for Dengue Research                                                             | Centre for Dengue Research                                                             | Chandima Jeevaratne, Dinuka Ariyaratne, Lakshmi Gomes, Deshani Jayatilaka, Ananda Wijewickrama, Eranga Nanayakkara, Damarayanti Iampalya, Neelika Malaise |
| EPI_ISL_428672 | hCoV-19/Sri Lanka/CoV51/2020             | Asia / Sri Lanka                            | 2020-03-19 | Centre for Dengue Research                                                             | Centre for Dengue Research                                                             | Chandima Jeevaratne, Dinuka Ariyaratne, Lakshmi Gomes, Deshani Jayatilaka, Ananda Wijewickrama, Eranga Nanayakkara, Damarayanti Iampalya, Neelika Malaise |
| EPI_ISL_428673 | hCoV-19/Sri Lanka/CoV486/2020            | Asia / Sri Lanka                            | 2020-03-31 | Centre for Dengue Research                                                             | Centre for Dengue Research                                                             | Chandima Jeevaratne, Dinuka Ariyaratne, Lakshmi Gomes, Deshani Jayatilaka, Ananda Wijewickrama, Eranga Nanayakkara, Damarayanti Iampalya, Neelika Malaise |
| EPI_ISL_429256 | hCoV-19/Spain/Vicente01/2020             | Europe / Spain / Madrid                     | 2020-03-12 | Centre for Dengue Research                                                             | Centre for Dengue Research                                                             | Chandima Jeevaratne, Dinuka Ariyaratne, Lakshmi Gomes, Deshani Jayatilaka, Ananda Wijewickrama, Eranga Nanayakkara, Damarayanti Iampalya, Neelika Malaise |
| EPI_ISL_429668 | hCoV-19/France/HF4163/2020               | Europe / France / Hauts de France / Con     | 2020-02-21 | Centre Hospitalier Compuligne Laboratoire de Biologie                                  | National Reference Center for Viruses of Respiratory                                   | Joaquin Mendocso, Almudena Lopez, Pablo Mendocso                                                                                                          |
| EPI_ISL_430070 | hCoV-19/Russia/SPPetersburg/R149175/2020 | Europe / Russia / St Petersburg             | 2020-04-07 | WHO National Influenza Centre Russian Federation                                       | WHO National Influenza Centre Russian Federation                                       | Alina Danelenko, Maria Sergeeva, Anna Ivanova, Daria Danilenko                                                                                            |
| EPI_ISL_430071 | hCoV-19/Russia/SPPetersburg/R149365/2020 | Europe / Russia / St Petersburg             | 2020-04-08 | WHO National Influenza Centre Russian Federation                                       | WHO National Influenza Centre Russian Federation                                       | Alina Danelenko, Maria Sergeeva, Anna Ivanova, Daria Danilenko                                                                                            |
| EPI_ISL_430072 | hCoV-19/Russia/SPPetersburg/R149375/2020 | Europe / Russia / St Petersburg             | 2020-04-08 | WHO National Influenza Centre Russian Federation                                       | WHO National Influenza Centre Russian Federation                                       | Alina Danelenko, Maria Sergeeva, Anna Ivanova, Daria Danilenko                                                                                            |
| EPI_ISL_430073 | hCoV-19/Russia/SPPetersburg/R149385/2020 | Europe / Russia / St Petersburg             | 2020-04-08 | WHO National Influenza Centre Russian Federation                                       | WHO National Influenza Centre Russian Federation                                       | Alina Danelenko, Maria Sergeeva, Anna Ivanova, Daria Danilenko                                                                                            |
| EPI_ISL_430074 | hCoV-19/Russia/SPPetersburg/R149445/2020 | Europe / Russia / St Petersburg             | 2020-04-08 | WHO National Influenza Centre Russian Federation                                       | WHO National Influenza Centre Russian Federation                                       | Alina Danelenko, Maria Sergeeva, Anna Ivanova, Daria Danilenko                                                                                            |
| EPI_ISL_430075 | hCoV-19/Russia/SPPetersburg/R149495/2020 | Europe / Russia / St Petersburg             | 2020-04-09 | WHO National Influenza Centre Russian Federation                                       | WHO National Influenza Centre Russian Federation                                       | Alina Danelenko, Maria Sergeeva, Anna Ivanova, Daria Danilenko                                                                                            |
| EPI_ISL_430084 | hCoV-19/Russia/SPPetersburg/R15017/2020  | Europe / Russia / St Petersburg             | 2020-04-09 | WHO National Influenza Centre Russian Federation                                       | WHO National Influenza Centre Russian Federation                                       | Alina Danelenko, Maria Sergeeva, Anna Ivanova, Daria Danilenko                                                                                            |
| EPI_ISL_430100 | hCoV-19/Russia/SPPetersburg/R160275/2020 | Europe / Russia / St Petersburg             | 2020-04-14 | WHO National Influenza Centre Russian Federation                                       | WHO National Influenza Centre Russian Federation                                       | Alina Danelenko, Maria Sergeeva, Anna Ivanova, Daria Danilenko                                                                                            |
| EPI_ISL_430101 | hCoV-19/Russia/SPPetersburg/R160315/2020 | Europe / Russia / St Petersburg             | 2020-04-14 | WHO National Influenza Centre Russian Federation                                       | WHO National Influenza Centre Russian Federation                                       | Alina Danelenko, Maria Sergeeva, Anna Ivanova, Daria Danilenko                                                                                            |
| EPI_ISL_430102 | hCoV-19/Russia/SPPetersburg/R160355/2020 | Europe / Russia / St Petersburg             | 2020-04-14 | WHO National Influenza Centre Russian Federation                                       | WHO National Influenza Centre Russian Federation                                       | Alina Danelenko, Maria Sergeeva, Anna Ivanova, Daria Danilenko                                                                                            |
| EPI_ISL_430103 | hCoV-19/Russia/SPPetersburg/R160435/2020 | Europe / Russia / St Petersburg             | 2020-04-14 | WHO National Influenza Centre Russian Federation                                       | WHO National Influenza Centre Russian Federation                                       | Alina Danelenko, Maria Sergeeva, Anna Ivanova, Daria Danilenko                                                                                            |
| EPI_ISL_430104 | hCoV-19/Russia/SPPetersburg/R160533/2020 | Europe / Russia / St Petersburg             | 2020-04-15 | WHO National Influenza Centre Russian Federation                                       | WHO National Influenza Centre Russian Federation                                       | Alina Danelenko, Maria Sergeeva, Anna Ivanova, Daria Danilenko                                                                                            |
| EPI_ISL_430105 | hCoV-19/Russia/SPPetersburg/R160555/2020 | Europe / Russia / St Petersburg             | 2020-04-15 | WHO National Influenza Centre Russian Federation                                       | WHO National Influenza Centre Russian Federation                                       | Alina Danelenko, Maria Sergeeva, Anna Ivanova, Daria Danilenko                                                                                            |
| EPI_ISL_430106 | hCoV-19/Russia/SPPetersburg/R160565/2020 | Europe / Russia / St Petersburg             | 2020-04-15 | WHO National Influenza Centre Russian Federation                                       | WHO National Influenza Centre Russian Federation                                       | Alina Danelenko, Maria Sergeeva, Anna Ivanova, Daria Danilenko                                                                                            |
| EPI_ISL_430107 | hCoV-19/Russia/SPPetersburg/R160575/2020 | Europe / Russia / St Petersburg             | 2020-04-15 | WHO National Influenza Centre Russian Federation                                       | WHO National Influenza Centre Russian Federation                                       | Alina Danelenko, Maria Sergeeva, Anna Ivanova, Daria Danilenko                                                                                            |
| EPI_ISL_430108 | hCoV-19/Russia/SPPetersburg/R160615/2020 | Europe / Russia / St Petersburg             | 2020-04-15 | WHO National Influenza Centre Russian Federation                                       | WHO National Influenza Centre Russian Federation                                       | Alina Danelenko, Maria Sergeeva, Anna Ivanova, Daria Danilenko                                                                                            |
| EPI_ISL_430109 | hCoV-19/Russia/SPPetersburg/R160635/2020 | Europe / Russia / St Petersburg             | 2020-04-15 | WHO National Influenza Centre Russian Federation                                       | WHO National Influenza Centre Russian Federation                                       | Alina Danelenko, Maria Sergeeva, Anna Ivanova, Daria Danilenko                                                                                            |
| EPI_ISL_430110 | hCoV-19/Russia/SPPetersburg/R160655/2020 | Europe / Russia / St Petersburg             | 2020-04-15 | WHO National Influenza Centre Russian Federation                                       | WHO National Influenza Centre Russian Federation                                       | Alina Danelenko, Maria Sergeeva, Anna Ivanova, Daria Danilenko                                                                                            |
| EPI_ISL_430111 | hCoV-19/Russia/SPPetersburg/R160655/2020 | Europe / Russia / St Petersburg             | 2020-04-15 | WHO National Influenza Centre Russian Federation                                       | WHO National Influenza Centre Russian Federation                                       | Alina Danelenko, Maria Sergeeva, Anna Ivanova, Daria Danilenko                                                                                            |
| EPI_ISL_430112 | hCoV-19/Russia/Use-Use-R16565/2020       | Europe / Russia / Russian Federation / Ulan | 2020-03-25 | WHO National Influenza Centre Russian Federation                                       | WHO National Influenza Centre Russian Federation                                       | Alina Danelenko, Maria Sergeeva, Anna Ivanova, Daria Danilenko                                                                                            |
| EPI_ISL_430297 | hCoV-19/South Africa/R102827/2020        | Africa / South Africa / GP                  | 2020-03-08 | National Institute for Communicable Diseases of the National Health Laboratory Service | National Institute for Communicable Diseases of the National Health Laboratory Service | Alina Danelenko, Maria Sergeeva, Anna Ivanova, Daria Danilenko                                                                                            |
| EPI_ISL_430730 | hCoV-19/Beijing/GJ390/2020               | Asia / China / Beijing                      | 2020-01-31 | Chinese PLA Institute for Disease Control and Prevention                               | Chinese PLA Institute for Disease Control and Prevention                               | Peng Li, Jinhui Li, Lihong Li                                                                                                                             |
| EPI_ISL_430731 | hCoV-19/Beijing/GJ391/2020               | Asia / China / Beijing                      | 2020-02-04 | Chinese PLA Institute for Disease Control and Prevention                               | Chinese PLA Institute for Disease Control and Prevention                               | Peng Li, Jinhui Li, Lihong Li                                                                                                                             |
| EPI_ISL_430732 | hCoV-19/Beijing/GJ392/2020               | Asia / China / Beijing                      | 2020-02-04 | Chinese PLA Institute for Disease Control and Prevention                               | Chinese PLA Institute for Disease Control and Prevention                               | Peng Li, Jinhui Li, Lihong Li                                                                                                                             |
| EPI_ISL_430733 | hCoV-19/Beijing/GJ393/2020               | Asia / China / Beijing                      | 2020-02-04 | Chinese PLA Institute for Disease Control and Prevention                               | Chinese PLA Institute for Disease Control and Prevention                               | Peng Li, Jinhui Li, Lihong Li                                                                                                                             |
| EPI_ISL_430734 | hCoV-19/Beijing/GJ394/2020               | Asia / China / Beijing                      | 2020-02-04 | Chinese PLA Institute for Disease Control and Prevention                               | Chinese PLA Institute for Disease Control and Prevention                               | Peng Li, Jinhui Li, Lihong Li                                                                                                                             |
| EPI_ISL_430735 | hCoV-19/Beijing/GJ395/2020               | Asia / China / Beijing                      | 2020-02-04 | Chinese PLA Institute for Disease Control and Prevention                               | Chinese PLA Institute for Disease Control and Prevention                               | Peng Li, Jinhui Li, Lihong Li                                                                                                                             |
| EPI_ISL_430736 | hCoV-19/Beijing/GJ396/2020               | Asia / China / Beijing                      | 2020-02-04 | Chinese PLA Institute for Disease Control and Prevention                               | Chinese PLA Institute for Disease Control and Prevention                               | Peng Li, Jinhui Li, Lihong Li                                                                                                                             |
| EPI_ISL_430737 | hCoV-19/Beijing/GJ397/2020               | Asia / China / Beijing                      | 2020-02-04 | Chinese PLA Institute for Disease Control and Prevention                               | Chinese PLA Institute for Disease Control and Prevention                               | Peng Li, Jinhui Li, Lihong Li                                                                                                                             |
| EPI_ISL_430738 | hCoV-19/Beijing/GJ398/2020               | Asia / China / Beijing                      | 2020-02-04 | Chinese PLA Institute for Disease Control and Prevention                               | Chinese PLA Institute for Disease Control and Prevention                               | Peng Li, Jinhui Li, Lihong Li                                                                                                                             |
| EPI_ISL_430739 | hCoV-19/Beijing/GJ399/2020               | Asia / China / Beijing                      | 2020-02-04 | Chinese PLA Institute for Disease Control and Prevention                               | Chinese PLA Institute for Disease Control and Prevention                               | Peng Li, Jinhui Li, Lihong Li                                                                                                                             |
| EPI_ISL_430740 | hCoV-19/Beijing/GJ400/2020               | Asia / China / Beijing                      | 2020-02-04 | Chinese PLA Institute for Disease Control and Prevention                               | Chinese PLA Institute for Disease Control and Prevention                               | Peng Li, Jinhui Li, Lihong Li                                                                                                                             |
| EPI_ISL_430741 | hCoV-19/Beijing/GJ401/2020               | Asia / China / Beijing                      | 2020-02-04 | Chinese PLA Institute for Disease Control and Prevention                               | Chinese PLA Institute for Disease Control and Prevention                               | Peng Li, Jinhui Li, Lihong Li                                                                                                                             |
| EPI_ISL_430742 | hCoV-19/Beijing/GJ402/2020               | Asia / China / Beijing                      | 2020-02-04 | Chinese PLA Institute for Disease Control and Prevention                               | Chinese PLA Institute for Disease Control and Prevention                               | Peng Li, Jinhui Li, Lihong Li                                                                                                                             |
| EPI_ISL_430743 | hCoV-19/Beijing/GJ403/2020               | Asia / China / Beijing                      | 2020-02-04 | Chinese PLA Institute for Disease Control and Prevention                               | Chinese PLA Institute for Disease Control and Prevention                               | Peng Li, Jinhui Li, Lihong Li                                                                                                                             |
| EPI_ISL_430744 | hCoV-19/Beijing/GJ404/2020               | Asia / China / Beijing                      | 2020-02-04 | Chinese PLA Institute for Disease Control and Prevention                               | Chinese PLA Institute for Disease Control and Prevention                               | Peng Li, Jinhui Li, Lihong Li                                                                                                                             |
| EPI_ISL_430745 | hCoV-19/Beijing/GJ405/2020               | Asia / China / Beijing                      | 2020-02-04 | Chinese PLA Institute for Disease Control and Prevention                               | Chinese PLA Institute for Disease Control and Prevention                               | Peng Li, Jinhui Li, Lihong Li                                                                                                                             |
| EPI_ISL_430746 | hCoV-19/Beijing/GJ406/2020               | Asia / China / Beijing                      | 2020-02-04 | Chinese PLA Institute for Disease Control and Prevention                               | Chinese PLA Institute for Disease Control and Prevention                               | Peng Li, Jinhui Li, Lihong Li                                                                                                                             |
| EPI_ISL_430747 | hCoV-19/Beijing/GJ407/2020               | Asia / China / Beijing                      | 2020-02-04 | Chinese PLA Institute for Disease Control and Prevention                               | Chinese PLA Institute for Disease Control and Prevention                               | Peng Li, Jinhui Li, Lihong Li                                                                                                                             |
| EPI_ISL_430748 | hCoV-19/Beijing/GJ408/2020               | Asia / China / Beijing                      | 2020-02-04 | Chinese PLA Institute for Disease Control and Prevention                               | Chinese PLA Institute for Disease Control and Prevention                               | Peng Li, Jinhui Li, Lihong Li                                                                                                                             |
| EPI_ISL_430749 | hCoV-19/Beijing/GJ409/2020               | Asia / China / Beijing                      | 2020-02-04 | Chinese PLA Institute for Disease Control and Prevention                               | Chinese PLA Institute for Disease Control and Prevention                               | Peng Li, Jinhui Li, Lihong Li                                                                                                                             |
| EPI_ISL_430750 | hCoV-19/Beijing/GJ410/2020               | Asia / China / Beijing                      | 2020-02-04 | Chinese PLA Institute for Disease Control and Prevention                               | Chinese PLA Institute for Disease Control and Prevention                               | Peng Li, Jinhui Li, Lihong Li                                                                                                                             |
| EPI_ISL_430751 | hCoV-19/Beijing/GJ411/2020               | Asia / China / Beijing                      | 2020-02-04 | Chinese PLA Institute for Disease Control and Prevention                               | Chinese PLA Institute for Disease Control and Prevention                               | Peng Li, Jinhui Li, Lihong Li                                                                                                                             |
| EPI_ISL_430752 | hCoV-19/Beijing/GJ412/2020               | Asia / China / Beijing                      | 2020-02-04 | Chinese PLA Institute for Disease Control and Prevention                               | Chinese PLA Institute for Disease Control and Prevention                               | Peng Li, Jinhui Li, Lihong Li                                                                                                                             |
| EPI_ISL_430753 | hCoV-19/Beijing/GJ413/2020               | Asia / China / Beijing                      | 2020-02-04 | Chinese PLA Institute for Disease Control and Prevention                               | Chinese PLA Institute for Disease Control and Prevention                               | Peng Li, Jinhui Li, Lihong Li                                                                                                                             |
| EPI_ISL_430754 | hCoV-19/Beijing/GJ414/2020               | Asia / China / Beijing                      | 2020-02-04 | Chinese PLA Institute for Disease Control and Prevention                               | Chinese PLA Institute for Disease Control and Prevention                               | Peng Li, Jinhui Li, Lihong Li                                                                                                                             |
| EPI_ISL_430755 | hCoV-19/Beijing/GJ415/2020               | Asia / China / Beijing                      | 2020-02-04 | Chinese PLA Institute for Disease Control and Prevention                               | Chinese PLA Institute for Disease Control and Prevention                               | Peng Li, Jinhui Li, Lihong Li                                                                                                                             |
| EPI_ISL_430756 | hCoV-19/Beijing/GJ416/2020               | Asia / China / Beijing                      | 2020-02-04 | Chinese PLA Institute for Disease Control and Prevention                               | Chinese PLA Institute for Disease Control and Prevention                               | Peng Li, Jinhui Li, Lihong Li                                                                                                                             |
| EPI_ISL_430757 | hCoV-19/Beijing/GJ417/2020               | Asia / China / Beijing                      | 2020-02-04 | Chinese PLA Institute for Disease Control and Prevention                               | Chinese PLA Institute for Disease Control and Prevention                               | Peng Li, Jinhui Li, Lihong Li                                                                                                                             |
| EPI_ISL_430758 | hCoV-19/Beijing/GJ418/2020               | Asia / China / Beijing                      | 2020-02-04 | Chinese PLA Institute for Disease Control and Prevention                               | Chinese PLA Institute for Disease Control and Prevention                               | Peng Li, Jinhui Li, Lihong Li                                                                                                                             |
| EPI_ISL_430759 | hCoV-19/Beijing/GJ419/2020               | Asia / China / Beijing                      | 2020-02-04 | Chinese PLA Institute for Disease Control and Prevention                               | Chinese PLA Institute for Disease Control and Prevention                               | Peng Li, Jinhui Li, Lihong Li                                                                                                                             |
| EPI_ISL_430760 | hCoV-19/Beijing/GJ420/2020               | Asia / China / Beijing                      | 2020-02-04 | Chinese PLA Institute for Disease Control and Prevention                               | Chinese PLA Institute for Disease Control and Prevention                               | Peng Li, Jinhui Li, Lihong Li                                                                                                                             |
| EPI_ISL_430761 | hCoV-19/Beijing/GJ421/2020               | Asia / China / Beijing                      | 2020-02-04 | Chinese PLA Institute for Disease Control and Prevention                               | Chinese PLA Institute for Disease Control and Prevention                               | Peng Li, Jinhui Li, Lihong Li                                                                                                                             |
| EPI_ISL_430762 | hCoV-19/Beijing/GJ422/2020               | Asia / China / Beijing                      | 2020-02-04 | Chinese PLA Institute for Disease Control and Prevention                               | Chinese PLA Institute for Disease Control and Prevention                               | Peng Li, Jinhui Li, Lihong Li                                                                                                                             |
| EPI_ISL_430763 | hCoV-19/Beijing/GJ423/2020               | Asia / China / Beijing                      | 2020-02-04 | Chinese PLA Institute for Disease Control and Prevention                               | Chinese PLA Institute for Disease Control and Prevention                               | Peng Li, Jinhui Li, Lihong Li                                                                                                                             |
| EPI_ISL_430764 | hCoV-19/Beijing/GJ424/2020               | Asia / China / Beijing                      | 2020-02-04 | Chinese PLA Institute for Disease Control and Prevention                               | Chinese PLA Institute for Disease Control and Prevention                               | Peng Li, Jinhui Li, Lihong Li                                                                                                                             |
| EPI_ISL_430765 | hCoV-19/Beijing/GJ425/2020               | Asia / China / Beijing                      | 2020-02-04 | Chinese PLA Institute for Disease Control and Prevention                               | Chinese PLA Institute for Disease Control and Prevention                               | Peng Li, Jinhui Li, Lihong Li                                                                                                                             |
| EPI_ISL_430766 | hCoV-19/Beijing/GJ426/2020               | Asia / China / Beijing                      | 2020-02-04 | Chinese PLA Institute for Disease Control and Prevention                               | Chinese PLA Institute for Disease Control and Prevention                               | Peng Li, Jinhui Li, Lihong Li                                                                                                                             |
| EPI_ISL_430767 | hCoV-19/Beijing/GJ427/2020               | Asia / China / Beijing                      | 2020-02-04 | Chinese PLA Institute for Disease Control and Prevention                               | Chinese PLA Institute for Disease Control and Prevention                               | Peng Li, Jinhui Li, Lihong Li                                                                                                                             |
| EPI_ISL_430768 | hCoV-19/Beijing/GJ428/2020               | Asia / China / Beijing                      | 2020-02-04 | Chinese PLA Institute for Disease Control and Prevention                               | Chinese PLA Institute for Disease Control and Prevention                               | Peng Li, Jinhui Li, Lihong Li                                                                                                                             |
| EPI_ISL_430769 | hCoV-19/Beijing/GJ429/2020               | Asia / China / Beijing                      | 2020-02-04 | Chinese PLA Institute for Disease Control and Prevention                               | Chinese PLA Institute for Disease Control and Prevention                               | Peng Li, Jinhui Li, Lihong Li                                                                                                                             |
| EPI_ISL_430770 | hCoV-19/Beijing/GJ430/2020               | Asia / China / Beijing                      | 2020-02-04 | Chinese PLA Institute for Disease Control and Prevention                               | Chinese PLA Institute for Disease Control and Prevention                               | Peng Li, Jinhui Li, Lihong Li                                                                                                                             |
| EPI_ISL_430771 | hCoV-19/Beijing/GJ431/2020               | Asia / China / Beijing                      | 2020-02-04 | Chinese PLA Institute for Disease Control and Prevention                               | Chinese PLA Institute for Disease Control and Prevention                               | Peng Li, Jinhui Li, Lihong Li                                                                                                                             |
| EPI_ISL_430772 | hCoV-19/Beijing/GJ432/2020               | Asia / China / Beijing                      | 2020-02-04 | Chinese PLA Institute for Disease Control and Prevention                               | Chinese PLA Institute for Disease Control and Prevention                               | Peng Li, Jinhui Li, Lihong Li                                                                                                                             |
| EPI_ISL_430773 | hCoV-19/Beijing/GJ433/2020               | Asia / China / Beijing                      | 2020-02-04 | Chinese PLA Institute for Disease Control and Prevention                               | Chinese PLA Institute for Disease Control and Prevention                               | Peng Li, Jinhui Li, Lihong Li                                                                                                                             |
| EPI_ISL_430774 | hCoV-19/Beijing/GJ434/2020               | Asia / China / Beijing                      | 2020-02-04 | Chinese PLA Institute for Disease Control and Prevention                               | Chinese PLA Institute for Disease Control and Prevention                               | Peng Li, Jinhui Li, Lihong Li                                                                                                                             |
| EPI_ISL_430775 | hCoV-19/Beijing/GJ435/2020               | Asia / China / Beijing                      | 2020-02-04 | Chinese PLA Institute for Disease Control and Prevention                               | Chinese PLA Institute for Disease Control and Prevention                               | Peng Li, Jinhui Li, Lihong Li                                                                                                                             |
| EPI_ISL_430776 | hCoV-19/Beijing/GJ436/2020               | Asia / China / Beijing                      | 2020-02-04 | Chinese PLA Institute for Disease Control and Prevention                               | Chinese PLA Institute for Disease Control and Prevention                               | Peng Li, Jinhui Li, Lihong Li                                                                                                                             |
| EPI_ISL_430777 | hCoV-19/Beijing/GJ437/2020               | Asia / China / Beijing                      | 2020-02-04 | Chinese PLA Institute for Disease Control and Prevention                               | Chinese PLA Institute for Disease Control and Prevention                               | Peng Li, Jinhui Li, Lihong Li                                                                                                                             |
| EPI_ISL_430778 | hCoV-19/Beijing/GJ438/2020               | Asia / China / Beijing                      | 2020-02-04 | Chinese PLA Institute for Disease Control and Prevention                               | Chinese PLA Institute for Disease Control and Prevention                               | Peng Li, Jinhui Li, Lihong Li                                                                                                                             |
| EPI_ISL_430779 | hCoV-19/Beijing/GJ439/2020               | Asia / China / Beijing                      | 2020-02-04 | Chinese PLA Institute for Disease Control and Prevention                               | Chinese PLA Institute for Disease Control and Prevention                               | Peng Li, Jinhui Li, Lihong Li                                                                                                                             |
| EPI_ISL_430780 | hCoV-19/Beijing/GJ440/2020               | Asia / China / Beijing                      | 2020-02-04 | Chinese PLA Institute for Disease Control and Prevention                               | Chinese PLA Institute for Disease Control and Prevention                               | Peng Li, Jinhui Li, Lihong Li                                                                                                                             |
| EPI_ISL_430781 | hCoV-19/Beijing/GJ441/2020               | Asia / China / Beijing                      | 2020-02-04 | Chinese PLA Institute for Disease Control and Prevention                               | Chinese PLA Institute for Disease Control and Prevention                               | Peng Li, Jinhui Li, Lihong Li                                                                                                                             |
| EPI_ISL_430782 | hCoV-19/Beijing/GJ442/2020               | Asia / China / Beijing                      | 2020-02-04 | Chinese PLA Institute for Disease Control and Prevention                               | Chinese PLA Institute for Disease Control and Prevention                               | Peng Li, Jinhui Li, Lihong Li                                                                                                                             |
| EPI_ISL_430783 | hCoV-19/Beijing/GJ443/2020               | Asia / China / Beijing                      | 2020-02-04 | Chinese PLA Institute for Disease Control and Prevention                               | Chinese PLA Institute for Disease Control and Prevention                               | Peng Li, Jinhui Li, Lihong Li                                                                                                                             |
| EPI_ISL_430784 | hCoV-19/Beijing/GJ444/2020               | Asia / China / Beijing                      | 2020-02-04 | Chinese PLA Institute for Disease Control and Prevention                               | Chinese PLA Institute for Disease Control and Prevention                               | Peng Li, Jinhui Li, Lihong Li                                                                                                                             |
| EPI_ISL_430785 | hCoV-19/Beijing/GJ445/2020               | Asia / China / Beijing                      | 2020-02-04 | Chinese PLA Institute for Disease Control and Prevention                               | Chinese PLA Institute for Disease Control and Prevention                               | Peng Li, Jinhui Li, Lihong Li                                                                                                                             |
| EPI_ISL_430786 | hCoV-19/Beijing/GJ446/2020               | Asia / China / Beijing                      | 2020-02-04 | Chinese PLA Institute for Disease Control and Prevention                               | Chinese PLA Institute for Disease Control and Prevention                               | Peng Li, Jinhui Li, Lihong Li                                                                                                                             |
| EPI_ISL_430787 | hCoV-19/Beijing/GJ447/2020               | Asia / China / Beijing                      | 2020-02-04 | Chinese PLA Institute for Disease Control and Prevention                               | Chinese PLA Institute for Disease Control and Prevention                               | Peng Li, Jinhui Li, Lihong Li                                                                                                                             |
| EPI_ISL_430788 | hCoV-19/Beijing/GJ448/2020               | Asia / China / Beijing                      | 2020-02-04 | Chinese PLA Institute for Disease Control and Prevention                               | Chinese PLA Institute for Disease Control and Prevention                               | Peng Li, Jinhui Li, Lihong Li                                                                                                                             |
| EPI_ISL_430789 | hCoV-19/Beijing/GJ449/2020               | Asia / China / Beijing                      | 2020-02-04 | Chinese PLA Institute for Disease Control and Prevention                               | Chinese PLA Institute for Disease Control and Prevention                               | Peng Li, Jinhui Li, Lihong Li                                                                                                                             |
| EPI_ISL_430790 | hCoV-19/Beijing/GJ450/2020               | Asia / China / Beijing                      | 2020-02-04 | Chinese PLA Institute for Disease Control and Prevention                               | Chinese PLA Institute for Disease Control and Prevention                               | Peng Li, Jinhui Li, Lihong Li                                                                                                                             |
| EPI_ISL_430791 | hCoV-19/Beijing/GJ451/2020               | Asia / China / Beijing                      | 2020-02-04 | Chinese PLA Institute for Disease Control and Prevention                               | Chinese PLA Institute for Disease Control and Prevention                               | Peng Li, Jinhui Li, Lihong Li                                                                                                                             |
| EPI_ISL_430792 | hCoV-19/Beijing/GJ452/2020               | Asia / China / Beijing                      | 2020-02-04 | Chinese PLA Institute for Disease Control and Prevention                               | Chinese PLA Institute for Disease Control and Prevention                               | Peng Li, Jinhui Li, Lihong Li                                                                                                                             |
| EPI_ISL_430793 | hCoV-19/Beijing/GJ453/2020               | Asia / China / Beijing                      | 2020-02-04 | Chinese PLA Institute for Disease Control and Prevention                               | Chinese PLA Institute for Disease Control and Prevention                               | Peng Li, Jinhui Li, Lihong Li                                                                                                                             |
| EPI_ISL_430794 | hCoV-19/Beijing/GJ454/2020               | Asia / China / Beijing                      | 2020-02-04 | Chinese PLA Institute for Disease Control and Prevention                               | Chinese PLA Institute for Disease Control and Prevention                               | Peng Li, Jinhui Li, Lihong Li                                                                                                                             |
| EPI_ISL_430795 | hCoV-19/Beijing/GJ455/2020               | Asia / China / Beijing                      | 2020-02-04 | Chinese PLA Institute for Disease Control and Prevention                               | Chinese PLA Institute for Disease Control and Prevention                               | Peng Li, Jinhui Li, Lihong Li                                                                                                                             |
| EPI_ISL_430796 | hCoV-19/Beijing/GJ456/2020               | Asia / China / Beijing                      | 2020-02-04 | Chinese PLA Institute for Disease Control and Prevention                               | Chinese PLA Institute for Disease Control and Prevention                               | Peng Li, Jinhui Li, Lihong Li                                                                                                                             |
| EPI_ISL_430797 | hCoV-19/Beijing/GJ457/2020               | Asia / China / Beijing                      | 2020-02-04 | Chinese PLA Institute for Disease Control and Prevention                               | Chinese PLA Institute for Disease Control and Prevention                               | Peng Li, Jinhui Li, Lihong Li                                                                                                                             |
| EPI_ISL_430798 | hCoV-19/Beijing/GJ458/2020               | Asia / China / Beijing                      | 2020-02-04 | Chinese PLA Institute for Disease Control and Prevention                               | Chinese PLA Institute for Disease Control and Prevention                               | Peng Li, Jinhui Li, Lihong Li                                                                                                                             |
| EPI_ISL_430799 | hCoV-19/Beijing/GJ459/2020               | Asia / China / Beijing                      | 2020-02-04 | Chinese PLA Institute for Disease Control and Prevention                               | Chinese PLA Institute for Disease Control and Prevention                               | Peng Li, Jinhui Li, Lihong Li                                                                                                                             |
| EPI_ISL_430800 | hCoV-19/Beijing/GJ460/2020               | Asia / China / Beijing                      | 2020-02-04 | Chinese PLA Institute for Disease Control and Prevention                               | Chinese PLA Institute for Disease Control and Prevention                               | Peng Li, Jinhui Li, Lihong Li                                                                                                                             |
| EPI_ISL_430801 | hCoV-19/Beijing/GJ461/2020               | Asia / China / Beijing                      | 2020-02-04 | Chinese PLA Institute for Disease Control and Prevention                               | Chinese PLA Institute for Disease Control and Prevention                               | Peng Li, Jinhui Li, Lihong Li                                                                                                                             |
| EPI_ISL_430802 | hCoV-19/Beijing/GJ462/2020               | Asia / China / Beijing                      | 2020-02-04 | Chinese PLA Institute for Disease Control and Prevention                               | Chinese PLA Institute for Disease Control and Prevention                               | Peng Li, Jinhui Li, Lihong Li                                                                                                                             |
| EPI_ISL_430803 | hCoV-19/Beijing/GJ463/2020               | Asia / China / Beijing                      | 2020-02-04 | Chinese PLA Institute for Disease Control and Prevention                               | Chinese PLA Institute for Disease Control and Prevention                               | Peng Li, Jinhui Li, Lihong Li                                                                                                                             |
| EPI_ISL_430804 | hCoV-19/Beijing/GJ464/2020               | Asia / China / Beijing                      | 2020-02-04 | Chinese PLA Institute for Disease Control and Prevention                               | Chinese PLA Institute for Disease Control and Prevention                               | Peng Li, Jinhui Li, Lihong Li                                                                                                                             |
| EPI_ISL_430805 | hCoV-19/Beijing/GJ465/2020               | Asia / China / Beijing                      | 2020-02-04 | Chinese PLA Institute for Disease Control and Prevention                               | Chinese PLA Institute for Disease Control and Prevention                               | Peng Li, Jinhui Li, Lihong Li                                                                                                                             |
| EPI_ISL_430806 | hCoV-19/Beijing/GJ466/2020               | Asia / China / Beijing                      |            |                                                                                        |                                                                                        |                                                                                                                                                           |

Page PAGE]

[illegible]

[illegible]



[illegible]

|                |                                      |                                                       |            |                                                                                                                                                          |                                                                                                                                                          |                                                                                                                                                                                                                                                                                                                                                                                                                                                                                                                                                                                                                                                                                                                                                                                                                                                                                                                                                                                                                             |
|----------------|--------------------------------------|-------------------------------------------------------|------------|----------------------------------------------------------------------------------------------------------------------------------------------------------|----------------------------------------------------------------------------------------------------------------------------------------------------------|-----------------------------------------------------------------------------------------------------------------------------------------------------------------------------------------------------------------------------------------------------------------------------------------------------------------------------------------------------------------------------------------------------------------------------------------------------------------------------------------------------------------------------------------------------------------------------------------------------------------------------------------------------------------------------------------------------------------------------------------------------------------------------------------------------------------------------------------------------------------------------------------------------------------------------------------------------------------------------------------------------------------------------|
| EPI_ISL_44519  | hCoV-19/Bangladesh/DNAS_CPH_43/2020  | Asia / Bangladesh / Dhaka                             | 2020-04-28 | DNA Solution Ltd.                                                                                                                                        | DNA Solution Ltd.                                                                                                                                        | MD Imran Khan, Kazi Nadeem Asad, Abu Sofian, Mohammed Nafiz Imtiaz Poul, Abdul Khaleque, Muzannur Rahman, MCM Chowdhury, Hassan UI Haider, Mamudul Hasan Raza, Md. Khan, Mohammad Fazel Alam Rabbil                                                                                                                                                                                                                                                                                                                                                                                                                                                                                                                                                                                                                                                                                                                                                                                                                         |
| EPI_ISL_445219 | hCoV-19/Colombia/Cal-01-2/2020       | South America / Colombia / Valle del Cauca/2020-04-02 | 2020-04-02 | Universidad del Valle, Laboratorio de Microbiología, VIREM                                                                                               | Universidad del Valle, Universidad Nacional de Colombia Sede Palmira, International Centre for Tropical Agriculture                                      | Beatriz Parra, Diana López-Alvarez, Wilmer J. Cuello                                                                                                                                                                                                                                                                                                                                                                                                                                                                                                                                                                                                                                                                                                                                                                                                                                                                                                                                                                        |
| EPI_ISL_445220 | hCoV-19/Romania/270606/2020          | Europe / Romania / Bucharest                          | 2020-04-30 | Medical Institute for Research and Development                                                                                                           | Cantacuzino Institute                                                                                                                                    | ML Lazar, L. Ustela, A. Cretu                                                                                                                                                                                                                                                                                                                                                                                                                                                                                                                                                                                                                                                                                                                                                                                                                                                                                                                                                                                               |
| EPI_ISL_445243 | hCoV-19/Romania/270607/2020          | Europe / Romania / Constanta                          | 2020-04-30 | Laboratory for Respiratory Viruses, Cantacuzino National Military                                                                                        | Cantacuzino Institute                                                                                                                                    | MD Alazar, ML Easim Anst                                                                                                                                                                                                                                                                                                                                                                                                                                                                                                                                                                                                                                                                                                                                                                                                                                                                                                                                                                                                    |
| EPI_ISL_445244 | hCoV-19/Bangladesh/Abdomen_01_2/2020 | Asia / Bangladesh                                     | 2020-04-28 | Abdomen lab                                                                                                                                              | Tegajan College bmb lab                                                                                                                                  | Kamtesh J Upadhyay, Ramesh Pandit, Tejas Shah, Ankit Hirsu, Pritesh Sabara, Apurvash Puvver, Janvi Ravul, Monika Gandhi, Pinal Trivedi, Mahanshi Pandya, Anil Kanani, Akanksha Verma, Nish Savaliya, Raghavendra Kumar, Dinesh Kumar, Zuber Salyed, Dipa Kaniwale, Disha Patel, Binla Aring, Neeta Khandewal, Geeta Vaghela, Sonia Barve, Bhavesh Modi, Karavi Joshi, Gaurishanker Shrivast, Nidhi Sood, Pranay Shah, R D Dixit, Snehal Bagpatharia, Anjali Rajwar, Chaitanya Joshi, Madhi Joshi, Ramesh Pandit, Tejas Shah, Ankit Hirsu, Pritesh Sabara, Apurvash Puvver, Janvi Ravul, Monika Gandhi, Pinal Trivedi, Mahanshi Pandya, Anil Kanani, Akanksha Verma, Nish Savaliya, Raghavendra Kumar, Dinesh Kumar, Zuber Salyed, Dipa Kaniwale, Disha Patel, Binla Aring, Neeta Khandewal, Geeta Vaghela, Sonia Barve, Bhavesh Modi, Karavi Joshi, Gaurishanker Shrivast, Nidhi Sood, Pranay Shah, R D Dixit, Snehal Bagpatharia, Kamlesh J Upadhyay, Ramesh Pandit, Tejas Shah, Nidhi Patel, Chaitanya Joshi, Madhi Joshi |
| EPI_ISL_447030 | hCoV-19/India/GJRCR5a/2020           | Asia / India / Gujarat / Ahmedabad                    | 2020-05-03 | B.J. Medical College and Civil hospital                                                                                                                  | Gujarat Biotechnology Research Centre                                                                                                                    | Ankit Hirsu, Pritesh Sabara, Apurvash Puvver, Janvi Ravul, Monika Gandhi, Pinal Trivedi, Mahanshi Pandya, Anil Kanani, Akanksha Verma, Nish Savaliya, Raghavendra Kumar, Dinesh Kumar, Zuber Salyed, Dipa Kaniwale, Disha Patel, Binla Aring, Neeta Khandewal, Geeta Vaghela, Sonia Barve, Bhavesh Modi, Karavi Joshi, Gaurishanker Shrivast, Nidhi Sood, Pranay Shah, R D Dixit, Snehal Bagpatharia, Kamlesh J Upadhyay, Ramesh Pandit, Tejas Shah, Nidhi Patel, Chaitanya Joshi, Madhi Joshi                                                                                                                                                                                                                                                                                                                                                                                                                                                                                                                              |
| EPI_ISL_447031 | hCoV-19/India/GJRCR5b/2020           | Asia / India / Gujarat / Ahmedabad                    | 2020-05-03 | B.J. Medical College and Civil hospital                                                                                                                  | Gujarat Biotechnology Research Centre                                                                                                                    | Ankit Hirsu, Pritesh Sabara, Apurvash Puvver, Janvi Ravul, Monika Gandhi, Pinal Trivedi, Mahanshi Pandya, Anil Kanani, Akanksha Verma, Nish Savaliya, Raghavendra Kumar, Dinesh Kumar, Zuber Salyed, Dipa Kaniwale, Disha Patel, Binla Aring, Neeta Khandewal, Geeta Vaghela, Sonia Barve, Bhavesh Modi, Karavi Joshi, Gaurishanker Shrivast, Nidhi Sood, Pranay Shah, R D Dixit, Snehal Bagpatharia, Kamlesh J Upadhyay, Ramesh Pandit, Tejas Shah, Nidhi Patel, Chaitanya Joshi, Madhi Joshi                                                                                                                                                                                                                                                                                                                                                                                                                                                                                                                              |
| EPI_ISL_447033 | hCoV-19/India/GJRCR5b/2020           | Asia / India / Gujarat / Ahmedabad                    | 2020-05-03 | B.J. Medical College and Civil hospital                                                                                                                  | Gujarat Biotechnology Research Centre                                                                                                                    | Ankit Hirsu, Pritesh Sabara, Apurvash Puvver, Janvi Ravul, Monika Gandhi, Pinal Trivedi, Mahanshi Pandya, Anil Kanani, Akanksha Verma, Nish Savaliya, Raghavendra Kumar, Dinesh Kumar, Zuber Salyed, Dipa Kaniwale, Disha Patel, Binla Aring, Neeta Khandewal, Geeta Vaghela, Sonia Barve, Bhavesh Modi, Karavi Joshi, Gaurishanker Shrivast, Nidhi Sood, Pranay Shah, R D Dixit, Snehal Bagpatharia, Kamlesh J Upadhyay, Ramesh Pandit, Tejas Shah, Nidhi Patel, Chaitanya Joshi, Madhi Joshi                                                                                                                                                                                                                                                                                                                                                                                                                                                                                                                              |
| EPI_ISL_447034 | hCoV-19/India/GJRCR5/9/2020          | Asia / India / Gujarat / Ahmedabad                    | 2020-05-03 | B.J. Medical College and Civil hospital                                                                                                                  | Gujarat Biotechnology Research Centre                                                                                                                    | Ankit Hirsu, Pritesh Sabara, Apurvash Puvver, Janvi Ravul, Monika Gandhi, Pinal Trivedi, Mahanshi Pandya, Anil Kanani, Akanksha Verma, Nish Savaliya, Raghavendra Kumar, Dinesh Kumar, Zuber Salyed, Dipa Kaniwale, Disha Patel, Binla Aring, Neeta Khandewal, Geeta Vaghela, Sonia Barve, Bhavesh Modi, Karavi Joshi, Gaurishanker Shrivast, Nidhi Sood, Pranay Shah, R D Dixit, Snehal Bagpatharia, Kamlesh J Upadhyay, Ramesh Pandit, Tejas Shah, Nidhi Patel, Chaitanya Joshi, Madhi Joshi                                                                                                                                                                                                                                                                                                                                                                                                                                                                                                                              |
| EPI_ISL_447035 | hCoV-19/India/GJRCR0/2020            | Asia / India / Gujarat / Ahmedabad                    | 2020-05-03 | B.J. Medical College and Civil hospital                                                                                                                  | Gujarat Biotechnology Research Centre                                                                                                                    | Ankit Hirsu, Pritesh Sabara, Nisha Rajpara, Chaitanya Joshi, Madhi Joshi                                                                                                                                                                                                                                                                                                                                                                                                                                                                                                                                                                                                                                                                                                                                                                                                                                                                                                                                                    |
| EPI_ISL_447038 | hCoV-19/India/GJRCR3/2/2020          | Asia / India / Gujarat / Ahmedabad                    | 2020-05-03 | B.J. Medical College and Civil hospital                                                                                                                  | Gujarat Biotechnology Research Centre                                                                                                                    | Ankit Hirsu, Pritesh Sabara, Apurvash Puvver, Janvi Ravul, Monika Gandhi, Pinal Trivedi, Mahanshi Pandya, Anil Kanani, Akanksha Verma, Nish Savaliya, Raghavendra Kumar, Dinesh Kumar, Zuber Salyed, Dipa Kaniwale, Disha Patel, Binla Aring, Neeta Khandewal, Geeta Vaghela, Sonia Barve, Bhavesh Modi, Karavi Joshi, Gaurishanker Shrivast, Nidhi Sood, Pranay Shah, R D Dixit, Snehal Bagpatharia, Kamlesh J Upadhyay, Ramesh Pandit, Tejas Shah, Ankit Hirsu, Pritesh Sabara, Apurvash Puvver, Janvi Ravul, Monika Gandhi, Pinal Trivedi, Mahanshi Pandya, Anil Kanani, Akanksha Verma, Nish Savaliya, Raghavendra Kumar, Dinesh Kumar, Zuber Salyed, Dipa Kaniwale, Disha Patel, Binla Aring, Neeta Khandewal, Geeta Vaghela, Sonia Barve, Bhavesh Modi, Karavi Joshi, Gaurishanker Shrivast, Nidhi Sood, Pranay Shah, R D Dixit, Snehal Bagpatharia, Kamlesh J Upadhyay, Ramesh Pandit, Tejas Shah, Nidhi Patel, Chaitanya Joshi, Madhi Joshi                                                                         |
| EPI_ISL_447039 | hCoV-19/India/GJRCR4/2/2020          | Asia / India / Gujarat / Ahmedabad                    | 2020-05-03 | B.J. Medical College and Civil hospital                                                                                                                  | Gujarat Biotechnology Research Centre                                                                                                                    | Ankit Hirsu, Pritesh Sabara, Apurvash Puvver, Janvi Ravul, Monika Gandhi, Pinal Trivedi, Mahanshi Pandya, Anil Kanani, Akanksha Verma, Nish Savaliya, Raghavendra Kumar, Dinesh Kumar, Zuber Salyed, Dipa Kaniwale, Disha Patel, Binla Aring, Neeta Khandewal, Geeta Vaghela, Sonia Barve, Bhavesh Modi, Karavi Joshi, Gaurishanker Shrivast, Nidhi Sood, Pranay Shah, R D Dixit, Snehal Bagpatharia, Kamlesh J Upadhyay, Ramesh Pandit, Tejas Shah, Nidhi Patel, Chaitanya Joshi, Madhi Joshi                                                                                                                                                                                                                                                                                                                                                                                                                                                                                                                              |
| EPI_ISL_447042 | hCoV-19/India/GJRCR6/2020            | Asia / India / Gujarat / Ahmedabad                    | 2020-05-03 | B.J. Medical College and Civil hospital                                                                                                                  | Gujarat Biotechnology Research Centre                                                                                                                    | Ankit Hirsu, Pritesh Sabara, Apurvash Puvver, Janvi Ravul, Monika Gandhi, Pinal Trivedi, Mahanshi Pandya, Anil Kanani, Akanksha Verma, Nish Savaliya, Raghavendra Kumar, Dinesh Kumar, Zuber Salyed, Dipa Kaniwale, Disha Patel, Binla Aring, Neeta Khandewal, Geeta Vaghela, Sonia Barve, Bhavesh Modi, Karavi Joshi, Gaurishanker Shrivast, Nidhi Sood, Pranay Shah, R D Dixit, Snehal Bagpatharia, Kamlesh J Upadhyay, Ramesh Pandit, Tejas Shah, Nidhi Patel, Chaitanya Joshi, Madhi Joshi                                                                                                                                                                                                                                                                                                                                                                                                                                                                                                                              |
| EPI_ISL_447043 | hCoV-19/India/GJRCR7a/2020           | Asia / India / Gujarat / Ahmedabad                    | 2020-05-03 | B.J. Medical College and Civil hospital                                                                                                                  | Gujarat Biotechnology Research Centre                                                                                                                    | Ankit Hirsu, Pritesh Sabara, Apurvash Puvver, Janvi Ravul, Monika Gandhi, Pinal Trivedi, Mahanshi Pandya, Anil Kanani, Akanksha Verma, Nish Savaliya, Raghavendra Kumar, Dinesh Kumar, Zuber Salyed, Dipa Kaniwale, Disha Patel, Binla Aring, Neeta Khandewal, Geeta Vaghela, Sonia Barve, Bhavesh Modi, Karavi Joshi, Gaurishanker Shrivast, Nidhi Sood, Pranay Shah, R D Dixit, Snehal Bagpatharia, Kamlesh J Upadhyay, Ramesh Pandit, Tejas Shah, Nidhi Patel, Chaitanya Joshi, Madhi Joshi                                                                                                                                                                                                                                                                                                                                                                                                                                                                                                                              |
| EPI_ISL_447044 | hCoV-19/India/GJRCR7b/2020           | Asia / India / Gujarat / Ahmedabad                    | 2020-05-03 | B.J. Medical College and Civil hospital                                                                                                                  | Gujarat Biotechnology Research Centre                                                                                                                    | Ankit Hirsu, Pritesh Sabara, Apurvash Puvver, Janvi Ravul, Monika Gandhi, Pinal Trivedi, Mahanshi Pandya, Anil Kanani, Akanksha Verma, Nish Savaliya, Raghavendra Kumar, Dinesh Kumar, Zuber Salyed, Dipa Kaniwale, Disha Patel, Binla Aring, Neeta Khandewal, Geeta Vaghela, Sonia Barve, Bhavesh Modi, Karavi Joshi, Gaurishanker Shrivast, Nidhi Sood, Pranay Shah, R D Dixit, Snehal Bagpatharia, Kamlesh J Upadhyay, Ramesh Pandit, Tejas Shah, Nidhi Patel, Chaitanya Joshi, Madhi Joshi                                                                                                                                                                                                                                                                                                                                                                                                                                                                                                                              |
| EPI_ISL_447048 | hCoV-19/India/GJRCR7/10/2020         | Asia / India / Gujarat / Gandhinagar                  | 2020-04-27 | GMERS Medical College and Hospital, Gandhinagar                                                                                                          | Gujarat Biotechnology Research Centre                                                                                                                    | Ankit Hirsu, Pritesh Sabara, Apurvash Puvver, Janvi Ravul, Monika Gandhi, Pinal Trivedi, Mahanshi Pandya, Anil Kanani, Akanksha Verma, Nish Savaliya, Raghavendra Kumar, Dinesh Kumar, Zuber Salyed, Dipa Kaniwale, Disha Patel, Binla Aring, Neeta Khandewal, Geeta Vaghela, Sonia Barve, Bhavesh Modi, Karavi Joshi, Gaurishanker Shrivast, Nidhi Sood, Pranay Shah, R D Dixit, Snehal Bagpatharia, Kamlesh J Upadhyay, Ramesh Pandit, Tejas Shah, Nidhi Patel, Chaitanya Joshi, Madhi Joshi                                                                                                                                                                                                                                                                                                                                                                                                                                                                                                                              |
| EPI_ISL_447053 | hCoV-19/India/GJRCR7/5/2020          | Asia / India / Gujarat / Gandhinagar                  | 2020-04-29 | GMERS Medical College and Hospital, Gandhinagar                                                                                                          | Gujarat Biotechnology Research Centre                                                                                                                    | Ankit Hirsu, Pritesh Sabara, Apurvash Puvver, Janvi Ravul, Monika Gandhi, Pinal Trivedi, Mahanshi Pandya, Anil Kanani, Akanksha Verma, Nish Savaliya, Raghavendra Kumar, Dinesh Kumar, Zuber Salyed, Dipa Kaniwale, Disha Patel, Binla Aring, Neeta Khandewal, Geeta Vaghela, Sonia Barve, Bhavesh Modi, Karavi Joshi, Gaurishanker Shrivast, Nidhi Sood, Pranay Shah, R D Dixit, Snehal Bagpatharia, Kamlesh J Upadhyay, Ramesh Pandit, Tejas Shah, Nidhi Patel, Chaitanya Joshi, Madhi Joshi                                                                                                                                                                                                                                                                                                                                                                                                                                                                                                                              |
| EPI_ISL_447054 | hCoV-19/Romania/270608/2020          | Europe / Romania / Constanta                          | 2020-04-30 | Cantacuzino National Military-Medical Institute for Research and Development                                                                             | Cantacuzino Institute                                                                                                                                    | ML Lazar, L. Ustela, A. Cretu                                                                                                                                                                                                                                                                                                                                                                                                                                                                                                                                                                                                                                                                                                                                                                                                                                                                                                                                                                                               |
| EPI_ISL_447374 | hCoV-19/Colombia/GUR-007/2020        | South America / Colombia / Cades / Antio/2020-03-26   | 2020-03-26 | Grupo de Investigaciones Microbiológicas UR (GIMUR), Departamento de Biología, Facultad de Ciencias Naturales, Universidad del Rosario, Bogotá, Colombia | Grupo de Investigaciones Microbiológicas UR (GIMUR), Departamento de Biología, Facultad de Ciencias Naturales, Universidad del Rosario, Bogotá, Colombia | Opina, Anibal A. Teherán, Ana S. González-Reiche, Matthew W. Hernandez, Emilia Mia Sordillo, Viviana Simón, Hamn van Bakel, Alberto Parisi-Mondolfi                                                                                                                                                                                                                                                                                                                                                                                                                                                                                                                                                                                                                                                                                                                                                                                                                                                                         |
| EPI_ISL_447735 | hCoV-19/Colombia/GUR-008/2020        | South America / Colombia / Valle del Cau/2020-03-26   | 2020-03-26 | Grupo de Investigaciones Microbiológicas UR (GIMUR), Departamento de Biología, Facultad de Ciencias Naturales, Universidad del Rosario, Bogotá, Colombia | Grupo de Investigaciones Microbiológicas UR (GIMUR), Departamento de Biología, Facultad de Ciencias Naturales, Universidad del Rosario, Bogotá, Colombia | Opina, Anibal A. Teherán, Ana S. González-Reiche, Matthew W. Hernandez, Emilia Mia Sordillo, Viviana Simón, Hamn van Bakel, Alberto Parisi-Mondolfi                                                                                                                                                                                                                                                                                                                                                                                                                                                                                                                                                                                                                                                                                                                                                                                                                                                                         |
| EPI_ISL_447736 | hCoV-19/Colombia/GUR-009/2020        | South America / Colombia / Valle del Cau/2020-03-26   | 2020-03-26 | Grupo de Investigaciones Microbiológicas UR (GIMUR), Departamento de Biología, Facultad de Ciencias Naturales, Universidad del Rosario, Bogotá, Colombia | Grupo de Investigaciones Microbiológicas UR (GIMUR), Departamento de Biología, Facultad de Ciencias Naturales, Universidad del Rosario, Bogotá, Colombia | Opina, Anibal A. Teherán, Ana S. González-Reiche, Matthew W. Hernandez, Emilia Mia Sordillo, Viviana Simón, Hamn van Bakel, Alberto Parisi-Mondolfi                                                                                                                                                                                                                                                                                                                                                                                                                                                                                                                                                                                                                                                                                                                                                                                                                                                                         |
| EPI_ISL_447737 | hCoV-19/Colombia/GUR-013/2020        | South America / Colombia / Valle del Cau/2020-03-26   | 2020-03-26 | Grupo de Investigaciones Microbiológicas UR (GIMUR), Departamento de Biología, Facultad de Ciencias Naturales, Universidad del Rosario, Bogotá, Colombia | Grupo de Investigaciones Microbiológicas UR (GIMUR), Departamento de Biología, Facultad de Ciencias Naturales, Universidad del Rosario, Bogotá, Colombia | Opina, Anibal A. Teherán, Ana S. González-Reiche, Matthew W. Hernandez, Emilia Mia Sordillo, Viviana Simón, Hamn van Bakel, Alberto Parisi-Mondolfi                                                                                                                                                                                                                                                                                                                                                                                                                                                                                                                                                                                                                                                                                                                                                                                                                                                                         |
| EPI_ISL_447738 | hCoV-19/Colombia/GUR-020/2020        | South America / Colombia / Boyaca / Tego/2020-03-26   | 2020-03-26 | Grupo de Investigaciones Microbiológicas UR (GIMUR), Departamento de Biología, Facultad de Ciencias Naturales, Universidad del Rosario, Bogotá, Colombia | Grupo de Investigaciones Microbiológicas UR (GIMUR), Departamento de Biología, Facultad de Ciencias Naturales, Universidad del Rosario, Bogotá, Colombia | Opina, Anibal A. Teherán, Ana S. González-Reiche, Matthew W. Hernandez, Emilia Mia Sordillo, Viviana Simón, Hamn van Bakel, Alberto Parisi-Mondolfi                                                                                                                                                                                                                                                                                                                                                                                                                                                                                                                                                                                                                                                                                                                                                                                                                                                                         |
| EPI_ISL_447739 | hCoV-19/Colombia/GUR-020/2020        | South America / Colombia / Boyaca / Tego/2020-03-27   | 2020-03-27 | Grupo de Investigaciones Microbiológicas UR (GIMUR), Departamento de Biología, Facultad de Ciencias Naturales, Universidad del Rosario, Bogotá, Colombia | Grupo de Investigaciones Microbiológicas UR (GIMUR), Departamento de Biología, Facultad de Ciencias Naturales, Universidad del Rosario, Bogotá, Colombia | Opina, Anibal A. Teherán, Ana S. González-Reiche, Matthew W. Hernandez, Emilia Mia Sordillo, Viviana Simón, Hamn van Bakel, Alberto Parisi-Mondolfi                                                                                                                                                                                                                                                                                                                                                                                                                                                                                                                                                                                                                                                                                                                                                                                                                                                                         |
| EPI_ISL_447740 | hCoV-19/Colombia/GUR-020/2020        | South America / Colombia / Boyaca / Tego/2020-03-28   | 2020-03-28 | Grupo de Investigaciones Microbiológicas UR (GIMUR), Departamento de Biología, Facultad de Ciencias Naturales, Universidad del Rosario, Bogotá, Colombia | Grupo de Investigaciones Microbiológicas UR (GIMUR), Departamento de Biología, Facultad de Ciencias Naturales, Universidad del Rosario, Bogotá, Colombia | Opina, Anibal A. Teherán, Ana S. González-Reiche, Matthew W. Hernandez, Emilia Mia Sordillo, Viviana Simón, Hamn van Bakel, Alberto Parisi-Mondolfi                                                                                                                                                                                                                                                                                                                                                                                                                                                                                                                                                                                                                                                                                                                                                                                                                                                                         |
| EPI_ISL_447741 | hCoV-19/Colombia/GUR-0210/2020       | South America / Colombia / Boyaca / Tego/2020-03-28   | 2020-03-28 | Grupo de Investigaciones Microbiológicas UR (GIMUR), Departamento de Biología, Facultad de Ciencias Naturales, Universidad del Rosario, Bogotá, Colombia | Grupo de Investigaciones Microbiológicas UR (GIMUR), Departamento de Biología, Facultad de Ciencias Naturales, Universidad del Rosario, Bogotá, Colombia | Opina, Anibal A. Teherán, Ana S. González-Reiche, Matthew W. Hernandez, Emilia Mia Sordillo, Viviana Simón, Hamn van Bakel, Alberto Parisi-Mondolfi                                                                                                                                                                                                                                                                                                                                                                                                                                                                                                                                                                                                                                                                                                                                                                                                                                                                         |
| EPI_ISL_447742 | hCoV-19/Colombia/GUR-0212/2020       | South America / Colombia / Boyaca / Tego/2020-03-28   | 2020-03-28 | Grupo de Investigaciones Microbiológicas UR (GIMUR), Departamento de Biología, Facultad de Ciencias Naturales, Universidad del Rosario, Bogotá, Colombia | Grupo de Investigaciones Microbiológicas UR (GIMUR), Departamento de Biología, Facultad de Ciencias Naturales, Universidad del Rosario, Bogotá, Colombia | Opina, Anibal A. Teherán, Ana S. González-Reiche, Matthew W. Hernandez, Emilia Mia Sordillo, Viviana Simón, Hamn van Bakel, Alberto Parisi-Mondolfi                                                                                                                                                                                                                                                                                                                                                                                                                                                                                                                                                                                                                                                                                                                                                                                                                                                                         |
| EPI_ISL_447743 | hCoV-19/Colombia/GUR-0215/2020       | South America / Colombia / Boyaca / Tego/2020-03-28   | 2020-03-28 | Grupo de Investigaciones Microbiológicas UR (GIMUR), Departamento de Biología, Facultad de Ciencias Naturales, Universidad del Rosario, Bogotá, Colombia | Grupo de Investigaciones Microbiológicas UR (GIMUR), Departamento de Biología, Facultad de Ciencias Naturales, Universidad del Rosario, Bogotá, Colombia | Opina, Anibal A. Teherán, Ana S. González-Reiche, Matthew W. Hernandez, Emilia Mia Sordillo, Viviana Simón, Hamn van Bakel, Alberto Parisi-Mondolfi                                                                                                                                                                                                                                                                                                                                                                                                                                                                                                                                                                                                                                                                                                                                                                                                                                                                         |
| EPI_ISL_447744 | hCoV-19/Colombia/GUR-045/2020        | South America / Colombia / Cundinamarca/2020-03-28    | 2020-03-28 | Grupo de Investigaciones Microbiológicas UR (GIMUR), Departamento de Biología, Facultad de Ciencias Naturales, Universidad del Rosario, Bogotá, Colombia | Grupo de Investigaciones Microbiológicas UR (GIMUR), Departamento de Biología, Facultad de Ciencias Naturales, Universidad del Rosario, Bogotá, Colombia | Opina, Anibal A. Teherán, Ana S. González-Reiche, Matthew W. Hernandez, Emilia Mia Sordillo, Viviana Simón, Hamn van Bakel, Alberto Parisi-Mondolfi                                                                                                                                                                                                                                                                                                                                                                                                                                                                                                                                                                                                                                                                                                                                                                                                                                                                         |
| EPI_ISL_447745 | hCoV-19/Colombia/GUR-045/2020        | South America / Colombia / Cundinamarca/2020-03-28    | 2020-03-28 | Grupo de Investigaciones Microbiológicas UR (GIMUR), Departamento de Biología, Facultad de Ciencias Naturales, Universidad del Rosario, Bogotá, Colombia | Grupo de Investigaciones Microbiológicas UR (GIMUR), Departamento de Biología, Facultad de Ciencias Naturales, Universidad del Rosario, Bogotá, Colombia | Opina, Anibal A. Teherán, Ana S. González-Reiche, Matthew W. Hernandez, Emilia Mia Sordillo, Viviana Simón, Hamn van Bakel, Alberto Parisi-Mondolfi                                                                                                                                                                                                                                                                                                                                                                                                                                                                                                                                                                                                                                                                                                                                                                                                                                                                         |
| EPI_ISL_447746 | hCoV-19/Colombia/GUR-045/2020        | South America / Colombia / Cundinamarca/2020-03-28    | 2020-03-28 | Grupo de Investigaciones Microbiológicas UR (GIMUR), Departamento de Biología, Facultad de Ciencias Naturales, Universidad del Rosario, Bogotá, Colombia | Grupo de Investigaciones Microbiológicas UR (GIMUR), Departamento de Biología, Facultad de Ciencias Naturales, Universidad del Rosario, Bogotá, Colombia | Opina, Anibal A. Teherán, Ana S. González-Reiche, Matthew W. Hernandez, Emilia Mia Sordillo, Viviana Simón, Hamn van Bakel, Alberto Parisi-Mondolfi                                                                                                                                                                                                                                                                                                                                                                                                                                                                                                                                                                                                                                                                                                                                                                                                                                                                         |
| EPI_ISL_447747 | hCoV-19/Colombia/GUR-057/2020        | South America / Colombia / Boyaca / Sar/2020-03-28    | 2020-03-28 | Grupo de Investigaciones Microbiológicas UR (GIMUR), Departamento de Biología, Facultad de Ciencias Naturales, Universidad del Rosario, Bogotá, Colombia | Grupo de Investigaciones Microbiológicas UR (GIMUR), Departamento de Biología, Facultad de Ciencias Naturales, Universidad del Rosario, Bogotá, Colombia | Opina, Anibal A. Teherán, Ana S. González-Reiche, Matthew W. Hernandez, Emilia Mia Sordillo, Viviana Simón, Hamn van Bakel, Alberto Parisi-Mondolfi                                                                                                                                                                                                                                                                                                                                                                                                                                                                                                                                                                                                                                                                                                                                                                                                                                                                         |
| EPI_ISL_447748 | hCoV-19/Colombia/GUR-060/2020        | South America / Colombia / Narino / Ipito/2020-03-29  | 2020-03-29 | Grupo de Investigaciones Microbiológicas UR (GIMUR), Departamento de Biología, Facultad de Ciencias Naturales, Universidad del Rosario, Bogotá, Colombia | Grupo de Investigaciones Microbiológicas UR (GIMUR), Departamento de Biología, Facultad de Ciencias Naturales, Universidad del Rosario, Bogotá, Colombia | Opina, Anibal A. Teherán, Ana S. González-Reiche, Matthew W. Hernandez, Emilia Mia Sordillo, Viviana Simón, Hamn van Bakel, Alberto Parisi-Mondolfi                                                                                                                                                                                                                                                                                                                                                                                                                                                                                                                                                                                                                                                                                                                                                                                                                                                                         |
| EPI_ISL_447749 | hCoV-19/Colombia/GUR-062/2020        | South America / Colombia / Narino / Ipito/2020-03-29  | 2020-03-29 | Grupo de Investigaciones Microbiológicas UR (GIMUR), Departamento de Biología, Facultad de Ciencias Naturales, Universidad del Rosario, Bogotá, Colombia | Grupo de Investigaciones Microbiológicas UR (GIMUR), Departamento de Biología, Facultad de Ciencias Naturales, Universidad del Rosario, Bogotá, Colombia | Opina, Anibal A. Teherán, Ana S. González-Reiche, Matthew W. Hernandez, Emilia Mia Sordillo, Viviana Simón, Hamn van Bakel, Alberto Parisi-Mondolfi                                                                                                                                                                                                                                                                                                                                                                                                                                                                                                                                                                                                                                                                                                                                                                                                                                                                         |

[illegible]

|                |                                 |                                                       |                                                |
|----------------|---------------------------------|-------------------------------------------------------|------------------------------------------------|
| EPI_ISL_447787 | hCoV-19/Columbia/GV1-93535/2020 | South America / Colombia / Valle del Cauca/2020-04-03 | Instituto Nacional de Salud, Bogotá, Colombia  |
| EPI_ISL_447789 | hCoV-19/Columbia/GV1-93537/2020 | South America / Colombia / Valle del Cauca/2020-04-03 | Instituto Nacional de Salud, Bogotá, Colombia  |
| EPI_ISL_447790 | hCoV-19/Columbia/GV1-93538/2020 | South America / Colombia / Valle del Cauca/2020-04-03 | Instituto Nacional de Salud, Bogotá, Colombia  |
| EPI_ISL_447791 | hCoV-19/Columbia/GV1-97161/2020 | South America / Colombia / Valle del Cauca/2020-04-03 | Instituto Nacional de Salud, Bogotá, Colombia  |
| EPI_ISL_447792 | hCoV-19/Columbia/GV1-97181/2020 | South America / Colombia / Valle del Cauca/2020-04-03 | Instituto Nacional de Salud, Bogotá, Colombia  |
| EPI_ISL_447793 | hCoV-19/Columbia/GV1-97203/2020 | South America / Colombia / Valle del Cauca/2020-04-03 | Instituto Nacional de Salud, Bogotá, Colombia  |
| EPI_ISL_447794 | hCoV-19/Columbia/GV1-97210/2020 | South America / Colombia / Valle del Cauca/2020-04-03 | Instituto Nacional de Salud, Bogotá, Colombia  |
| EPI_ISL_447795 | hCoV-19/Columbia/GV1-97212/2020 | South America / Colombia / Valle del Cauca/2020-04-04 | Instituto Nacional de Salud, Bogotá, Colombia  |
| EPI_ISL_447796 | hCoV-19/Columbia/GV1-97321/2020 | South America / Colombia / Valle del Cauca/2020-04-04 | Instituto Nacional de Salud, Bogotá, Colombia  |
| EPI_ISL_447797 | hCoV-19/Columbia/GV1-97349/2020 | South America / Colombia / Boyacá / Sar/2020-04-04    | Instituto Nacional de Salud, Bogotá, Colombia  |
| EPI_ISL_447798 | hCoV-19/Columbia/GV1-97417/2020 | South America / Colombia / Narino / Ipai/2020-04-04   | Instituto Nacional de Salud, Bogotá, Colombia  |
| EPI_ISL_447799 | hCoV-19/Columbia/GV1-97588/2020 | South America / Colombia / Cesar / Valle/2020-04-04   | Instituto Nacional de Salud, Bogotá, Colombia  |
| EPI_ISL_447800 | hCoV-19/Columbia/GV1-97718/2020 | South America / Colombia / Cundinamarca/2020-04-04    | Instituto Nacional de Salud, Bogotá, Colombia  |
| EPI_ISL_447801 | hCoV-19/Columbia/GV1-97760/2020 | South America / Colombia / Norte de san/2020-04-04    | Instituto Nacional de Salud, Bogotá, Colombia  |
| EPI_ISL_447802 | hCoV-19/Columbia/GV1-97769/2020 | South America / Colombia / Villavicencio/2020-04-04   | Instituto Nacional de Salud, Bogotá, Colombia  |
| EPI_ISL_447803 | hCoV-19/Columbia/GV1-97782/2020 | South America / Colombia / Villavicencio/2020-04-04   | Instituto Nacional de Salud, Bogotá, Colombia  |
| EPI_ISL_447804 | hCoV-19/Columbia/GV1-97783/2020 | South America / Colombia / Villavicencio/2020-04-04   | Instituto Nacional de Salud, Bogotá, Colombia  |
| EPI_ISL_447805 | hCoV-19/Columbia/GV1-97795/2020 | South America / Colombia / Boyacá / Tog/2020-04-04    | Instituto Nacional de Salud, Bogotá, Colombia  |
| EPI_ISL_447806 | hCoV-19/Columbia/GV1-97855/2020 | South America / Colombia / Huila / Nueva/2020-04-04   | Instituto Nacional de Salud, Bogotá, Colombia  |
| EPI_ISL_447807 | hCoV-19/Columbia/GV1-97875/2020 | South America / Colombia / Huila / Nueva/2020-04-04   | Instituto Nacional de Salud, Bogotá, Colombia  |
| EPI_ISL_447808 | hCoV-19/Columbia/GV1-97921/2020 | South America / Colombia / Tolima / Ibagó/2020-04-04  | Instituto Nacional de Salud, Bogotá, Colombia  |
| EPI_ISL_447809 | hCoV-19/Columbia/GV1-98006/2020 | South America / Colombia / Risaralda / P/2020-04-04   | Instituto Nacional de Salud, Bogotá, Colombia  |
| EPI_ISL_447810 | hCoV-19/Columbia/GV1-98011/2020 | South America / Colombia / Risaralda / D/2020-04-05   | Instituto Nacional de Salud, Bogotá, Colombia  |
| EPI_ISL_447811 | hCoV-19/Columbia/GV1-98032/2020 | South America / Colombia / Huila / Nueva/2020-04-05   | Instituto Nacional de Salud, Bogotá, Colombia  |
| EPI_ISL_447812 | hCoV-19/Columbia/GV1-98087/2020 | South America / Colombia / Cundinamarca/2020-04-05    | Instituto Nacional de Salud, Bogotá, Colombia  |
| EPI_ISL_447813 | hCoV-19/Columbia/GV1-98290/2020 | South America / Colombia / Cundinamarca/2020-04-05    | Instituto Nacional de Salud, Bogotá, Colombia  |
| EPI_ISL_447814 | hCoV-19/Columbia/GV197223/2020  | South America / Colombia / Valle del Cauca/2020-04-06 | Instituto Nacional de Salud, Bogotá, Colombia  |
| EPI_ISL_447815 | hCoV-19/Columbia/GV197447/2020  | South America / Colombia / Cundinamarca/2020-04-06    | Instituto Nacional de Salud, Bogotá, Colombia  |
| EPI_ISL_447816 | hCoV-19/Columbia/GV197517/2020  | South America / Colombia / Córdoba / Saka/2020-04-07  | Instituto Nacional de Salud, Bogotá, Colombia  |
| EPI_ISL_447817 | hCoV-19/Columbia/GV197527/2020  | South America / Colombia / Córdoba / M/2020-04-09     | Instituto Nacional de Salud, Bogotá, Colombia  |
| EPI_ISL_447854 | hCoV-19/India/CMBB_J350/2020    | Asia / India / Telangana                              | CSIR-Centre for Cellular and Molecular Biology |
| EPI_ISL_447855 | hCoV-19/India/CMBB_J318/2020    | Asia / India / Telangana                              | CSIR-Centre for Cellular and Molecular Biology |
| EPI_ISL_448222 | hCoV-19/Vietnam/BT-14Mar/2020   | Asia / Vietnam / Ho Chi Minh City                     | Pasteur Institute Ho Chi Minh City             |
| EPI_ISL_450331 | hCoV-19/India/CMBB_J220/2020    | Asia / India / Telangana                              | CSIR-Centre for Cellular and Molecular Biology |
| EPI_ISL_450332 | hCoV-19/India/CMBB_J222/2020    | Asia / India / Telangana                              | CSIR-Centre for Cellular and Molecular Biology |

|                |                                                                        |            |                                                                                                 |                                                                                                              |                                                                                                                                                                                                                                                                                                                                                                                                                                                                                                                                                                                                                                                                                                                                                                                                                                                                                                                                                                                                                                                                                                                                                                                                                                                                                                                                                                                                                                                                                                                                                                                                                                                                               |
|----------------|------------------------------------------------------------------------|------------|-------------------------------------------------------------------------------------------------|--------------------------------------------------------------------------------------------------------------|-------------------------------------------------------------------------------------------------------------------------------------------------------------------------------------------------------------------------------------------------------------------------------------------------------------------------------------------------------------------------------------------------------------------------------------------------------------------------------------------------------------------------------------------------------------------------------------------------------------------------------------------------------------------------------------------------------------------------------------------------------------------------------------------------------------------------------------------------------------------------------------------------------------------------------------------------------------------------------------------------------------------------------------------------------------------------------------------------------------------------------------------------------------------------------------------------------------------------------------------------------------------------------------------------------------------------------------------------------------------------------------------------------------------------------------------------------------------------------------------------------------------------------------------------------------------------------------------------------------------------------------------------------------------------------|
| EPI_ISL_450340 | hCoV-19/Bangladesh/BAJU_CVASU_CTO_502/2/Asia / Bangladesh / Chattogram | 2020-05-13 | Corona (COVID-19) Testing Laboratory and Bangladesh Institute of Tropical & Infectious Diseases | Basic and Applied Research on Jute Project                                                                   | Rasel Ahmed, Md. Sabir Hossain, Shah Md Tamim Kabir, Emadul Mannan Emad, Md. Nazim Hossain, Rafique Ahmed Rana, Farukur Kumer Biswas, M.A Hassan Chowdhury, Md. Shakesh Ahmed, Md. Samiul Haque, Md. Monjurul Alam, Md. Sharifur Rahman, A.S M Anwarul Hoss, Md. Shahidul Islam, Goutam Budha Das, AAMM Zouaer Siddiki                                                                                                                                                                                                                                                                                                                                                                                                                                                                                                                                                                                                                                                                                                                                                                                                                                                                                                                                                                                                                                                                                                                                                                                                                                                                                                                                                        |
| EPI_ISL_450341 | hCoV-19/Bangladesh/BAJU_CVASU_CTO_503/2/Asia / Bangladesh / Chattogram | 2020-05-13 | unknown                                                                                         | Basic and Applied Research on Jute Project                                                                   | Md. Sabir Hossain, Rasel Ahmed, Shah Md Tamim Kabir, Emadul Mannan Emad, Md. Nazim Hossain, Rafique Ahmed Rana, Farukur Kumer Biswas, M.A Hassan Chowdhury, Md. Shakesh Ahmed, Md. Samiul Haque, Md. Monjurul Alam, Md. Sharifur Rahman, A.S M Anwarul Hoss, Md. Shahidul Islam, Goutam Budha Das, AAMM Zouaer Siddiki                                                                                                                                                                                                                                                                                                                                                                                                                                                                                                                                                                                                                                                                                                                                                                                                                                                                                                                                                                                                                                                                                                                                                                                                                                                                                                                                                        |
| EPI_ISL_450342 | hCoV-19/Bangladesh/BAJU_CVASU_CTO_506/2/Asia / Bangladesh / Chattogram | 2020-05-08 | Corona (COVID-19) Testing Laboratory and Bangladesh Institute of Tropical & Infectious Diseases | Basic and Applied Research on Jute Project                                                                   | Rasel Ahmed, Md. Sabir Hossain, Shah Md Tamim Kabir, Emadul Mannan Emad, Md. Nazim Hossain, Rafique Ahmed Rana, Farukur Kumer Biswas, M.A Hassan Chowdhury, Md. Shakesh Ahmed, Md. Samiul Haque, Md. Monjurul Alam, Md. Sharifur Rahman, A.S M Anwarul Hoss, Md. Shahidul Islam, Goutam Budha Das, AAMM Zouaer Siddiki                                                                                                                                                                                                                                                                                                                                                                                                                                                                                                                                                                                                                                                                                                                                                                                                                                                                                                                                                                                                                                                                                                                                                                                                                                                                                                                                                        |
| EPI_ISL_450343 | hCoV-19/Bangladesh/BAJU_CVASU_CTO_511/2/Asia / Bangladesh / Chattogram | 2020-05-09 | Corona (COVID-19) Testing Laboratory and Bangladesh Institute of Tropical & Infectious Diseases | Basic and Applied Research on Jute Project                                                                   | Md. Sabir Hossain, Rasel Ahmed, Shah Md Tamim Kabir, Emadul Mannan Emad, Md. Nazim Hossain, Rafique Ahmed Rana, Farukur Kumer Biswas, M.A Hassan Chowdhury, Md. Shakesh Ahmed, Md. Samiul Haque, Md. Monjurul Alam, Md. Sharifur Rahman, A.S M Anwarul Hoss, Md. Shahidul Islam, Goutam Budha Das, AAMM Zouaer Siddiki                                                                                                                                                                                                                                                                                                                                                                                                                                                                                                                                                                                                                                                                                                                                                                                                                                                                                                                                                                                                                                                                                                                                                                                                                                                                                                                                                        |
| EPI_ISL_450508 | hCoV-19/Lebanon/S1_759/2020                                            | 2020-03-04 | Rafik Hariri University Hospital                                                                | Rafik Hariri University Hospital                                                                             | Rita Feghali                                                                                                                                                                                                                                                                                                                                                                                                                                                                                                                                                                                                                                                                                                                                                                                                                                                                                                                                                                                                                                                                                                                                                                                                                                                                                                                                                                                                                                                                                                                                                                                                                                                                  |
| EPI_ISL_450509 | hCoV-19/Lebanon/S2_759/2020                                            | 2020-03-15 | Rafik Hariri University Hospital                                                                | Rafik Hariri University Hospital                                                                             | Rita Feghali                                                                                                                                                                                                                                                                                                                                                                                                                                                                                                                                                                                                                                                                                                                                                                                                                                                                                                                                                                                                                                                                                                                                                                                                                                                                                                                                                                                                                                                                                                                                                                                                                                                                  |
| EPI_ISL_450510 | hCoV-19/Lebanon/S3_769/2020                                            | 2020-03-04 | Rafik Hariri University Hospital                                                                | Rafik Hariri University Hospital                                                                             | Rita Feghali                                                                                                                                                                                                                                                                                                                                                                                                                                                                                                                                                                                                                                                                                                                                                                                                                                                                                                                                                                                                                                                                                                                                                                                                                                                                                                                                                                                                                                                                                                                                                                                                                                                                  |
| EPI_ISL_450511 | hCoV-19/Lebanon/S4_781/2020                                            | 2020-03-04 | Rafik Hariri University Hospital                                                                | Rafik Hariri University Hospital                                                                             | Rita Feghali                                                                                                                                                                                                                                                                                                                                                                                                                                                                                                                                                                                                                                                                                                                                                                                                                                                                                                                                                                                                                                                                                                                                                                                                                                                                                                                                                                                                                                                                                                                                                                                                                                                                  |
| EPI_ISL_450512 | hCoV-19/Lebanon/S5_762/2020                                            | 2020-02-27 | Rafik Hariri University Hospital                                                                | Rafik Hariri University Hospital                                                                             | Rita Feghali                                                                                                                                                                                                                                                                                                                                                                                                                                                                                                                                                                                                                                                                                                                                                                                                                                                                                                                                                                                                                                                                                                                                                                                                                                                                                                                                                                                                                                                                                                                                                                                                                                                                  |
| EPI_ISL_450513 | hCoV-19/Lebanon/S6_766/2020                                            | 2020-03-09 | Rafik Hariri University Hospital                                                                | Rafik Hariri University Hospital                                                                             | Rita Feghali                                                                                                                                                                                                                                                                                                                                                                                                                                                                                                                                                                                                                                                                                                                                                                                                                                                                                                                                                                                                                                                                                                                                                                                                                                                                                                                                                                                                                                                                                                                                                                                                                                                                  |
| EPI_ISL_450514 | hCoV-19/Lebanon/S7_767/2020                                            | 2020-03-13 | Rafik Hariri University Hospital                                                                | Rafik Hariri University Hospital                                                                             | Rita Feghali                                                                                                                                                                                                                                                                                                                                                                                                                                                                                                                                                                                                                                                                                                                                                                                                                                                                                                                                                                                                                                                                                                                                                                                                                                                                                                                                                                                                                                                                                                                                                                                                                                                                  |
| EPI_ISL_450515 | hCoV-19/Lebanon/S8_764/2020                                            | 2020-03-11 | Rafik Hariri University Hospital                                                                | Rafik Hariri University Hospital                                                                             | Rita Feghali                                                                                                                                                                                                                                                                                                                                                                                                                                                                                                                                                                                                                                                                                                                                                                                                                                                                                                                                                                                                                                                                                                                                                                                                                                                                                                                                                                                                                                                                                                                                                                                                                                                                  |
| EPI_ISL_450516 | hCoV-19/Lebanon/S10_768/2020                                           | 2020-03-15 | Rafik Hariri University Hospital                                                                | Rafik Hariri University Hospital                                                                             | Rita Feghali                                                                                                                                                                                                                                                                                                                                                                                                                                                                                                                                                                                                                                                                                                                                                                                                                                                                                                                                                                                                                                                                                                                                                                                                                                                                                                                                                                                                                                                                                                                                                                                                                                                                  |
| EPI_ISL_450517 | hCoV-19/Lebanon/S11_765/2020                                           | 2020-03-09 | Rafik Hariri University Hospital                                                                | Rafik Hariri University Hospital                                                                             | Rita Feghali                                                                                                                                                                                                                                                                                                                                                                                                                                                                                                                                                                                                                                                                                                                                                                                                                                                                                                                                                                                                                                                                                                                                                                                                                                                                                                                                                                                                                                                                                                                                                                                                                                                                  |
| EPI_ISL_451078 | hCoV-19/Sichuan/SC-WCH2-006/2020                                       | 2020-02-08 | West China Hospital of Sichuan University                                                       | State Key Laboratory of Biotherapy of Sichuan University                                                     | Baowen Du, Minjun Wang, Chao Tang, Chuan Chen, Yongzhao Zhou, Mingqia Yu, Han-Cheng Wei, Weimin Li, Jing-wen Lin, Ji Geng, Bing-Ying, Lu Cao                                                                                                                                                                                                                                                                                                                                                                                                                                                                                                                                                                                                                                                                                                                                                                                                                                                                                                                                                                                                                                                                                                                                                                                                                                                                                                                                                                                                                                                                                                                                  |
| EPI_ISL_451149 | hCoV-19/India/GJRC104/2020                                             | 2020-05-07 | M.P Shah Government Medical college Jamnagar                                                    | Gujarat Biotechnology Research Centre                                                                        | Jarini Ravat, Zama Patel, Monika Gandhi, Pinal Trivedi, Mahesh Pandya, Amit Kanani, Nidhi Patel, Nish Savaliya, Raghavendra Kumar, Dinesh Kumar, Zuber Sayed, Komal Patel, Labhi Pandya, Snehal Bagatharia, Ramesh Pandit, Tejas Shah, Ankil Hirsu, Prithesh Sabara, Apurvash Puvir, Brinda Aring, Bhavesh Modi, Gaurishanker Shirmali, R D Dixit, A.M Kadi, Pili Pandita, Chaitanya Joshi, Madhvi Joshi, Zama Patel, Monika Gandhi, Pinal Trivedi, Mahesh Pandya, Amit Kanani, Nidhi Patel, Nish Savaliya, Raghavendra Kumar, Dinesh Kumar, Zuber Sayed, Komal Patel, Labhi Pandya, Snehal Bagatharia, Ramesh Pandit, Tejas Shah, Ankil Hirsu, Prithesh Sabara, Apurvash Puvir, Brinda Aring, Jarini Ravat, Zama Patel, Bhavesh Modi, Gaurishanker Shirmali, R D Dixit, A.M Kadi, Praga Sharma, Chaitanya Joshi, Madhvi Joshi, Monika Gandhi, Pinal Trivedi, Mahesh Pandya, Amit Kanani, Nidhi Patel, Nish Savaliya, Raghavendra Kumar, Dinesh Kumar, Zuber Sayed, Komal Patel, Labhi Pandya, Snehal Bagatharia, Ramesh Pandit, Tejas Shah, Ankil Hirsu, Prithesh Sabara, Apurvash Puvir, Brinda Aring, Jarini Ravat, Zama Patel, Bhavesh Modi, Gaurishanker Shirmali, R D Dixit, A.M Kadi, Alzal Ansari, Chaitanya Joshi, Madhvi Joshi, Nidhi Patel, Nish Savaliya, Raghavendra Kumar, Dinesh Kumar, Zuber Sayed, Komal Patel, Labhi Pandya, Snehal Bagatharia, Ramesh Pandit, Tejas Shah, Ankil Hirsu, Prithesh Sabara, Apurvash Puvir, Jarini Ravat, Zama Patel, Monika Gandhi, Pinal Trivedi, Mahesh Pandya, Manish Pattani, Tanuja Javadekar, Amit Kanani, Bhavesh Modi, Gaurishanker Shirmali, R D Dixit, A.M Kadi, Camella Chakraborty, Chaitanya Joshi, Madhvi Joshi |
| EPI_ISL_451150 | hCoV-19/India/GJRC105/2020                                             | 2020-05-06 | M.P Shah Government Medical college Jamnagar                                                    | Gujarat Biotechnology Research Centre                                                                        | Nidhi Patel, Nish Savaliya, Raghavendra Kumar, Dinesh Kumar, Zuber Sayed, Komal Patel, Labhi Pandya, Snehal Bagatharia, Ramesh Pandit, Tejas Shah, Ankil Hirsu, Prithesh Sabara, Apurvash Puvir, Brinda Aring, Jarini Ravat, Zama Patel, Bhavesh Modi, Gaurishanker Shirmali, R D Dixit, A.M Kadi, Neha Rajpara, Chaitanya Joshi, Madhvi Joshi, Pinal Trivedi, Mahesh Pandya, Amit Kanani, Nidhi Patel, Nish Savaliya, Raghavendra Kumar, Dinesh Kumar, Zuber Sayed, Komal Patel, Labhi Pandya, Snehal Bagatharia, Ramesh Pandit, Tejas Shah, Ankil Hirsu, Prithesh Sabara, Apurvash Puvir, Brinda Aring, Jarini Ravat, Zama Patel, Bhavesh Modi, Gaurishanker Shirmali, R D Dixit, A.M Kadi, Alzal Ansari, Chaitanya Joshi, Madhvi Joshi, Nidhi Patel, Nish Savaliya, Raghavendra Kumar, Dinesh Kumar, Zuber Sayed, Komal Patel, Labhi Pandya, Snehal Bagatharia, Ramesh Pandit, Tejas Shah, Ankil Hirsu, Prithesh Sabara, Apurvash Puvir, Jarini Ravat, Zama Patel, Monika Gandhi, Pinal Trivedi, Mahesh Pandya, Manish Pattani, Tanuja Javadekar, Amit Kanani, Bhavesh Modi, Gaurishanker Shirmali, R D Dixit, A.M Kadi, Siddhanti Kumar, Chaitanya Joshi, Madhvi Joshi                                                                                                                                                                                                                                                                                                                                                                                                                                                                                                    |
| EPI_ISL_451151 | hCoV-19/India/GJRC106/2020                                             | 2020-05-05 | M.P Shah Government Medical college Jamnagar                                                    | Gujarat Biotechnology Research Centre                                                                        | Nidhi Patel, Nish Savaliya, Raghavendra Kumar, Dinesh Kumar, Zuber Sayed, Komal Patel, Labhi Pandya, Snehal Bagatharia, Ramesh Pandit, Tejas Shah, Ankil Hirsu, Prithesh Sabara, Apurvash Puvir, Jarini Ravat, Zama Patel, Bhavesh Modi, Gaurishanker Shirmali, R D Dixit, A.M Kadi, Alzal Ansari, Chaitanya Joshi, Madhvi Joshi, Nidhi Patel, Nish Savaliya, Raghavendra Kumar, Dinesh Kumar, Zuber Sayed, Komal Patel, Labhi Pandya, Snehal Bagatharia, Ramesh Pandit, Tejas Shah, Ankil Hirsu, Prithesh Sabara, Apurvash Puvir, Brinda Aring, Jarini Ravat, Zama Patel, Bhavesh Modi, Gaurishanker Shirmali, R D Dixit, A.M Kadi, Neha Rajpara, Chaitanya Joshi, Madhvi Joshi, Pinal Trivedi, Mahesh Pandya, Amit Kanani, Nidhi Patel, Nish Savaliya, Raghavendra Kumar, Dinesh Kumar, Zuber Sayed, Komal Patel, Labhi Pandya, Snehal Bagatharia, Ramesh Pandit, Tejas Shah, Ankil Hirsu, Prithesh Sabara, Apurvash Puvir, Brinda Aring, Jarini Ravat, Zama Patel, Bhavesh Modi, Gaurishanker Shirmali, R D Dixit, A.M Kadi, Siddhanti Kumar, Chaitanya Joshi, Madhvi Joshi                                                                                                                                                                                                                                                                                                                                                                                                                                                                                                                                                                                                |
| EPI_ISL_451152 | hCoV-19/India/GJRC107/2020                                             | 2020-05-09 | M.P Shah Government Medical college Jamnagar                                                    | Gujarat Biotechnology Research Centre                                                                        | Nidhi Patel, Nish Savaliya, Raghavendra Kumar, Dinesh Kumar, Zuber Sayed, Komal Patel, Labhi Pandya, Snehal Bagatharia, Ramesh Pandit, Tejas Shah, Ankil Hirsu, Prithesh Sabara, Apurvash Puvir, Brinda Aring, Jarini Ravat, Zama Patel, Bhavesh Modi, Gaurishanker Shirmali, R D Dixit, A.M Kadi, Alzal Ansari, Chaitanya Joshi, Madhvi Joshi, Nidhi Patel, Nish Savaliya, Raghavendra Kumar, Dinesh Kumar, Zuber Sayed, Komal Patel, Labhi Pandya, Snehal Bagatharia, Ramesh Pandit, Tejas Shah, Ankil Hirsu, Prithesh Sabara, Apurvash Puvir, Jarini Ravat, Zama Patel, Monika Gandhi, Pinal Trivedi, Mahesh Pandya, Manish Pattani, Tanuja Javadekar, Amit Kanani, Bhavesh Modi, Gaurishanker Shirmali, R D Dixit, A.M Kadi, Camella Chakraborty, Chaitanya Joshi, Madhvi Joshi                                                                                                                                                                                                                                                                                                                                                                                                                                                                                                                                                                                                                                                                                                                                                                                                                                                                                           |
| EPI_ISL_451157 | hCoV-19/India/GJRC112/2020                                             | 2020-05-02 | Government Medical College, Vadodara                                                            | Gujarat Biotechnology Research Centre                                                                        | Nidhi Patel, Nish Savaliya, Raghavendra Kumar, Dinesh Kumar, Zuber Sayed, Komal Patel, Labhi Pandya, Snehal Bagatharia, Ramesh Pandit, Tejas Shah, Ankil Hirsu, Prithesh Sabara, Apurvash Puvir, Jarini Ravat, Zama Patel, Bhavesh Modi, Gaurishanker Shirmali, R D Dixit, A.M Kadi, Siddhanti Kumar, Chaitanya Joshi, Madhvi Joshi                                                                                                                                                                                                                                                                                                                                                                                                                                                                                                                                                                                                                                                                                                                                                                                                                                                                                                                                                                                                                                                                                                                                                                                                                                                                                                                                           |
| EPI_ISL_451158 | hCoV-19/India/GJRC113/2020                                             | 2020-05-03 | Government Medical College, Vadodara                                                            | Gujarat Biotechnology Research Centre                                                                        | Nidhi Patel, Nish Savaliya, Raghavendra Kumar, Dinesh Kumar, Zuber Sayed, Komal Patel, Labhi Pandya, Snehal Bagatharia, Ramesh Pandit, Tejas Shah, Ankil Hirsu, Prithesh Sabara, Apurvash Puvir, Jarini Ravat, Zama Patel, Bhavesh Modi, Gaurishanker Shirmali, R D Dixit, A.M Kadi, Siddhanti Kumar, Chaitanya Joshi, Madhvi Joshi                                                                                                                                                                                                                                                                                                                                                                                                                                                                                                                                                                                                                                                                                                                                                                                                                                                                                                                                                                                                                                                                                                                                                                                                                                                                                                                                           |
| EPI_ISL_451161 | hCoV-19/India/GJRC116/2020                                             | 2020-05-03 | Government Medical College, Vadodara                                                            | Gujarat Biotechnology Research Centre                                                                        | Nidhi Patel, Nish Savaliya, Raghavendra Kumar, Dinesh Kumar, Zuber Sayed, Komal Patel, Labhi Pandya, Snehal Bagatharia, Ramesh Pandit, Tejas Shah, Ankil Hirsu, Prithesh Sabara, Apurvash Puvir, Jarini Ravat, Zama Patel, Bhavesh Modi, Gaurishanker Shirmali, R D Dixit, A.M Kadi, Siddhanti Kumar, Chaitanya Joshi, Madhvi Joshi                                                                                                                                                                                                                                                                                                                                                                                                                                                                                                                                                                                                                                                                                                                                                                                                                                                                                                                                                                                                                                                                                                                                                                                                                                                                                                                                           |
| EPI_ISL_451162 | hCoV-19/India/GJRC117/2020                                             | 2020-05-03 | Government Medical College, Vadodara                                                            | Gujarat Biotechnology Research Centre                                                                        | Nidhi Patel, Nish Savaliya, Raghavendra Kumar, Dinesh Kumar, Zuber Sayed, Komal Patel, Labhi Pandya, Snehal Bagatharia, Ramesh Pandit, Tejas Shah, Ankil Hirsu, Prithesh Sabara, Apurvash Puvir, Jarini Ravat, Zama Patel, Bhavesh Modi, Gaurishanker Shirmali, R D Dixit, A.M Kadi, Siddhanti Kumar, Chaitanya Joshi, Madhvi Joshi                                                                                                                                                                                                                                                                                                                                                                                                                                                                                                                                                                                                                                                                                                                                                                                                                                                                                                                                                                                                                                                                                                                                                                                                                                                                                                                                           |
| EPI_ISL_451662 | hCoV-19/Poland/Sla20/2020                                              | 2020-05-05 | State Sanitary Inspectorate                                                                     | Laboratory of Recombinant Vaccines                                                                           | Lukasz Rabalski, Boguslaw Szewczyk, Krystyna Bienkowska-Szewczyk, Jarostaw Pinkas                                                                                                                                                                                                                                                                                                                                                                                                                                                                                                                                                                                                                                                                                                                                                                                                                                                                                                                                                                                                                                                                                                                                                                                                                                                                                                                                                                                                                                                                                                                                                                                             |
| EPI_ISL_451663 | hCoV-19/Poland/Sla20/2020                                              | 2020-05-05 | State Sanitary Inspectorate                                                                     | Laboratory of Recombinant Vaccines                                                                           | Lukasz Rabalski, Boguslaw Szewczyk, Krystyna Bienkowska-Szewczyk, Jarostaw Pinkas                                                                                                                                                                                                                                                                                                                                                                                                                                                                                                                                                                                                                                                                                                                                                                                                                                                                                                                                                                                                                                                                                                                                                                                                                                                                                                                                                                                                                                                                                                                                                                                             |
| EPI_ISL_451664 | hCoV-19/Poland/Sla20/2020                                              | 2020-05-05 | State Sanitary Inspectorate                                                                     | Laboratory of Recombinant Vaccines                                                                           | Lukasz Rabalski, Boguslaw Szewczyk, Krystyna Bienkowska-Szewczyk, Jarostaw Pinkas                                                                                                                                                                                                                                                                                                                                                                                                                                                                                                                                                                                                                                                                                                                                                                                                                                                                                                                                                                                                                                                                                                                                                                                                                                                                                                                                                                                                                                                                                                                                                                                             |
| EPI_ISL_451666 | hCoV-19/India/GJRC103/2020                                             | 2020-05-04 | M.P Shah Government Medical college Jamnagar                                                    | Gujarat Biotechnology Research Centre                                                                        | Brinda Aring, Jarini Ravat, Zama Patel, Monika Gandhi, Pinal Trivedi, Mahesh Pandya, Amit Kanani, Nidhi Patel, Nish Savaliya, Raghavendra Kumar, Dinesh Kumar, Zuber Sayed, Komal Patel, Labhi Pandya, Snehal Bagatharia, Ramesh Pandit, Tejas Shah, Ankil Hirsu, Prithesh Sabara, Apurvash Puvir, Brinda Aring, Jarini Ravat, Zama Patel, Bhavesh Modi, Gaurishanker Shirmali, R D Dixit, A.M Kadi, Alkalaka Verma, Chaitanya Joshi, Madhvi Joshi                                                                                                                                                                                                                                                                                                                                                                                                                                                                                                                                                                                                                                                                                                                                                                                                                                                                                                                                                                                                                                                                                                                                                                                                                            |
| EPI_ISL_451934 | hCoV-19/Croatia/ZG-297-20-2020                                         | 2020-03-05 | Research Unit, University Hospital for Infectious Diseases "Dr. Fra Mihaljevic"                 | Coin Sain lab, Helmholtz Centre for Infection Research                                                       | Zeehan Chaudhry, Kathrin Eschke, Zekja Matak Sarkanic, Ivan Christian Kuruti                                                                                                                                                                                                                                                                                                                                                                                                                                                                                                                                                                                                                                                                                                                                                                                                                                                                                                                                                                                                                                                                                                                                                                                                                                                                                                                                                                                                                                                                                                                                                                                                  |
| EPI_ISL_451935 | hCoV-19/Belgium/20A30/2020                                             | 2020-03-18 | CUB Hospital Erasme Laboratoire d'Anatomie Pathologique                                         | CUB Hospital Erasme Laboratoire d'Anatomie Pathologique                                                      | Prof. Isabelle Salmon, Dr. Nicky D'Haene                                                                                                                                                                                                                                                                                                                                                                                                                                                                                                                                                                                                                                                                                                                                                                                                                                                                                                                                                                                                                                                                                                                                                                                                                                                                                                                                                                                                                                                                                                                                                                                                                                      |
| EPI_ISL_451961 | hCoV-19/Italy/IZSPB_CL1/2020                                           | 2020-03-14 | Istituto Zooprofilattico Sperimentale Puglia e Basilicata                                       | Beonabiol (Bioinformatics Evolution and Comparative Genomics lab), Dept of Biosciences, University of Milan  | Parisi A., Pesole G., Manzani C., Chiara M.                                                                                                                                                                                                                                                                                                                                                                                                                                                                                                                                                                                                                                                                                                                                                                                                                                                                                                                                                                                                                                                                                                                                                                                                                                                                                                                                                                                                                                                                                                                                                                                                                                   |
| EPI_ISL_451962 | hCoV-19/Italy/IZSPB_1259/2020                                          | 2020-03-20 | Istituto Zooprofilattico Sperimentale Puglia e Basilicata                                       | Beonabiol (Bioinformatics, Evolution and Comparative Genomics lab), Dept of Biosciences, University of Milan | Parisi A., Pesole G., Manzani C., Chiara M.                                                                                                                                                                                                                                                                                                                                                                                                                                                                                                                                                                                                                                                                                                                                                                                                                                                                                                                                                                                                                                                                                                                                                                                                                                                                                                                                                                                                                                                                                                                                                                                                                                   |
| EPI_ISL_452139 | hCoV-19/Mexico/CMX-hORE_07/2020                                        | 2020-02-28 | Instituto de Diagnostico y Referencia Epidemiologicos (NDRE)                                    | Instituto de diagnóstico y Referencia Epidemiologicos (NDRE)                                                 | Ramirez-Gonzalez Ernesto, Garces-Ayala Fabiola, Aranza-Rodriguez Adrian, Mendel-Condado Edgar, Rodriguez-Maldonado Arli, Wong-Arambula Claudia, Barres-Badillo Gabriela, Hernandez-Rivas Lucia, Lopez-Martinez Irma                                                                                                                                                                                                                                                                                                                                                                                                                                                                                                                                                                                                                                                                                                                                                                                                                                                                                                                                                                                                                                                                                                                                                                                                                                                                                                                                                                                                                                                           |
| EPI_ISL_452140 | hCoV-19/Belgium/20A42/2020                                             | 2020-04-03 | CUB Hospital Erasme Laboratoire d'Anatomie Pathologique                                         | CUB Hospital Erasme Laboratoire d'Anatomie Pathologique                                                      | Isabelle Salmon, Nicky D'Haene                                                                                                                                                                                                                                                                                                                                                                                                                                                                                                                                                                                                                                                                                                                                                                                                                                                                                                                                                                                                                                                                                                                                                                                                                                                                                                                                                                                                                                                                                                                                                                                                                                                |
| EPI_ISL_452141 | hCoV-19/Mexico/CMX-hORE_08/2020                                        | 2020-03-11 | Instituto de Diagnostico y Referencia Epidemiologicos (NDRE)                                    | Instituto de diagnóstico y Referencia Epidemiologicos (NDRE)                                                 | Ramirez-Gonzalez Ernesto, Garces-Ayala Fabiola, Aranza-Rodriguez Adrian, Mendel-Condado Edgar, Rodriguez-Maldonado Arli, Wong-Arambula Claudia, Barres-Badillo Gabriela, Hernandez-Rivas Lucia, Lopez-Martinez Irma                                                                                                                                                                                                                                                                                                                                                                                                                                                                                                                                                                                                                                                                                                                                                                                                                                                                                                                                                                                                                                                                                                                                                                                                                                                                                                                                                                                                                                                           |
| EPI_ISL_452142 | hCoV-19/Belgium/20A37/2020                                             | 2020-03-30 | CUB Hospital Erasme Laboratoire d'Anatomie Pathologique                                         | CUB Hospital Erasme Laboratoire d'Anatomie Pathologique                                                      | Isabelle Salmon, Nicky D'Haene                                                                                                                                                                                                                                                                                                                                                                                                                                                                                                                                                                                                                                                                                                                                                                                                                                                                                                                                                                                                                                                                                                                                                                                                                                                                                                                                                                                                                                                                                                                                                                                                                                                |
| EPI_ISL_452143 | hCoV-19/Belgium/20A38/2020                                             | 2020-04-01 | CUB Hospital Erasme Laboratoire d'Anatomie Pathologique                                         | CUB Hospital Erasme Laboratoire d'Anatomie Pathologique                                                      | Isabelle Salmon, Nicky D'Haene                                                                                                                                                                                                                                                                                                                                                                                                                                                                                                                                                                                                                                                                                                                                                                                                                                                                                                                                                                                                                                                                                                                                                                                                                                                                                                                                                                                                                                                                                                                                                                                                                                                |
| EPI_ISL_452144 | hCoV-19/Belgium/20A44/2020                                             | 2020-04-09 | CUB Hospital Erasme Laboratoire d'Anatomie Pathologique                                         | CUB Hospital Erasme Laboratoire d'Anatomie Pathologique                                                      | Isabelle Salmon, Nicky D'Haene                                                                                                                                                                                                                                                                                                                                                                                                                                                                                                                                                                                                                                                                                                                                                                                                                                                                                                                                                                                                                                                                                                                                                                                                                                                                                                                                                                                                                                                                                                                                                                                                                                                |
| EPI_ISL_452150 | hCoV-19/Belgium/20A47/2020                                             | 2020-04-10 | CUB Hospital Erasme Laboratoire d'Anatomie Pathologique                                         | CUB Hospital Erasme Laboratoire d'Anatomie Pathologique                                                      | Prof. Isabelle Salmon, Dr. Nicky D'Haene                                                                                                                                                                                                                                                                                                                                                                                                                                                                                                                                                                                                                                                                                                                                                                                                                                                                                                                                                                                                                                                                                                                                                                                                                                                                                                                                                                                                                                                                                                                                                                                                                                      |
| EPI_ISL_452151 | hCoV-19/Belgium/20A49/2020                                             | 2020-04-14 | CUB Hospital Erasme Laboratoire d'Anatomie Pathologique                                         | CUB Hospital Erasme Laboratoire d'Anatomie Pathologique                                                      | Prof. Isabelle Salmon, Dr. Nicky D'Haene                                                                                                                                                                                                                                                                                                                                                                                                                                                                                                                                                                                                                                                                                                                                                                                                                                                                                                                                                                                                                                                                                                                                                                                                                                                                                                                                                                                                                                                                                                                                                                                                                                      |
| EPI_ISL_452152 | hCoV-19/Belgium/20A55/2020                                             | 2020-04-20 | CUB Hospital Erasme Laboratoire d'Anatomie Pathologique                                         | CUB Hospital Erasme Laboratoire d'Anatomie Pathologique                                                      | Prof. Isabelle Salmon, Dr. Nicky D'Haene                                                                                                                                                                                                                                                                                                                                                                                                                                                                                                                                                                                                                                                                                                                                                                                                                                                                                                                                                                                                                                                                                                                                                                                                                                                                                                                                                                                                                                                                                                                                                                                                                                      |
| EPI_ISL_452153 | hCoV-19/India/NV-10380/2020                                            | 2020-04-16 | NIV Influenza                                                                                   | NIV Influenza                                                                                                | Polder V                                                                                                                                                                                                                                                                                                                                                                                                                                                                                                                                                                                                                                                                                                                                                                                                                                                                                                                                                                                                                                                                                                                                                                                                                                                                                                                                                                                                                                                                                                                                                                                                                                                                      |
| EPI_ISL_452154 | hCoV-19/India/NV-10419/2020                                            | 2020-04-16 | NIV Influenza                                                                                   | NIV Influenza                                                                                                | Polder V                                                                                                                                                                                                                                                                                                                                                                                                                                                                                                                                                                                                                                                                                                                                                                                                                                                                                                                                                                                                                                                                                                                                                                                                                                                                                                                                                                                                                                                                                                                                                                                                                                                                      |
| EPI_ISL_452155 | hCoV-19/India/NV-11677/2020                                            | 2020-04-19 | NIV Influenza                                                                                   | NIV Influenza                                                                                                | Polder V                                                                                                                                                                                                                                                                                                                                                                                                                                                                                                                                                                                                                                                                                                                                                                                                                                                                                                                                                                                                                                                                                                                                                                                                                                                                                                                                                                                                                                                                                                                                                                                                                                                                      |
| EPI_ISL_452156 | hCoV-19/India/NV-11681/2020                                            | 2020-04-19 | NIV Influenza                                                                                   | NIV Influenza                                                                                                | Polder V                                                                                                                                                                                                                                                                                                                                                                                                                                                                                                                                                                                                                                                                                                                                                                                                                                                                                                                                                                                                                                                                                                                                                                                                                                                                                                                                                                                                                                                                                                                                                                                                                                                                      |
| EPI_ISL_452157 | hCoV-19/India/NV-11683/2020                                            | 2020-04-19 | NIV Influenza                                                                                   | NIV Influenza                                                                                                | Polder V                                                                                                                                                                                                                                                                                                                                                                                                                                                                                                                                                                                                                                                                                                                                                                                                                                                                                                                                                                                                                                                                                                                                                                                                                                                                                                                                                                                                                                                                                                                                                                                                                                                                      |
| EPI_ISL_452158 | hCoV-19/India/NV-11687/2020                                            | 2020-04-19 | NIV Influenza                                                                                   | NIV Influenza                                                                                                | Polder V                                                                                                                                                                                                                                                                                                                                                                                                                                                                                                                                                                                                                                                                                                                                                                                                                                                                                                                                                                                                                                                                                                                                                                                                                                                                                                                                                                                                                                                                                                                                                                                                                                                                      |
| EPI_ISL_452159 | hCoV-19/India/NV-11855/2020                                            | 2020-04-20 | NIV Influenza                                                                                   | NIV Influenza                                                                                                | Polder V                                                                                                                                                                                                                                                                                                                                                                                                                                                                                                                                                                                                                                                                                                                                                                                                                                                                                                                                                                                                                                                                                                                                                                                                                                                                                                                                                                                                                                                                                                                                                                                                                                                                      |
| EPI_ISL_452160 | hCoV-19/India/NV-12019/2020                                            | 2020-04-20 | NIV Influenza                                                                                   | NIV Influenza                                                                                                | Polder V                                                                                                                                                                                                                                                                                                                                                                                                                                                                                                                                                                                                                                                                                                                                                                                                                                                                                                                                                                                                                                                                                                                                                                                                                                                                                                                                                                                                                                                                                                                                                                                                                                                                      |
| EPI_ISL_452327 | hCoV-19/Beijing/DT-travelAT01/2020                                     | 2020-03-13 | Laboratory of Infectious Diseases Center of Beijing Ditan Hospital                              | Laboratory of Infectious Diseases Center of Beijing Ditan Hospital                                           | Siyan Yang, Chengjie Jie, Fengting Yu, Yunxia Tang, Liting Yan, Linghang Wang                                                                                                                                                                                                                                                                                                                                                                                                                                                                                                                                                                                                                                                                                                                                                                                                                                                                                                                                                                                                                                                                                                                                                                                                                                                                                                                                                                                                                                                                                                                                                                                                 |
| EPI_ISL_452328 | hCoV-19/Beijing/DT-travelPMK01/2020                                    | 2020-03-16 | Laboratory of Infectious Diseases Center of Beijing Ditan Hospital                              | Laboratory of Infectious Diseases Center of Beijing Ditan Hospital                                           | Siyan Yang, Chengjie Jie, Fengting Yu, Yunxia Tang, Liting Yan, Linghang Wang                                                                                                                                                                                                                                                                                                                                                                                                                                                                                                                                                                                                                                                                                                                                                                                                                                                                                                                                                                                                                                                                                                                                                                                                                                                                                                                                                                                                                                                                                                                                                                                                 |
| EPI_ISL_452329 | hCoV-19/Beijing/DT-travelDE01/2020                                     | 2020-03-13 | Laboratory of Infectious Diseases Center of Beijing Ditan Hospital                              | Laboratory of Infectious Diseases Center of Beijing Ditan Hospital                                           | Siyan Yang, Chengjie Jie, Fengting Yu, Yunxia Tang, Liting Yan, Linghang Wang                                                                                                                                                                                                                                                                                                                                                                                                                                                                                                                                                                                                                                                                                                                                                                                                                                                                                                                                                                                                                                                                                                                                                                                                                                                                                                                                                                                                                                                                                                                                                                                                 |
| EPI_ISL_452330 | hCoV-19/Beijing/DT-travelFR01/2020                                     | 2020-03-21 | Laboratory of Infectious Diseases Center of Beijing Ditan Hospital                              | Laboratory of Infectious Diseases Center of Beijing Ditan Hospital                                           | Siyan Yang, Chengjie Jie, Fengting Yu, Yunxia Tang, Liting Yan, Linghang Wang                                                                                                                                                                                                                                                                                                                                                                                                                                                                                                                                                                                                                                                                                                                                                                                                                                                                                                                                                                                                                                                                                                                                                                                                                                                                                                                                                                                                                                                                                                                                                                                                 |
| EPI_ISL_452331 | hCoV-19/Beijing/DT-travelCA02/2020                                     | 2020-03-12 | Laboratory of Infectious Diseases Center of Beijing Ditan Hospital                              | Laboratory of Infectious Diseases Center of Beijing Ditan Hospital                                           | Siyan Yang, Chengjie Jie, Fengting Yu, Yunxia Tang, Liting Yan, Linghang Wang                                                                                                                                                                                                                                                                                                                                                                                                                                                                                                                                                                                                                                                                                                                                                                                                                                                                                                                                                                                                                                                                                                                                                                                                                                                                                                                                                                                                                                                                                                                                                                                                 |
| EPI_ISL_452332 | hCoV-19/Beijing/DT-travelUSA01/2020                                    | 2020-02-29 | Laboratory of Infectious Diseases Center of Beijing Ditan Hospital                              | Laboratory of Infectious Diseases Center of Beijing Ditan Hospital                                           | Siyan Yang, Chengjie Jie, Fengting Yu, Yunxia Tang, Liting Yan, Linghang Wang                                                                                                                                                                                                                                                                                                                                                                                                                                                                                                                                                                                                                                                                                                                                                                                                                                                                                                                                                                                                                                                                                                                                                                                                                                                                                                                                                                                                                                                                                                                                                                                                 |
| EPI_ISL_452333 | hCoV-19/Beijing/DT-travelRI01/2020                                     | 2020-03-12 | Laboratory of Infectious Diseases Center of Beijing Ditan Hospital                              | Laboratory of Infectious Diseases Center of Beijing Ditan Hospital                                           | Siyan Yang, Chengjie Jie, Fengting Yu, Yunxia Tang, Liting Yan, Linghang Wang                                                                                                                                                                                                                                                                                                                                                                                                                                                                                                                                                                                                                                                                                                                                                                                                                                                                                                                                                                                                                                                                                                                                                                                                                                                                                                                                                                                                                                                                                                                                                                                                 |
| EPI_ISL_452334 | hCoV-19/Beijing/DT-travelIT05/2020                                     | 2020-03-19 | Laboratory of Infectious Diseases Center of Beijing Ditan Hospital                              | Laboratory of Infectious Diseases Center of Beijing Ditan Hospital                                           | Siyan Yang, Chengjie Jie, Fengting Yu, Yunxia Tang, Liting Yan, Linghang Wang                                                                                                                                                                                                                                                                                                                                                                                                                                                                                                                                                                                                                                                                                                                                                                                                                                                                                                                                                                                                                                                                                                                                                                                                                                                                                                                                                                                                                                                                                                                                                                                                 |
| EPI_ISL_452335 | hCoV-19/Beijing/DT-travelUK02/2020                                     | 2020-03-16 | Laboratory of Infectious Diseases Center of Beijing Ditan Hospital                              | Laboratory of Infectious Diseases Center of Beijing Ditan Hospital                                           | Siyan Yang, Chengjie Jie, Fengting Yu, Yunxia Tang, Liting Yan, Linghang Wang                                                                                                                                                                                                                                                                                                                                                                                                                                                                                                                                                                                                                                                                                                                                                                                                                                                                                                                                                                                                                                                                                                                                                                                                                                                                                                                                                                                                                                                                                                                                                                                                 |
| EPI_ISL_452336 | hCoV-19/Beijing/DT-travelKSA04/2020                                    | 2020-03-20 | Laboratory of Infectious Diseases Center of Beijing Ditan Hospital                              | Laboratory of Infectious Diseases Center of Beijing Ditan Hospital                                           | Siyan Yang, Chengjie Jie, Fengting Yu, Yunxia Tang, Liting Yan, Linghang Wang                                                                                                                                                                                                                                                                                                                                                                                                                                                                                                                                                                                                                                                                                                                                                                                                                                                                                                                                                                                                                                                                                                                                                                                                                                                                                                                                                                                                                                                                                                                                                                                                 |
| EPI_ISL_452337 | hCoV-19/Beijing/DT-travelFR02/2020                                     | 2020-03-24 | Laboratory of Infectious Diseases Center of Beijing Ditan Hospital                              | Laboratory of Infectious Diseases Center of Beijing Ditan Hospital                                           | Siyan Yang, Chengjie Jie, Fengting Yu, Yunxia Tang, Liting Yan, Linghang Wang                                                                                                                                                                                                                                                                                                                                                                                                                                                                                                                                                                                                                                                                                                                                                                                                                                                                                                                                                                                                                                                                                                                                                                                                                                                                                                                                                                                                                                                                                                                                                                                                 |
| EPI_ISL_452338 | hCoV-19/Beijing/DT-travelUSA02/2020                                    | 2020-03-19 | Laboratory of Infectious Diseases Center of Beijing Ditan Hospital                              | Laboratory of Infectious Diseases Center of Beijing Ditan Hospital                                           | Siyan Yang, Chengjie Jie, Fengting Yu, Yunxia Tang, Liting Yan, Linghang Wang                                                                                                                                                                                                                                                                                                                                                                                                                                                                                                                                                                                                                                                                                                                                                                                                                                                                                                                                                                                                                                                                                                                                                                                                                                                                                                                                                                                                                                                                                                                                                                                                 |
| EPI_ISL_452339 | hCoV-19/Beijing/DT-travelUSA04/2020                                    | 2020-03-22 | Laboratory of Infectious Diseases Center of Beijing Ditan Hospital                              | Laboratory of Infectious Diseases Center of Beijing Ditan Hospital                                           | Siyan Yang, Chengjie Jie, Fengting Yu, Yunxia Tang, Liting Yan, Linghang Wang                                                                                                                                                                                                                                                                                                                                                                                                                                                                                                                                                                                                                                                                                                                                                                                                                                                                                                                                                                                                                                                                                                                                                                                                                                                                                                                                                                                                                                                                                                                                                                                                 |
| EPI_ISL_452340 | hCoV-19/Beijing/DT-travelUSA03/2020                                    | 2020-03-19 | Laboratory of Infectious Diseases Center of Beijing Ditan Hospital                              | Laboratory of Infectious Diseases Center of Beijing Ditan Hospital                                           | Siyan Yang, Chengjie Jie, Fengting Yu, Yunxia Tang, Liting Yan, Linghang Wang                                                                                                                                                                                                                                                                                                                                                                                                                                                                                                                                                                                                                                                                                                                                                                                                                                                                                                                                                                                                                                                                                                                                                                                                                                                                                                                                                                                                                                                                                                                                                                                                 |
| EPI_ISL_452341 | hCoV-19/Beijing/DT-travelMX01/2020                                     | 2020-03-22 | Laboratory of Infectious Diseases Center of Beijing Ditan Hospital                              | Laboratory of Infectious Diseases Center of Beijing Ditan Hospital                                           | Siyan Yang, Chengjie Jie, Fengting Yu, Yunxia Tang, Liting Yan, Linghang Wang                                                                                                                                                                                                                                                                                                                                                                                                                                                                                                                                                                                                                                                                                                                                                                                                                                                                                                                                                                                                                                                                                                                                                                                                                                                                                                                                                                                                                                                                                                                                                                                                 |
| EPI_ISL_452342 | hCoV-19/Beijing/DT-travelNO01/2020                                     | 2020-03-12 | Laboratory of Infectious Diseases Center of Beijing Ditan Hospital                              | Laboratory of Infectious Diseases Center of Beijing Ditan Hospital                                           | Siyan Yang, Chengjie Jie, Fengting Yu, Yunxia Tang, Liting Yan, Linghang Wang                                                                                                                                                                                                                                                                                                                                                                                                                                                                                                                                                                                                                                                                                                                                                                                                                                                                                                                                                                                                                                                                                                                                                                                                                                                                                                                                                                                                                                                                                                                                                                                                 |
| EPI_ISL_452343 | hCoV-19/Beijing/DT-travelES01/2020                                     | 2020-03-16 | Laboratory of Infectious Diseases Center of Beijing Ditan Hospital                              | Laboratory of Infectious Diseases Center of Beijing Ditan Hospital                                           | Siyan Yang, Chengjie Jie, Fengting Yu, Yunxia Tang, Liting Yan, Linghang Wang                                                                                                                                                                                                                                                                                                                                                                                                                                                                                                                                                                                                                                                                                                                                                                                                                                                                                                                                                                                                                                                                                                                                                                                                                                                                                                                                                                                                                                                                                                                                                                                                 |
| EPI_ISL_452344 | hCoV-19/Beijing/DT-travelES02/2020                                     | 2020-03-12 | Laboratory of Infectious Diseases Center of Beijing Ditan Hospital                              | Laboratory of Infectious Diseases Center of Beijing Ditan Hospital                                           | Siyan Yang, Chengjie Jie, Fengting Yu, Yunxia Tang, Liting Yan, Linghang Wang                                                                                                                                                                                                                                                                                                                                                                                                                                                                                                                                                                                                                                                                                                                                                                                                                                                                                                                                                                                                                                                                                                                                                                                                                                                                                                                                                                                                                                                                                                                                                                                                 |
| EPI_ISL_452345 | hCoV-19/Beijing/DT-travelES03/2020                                     | 2020-03-07 | Laboratory of Infectious Diseases Center of Beijing Ditan Hospital                              | Laboratory of Infectious Diseases Center of Beijing Ditan Hospital                                           | Siyan Yang, Chengjie Jie, Fengting Yu, Yunxia Tang, Liting Yan, Linghang Wang                                                                                                                                                                                                                                                                                                                                                                                                                                                                                                                                                                                                                                                                                                                                                                                                                                                                                                                                                                                                                                                                                                                                                                                                                                                                                                                                                                                                                                                                                                                                                                                                 |
| EPI_ISL_452346 | hCoV-19/Beijing/DT-travelESA04/2020                                    | 2020-03-19 | Laboratory of Infectious Diseases Center of Beijing Ditan Hospital                              | Laboratory of Infectious Diseases Center of Beijing Ditan Hospital                                           | Siyan Yang, Chengjie Jie, Fengting Yu, Yunxia Tang, Liting Yan, Linghang Wang                                                                                                                                                                                                                                                                                                                                                                                                                                                                                                                                                                                                                                                                                                                                                                                                                                                                                                                                                                                                                                                                                                                                                                                                                                                                                                                                                                                                                                                                                                                                                                                                 |
| EPI_ISL_452347 | hCoV-19/Beijing/DT-travelGR01/2020                                     | 2020-03-15 | Laboratory of Infectious Diseases Center of Beijing Ditan Hospital                              | Laboratory of Infectious Diseases Center of Beijing Ditan Hospital                                           | Siyan Yang, Chengjie Jie, Fengting Yu, Yunxia Tang, Liting Yan, Linghang Wang                                                                                                                                                                                                                                                                                                                                                                                                                                                                                                                                                                                                                                                                                                                                                                                                                                                                                                                                                                                                                                                                                                                                                                                                                                                                                                                                                                                                                                                                                                                                                                                                 |
| EPI_ISL_452348 | hCoV-19/Beijing/DT-travelUK02/2020                                     | 2020-03-18 | Laboratory of Infectious Diseases Center of Beijing Ditan Hospital                              | Laboratory of Infectious Diseases Center of Beijing Ditan Hospital                                           | Siyan Yang, Chengjie Jie, Fengting Yu, Yunxia Tang, Liting Yan, Linghang Wang                                                                                                                                                                                                                                                                                                                                                                                                                                                                                                                                                                                                                                                                                                                                                                                                                                                                                                                                                                                                                                                                                                                                                                                                                                                                                                                                                                                                                                                                                                                                                                                                 |
| EPI_ISL_452349 | hCoV-19/Beijing/DT-travelHUS01/2020                                    | 2020-03-19 | Laboratory of Infectious Diseases Center of Beijing Ditan Hospital                              | Laboratory of Infectious Diseases Center of Beijing Ditan Hospital                                           | Siyan Yang, Chengjie Jie, Fengting Yu, Yunxia Tang, Liting Yan, Linghang Wang                                                                                                                                                                                                                                                                                                                                                                                                                                                                                                                                                                                                                                                                                                                                                                                                                                                                                                                                                                                                                                                                                                                                                                                                                                                                                                                                                                                                                                                                                                                                                                                                 |
| EPI_ISL_452350 | hCoV-19/Beijing/DT-travelHUS03/2020                                    | 2020-03-20 | Laboratory of Infectious Diseases Center of Beijing Ditan Hospital                              | Laboratory of Infectious Diseases Center of Beijing Ditan Hospital                                           | Siyan Yang, Chengjie Jie, Fengting Yu, Yunxia Tang, Liting Yan, Linghang Wang                                                                                                                                                                                                                                                                                                                                                                                                                                                                                                                                                                                                                                                                                                                                                                                                                                                                                                                                                                                                                                                                                                                                                                                                                                                                                                                                                                                                                                                                                                                                                                                                 |
| EPI_ISL_452351 | hCoV-19/Beijing/DT-travelIT04/2020                                     | 2020-03-04 | Laboratory of Infectious Diseases Center of Beijing Ditan Hospital                              | Laboratory of Infectious Diseases Center of Beijing Ditan Hospital                                           | Siyan Yang, Chengjie Jie, Fengting Yu, Yunxia Tang, Liting Yan, Linghang Wang                                                                                                                                                                                                                                                                                                                                                                                                                                                                                                                                                                                                                                                                                                                                                                                                                                                                                                                                                                                                                                                                                                                                                                                                                                                                                                                                                                                                                                                                                                                                                                                                 |
| EPI_ISL_452352 | hCoV-19/Beijing/DT-travelIT01/2020                                     | 2020-03-05 | Laboratory of Infectious Diseases Center of Beijing Ditan Hospital                              | Laboratory of Infectious Diseases Center of Beijing Ditan Hospital                                           | Siyan Yang, Chengjie Jie, Fengting Yu, Yunxia Tang, Liting Yan, Linghang Wang                                                                                                                                                                                                                                                                                                                                                                                                                                                                                                                                                                                                                                                                                                                                                                                                                                                                                                                                                                                                                                                                                                                                                                                                                                                                                                                                                                                                                                                                                                                                                                                                 |

|                |                                      |                                                   |            |                                                                   |                                                                                                                            |                                                                                |
|----------------|--------------------------------------|---------------------------------------------------|------------|-------------------------------------------------------------------|----------------------------------------------------------------------------------------------------------------------------|--------------------------------------------------------------------------------|
| EPI_ESI_45232s | hCoV-19/Beijing/DI-travel/02/2020    | Asia / China / Beijing                            | 2020-03-06 | Laboratory of Infectious Diseases Center of Beijing Dian Hospital | Laboratory of Infectious Diseases Center of Beijing Dian Hospital                                                          | Siyuan Yang, Chengjie Ji, Fengling Yu, Yunxia Tang, Liting Yan, Linghang Wang  |
| EPI_ESI_45233s | hCoV-19/Beijing/DI-travel/02/2020    | Asia / China / Beijing                            | 2020-03-07 | Laboratory of Infectious Diseases Center of Beijing Dian Hospital | Laboratory of Infectious Diseases Center of Beijing Dian Hospital                                                          | Siyuan Yang, Chengjie Ji, Fengling Yu, Yunxia Tang, Liting Yan, Linghang Wang  |
| EPI_ESI_45235s | hCoV-19/Beijing/DI-travel/UK/2020    | Asia / China / Beijing                            | 2020-03-22 | Laboratory of Infectious Diseases Center of Beijing Dian Hospital | Laboratory of Infectious Diseases Center of Beijing Dian Hospital                                                          | Siyuan Yang, Chengjie Ji, Fengling Yu, Yunxia Tang, Liting Yan, Linghang Wang  |
| EPI_ESI_45236s | hCoV-19/Beijing/DI-travel/UK/03/2020 | Asia / China / Beijing                            | 2020-03-21 | Laboratory of Infectious Diseases Center of Beijing Dian Hospital | Laboratory of Infectious Diseases Center of Beijing Dian Hospital                                                          | Siyuan Yang, Chengjie Ji, Fengling Yu, Yunxia Tang, Liting Yan, Linghang Wang  |
| EPI_ESI_45237s | hCoV-19/Beijing/DI-travel/02/2020    | Asia / China / Beijing                            | 2020-02-04 | Laboratory of Infectious Diseases Center of Beijing Dian Hospital | Laboratory of Infectious Diseases Center of Beijing Dian Hospital                                                          | Siyuan Yang, Chengjie Ji, Fengling Yu, Yunxia Tang, Liting Yan, Linghang Wang  |
| EPI_ESI_45238s | hCoV-19/Beijing/DI-BJ-01/2020        | Asia / China / Beijing                            | 2020-02-11 | Laboratory of Infectious Diseases Center of Beijing Dian Hospital | Laboratory of Infectious Diseases Center of Beijing Dian Hospital                                                          | Siyuan Yang, Chengjie Ji, Fengling Yu, Yunxia Tang, Liting Yan, Linghang Wang  |
| EPI_ESI_45239s | hCoV-19/Beijing/DI-BJ-02/2020        | Asia / China / Beijing                            | 2020-02-08 | Laboratory of Infectious Diseases Center of Beijing Dian Hospital | Laboratory of Infectious Diseases Center of Beijing Dian Hospital                                                          | Siyuan Yang, Chengjie Ji, Fengling Yu, Yunxia Tang, Liting Yan, Linghang Wang  |
| EPI_ESI_45230s | hCoV-19/Beijing/DI-WH01/2020         | Asia / China / Beijing                            | 2020-02-01 | Laboratory of Infectious Diseases Center of Beijing Dian Hospital | Laboratory of Infectious Diseases Center of Beijing Dian Hospital                                                          | Siyuan Yang, Chengjie Ji, Fengling Yu, Yunxia Tang, Liting Yan, Linghang Wang  |
| EPI_ESI_45231s | hCoV-19/Beijing/DI-BJ-03/2020        | Asia / China / Beijing                            | 2020-02-11 | Laboratory of Infectious Diseases Center of Beijing Dian Hospital | Laboratory of Infectious Diseases Center of Beijing Dian Hospital                                                          | Siyuan Yang, Chengjie Ji, Fengling Yu, Yunxia Tang, Liting Yan, Linghang Wang  |
| EPI_ESI_45232s | hCoV-19/Beijing/DI-WH03/2020         | Asia / China / Beijing                            | 2020-02-01 | Laboratory of Infectious Diseases Center of Beijing Dian Hospital | Laboratory of Infectious Diseases Center of Beijing Dian Hospital                                                          | Siyuan Yang, Chengjie Ji, Fengling Yu, Yunxia Tang, Liting Yan, Linghang Wang  |
| EPI_ESI_45233s | hCoV-19/Beijing/DI-WH04/2020         | Asia / China / Beijing                            | 2020-01-31 | Laboratory of Infectious Diseases Center of Beijing Dian Hospital | Laboratory of Infectious Diseases Center of Beijing Dian Hospital                                                          | Siyuan Yang, Chengjie Ji, Fengling Yu, Yunxia Tang, Liting Yan, Linghang Wang  |
| EPI_ESI_45234s | hCoV-19/Beijing/DI-BJ-04/2020        | Asia / China / Beijing                            | 2020-02-05 | Laboratory of Infectious Diseases Center of Beijing Dian Hospital | Laboratory of Infectious Diseases Center of Beijing Dian Hospital                                                          | Siyuan Yang, Chengjie Ji, Fengling Yu, Yunxia Tang, Liting Yan, Linghang Wang  |
| EPI_ESI_45247s | hCoV-19/Spain/COV01/429/2020         | Europe / Spain / Navarra / Tafalla                | 2020-03-23 | SecCOVID-SPAN consortium/IBV(CSIC)                                | SecCOVID-SPAN consortium/IBV(CSIC)                                                                                         | Miriam Fernandez-Alonso, Jose Luis del Pozo and SecCOVID-SPAN consortium       |
| EPI_ESI_45247s | hCoV-19/Spain/COV01/429/2020         | Europe / Spain / Baque Country / Bern 2020-03-23  | 2020-03-23 | SecCOVID-SPAN consortium/IBV(CSIC)                                | SecCOVID-SPAN consortium/IBV(CSIC)                                                                                         | Miriam Fernandez-Alonso, Jose Luis del Pozo and SecCOVID-SPAN consortium       |
| EPI_ESI_45248s | hCoV-19/Spain/COV01/421/2020         | Europe / Spain / Baque Country / Portu 2020-03-22 | 2020-03-22 | SecCOVID-SPAN consortium/IBV(CSIC)                                | SecCOVID-SPAN consortium/IBV(CSIC)                                                                                         | Miriam Fernandez-Alonso, Jose Luis del Pozo and SecCOVID-SPAN consortium       |
| EPI_ESI_45248s | hCoV-19/Spain/COV01/420/2020         | Europe / Spain / Navarra / Pamplona               | 2020-03-21 | SecCOVID-SPAN consortium/IBV(CSIC)                                | SecCOVID-SPAN consortium/IBV(CSIC)                                                                                         | Miriam Fernandez-Alonso, Jose Luis del Pozo and SecCOVID-SPAN consortium       |
| EPI_ESI_45248s | hCoV-19/Spain/COV01/417/2020         | Europe / Spain / Navarra / Pamplona               | 2020-03-22 | SecCOVID-SPAN consortium/IBV(CSIC)                                | SecCOVID-SPAN consortium/IBV(CSIC)                                                                                         | Miriam Fernandez-Alonso, Jose Luis del Pozo and SecCOVID-SPAN consortium       |
| EPI_ESI_45248s | hCoV-19/Spain/COV01/414/2020         | Europe / Spain / Navarra / Echavarri              | 2020-03-21 | SecCOVID-SPAN consortium/IBV(CSIC)                                | SecCOVID-SPAN consortium/IBV(CSIC)                                                                                         | Miriam Fernandez-Alonso, Jose Luis del Pozo and SecCOVID-SPAN consortium       |
| EPI_ESI_45248s | hCoV-19/Spain/COV01/413/2020         | Europe / Spain / Navarra / Pamplona               | 2020-03-20 | SecCOVID-SPAN consortium/IBV(CSIC)                                | SecCOVID-SPAN consortium/IBV(CSIC)                                                                                         | Miriam Fernandez-Alonso, Jose Luis del Pozo and SecCOVID-SPAN consortium       |
| EPI_ESI_45248s | hCoV-19/Spain/COV01/412/2020         | Europe / Spain / Navarra / Pamplona               | 2020-03-20 | SecCOVID-SPAN consortium/IBV(CSIC)                                | SecCOVID-SPAN consortium/IBV(CSIC)                                                                                         | Miriam Fernandez-Alonso, Jose Luis del Pozo and SecCOVID-SPAN consortium       |
| EPI_ESI_45248s | hCoV-19/Spain/COV01/409/2020         | Europe / Spain / Navarra / Pamplona               | 2020-03-20 | SecCOVID-SPAN consortium/IBV(CSIC)                                | SecCOVID-SPAN consortium/IBV(CSIC)                                                                                         | Miriam Fernandez-Alonso, Jose Luis del Pozo and SecCOVID-SPAN consortium       |
| EPI_ESI_45248s | hCoV-19/Spain/COV01/405/2020         | Europe / Spain / Navarra / Pamplona               | 2020-03-20 | SecCOVID-SPAN consortium/IBV(CSIC)                                | SecCOVID-SPAN consortium/IBV(CSIC)                                                                                         | Miriam Fernandez-Alonso, Jose Luis del Pozo and SecCOVID-SPAN consortium       |
| EPI_ESI_45248s | hCoV-19/Spain/COV01/403/2020         | Europe / Spain / Navarra / Tafalla                | 2020-03-19 | SecCOVID-SPAN consortium/IBV(CSIC)                                | SecCOVID-SPAN consortium/IBV(CSIC)                                                                                         | Miriam Fernandez-Alonso, Jose Luis del Pozo and SecCOVID-SPAN consortium       |
| EPI_ESI_455347 | hCoV-19/Spain/Mella2024/9/2020       | Europe / Spain / Mella                            | 2020-03-14 | Hospital Comarcal de Mella                                        | Instituto de Salud Carlos III                                                                                              | Miriam Fernandez-Alonso, Jose Luis del Pozo and SecCOVID-SPAN consortium       |
| EPI_ESI_455348 | hCoV-19/Spain/Mella2025/2/2020       | Europe / Spain / Mella                            | 2020-03-14 | Hospital Comarcal de Mella                                        | Instituto de Salud Carlos III                                                                                              | Miriam Fernandez-Alonso, Jose Luis del Pozo and SecCOVID-SPAN consortium       |
| EPI_ESI_455349 | hCoV-19/Spain/Mella2025/4/2020       | Europe / Spain / Mella                            | 2020-03-14 | Hospital Comarcal de Mella                                        | Instituto de Salud Carlos III                                                                                              | Miriam Fernandez-Alonso, Jose Luis del Pozo and SecCOVID-SPAN consortium       |
| EPI_ESI_455350 | hCoV-19/Spain/Palacio2013/85/2020    | Europe / Spain / Baque Country                    | 2020-02-29 | Hospital Txagorritu                                               | Instituto de Salud Carlos III                                                                                              | Miriam Fernandez-Alonso, Jose Luis del Pozo and SecCOVID-SPAN consortium       |
| EPI_ESI_455351 | hCoV-19/Spain/Palacio2013/88/2020    | Europe / Spain / Baque Country                    | 2020-02-29 | Hospital Txagorritu                                               | Instituto de Salud Carlos III                                                                                              | Miriam Fernandez-Alonso, Jose Luis del Pozo and SecCOVID-SPAN consortium       |
| EPI_ESI_455352 | hCoV-19/Spain/Palacio2014/10/2020    | Europe / Spain / Baque Country                    | 2020-03-04 | Hospital de Cruces                                                | Instituto de Salud Carlos III                                                                                              | Miriam Fernandez-Alonso, Jose Luis del Pozo and SecCOVID-SPAN consortium       |
| EPI_ESI_455353 | hCoV-19/Spain/Palacio2014/92/2020    | Europe / Spain / Baque Country                    | 2020-03-04 | Hospital de Cruces                                                | Instituto de Salud Carlos III                                                                                              | Miriam Fernandez-Alonso, Jose Luis del Pozo and SecCOVID-SPAN consortium       |
| EPI_ESI_455354 | hCoV-19/Spain/Palacio2015/92/2020    | Europe / Spain / Baque Country                    | 2020-03-05 | Hospital de Cruces                                                | Instituto de Salud Carlos III                                                                                              | Miriam Fernandez-Alonso, Jose Luis del Pozo and SecCOVID-SPAN consortium       |
| EPI_ESI_455352 | hCoV-19/Nigeria/KW017-CV/24/2020     | Africa / Nigeria / Kwara State                    | 2020-04-10 | Nigeria Centre for Disease Control (NCDC)                         | African Centre of Excellence for Genomics of Infectious Diseases (ACEGID), Redeemer's University, Ede, Osun State, Nigeria | Olunloyi P.E., Agbajide F.V., Kayode A., Oguzie J., Olawoye I., Uwanibe J., Ol |

|                |                                      |                                  |            |                                                                                                                  |                                        |                                                                                                                                |
|----------------|--------------------------------------|----------------------------------|------------|------------------------------------------------------------------------------------------------------------------|----------------------------------------|--------------------------------------------------------------------------------------------------------------------------------|
| EPI_ISL_454572 | hCoV-19/Romania/284168/2020          | Europe / Romania / Buzau         | 2020-05-13 | Laboratory for Respiratory Viruses, Cantacuzino National Military-Medical Institute for Research and Development | Cantacuzino Institute                  | M.Lazar, L.Ustila, A.Creta, Tim Durfee                                                                                         |
| EPI_ISL_454573 | hCoV-19/Romania/284566/2020          | Europe / Romania / Arges         | 2020-05-14 | Laboratory for Respiratory Viruses, Cantacuzino National Military-Medical Institute for Research and Development | Cantacuzino Institute                  | M.Lazar, L.Ustila, A.Creta, Tim Durfee                                                                                         |
| EPI_ISL_454574 | hCoV-19/Romania/284783/2020          | Europe / Romania / Arges         | 2020-05-14 | Laboratory for Respiratory Viruses, Cantacuzino National Military-Medical Institute for Research and Development | Cantacuzino Institute                  | M.Lazar, L.Ustila, A.Creta, Tim Durfee                                                                                         |
| EPI_ISL_454575 | hCoV-19/Romania/284782/2020          | Europe / Romania / Arges         | 2020-05-14 | Laboratory for Respiratory Viruses, Cantacuzino National Military-Medical Institute for Research and Development | Cantacuzino Institute                  | M.Lazar, L.Ustila, A.Creta, Tim Durfee                                                                                         |
| EPI_ISL_454576 | hCoV-19/Romania/285388/2020          | Europe / Romania / Bucuresti     | 2020-05-17 | Laboratory for Respiratory Viruses, Cantacuzino National Military-Medical Institute for Research and Development | Cantacuzino Institute                  | M.Lazar, L.Ustila, A.Creta, Tim Durfee                                                                                         |
| EPI_ISL_454577 | hCoV-19/Romania/284712/2020          | Europe / Romania / Bucuresti     | 2020-05-13 | Laboratory for Respiratory Viruses, Cantacuzino National Military-Medical Institute for Research and Development | Cantacuzino Institute                  | M.Lazar, L.Ustila, A.Creta, Tim Durfee                                                                                         |
| EPI_ISL_454579 | hCoV-19/Romania/284668/2020          | Europe / Romania / Bucuresti     | 2020-05-14 | Laboratory for Respiratory Viruses, Cantacuzino National Military-Medical Institute for Research and Development | Cantacuzino Institute                  | M.Lazar, L.Ustila, A.Creta, Tim Durfee                                                                                         |
| EPI_ISL_455566 | hCoV-19/Croatia/7-17-Shew/2020       | Europe / Croatia / Istria        | 2020-03-30 | Institute for Public Health                                                                                      | Laboratory for advanced genomics       | Filip Rokic, Lovro Trgovce-Gref, Neven Subic, Tomislav Rukavina, Igor Jurak, Oliver Vugrek                                     |
| EPI_ISL_455567 | hCoV-19/Croatia/7-18-Shew/2020       | Europe / Croatia / Istria        | 2020-03-29 | Institute for Public Health                                                                                      | Laboratory for advanced genomics       | Filip Rokic, Lovro Trgovce-Gref, Neven Subic, Tomislav Rukavina, Igor Jurak, Oliver Vugrek                                     |
| EPI_ISL_457824 | hCoV-19/Turkey/Istanbul-BemCoV1/2020 | Europe / Turkey / Istanbul       | 2020-03-24 | Bogazici University, Dept Microbiology, Medical School, Fatih, Istanbul, Turkey                                  | Laboratory for advanced genomics       | Alihan C. Duzman, Merve Kalkan, Nesibe Cetin, Elif Karaslan, Bilge Sumut, Filiz Guney                                          |
| EPI_ISL_459866 | hCoV-19/Canada/CN_OGLO-01/2020       | North America / Canada / Ontario | 2020-03-18 | Kingston Health Sciences Center                                                                                  | Queen's Genomics Lab at Otagawa (G-LO) | Sjardrs CP, Rustum N, Huang D, Perez-Paragerson S, Hudson ML, Wong H, Guan H, Ayub M, Soares CN, Colautti R, Evans GA, Sheth P |
| EPI_ISL_459867 | hCoV-19/Canada/CN_OGLO-02/2020       | North America / Canada / Ontario | 2020-03-22 | Kingston Health Sciences Center                                                                                  | Queen's Genomics Lab at Otagawa (G-LO) | Sjardrs CP, Rustum N, Huang D, Perez-Paragerson S, Hudson ML, Wong H, Guan H, Ayub M, Soares CN, Colautti R, Evans GA, Sheth P |
| EPI_ISL_459868 | hCoV-19/Canada/CN_OGLO-04/2020       | North America / Canada / Ontario | 2020-03-24 | Kingston Health Sciences Center                                                                                  | Queen's Genomics Lab at Otagawa (G-LO) | Sjardrs CP, Rustum N, Huang D, Perez-Paragerson S, Hudson ML, Wong H, Guan H, Ayub M, Soares CN, Colautti R, Evans GA, Sheth P |
| EPI_ISL_459869 | hCoV-19/Canada/CN_OGLO-010/2020      | North America / Canada / Ontario | 2020-03-26 | Kingston Health Sciences Center                                                                                  | Queen's Genomics Lab at Otagawa (G-LO) | Sjardrs CP, Rustum N, Huang D, Perez-Paragerson S, Hudson ML, Wong H, Guan H, Ayub M, Soares CN, Colautti R, Evans GA, Sheth P |
| EPI_ISL_459871 | hCoV-19/Canada/CN_OGLO-011/2020      | North America / Canada / Ontario | 2020-03-26 | Kingston Health Sciences Center                                                                                  | Queen's Genomics Lab at Otagawa (G-LO) | Sjardrs CP, Rustum N, Huang D, Perez-Paragerson S, Hudson ML, Wong H, Guan H, Ayub M, Soares CN, Colautti R, Evans GA, Sheth P |
| EPI_ISL_459872 | hCoV-19/Canada/CN_OGLO-012/2020      | North America / Canada / Ontario | 2020-03-26 | Kingston Health Sciences Center                                                                                  | Queen's Genomics Lab at Otagawa (G-LO) | Sjardrs CP, Rustum N, Huang D, Perez-Paragerson S, Hudson ML, Wong H, Guan H, Ayub M, Soares CN, Colautti R, Evans GA, Sheth P |
| EPI_ISL_459873 | hCoV-19/Canada/CN_OGLO-016/2020      | North America / Canada / Ontario | 2020-03-26 | Kingston Health Sciences Center                                                                                  | Queen's Genomics Lab at Otagawa (G-LO) | Sjardrs CP, Rustum N, Huang D, Perez-Paragerson S, Hudson ML, Wong H, Guan H, Ayub M, Soares CN, Colautti R, Evans GA, Sheth P |
| EPI_ISL_459874 | hCoV-19/Canada/CN_OGLO-017/2020      | North America / Canada / Ontario | 2020-03-27 | Kingston Health Sciences Center                                                                                  | Queen's Genomics Lab at Otagawa (G-LO) | Sjardrs CP, Rustum N, Huang D, Perez-Paragerson S, Hudson ML, Wong H, Guan H, Ayub M, Soares CN, Colautti R, Evans GA, Sheth P |
| EPI_ISL_459875 | hCoV-19/Canada/CN_OGLO-018/2020      | North America / Canada / Ontario | 2020-03-27 | Kingston Health Sciences Center                                                                                  | Queen's Genomics Lab at Otagawa (G-LO) | Sjardrs CP, Rustum N, Huang D, Perez-Paragerson S, Hudson ML, Wong H, Guan H, Ayub M, Soares CN, Colautti R, Evans GA, Sheth P |
| EPI_ISL_459878 | hCoV-19/Canada/CN_OGLO-021/2020      | North America / Canada / Ontario | 2020-03-27 | Kingston Health Sciences Center                                                                                  | Queen's Genomics Lab at Otagawa (G-LO) | Sjardrs CP, Rustum N, Huang D, Perez-Paragerson S, Hudson ML, Wong H, Guan H, Ayub M, Soares CN, Colautti R, Evans GA, Sheth P |
| EPI_ISL_459879 | hCoV-19/Canada/CN_OGLO-023/2020      | North America / Canada / Ontario | 2020-03-28 | Kingston Health Sciences Center                                                                                  | Queen's Genomics Lab at Otagawa (G-LO) | Sjardrs CP, Rustum N, Huang D, Perez-Paragerson S, Hudson ML, Wong H, Guan H, Ayub M, Soares CN, Colautti R, Evans GA, Sheth P |
| EPI_ISL_459880 | hCoV-19/Canada/CN_OGLO-024/2020      | North America / Canada / Ontario | 2020-03-28 | Kingston Health Sciences Center                                                                                  | Queen's Genomics Lab at Otagawa (G-LO) | Sjardrs CP, Rustum N, Huang D, Perez-Paragerson S, Hudson ML, Wong H, Guan H, Ayub M, Soares CN, Colautti R, Evans GA, Sheth P |
| EPI_ISL_459881 | hCoV-19/Canada/CN_OGLO-025/2020      | North America / Canada / Ontario | 2020-03-28 | Kingston Health Sciences Center                                                                                  | Queen's Genomics Lab at Otagawa (G-LO) | Sjardrs CP, Rustum N, Huang D, Perez-Paragerson S, Hudson ML, Wong H, Guan H, Ayub M, Soares CN, Colautti R, Evans GA, Sheth P |
| EPI_ISL_459882 | hCoV-19/Canada/CN_OGLO-026/2020      | North America / Canada / Ontario | 2020-03-28 | Kingston Health Sciences Center                                                                                  | Queen's Genomics Lab at Otagawa (G-LO) | Sjardrs CP, Rustum N, Huang D, Perez-Paragerson S, Hudson ML, Wong H, Guan H, Ayub M, Soares CN, Colautti R, Evans GA, Sheth P |
| EPI_ISL_459883 | hCoV-19/Canada/CN_OGLO-029/2020      | North America / Canada / Ontario | 2020-03-28 | Kingston Health Sciences Center                                                                                  | Queen's Genomics Lab at Otagawa (G-LO) | Sjardrs CP, Rustum N, Huang D, Perez-Paragerson S, Hudson ML, Wong H, Guan H, Ayub M, Soares CN, Colautti R, Evans GA, Sheth P |
| EPI_ISL_459884 | hCoV-19/Canada/CN_OGLO-030/2020      | North America / Canada / Ontario | 2020-03-28 | Kingston Health Sciences Center                                                                                  | Queen's Genomics Lab at Otagawa (G-LO) | Sjardrs CP, Rustum N, Huang D, Perez-Paragerson S, Hudson ML, Wong H, Guan H, Ayub M, Soares CN, Colautti R, Evans GA, Sheth P |
| EPI_ISL_459885 | hCoV-19/Canada/CN_OGLO-034/2020      | North America / Canada / Ontario | 2020-03-29 | Kingston Health Sciences Center                                                                                  | Queen's Genomics Lab at Otagawa (G-LO) | Sjardrs CP, Rustum N, Huang D, Perez-Paragerson S, Hudson ML, Wong H, Guan H, Ayub M, Soares CN, Colautti R, Evans GA, Sheth P |
| EPI_ISL_459886 | hCoV-19/Canada/CN_OGLO-035/2020      | North America / Canada / Ontario | 2020-03-30 | Kingston Health Sciences Center                                                                                  | Queen's Genomics Lab at Otagawa (G-LO) | Sjardrs CP, Rustum N, Huang D, Perez-Paragerson S, Hudson ML, Wong H, Guan H, Ayub M, Soares CN, Colautti R, Evans GA, Sheth P |
| EPI_ISL_459887 | hCoV-19/Canada/CN_OGLO-036/2020</    |                                  |            |                                                                                                                  |                                        |                                                                                                                                |

|                |                                             |                                                      |            |                                                                                                                                             |                                                                                                                          |                                                                                                                                                                                                                                                                                                   |
|----------------|---------------------------------------------|------------------------------------------------------|------------|---------------------------------------------------------------------------------------------------------------------------------------------|--------------------------------------------------------------------------------------------------------------------------|---------------------------------------------------------------------------------------------------------------------------------------------------------------------------------------------------------------------------------------------------------------------------------------------------|
| EPI_ISL_460084 | hCoV-19Italy/BS-12256-29Feb/2020            | Europe / Italy / Lombardia                           | 2020-02-29 | Molecular Virology Unit, Fondazione IRCCS Policlinico San Matteo                                                                            | Laboratory of Virology, IMI Lazzaro Spallanzani IRCCS                                                                    | Fausto Baldanti, Antonio Piralla, Martina Rucca, Barbara Bartolini, Maria R. Capobianchi, Cesare E.M. Gruber, Antonio Di Caro, Cesare E.M. Gruber, Maria R. Capobianchi, Barbara Bartolini, Fausto Baldanti, Martina Rucca, Antonio Piralla, Antonio Di Caro                                      |
| EPI_ISL_460085 | hCoV-19Italy/CR-13221-1Mar/2020             | Europe / Italy / Lombardia                           | 2020-03-01 | Molecular Virology Unit, Fondazione IRCCS Policlinico San Matteo                                                                            | Laboratory of Virology, IMI Lazzaro Spallanzani IRCCS                                                                    | Maria R. Capobianchi, Fausto Baldanti, Antonio Piralla, Antonio Di Caro, Barbara Bartolini, Cesare E.M. Gruber, Martina Rucca                                                                                                                                                                     |
| EPI_ISL_460086 | hCoV-19Italy/CR-9206-28Feb/2020             | Europe / Italy / Lombardia                           | 2020-02-26 | Molecular Virology Unit, Fondazione IRCCS Policlinico San Matteo                                                                            | Laboratory of Virology, IMI Lazzaro Spallanzani IRCCS                                                                    | Maria R. Capobianchi, Fausto Baldanti, Antonio Piralla, Antonio Di Caro, Barbara Bartolini, Cesare E.M. Gruber, Martina Rucca                                                                                                                                                                     |
| EPI_ISL_460087 | hCoV-19Italy/CR-9214-28Feb/2020             | Europe / Italy / Lombardia                           | 2020-02-26 | Molecular Virology Unit, Fondazione IRCCS Policlinico San Matteo                                                                            | Laboratory of Virology, IMI Lazzaro Spallanzani IRCCS                                                                    | Maria R. Capobianchi, Fausto Baldanti, Antonio Piralla, Antonio Di Caro, Barbara Bartolini, Cesare E.M. Gruber, Martina Rucca                                                                                                                                                                     |
| EPI_ISL_460089 | hCoV-19Italy/CR-9491-28Feb/2020             | Europe / Italy / Lombardia                           | 2020-02-26 | Molecular Virology Unit, Fondazione IRCCS Policlinico San Matteo                                                                            | Laboratory of Virology, IMI Lazzaro Spallanzani IRCCS                                                                    | Maria R. Capobianchi, Fausto Baldanti, Antonio Piralla, Antonio Di Caro, Barbara Bartolini, Cesare E.M. Gruber, Martina Rucca                                                                                                                                                                     |
| EPI_ISL_460091 | hCoV-19Italy/MI-5925-22Feb/2020             | Europe / Italy / Lombardia                           | 2020-02-22 | Molecular Virology Unit, Fondazione IRCCS Policlinico San Matteo                                                                            | Laboratory of Virology, IMI Lazzaro Spallanzani IRCCS                                                                    | Maria R. Capobianchi, Fausto Baldanti, Antonio Piralla, Antonio Di Caro, Barbara Bartolini, Cesare E.M. Gruber, Martina Rucca                                                                                                                                                                     |
| EPI_ISL_460092 | hCoV-19Italy/PV-11951-28Feb/2020            | Europe / Italy / Lombardia                           | 2020-02-28 | Molecular Virology Unit, Fondazione IRCCS Policlinico San Matteo                                                                            | Laboratory of Virology, IMI Lazzaro Spallanzani IRCCS                                                                    | Maria R. Capobianchi, Fausto Baldanti, Antonio Piralla, Antonio Di Caro, Barbara Bartolini, Cesare E.M. Gruber, Martina Rucca                                                                                                                                                                     |
| EPI_ISL_460093 | hCoV-19Italy/PV-12578-29Feb/2020            | Europe / Italy / Lombardia                           | 2020-02-29 | Molecular Virology Unit, Fondazione IRCCS Policlinico San Matteo                                                                            | Laboratory of Virology, IMI Lazzaro Spallanzani IRCCS                                                                    | Maria R. Capobianchi, Fausto Baldanti, Antonio Piralla, Antonio Di Caro, Barbara Bartolini, Cesare E.M. Gruber, Martina Rucca                                                                                                                                                                     |
| EPI_ISL_460094 | hCoV-19Italy/PV-8058-29Feb/2020             | Europe / Italy / Lombardia                           | 2020-02-25 | Molecular Virology Unit, Fondazione IRCCS Policlinico San Matteo                                                                            | Laboratory of Virology, IMI Lazzaro Spallanzani IRCCS                                                                    | Maria R. Capobianchi, Fausto Baldanti, Antonio Piralla, Antonio Di Caro, Barbara Bartolini, Cesare E.M. Gruber, Martina Rucca                                                                                                                                                                     |
| EPI_ISL_463007 | hCoV-19Taiwan/NTU29/2020                    | Asia / Taiwan / Taipei                               | 2020-04-12 | Department of Laboratory Medicine, National Taiwan University Hospital                                                                      | Microbial Genomics Core Lab, National Taiwan University Center of Genomic and Precision Medicine                         | Shou-Huei Yeh, You-Yu Lin, Yu-Yan Lu, Chiao-Ling Li, Shan-Chen Chang, Pei-Jer Chen, Su-Yuan Chang                                                                                                                                                                                                 |
| EPI_ISL_463008 | hCoV-19Germany/Auenstern_71113201/2020      | Europe / Germany / North Rhine Westphalia            | 2020-03-11 | Inst. of Molecular Virology                                                                                                                 | Inst. Hygiene                                                                                                            | Angélique Mezzadama, Linda Bruch, Stephan Ludwig, Joachim Kühn, Alexander Melchior                                                                                                                                                                                                                |
| EPI_ISL_463093 | hCoV-19Bosnia and Herzegovina/03_Tuzla/2020 | Europe / Bosnia and Herzegovina / Tuzla              | 2020-02-25 | University Clinical Center Tuzla                                                                                                            | Inst. Infectious Diseases                                                                                                | Korijbdić R, Salihović L, Golebić T, Pećar D, Tihel N, Marjanović D, Hukić M, Paša Resende, Luciana Appolinario, Fernando Motta, Anna Carolina Paixão, Ana Carolina Mendonça, Aline Mattos, Milene Miranda, Cristiana Garcia, Bráulio Caselaro, Maria Oguzewska, Jonathan López, Marilda Siqueira |
| EPI_ISL_467352 | hCoV-19Brazil/RJ-2422/2020                  | South America / Brazil / Rio de Janeiro / 2020-04-20 | 2020-04-20 | Laboratory of Respiratory Viruses and Measles, Oswaldo Cruz Institute, FIOCRUZ                                                              | Laboratory of Respiratory Viruses and Measles, Oswaldo Cruz Institute, FIOCRUZ                                           | Paša Resende, Luciana Appolinario, Fernando Motta, Anna Carolina Paixão, Ana Carolina Mendonça, Aline Mattos, Milene Miranda, Cristiana Garcia, Bráulio Caselaro, Maria Oguzewska, Jonathan López, Marilda Siqueira                                                                               |
| EPI_ISL_467353 | hCoV-19Brazil/RJ-2669/2020                  | South America / Brazil / Rio de Janeiro / 2020-04-24 | 2020-04-24 | Laboratory of Respiratory Viruses and Measles, Oswaldo Cruz Institute, FIOCRUZ                                                              | Laboratory of Respiratory Viruses and Measles, Oswaldo Cruz Institute, FIOCRUZ                                           | Paša Resende, Luciana Appolinario, Fernando Motta, Anna Carolina Paixão, Ana Carolina Mendonça, Aline Mattos, Milene Miranda, Cristiana Garcia, Bráulio Caselaro, Maria Oguzewska, Jonathan López, Marilda Siqueira                                                                               |
| EPI_ISL_467367 | hCoV-19Brazil/RJ-2622/2020                  | South America / Brazil / Rio de Janeiro / 2020-04-27 | 2020-04-27 | Laboratory of Respiratory Viruses and Measles, Oswaldo Cruz Institute, FIOCRUZ                                                              | Laboratory of Respiratory Viruses and Measles, Oswaldo Cruz Institute, FIOCRUZ                                           | Paša Resende, Luciana Appolinario, Fernando Motta, Anna Carolina Paixão, Ana Carolina Mendonça, Aline Mattos, Milene Miranda, Cristiana Garcia, Bráulio Caselaro, Maria Oguzewska, Jonathan López, Marilda Siqueira                                                                               |
| EPI_ISL_467369 | hCoV-19Brazil/RJ-2844/2020                  | South America / Brazil / Rio de Janeiro / 2020-04-28 | 2020-04-28 | Laboratory of Respiratory Viruses and Measles, Oswaldo Cruz Institute, FIOCRUZ                                                              | Laboratory of Respiratory Viruses and Measles, Oswaldo Cruz Institute, FIOCRUZ                                           | Paša Resende, Luciana Appolinario, Fernando Motta, Anna Carolina Paixão, Ana Carolina Mendonça, Aline Mattos, Milene Miranda, Cristiana Garcia, Bráulio Caselaro, Maria Oguzewska, Jonathan López, Marilda Siqueira                                                                               |
| EPI_ISL_467374 | hCoV-19Indonesia/SMR-EJK05/2020             | Asia / Indonesia / East Kalimantan / Sam2020-03-18   | 2020-03-18 | Dinkes Samarinda                                                                                                                            | Eijkman Institute for Molecular Biology, Ministry of Research and Technology/National Agency for Research and Innovation | Edison Johar, Filisalla A Yuthapatt, Hidayat Trianasanto, David H Muljono, Safarina G Malik, Khin Saw Myint, Ann Soebandono                                                                                                                                                                       |
| EPI_ISL_467375 | hCoV-19Indonesia/MND-EJK06/2020             | Asia / Indonesia / North Sulawesi / Mana2020-03-23   | 2020-03-23 | RSUP Prof. Dr. R. Kandou Manado                                                                                                             | Eijkman Institute for Molecular Biology, Ministry of Research and Technology/National Agency for Research and Innovation | Edison Johar, Filisalla A Yuthapatt, Hidayat Trianasanto, David H Muljono, Safarina G Malik, Khin Saw Myint, Ann Soebandono                                                                                                                                                                       |
| EPI_ISL_467376 | hCoV-19Indonesia/JKT-EJK07/2020             | Asia / Indonesia / Jakarta                           | 2020-03-24 | RSUP Fatmawati                                                                                                                              | Eijkman Institute for Molecular Biology, Ministry of Research and Technology/National Agency for Research and Innovation | Edison Johar, Filisalla A Yuthapatt, Hidayat Trianasanto, David H Muljono, Safarina G Malik, Khin Saw Myint, Ann Soebandono                                                                                                                                                                       |
| EPI_ISL_468765 | hCoV-19Spain/Zaragoza2486/2020              | Europe / Spain / Aragon / Zaragoza                   | 2020-03-17 | Servicio de Microbiología, Hospital Miguel Servet, Zaragoza                                                                                 | SecCOVID-SPAIN consortium/IBV(CSIC)                                                                                      | Antonio Rezusta López, Alexander Tishchenko Bar, Ana Milagro, Yolanda Gracia Grataloup, Neves Martínez Camejo and SecCOVID-SPAIN consortium                                                                                                                                                       |
| EPI_ISL_468766 | hCoV-19Spain/Zaragoza2488/2020              | Europe / Spain / Aragon / Zaragoza                   | 2020-03-17 | Servicio de Microbiología, Hospital Miguel Servet, Zaragoza                                                                                 | SecCOVID-SPAIN consortium/IBV(CSIC)                                                                                      | Antonio Rezusta López, Alexander Tishchenko Bar, Ana Milagro, Yolanda Gracia Grataloup, Neves Martínez Camejo and SecCOVID-SPAIN consortium                                                                                                                                                       |
| EPI_ISL_468767 | hCoV-19Spain/Zaragoza2404/2020              | Europe / Spain / Aragon / Teruel                     | 2020-03-24 | Servicio de Microbiología, Hospital Miguel Servet, Zaragoza                                                                                 | SecCOVID-SPAIN consortium/IBV(CSIC)                                                                                      | Antonio Rezusta López, Alexander Tishchenko Bar, Ana Milagro, Yolanda Gracia Grataloup, Neves Martínez Camejo and SecCOVID-SPAIN consortium                                                                                                                                                       |
| EPI_ISL_468768 | hCoV-19Spain/Zaragoza2416/2020              | Europe / Spain / Aragon / Zaragoza                   | 2020-03-21 | Servicio de Microbiología, Hospital Miguel Servet, Zaragoza                                                                                 | SecCOVID-SPAIN consortium/IBV(CSIC)                                                                                      | Antonio Rezusta López, Alexander Tishchenko Bar, Ana Milagro, Yolanda Gracia Grataloup, Neves Martínez Camejo and SecCOVID-SPAIN consortium                                                                                                                                                       |
| EPI_ISL_468771 | hCoV-19Spain/Zaragoza2487/2020              | Europe / Spain / Aragon / Zaragoza                   | 2020-03-24 | Servicio de Microbiología, Hospital Miguel Servet, Zaragoza                                                                                 | SecCOVID-SPAIN consortium/IBV(CSIC)                                                                                      | Antonio Rezusta López, Alexander Tishchenko Bar, Ana Milagro, Yolanda Gracia Grataloup, Neves Martínez Camejo and SecCOVID-SPAIN consortium                                                                                                                                                       |
| EPI_ISL_468772 | hCoV-19Spain/Zaragoza2414/2020              | Europe / Spain / Aragon / Teruel                     | 2020-03-24 | Servicio de Microbiología, Hospital Miguel Servet, Zaragoza                                                                                 | SecCOVID-SPAIN consortium/IBV(CSIC)                                                                                      | Antonio Rezusta López, Alexander Tishchenko Bar, Ana Milagro, Yolanda Gracia Grataloup, Neves Martínez Camejo and SecCOVID-SPAIN consortium                                                                                                                                                       |
| EPI_ISL_468774 | hCoV-19Spain/Teruel2454/2020                | Europe / Spain / Aragon / Teruel                     | 2020-03-24 | Servicio de Microbiología, Hospital Miguel Servet, Zaragoza                                                                                 | SecCOVID-SPAIN consortium/IBV(CSIC)                                                                                      | Antonio Rezusta López, Alexander Tishchenko Bar, Ana Milagro, Yolanda Gracia Grataloup, Neves Martínez Camejo and SecCOVID-SPAIN consortium                                                                                                                                                       |
| EPI_ISL_468775 | hCoV-19Spain/Zaragoza2475/2020              | Europe / Spain / Aragon / Zaragoza                   | 2020-03-24 | Servicio de Microbiología, Hospital Miguel Servet, Zaragoza                                                                                 | SecCOVID-SPAIN consortium/IBV(CSIC)                                                                                      | Antonio Rezusta López, Alexander Tishchenko Bar, Ana Milagro, Yolanda Gracia Grataloup, Neves Martínez Camejo and SecCOVID-SPAIN consortium                                                                                                                                                       |
| EPI_ISL_468776 | hCoV-19Spain/Zaragoza2442/2020              | Europe / Spain / Aragon / Zaragoza                   | 2020-03-24 | Servicio de Microbiología, Hospital Miguel Servet, Zaragoza                                                                                 | SecCOVID-SPAIN consortium/IBV(CSIC)                                                                                      | Antonio Rezusta López, Alexander Tishchenko Bar, Ana Milagro, Yolanda Gracia Grataloup, Neves Martínez Camejo and SecCOVID-SPAIN consortium                                                                                                                                                       |
| EPI_ISL_468777 | hCoV-19Spain/Zaragoza2435/2020              | Europe / Spain / Aragon / Zaragoza                   | 2020-03-23 | Servicio de Microbiología, Hospital Miguel Servet, Zaragoza                                                                                 | SecCOVID-SPAIN consortium/IBV(CSIC)                                                                                      | Antonio Rezusta López, Alexander Tishchenko Bar, Ana Milagro, Yolanda Gracia Grataloup, Neves Martínez Camejo and SecCOVID-SPAIN consortium                                                                                                                                                       |
| EPI_ISL_468780 | hCoV-19Spain/Zaragoza2485/2020              | Europe / Spain / Aragon / Zaragoza                   | 2020-03-24 | Servicio de Microbiología, Hospital Miguel Servet, Zaragoza                                                                                 | SecCOVID-SPAIN consortium/IBV(CSIC)                                                                                      | Antonio Rezusta López, Alexander Tishchenko Bar, Ana Milagro, Yolanda Gracia Grataloup, Neves Martínez Camejo and SecCOVID-SPAIN consortium                                                                                                                                                       |
| EPI_ISL_468782 | hCoV-19Spain/Zaragoza2409/2020              | Europe / Spain / Aragon / Zaragoza                   | 2020-03-27 | Servicio de Microbiología, Hospital Miguel Servet, Zaragoza                                                                                 | SecCOVID-SPAIN consortium/IBV(CSIC)                                                                                      | Antonio Rezusta López, Alexander Tishchenko Bar, Ana Milagro, Yolanda Gracia Grataloup, Neves Martínez Camejo and SecCOVID-SPAIN consortium                                                                                                                                                       |
| EPI_ISL_468787 | hCoV-19Spain/Zaragoza2488/2020              | Europe / Spain / Aragon / Zaragoza                   | 2020-03-24 | Servicio de Microbiología, Hospital Miguel Servet, Zaragoza                                                                                 | SecCOVID-SPAIN consortium/IBV(CSIC)                                                                                      | Antonio Rezusta López, Alexander Tishchenko Bar, Ana Milagro, Yolanda Gracia Grataloup, Neves Martínez Camejo and SecCOVID-SPAIN consortium                                                                                                                                                       |
| EPI_ISL_468788 | hCoV-19Spain/Zaragoza2432/2020              | Europe / Spain / Aragon / Zaragoza                   | 2020-03-24 | Servicio de Microbiología, Hospital Miguel Servet, Zaragoza                                                                                 | SecCOVID-SPAIN consortium/IBV(CSIC)                                                                                      | Antonio Rezusta López, Alexander Tishchenko Bar, Ana Milagro, Yolanda Gracia Grataloup, Neves Martínez Camejo and SecCOVID-SPAIN consortium                                                                                                                                                       |
| EPI_ISL_468791 | hCoV-19Spain/Zaragoza2458/2020              | Europe / Spain / Aragon / Zaragoza                   | 2020-03-26 | Servicio de Microbiología, Hospital Miguel Servet, Zaragoza                                                                                 | SecCOVID-SPAIN consortium/IBV(CSIC)                                                                                      | Antonio Rezusta López, Alexander Tishchenko Bar, Ana Milagro, Yolanda Gracia Grataloup, Neves Martínez Camejo and SecCOVID-SPAIN consortium                                                                                                                                                       |
| EPI_ISL_468793 | hCoV-19Spain/Zaragoza2439/2020              | Europe / Spain / Aragon / Zaragoza                   | 2020-03-27 | Servicio de Microbiología, Hospital Miguel Servet, Zaragoza                                                                                 | SecCOVID-SPAIN consortium/IBV(CSIC)                                                                                      | Antonio Rezusta López, Alexander Tishchenko Bar, Ana Milagro, Yolanda Gracia Grataloup, Neves Martínez Camejo and SecCOVID-SPAIN consortium                                                                                                                                                       |
| EPI_ISL_468795 | hCoV-19Spain/Alicante2398/2020              | Europe / Spain / Aragon / Alicante                   | 2020-03-26 | Servicio de Microbiología, Hospital Miguel Servet, Zaragoza                                                                                 | SecCOVID-SPAIN consortium/IBV(CSIC)                                                                                      | Antonio Rezusta López, Alexander Tishchenko Bar, Ana Milagro, Yolanda Gracia Grataloup, Neves Martínez Camejo and SecCOVID-SPAIN consortium                                                                                                                                                       |
| EPI_ISL_468798 | hCoV-19Spain/Zaragoza2415/2020              | Europe / Spain / Aragon / Zaragoza                   | 2020-03-23 | Servicio de Microbiología, Hospital Miguel Servet, Zaragoza                                                                                 | SecCOVID-SPAIN consortium/IBV(CSIC)                                                                                      | Antonio Rezusta López, Alexander Tishchenko Bar, Ana Milagro, Yolanda Gracia Grataloup, Neves Martínez Camejo and SecCOVID-SPAIN consortium                                                                                                                                                       |
| EPI_ISL_468801 | hCoV-19Spain/Alicante2390/2020              | Europe / Spain / Aragon / Alicante                   | 2020-03-27 | Servicio de Microbiología, Hospital Miguel Servet, Zaragoza                                                                                 | SecCOVID-SPAIN consortium/IBV(CSIC)                                                                                      | Antonio Rezusta López, Alexander Tishchenko Bar, Ana Milagro, Yolanda Gracia Grataloup, Neves Martínez Camejo and SecCOVID-SPAIN consortium                                                                                                                                                       |
| EPI_ISL_468802 | hCoV-19Spain/Zaragoza2467/2020              | Europe / Spain / Aragon / Zaragoza                   | 2020-03-18 | Servicio de Microbiología, Hospital Miguel Servet, Zaragoza                                                                                 | SecCOVID-SPAIN consortium/IBV(CSIC)                                                                                      | Antonio Rezusta López, Alexander Tishchenko Bar, Ana Milagro, Yolanda Gracia Grataloup, Neves Martínez Camejo and SecCOVID-SPAIN consortium                                                                                                                                                       |
| EPI_ISL_468804 | hCoV-19Spain/Zaragoza2486/2020              | Europe / Spain / Aragon / Zaragoza                   | 2020-03-24 | Servicio de Microbiología, Hospital Miguel Servet, Zaragoza                                                                                 | SecCOVID-SPAIN consortium/IBV(CSIC)                                                                                      | Antonio Rezusta López, Alexander Tishchenko Bar, Ana Milagro, Yolanda Gracia Grataloup, Neves Martínez Camejo and SecCOVID-SPAIN consortium                                                                                                                                                       |
| EPI_ISL_468805 | hCoV-19Spain/Zaragoza2428/2020              | Europe / Spain / Aragon / Zaragoza                   | 2020-03-26 | Servicio de Microbiología, Hospital Miguel Servet, Zaragoza                                                                                 | SecCOVID-SPAIN consortium/IBV(CSIC)                                                                                      | Antonio Rezusta López, Alexander Tishchenko Bar, Ana Milagro, Yolanda Gracia Grataloup, Neves Martínez Camejo and SecCOVID-SPAIN consortium                                                                                                                                                       |
| EPI_ISL_468808 | hCoV-19Spain/Zaragoza2445/2020              | Europe / Spain / Aragon / Zaragoza                   | 2020-03-23 | Servicio de Microbiología, Hospital Miguel Servet, Zaragoza                                                                                 | SecCOVID-SPAIN consortium/IBV(CSIC)                                                                                      | Antonio Rezusta López, Alexander Tishchenko Bar, Ana Milagro, Yolanda Gracia Grataloup, Neves Martínez Camejo and SecCOVID-SPAIN consortium                                                                                                                                                       |
| EPI_ISL_468809 | hCoV-19Spain/Teruel2441/2020                | Europe / Spain / Aragon / Teruel                     | 2020-03-28 | Servicio de Microbiología, Hospital Miguel Servet, Zaragoza                                                                                 | SecCOVID-SPAIN consortium/IBV(CSIC)                                                                                      | Antonio Rezusta López, Alexander Tishchenko Bar, Ana Milagro, Yolanda Gracia Grataloup, Neves Martínez Camejo and SecCOVID-SPAIN consortium                                                                                                                                                       |
| EPI_ISL_468810 | hCoV-19Spain/Zaragoza2465/2020              | Europe / Spain / Aragon / Zaragoza                   | 2020-03-24 | Servicio de Microbiología, Hospital Miguel Servet, Zaragoza                                                                                 | SecCOVID-SPAIN consortium/IBV(CSIC)                                                                                      | Antonio Rezusta López, Alexander Tishchenko Bar, Ana Milagro, Yolanda Gracia Grataloup, Neves Martínez Camejo and SecCOVID-SPAIN consortium                                                                                                                                                       |
| EPI_ISL_468812 | hCoV-19Spain/Zaragoza2438/2020              | Europe / Spain / Aragon / Zaragoza                   | 2020-03-26 | Servicio de Microbiología, Hospital Miguel Servet, Zaragoza                                                                                 | SecCOVID-SPAIN consortium/IBV(CSIC)                                                                                      | Antonio Rezusta López, Alexander Tishchenko Bar, Ana Milagro, Yolanda Gracia Grataloup, Neves Martínez Camejo and SecCOVID-SPAIN consortium                                                                                                                                                       |
| EPI_ISL_468814 | hCoV-19Spain/Teruel2464/2020                | Europe / Spain / Aragon / Teruel                     | 2020-03-24 | Servicio de Microbiología, Hospital Miguel Servet, Zaragoza                                                                                 | SecCOVID-SPAIN consortium/IBV(CSIC)                                                                                      | Antonio Rezusta López, Alexander Tishchenko Bar, Ana Milagro, Yolanda Gracia Grataloup, Neves Martínez Camejo and SecCOVID-SPAIN consortium                                                                                                                                                       |
| EPI_ISL_468815 | hCoV-19Spain/Zaragoza2422/2020              | Europe / Spain / Aragon / Zaragoza                   | 2020-03-24 | Servicio de Microbiología, Hospital Miguel Servet, Zaragoza                                                                                 | SecCOVID-SPAIN consortium/IBV(CSIC)                                                                                      | Antonio Rezusta López, Alexander Tishchenko Bar, Ana Milagro, Yolanda Gracia Grataloup, Neves Martínez Camejo and SecCOVID-SPAIN consortium                                                                                                                                                       |
| EPI_ISL_468817 | hCoV-19Spain/Zaragoza2425/2020              | Europe / Spain / Aragon / Zaragoza                   | 2020-03-23 | Servicio de Microbiología, Hospital Miguel Servet, Zaragoza                                                                                 | SecCOVID-SPAIN consortium/IBV(CSIC)                                                                                      | Antonio Rezusta López, Alexander Tishchenko Bar, Ana Milagro, Yolanda Gracia Grataloup, Neves Martínez Camejo and SecCOVID-SPAIN consortium                                                                                                                                                       |
| EPI_ISL_468820 | hCoV-19Spain/Teruel2421/2020                | Europe / Spain / Aragon / Teruel                     | 2020-03-28 | Servicio de Microbiología, Hospital Miguel Servet, Zaragoza                                                                                 | SecCOVID-SPAIN consortium/IBV(CSIC)                                                                                      | Antonio Rezusta López, Alexander Tishchenko Bar, Ana Milagro, Yolanda Gracia Grataloup, Neves Martínez Camejo and SecCOVID-SPAIN consortium                                                                                                                                                       |
| EPI_ISL_468829 | hCoV-19Spain/Teruel2434/2020                | Europe / Spain / Aragon / Teruel                     | 2020-03-24 | Servicio de Microbiología, Hospital Miguel Servet, Zaragoza                                                                                 | SecCOVID-SPAIN consortium/IBV(CSIC)                                                                                      | Antonio Rezusta López, Alexander Tishchenko Bar, Ana Milagro, Yolanda Gracia Grataloup, Neves Martínez Camejo and SecCOVID-SPAIN consortium                                                                                                                                                       |
| EPI_ISL_468830 | hCoV-19Spain/Teruel2407/2020                | Europe / Spain / Aragon / Teruel                     | 2020-03-17 | Servicio de Microbiología, Hospital Miguel Servet, Zaragoza                                                                                 | SecCOVID-SPAIN consortium/IBV(CSIC)                                                                                      | Antonio Rezusta López, Alexander Tishchenko Bar, Ana Milagro, Yolanda Gracia Grataloup, Neves Martínez Camejo and SecCOVID-SPAIN consortium                                                                                                                                                       |
| EPI_ISL_468832 | hCoV-19Spain/Alicante2406/2020              | Europe / Spain / Aragon / Alicante                   | 2020-03-26 | Servicio de Microbiología, Hospital Miguel Servet, Zaragoza                                                                                 | SecCOVID-SPAIN consortium/IBV(CSIC)                                                                                      | Antonio Rezusta López, Alexander Tishchenko Bar, Ana Milagro, Yolanda Gracia Grataloup, Neves Martínez Camejo and SecCOVID-SPAIN consortium                                                                                                                                                       |
| EPI_ISL_468834 | hCoV-19Spain/Zaragoza2397/2020              | Europe / Spain / Aragon / Zaragoza                   | 2020-03-17 | Servicio de Microbiología, Hospital Miguel Servet, Zaragoza                                                                                 | SecCOVID-SPAIN consortium/IBV(CSIC)                                                                                      | Antonio Rezusta López, Alexander Tishchenko Bar, Ana Milagro, Yolanda Gracia Grataloup, Neves Martínez Camejo and SecCOVID-SPAIN consortium                                                                                                                                                       |
| EPI_ISL_468835 | hCoV-19Spain/Alicante2418/2020              | Europe / Spain / Aragon / Alicante                   | 2020-03-26 | Servicio de Microbiología, Hospital Miguel Servet, Zaragoza                                                                                 | SecCOVID-SPAIN consortium/IBV(CSIC)                                                                                      | Antonio Rezusta López, Alexander Tishchenko Bar, Ana Milagro, Yolanda Gracia Grataloup, Neves Martínez Camejo and SecCOVID-SPAIN consortium                                                                                                                                                       |
| EPI_ISL_468839 | hCoV-19Spain/Teruel2431/2020                | Europe / Spain / Aragon / Teruel                     | 2020-03-28 | Servicio de Microbiología, Hospital Miguel Servet, Zaragoza                                                                                 | SecCOVID-SPAIN consortium/IBV(CSIC)                                                                                      | Antonio Rezusta López, Alexander Tishchenko Bar, Ana Milagro, Yolanda Gracia Grataloup, Neves Martínez Camejo and SecCOVID-SPAIN consortium                                                                                                                                                       |
| EPI_ISL_468841 | hCoV-19Spain/Zaragoza2426/2020              | Europe / Spain / Aragon / Zaragoza                   | 2020-03-21 | Servicio de Microbiología, Hospital Miguel Servet, Zaragoza                                                                                 | SecCOVID-SPAIN consortium/IBV(CSIC)                                                                                      | Antonio Rezusta López, Alexander Tishchenko Bar, Ana Milagro, Yolanda Gracia Grataloup, Neves Martínez Camejo and SecCOVID-SPAIN consortium                                                                                                                                                       |
| EPI_ISL_468848 | hCoV-19Spain/Zaragoza2443/2020              | Europe / Spain / Aragon / Zaragoza                   | 2020-03-24 | Servicio de Microbiología, Hospital Miguel Servet, Zaragoza                                                                                 | SecCOVID-SPAIN consortium/IBV(CSIC)                                                                                      | Antonio Rezusta López, Alexander Tishchenko Bar, Ana Milagro, Yolanda Gracia Grataloup, Neves Martínez Camejo and SecCOVID-SPAIN consortium                                                                                                                                                       |
| EPI_ISL_468849 | hCoV-19Spain/Alicante2439/2020              | Europe / Spain / Aragon / Alicante                   | 2020-03-27 | Servicio de Microbiología, Hospital Miguel Servet, Zaragoza                                                                                 | SecCOVID-SPAIN consortium/IBV(CSIC)                                                                                      | Antonio Rezusta López, Alexander Tishchenko Bar, Ana Milagro, Yolanda Gracia Grataloup, Neves Martínez Camejo and SecCOVID-SPAIN consortium                                                                                                                                                       |
| EPI_ISL_468851 | hCoV-19Spain/Zaragoza2396/2020              | Europe / Spain / Aragon / Zaragoza                   | 2020-03-24 | Servicio de Microbiología, Hospital Miguel Servet, Zaragoza                                                                                 | SecCOVID-SPAIN consortium/IBV(CSIC)                                                                                      | Antonio Rezusta López, Alexander Tishchenko Bar, Ana Milagro, Yolanda Gracia Grataloup, Neves Martínez Camejo and SecCOVID-SPAIN consortium                                                                                                                                                       |
| EPI_ISL_468855 | hCoV-19Spain/Zaragoza2477/2020              | Europe / Spain / Aragon / Zaragoza                   | 2020-03-26 | Servicio de Microbiología, Hospital Miguel Servet, Zaragoza                                                                                 | SecCOVID-SPAIN consortium/IBV(CSIC)                                                                                      | Antonio Rezusta López, Alexander Tishchenko Bar, Ana Milagro, Yolanda Gracia Grataloup, Neves Martínez Camejo and SecCOVID-SPAIN consortium                                                                                                                                                       |
| EPI_ISL_468857 | hCoV-19Spain/Zaragoza2482/2020              | Europe / Spain / Aragon / Zaragoza                   | 2020-03-23 | Servicio de Microbiología, Hospital Miguel Servet, Zaragoza                                                                                 | SecCOVID-SPAIN consortium/IBV(CSIC)                                                                                      | Antonio Rezusta López, Alexander Tishchenko Bar, Ana Milagro, Yolanda Gracia Grataloup, Neves Martínez Camejo and SecCOVID-SPAIN consortium                                                                                                                                                       |
| EPI_ISL_468858 | hCoV-19Spain/Zaragoza2412/2020              | Europe / Spain / Aragon / Zaragoza                   | 2020-03-24 | Servicio de Microbiología, Hospital Miguel Servet, Zaragoza                                                                                 | SecCOVID-SPAIN consortium/IBV(CSIC)                                                                                      | Antonio Rezusta López, Alexander Tishchenko Bar, Ana Milagro, Yolanda Gracia Grataloup, Neves Martínez Camejo and SecCOVID-SPAIN consortium                                                                                                                                                       |
| EPI_ISL_468859 | hCoV-19Spain/Zaragoza2423/2020              | Europe / Spain / Aragon / Zaragoza                   | 2020-03-24 | Servicio de Microbiología, Hospital Miguel Servet, Zaragoza                                                                                 | SecCOVID-SPAIN consortium/IBV(CSIC)                                                                                      | Antonio Rezusta López, Alexander Tishchenko Bar, Ana Milagro, Yolanda Gracia Grataloup, Neves Martínez Camejo and SecCOVID-SPAIN consortium                                                                                                                                                       |
| EPI_ISL_469275 | hCoV-19Egypt/CUNC-HCG002-2/2020             | Africa / Egypt / Cairo                               | 2020-05-02 | Human Genome Centre                                                                                                                         | Human Genome Centre                                                                                                      | Laurent Meertens, Louise Bonnet-Madin, Séverine Mercier-Delalande, Maud SALMONA, Constantine Delaigues, Ali Amara                                                                                                                                                                                 |
| EPI_ISL_469282 | hCoV-19France/211_80/2020                   | Europe / France / Paris                              | 2020-03-11 | Servicio de Virología Hospital Saint-Louis                                                                                                  | Laboratory of Cell Biology of viral infection, Unit INSERM-UMR144                                                        | Laurent Meertens, Louise Bonnet-Madin, Séverine Mercier-Delalande, Maud SALMONA, Constantine Delaigues, Ali Amara                                                                                                                                                                                 |
| EPI_ISL_469283 | hCoV-19France/221_61/2020                   | Europe / France / Paris                              | 2020-03-18 | Servicio de Virología Hospital Saint-Louis                                                                                                  | Laboratory Cell Biology of Viral Infection-INSERM unit 944                                                               | Laurent Meertens, Louise Bonnet-Madin, Séverine Mercier-Delalande, Maud SALMONA, Constantine Delaigues, Ali Amara                                                                                                                                                                                 |
| EPI_ISL_469284 | hCoV-19France/220_56/2020                   | Europe / France / Paris                              | 2020-03-18 | Servicio de Virología Hospital Saint-Louis                                                                                                  | Laboratory Cell Biology of Viral Infection-INSERM unit 944                                                               | Laurent Meertens, Louise Bonnet-Madin, Séverine Mercier-Delalande, Maud SALMONA, Constantine Delaigues, Ali Amara                                                                                                                                                                                 |
| EPI_ISL_470802 | hCoV-19Wuhan/Tongji-04-2/2020               | Asia / China / Wuhan                                 | 2020-04-20 | State Key Laboratory of Agriculture Microbiology                                                                                            | State Key Laboratory of Agriculture Microbiology, Huazhong Agric                                                         | Zhong Zou                                                                                                                                                                                                                                                                                         |
| EPI_ISL_471267 | hCoV-19Ecuador/USFQ-020/2020                | South America / Ecuador / Los Rios / Bat             | 2020-04-17 | Hospital IESS Babahoyo                                                                                                                      | Institute of Microbiology, Universidad San Francisco de Quito                                                            | Sully Márquez, Belén Prado-Vivar, Juan José Guadalupe, Bernardo Gutiérrez, Francisco Corbina, Nélio Henriques, Kellen Briones-Zamora, Kellen Briones-Claudette, Verónica Barragán, Patricia Rojas-Riva, Gabriel Trueta, Michelle Grunauer, Paul Cárdenas                                          |
| EPI_ISL_471269 | hCoV-19Ecuador/USFQ-707/2020                | South America / Ecuador / Quito                      | 2020-06-04 | Hospital Oncológico Solta Nódios de Quito                                                                                                   | Institute of Microbiology, Universidad San Francisco de Quito                                                            | Sully Márquez, Belén Prado-Vivar, Juan José Guadalupe, Bernardo Gutiérrez, Marcos Di Stefano, Grace Salazar, Verónica Barragán, Patricia Rojas-Riva, Gabriel Trueta, Michelle Grunauer, Paul Cárdenas                                                                                             |
| EPI_ISL_471416 | hCoV-19Romania/Buzau-291946/2020            | Europe / Romania / Buzau                             | 2020-06-01 | Laboratory for Respiratory Viruses, National Influenza Centre, Cantacuzino National Military-Medical Institute for Research and Development | Cantacuzino Institute                                                                                                    | Luiza Ustia, Nicoleta Paraschiv, Tim Durfee, Mihaela Lazar                                                                                                                                                                                                                                        |
| EPI_ISL_471417 | hCoV-19Romania/Buzau-292711/2020            | Europe / Romania / Buzau                             | 2020-06-03 | Laboratory for Respiratory Viruses, National Influenza Centre, Cantacuzino National Military-Medical Institute for Research and Development | Cantacuzino Institute                                                                                                    | Luiza Ustia, Nicoleta Paraschiv, Tim Durfee, Mihaela Lazar                                                                                                                                                                                                                                        |
| EPI_ISL_471418 | hCoV-19Romania/Focara-268927/2020           | Europe / Romania / Vrancea / Focara                  | 2020-04-09 | Laboratory for Respiratory Viruses, National Influenza Centre, Cantacuzino National Military-Medical Institute for Research and Development | Cantacuzino Institute                                                                                                    | Luiza Ustia, Nicoleta Paraschiv, Tim Durfee, Mihaela Lazar                                                                                                                                                                                                                                        |
| EPI_ISL_471419 | hCoV-19Romania/Buzau-293197/2020            | Europe / Romania / Buzau                             | 2020-06-03 | Laboratory for Respiratory Viruses, National Influenza Centre, Cantacuzino National Military-Medical Institute for Research and Development | Cantacuzino Institute                                                                                                    | Luiza Ustia, Nicoleta Paraschiv, Tim Durfee, Mihaela Lazar                                                                                                                                                                                                                                        |
| EPI_ISL_471420 | hCoV-19Romania/Bucuresti-293034/2020        | Europe / Romania / Bucuresti                         | 2020-06-04 | Laboratory for Respiratory Viruses, National Influenza Centre, Cantacuzino National Military-Medical Institute for Research and Development | Cantacuzino Institute                                                                                                    | Luiza Ustia, Nicoleta Paraschiv, Tim Durfee, Mihaela Lazar                                                                                                                                                                                                                                        |
| EPI_ISL_471421 | hCoV-19Romania/Iasi-296512/2020             | Europe / Romania / Suceava / Iasi                    | 2020-06-10 | Laboratory for Respiratory Viruses, National Influenza Centre, Cantacuzino National Military-Medical Institute for Research and Development | Cantacuzino Institute                                                                                                    | Luiza Ustia, Nicoleta Paraschiv, Tim Durfee, Mihaela Lazar                                                                                                                                                                                                                                        |
| EPI_ISL_471422 | hCoV-19Romania/Bucuresti-294285/2020        | Europe / Romania / Bucuresti                         | 2020-06-07 | Laboratory for Respiratory Viruses, National Influenza Centre, Cantacuzino National Military-Medical Institute for Research and Development | Cantacuzino Institute                                                                                                    | Luiza Ustia, Nicoleta Paraschiv, Tim Durfee, Mihaela Lazar                                                                                                                                                                                                                                        |
| EPI_ISL_471423 | hCoV-19Romania/Buzau-292638/2020            | Europe / Romania / Buzau                             | 2020-06-04 | Laboratory for Respiratory Viruses, National Influenza Centre, Cantacuzino National Military-Medical Institute for Research and Development | Cantacuzino Institute                                                                                                    | Luiza Ustia, Nicoleta Paraschiv, Tim Durfee, Mihaela Lazar                                                                                                                                                                                                                                        |
| EPI_ISL_471424 | hCoV-19Romania/Valea/2020                   | Europe / Romania / Valea                             | 2020-06-07 | Laboratory for Respiratory Viruses, National Influenza Centre, Cantacuzino National Military-Medical Institute for Research and Development | Cantacuzino Institute                                                                                                    | Luiza Ustia, Nicoleta Paraschiv, Tim Durfee, Mihaela Lazar                                                                                                                                                                                                                                        |



|                |                                           |                                           |                 |                                                                                                       |                                                                                                                                     |                                                                                                                                                                                                                                                                                                                                                                                                                                                                                                                                                                                                         |
|----------------|-------------------------------------------|-------------------------------------------|-----------------|-------------------------------------------------------------------------------------------------------|-------------------------------------------------------------------------------------------------------------------------------------|---------------------------------------------------------------------------------------------------------------------------------------------------------------------------------------------------------------------------------------------------------------------------------------------------------------------------------------------------------------------------------------------------------------------------------------------------------------------------------------------------------------------------------------------------------------------------------------------------------|
| EPI_ISL_471456 | hCoV-19/Morocco/HMMV-Rabat102-03/2020     | Africa / Morocco / Rabat                  | 2020-03-31      | Centre de Virologie des Maladies Tropicales                                                           | Functional Genomic Platform/Service Analyses<br>Biologues/UTRS/ Centre National Pour la Recherche Scientifique Et Technique (CHRST) | Hicham ANNAZ, Elmohata EL FAHME, Marouane MELLOUL, Yasmine AKHOUD, My Abdelaziz ELALAOUI, Ahmed REGGAD, Samia ALAKOU-Annine, Rachid ABI, Riya TAGAJIDIO, Zhor KASMY, Safaa ELKORCHI, Nadia TOULI, Farida HILALI, Abdelkader LAATIRIS, Abdelilah LARAQZI, Tahra BAJJOU, Yasmine SEKHSONH, Idries-Amine LAHLOU, Mostafa EL-OUENASS, Khelil ENNEBI                                                                                                                                                                                                                                                         |
| EPI_ISL_471457 | hCoV-19/Morocco/HMMV-Rabat1025-04/2020    | Africa / Morocco / Rabat                  | 2020-04-13      | Centre de Virologie des Maladies Tropicales                                                           | Functional Genomic Platform/Service Analyses<br>Biologues/UTRS/ Centre National Pour la Recherche Scientifique Et Technique (CHRST) | Hicham ANNAZ, Elmohata EL FAHME, Marouane MELLOUL, Yasmine AKHOUD, My Abdelaziz ELALAOUI, Ahmed REGGAD, Samia ALAKOU-Annine, Rachid ABI, Riya TAGAJIDIO, Zhor KASMY, Safaa ELKORCHI, Nadia TOULI, Farida HILALI, Abdelkader LAATIRIS, Abdelilah LARAQZI, Tahra BAJJOU, Yasmine SEKHSONH, Idries-Amine LAHLOU, Mostafa EL-OUENASS, Khelil ENNEBI                                                                                                                                                                                                                                                         |
| EPI_ISL_471458 | hCoV-19/Morocco/HMMV-Rabat1429-04/2020    | Africa / Morocco / Rabat                  | 2020-04-19      | Centre de Virologie des Maladies Tropicales                                                           | Functional Genomic Platform/Service Analyses<br>Biologues/UTRS/ Centre National Pour la Recherche Scientifique Et Technique (CHRST) | Hicham ANNAZ, Elmohata EL FAHME, Marouane MELLOUL, Yasmine AKHOUD, My Abdelaziz ELALAOUI, Ahmed REGGAD, Samia ALAKOU-Annine, Rachid ABI, Riya TAGAJIDIO, Zhor KASMY, Safaa ELKORCHI, Nadia TOULI, Farida HILALI, Abdelkader LAATIRIS, Abdelilah LARAQZI, Tahra BAJJOU, Yasmine SEKHSONH, Idries-Amine LAHLOU, Mostafa EL-OUENASS, Khelil ENNEBI                                                                                                                                                                                                                                                         |
| EPI_ISL_471459 | hCoV-19/Morocco/HMMV-Rabat1435-04/2020    | Africa / Morocco / Rabat                  | 2020-04-19      | Centre de Virologie des Maladies Tropicales                                                           | Functional Genomic Platform/Service Analyses<br>Biologues/UTRS/ Centre National Pour la Recherche Scientifique Et Technique (CHRST) | Hicham ANNAZ, Elmohata EL FAHME, Marouane MELLOUL, Yasmine AKHOUD, My Abdelaziz ELALAOUI, Ahmed REGGAD, Samia ALAKOU-Annine, Rachid ABI, Riya TAGAJIDIO, Zhor KASMY, Safaa ELKORCHI, Nadia TOULI, Farida HILALI, Abdelkader LAATIRIS, Abdelilah LARAQZI, Tahra BAJJOU, Yasmine SEKHSONH, Idries-Amine LAHLOU, Mostafa EL-OUENASS, Khelil ENNEBI                                                                                                                                                                                                                                                         |
| EPI_ISL_471460 | hCoV-19/Morocco/HMMV-Rabat1462-04/2020    | Africa / Morocco / Rabat                  | 2020-04-19      | Centre de Virologie des Maladies Tropicales                                                           | Functional Genomic Platform/Service Analyses<br>Biologues/UTRS/ Centre National Pour la Recherche Scientifique Et Technique (CHRST) | Hicham ANNAZ, Elmohata EL FAHME, Marouane MELLOUL, Yasmine AKHOUD, My Abdelaziz ELALAOUI, Ahmed REGGAD, Samia ALAKOU-Annine, Rachid ABI, Riya TAGAJIDIO, Zhor KASMY, Safaa ELKORCHI, Nadia TOULI, Farida HILALI, Abdelkader LAATIRIS, Abdelilah LARAQZI, Tahra BAJJOU, Yasmine SEKHSONH, Idries-Amine LAHLOU, Mostafa EL-OUENASS, Khelil ENNEBI                                                                                                                                                                                                                                                         |
| EPI_ISL_471466 | hCoV-19/pangolin/GuangdongCNA31-S/2019    | Asia / China / Guangdong                  | 2020-04-19 2019 | Centre de Virologie des Maladies Tropicales<br>South China Agricultural University                    | Functional Genomic Platform/Service Analyses<br>Biologues/UTRS/ Centre National Pour la Recherche Scientifique Et Technique (CHRST) | Hicham ANNAZ, Elmohata EL FAHME, Marouane MELLOUL, Yasmine AKHOUD, My Abdelaziz ELALAOUI, Ahmed REGGAD, Samia ALAKOU-Annine, Rachid ABI, Riya TAGAJIDIO, Zhor KASMY, Safaa ELKORCHI, Nadia TOULI, Farida HILALI, Abdelkader LAATIRIS, Abdelilah LARAQZI, Tahra BAJJOU, Yasmine SEKHSONH, Idries-Amine LAHLOU, Mostafa EL-OUENASS, Khelil ENNEBI                                                                                                                                                                                                                                                         |
| EPI_ISL_471472 | hCoV-19/Spain/iscica-IP/2020              | Europe / Spain / Barcelona                | 2020-03-18      | Hospital Universitari Germans Trias i Pujol(HUGTIP)/Fundació Lluís contra la SIDA (FLSIDay)/RTA-CReSA | InfCalva AIDS Research Lab<br>State Veterinary Institute Prague and The National Institute of Public Health                         | Nagy A.Jirincova,H.Novakova,L.Tmkia,D.Veceroz,J                                                                                                                                                                                                                                                                                                                                                                                                                                                                                                                                                         |
| EPI_ISL_471528 | hCoV-19/Czech Republic/NRL_1751/2020      | Europe / Czech Republic / Litomerice-Bř   | 2020-03-09      | The National Institute of Public Health                                                               | State Veterinary Institute Prague and The National Institute of Public Health                                                       | Nagy A.Jirincova,H.Novakova,L.Tmkia,D.Veceroz,J                                                                                                                                                                                                                                                                                                                                                                                                                                                                                                                                                         |
| EPI_ISL_471530 | hCoV-19/Czech Republic/NRL_1885/2020      | Europe / Czech Republic / Melnik          | 2020-03-10      | The National Institute of Public Health                                                               | State Veterinary Institute Prague and The National Institute of Public Health                                                       | Nagy A.Jirincova,H.Novakova,L.Tmkia,D.Veceroz,J                                                                                                                                                                                                                                                                                                                                                                                                                                                                                                                                                         |
| EPI_ISL_471539 | hCoV-19/Brazil/SP-47/2020                 | South America / Brazil / Sao Paulo / Sao  | 2020-03-19      | Hospital Universitario da USP Sao Paulo                                                               | Instituto Adolfo Lutz, Interdisciplinary Procedures Center, Strategic Laboratory                                                    | Claudio Tavares Sacchi, Claudia Regina Gonçalves, Erica Veleassa Ramos Gomes                                                                                                                                                                                                                                                                                                                                                                                                                                                                                                                            |
| EPI_ISL_471540 | hCoV-19/Czech Republic/NRL_2307/2020      | Europe / Czech Republic / Vysočina / Kyj  | 2020-03-10      | The National Institute of Public Health                                                               | State Veterinary Institute Prague and The National Institute of Public Health                                                       | Nagy A.Jirincova,H.Novakova,L.Tmkia,D.Veceroz,J                                                                                                                                                                                                                                                                                                                                                                                                                                                                                                                                                         |
| EPI_ISL_471541 | hCoV-19/Brazil/SP-126/2020                | South America / Brazil / Sao Paulo / Sao  | 2020-04-02      | Hospital Geral Santa Marcelina                                                                        | Instituto Adolfo Lutz, Interdisciplinary Procedures Center, Strategic Laboratory                                                    | Claudio Tavares Sacchi, Claudia Regina Gonçalves, Erica Veleassa Ramos Gomes                                                                                                                                                                                                                                                                                                                                                                                                                                                                                                                            |
| EPI_ISL_471542 | hCoV-19/Brazil/SP-127/2020                | South America / Brazil / Sao Paulo / Mog  | 2020-04-03      | Secretaria de Saude de Mogi das Cruzes                                                                | Instituto Adolfo Lutz, Interdisciplinary Procedures Center, Strategic Laboratory                                                    | Claudio Tavares Sacchi, Claudia Regina Gonçalves, Erica Veleassa Ramos Gomes                                                                                                                                                                                                                                                                                                                                                                                                                                                                                                                            |
| EPI_ISL_471543 | hCoV-19/Brazil/SP-131/2020                | South America / Brazil / Sao Paulo / Pres | 2020-04-04      | Centro de Saude I Tacio Leite de Carvalho e Silva                                                     | Instituto Adolfo Lutz, Interdisciplinary Procedures Center, Strategic Laboratory                                                    | Claudio Tavares Sacchi, Claudia Regina Gonçalves, Erica Veleassa Ramos Gomes                                                                                                                                                                                                                                                                                                                                                                                                                                                                                                                            |
| EPI_ISL_471544 | hCoV-19/Czech Republic/NRL_2312/2020      | Europe / Czech Republic / Vysočina / Kyj  | 2020-03-14      | The National Institute of Public Health                                                               | State Veterinary Institute Prague and The National Institute of Public Health                                                       | Nagy A.Jirincova,H.Novakova,L.Tmkia,D.Veceroz,J                                                                                                                                                                                                                                                                                                                                                                                                                                                                                                                                                         |
| EPI_ISL_471545 | hCoV-19/Brazil/SP-801/2020                | South America / Brazil / Sao Paulo / Sao  | 2020-03-22      | Hospital Sao Paulo de Ensino da Unifesp                                                               | Instituto Adolfo Lutz, Interdisciplinary Procedures Center, Strategic Laboratory                                                    | Claudio Tavares Sacchi, Claudia Regina Gonçalves, Erica Veleassa Ramos Gomes                                                                                                                                                                                                                                                                                                                                                                                                                                                                                                                            |
| EPI_ISL_471546 | hCoV-19/Brazil/SP-537/2020                | South America / Brazil / Sao Paulo / Sao  | 2020-03-20      | AMADR Jose Soares Hungria                                                                             | Instituto Adolfo Lutz, Interdisciplinary Procedures Center, Strategic Laboratory                                                    | Claudio Tavares Sacchi, Claudia Regina Gonçalves, Erica Veleassa Ramos Gomes                                                                                                                                                                                                                                                                                                                                                                                                                                                                                                                            |
| EPI_ISL_471547 | hCoV-19/Czech Republic/NRL_2554/2020      | Europe / Czech Republic / Prague          | 2020-03-11      | The National Institute of Public Health                                                               | State Veterinary Institute Prague and The National Institute of Public Health                                                       | Nagy A.Jirincova,H.Novakova,L.Tmkia,D.Veceroz,J                                                                                                                                                                                                                                                                                                                                                                                                                                                                                                                                                         |
| EPI_ISL_471548 | hCoV-19/Brazil/SP-606/2020                | South America / Brazil / Sao Paulo / Sao  | 2020-04-10      | Hospital do Servidor Público Estadual Francisco Morato de Oliveira                                    | Instituto Adolfo Lutz, Interdisciplinary Procedures Center, Strategic Laboratory                                                    | Claudio Tavares Sacchi, Claudia Regina Gonçalves, Erica Veleassa Ramos Gomes                                                                                                                                                                                                                                                                                                                                                                                                                                                                                                                            |
| EPI_ISL_471549 | hCoV-19/Brazil/SP-607/2020                | South America / Brazil / Sao Paulo / Sao  | 2020-04-13      | Hospital Municipal Carmen Prudente                                                                    | Instituto Adolfo Lutz, Interdisciplinary Procedures Center, Strategic Laboratory                                                    | Claudio Tavares Sacchi, Claudia Regina Gonçalves, Erica Veleassa Ramos Gomes                                                                                                                                                                                                                                                                                                                                                                                                                                                                                                                            |
| EPI_ISL_471550 | hCoV-19/Czech Republic/NRL_5240/2020      | Europe / Czech Republic / Jihlava         | 2020-03-23      | The National Institute of Public Health                                                               | State Veterinary Institute Prague and The National Institute of Public Health                                                       | Nagy A.Jirincova,H.Novakova,L.Tmkia,D.Veceroz,J                                                                                                                                                                                                                                                                                                                                                                                                                                                                                                                                                         |
| EPI_ISL_471551 | hCoV-19/Brazil/SP-545/2020                | South America / Brazil / Sao Paulo / Sao  | 2020-04-10      | Hospital Sao Paulo de Ensino da Unifesp                                                               | Instituto Adolfo Lutz, Interdisciplinary Procedures Center, Strategic Laboratory                                                    | Claudio Tavares Sacchi, Claudia Regina Gonçalves, Erica Veleassa Ramos Gomes                                                                                                                                                                                                                                                                                                                                                                                                                                                                                                                            |
| EPI_ISL_471552 | hCoV-19/Brazil/SP-549/2020                | South America / Brazil / Sao Paulo / Sao  | 2020-04-01      | Hospital Sancta Maggione                                                                              | Instituto Adolfo Lutz, Interdisciplinary Procedures Center, Strategic Laboratory                                                    | Claudio Tavares Sacchi, Claudia Regina Gonçalves, Erica Veleassa Ramos Gomes                                                                                                                                                                                                                                                                                                                                                                                                                                                                                                                            |
| EPI_ISL_471553 | hCoV-19/Czech Republic/NRL_5186/2020      | Europe / Czech Republic / Prague          | 2020-03-17      | The National Institute of Public Health                                                               | State Veterinary Institute Prague and The National Institute of Public Health                                                       | Nagy A.Jirincova,H.Novakova,L.Tmkia,D.Veceroz,J                                                                                                                                                                                                                                                                                                                                                                                                                                                                                                                                                         |
| EPI_ISL_471554 | hCoV-19/Brazil/SP-551/2020                | South America / Brazil / Sao Paulo / Sao  | 2020-03-29      | Hospital Banque da Saude                                                                              | Instituto Adolfo Lutz, Interdisciplinary Procedures Center, Strategic Laboratory                                                    | Claudio Tavares Sacchi, Claudia Regina Gonçalves, Erica Veleassa Ramos Gomes                                                                                                                                                                                                                                                                                                                                                                                                                                                                                                                            |
| EPI_ISL_471555 | hCoV-19/Czech Republic/NRL_5184/2020      | Europe / Czech Republic / Prague          | 2020-03-17      | The National Institute of Public Health                                                               | State Veterinary Institute Prague and The National Institute of Public Health                                                       | Nagy A.Jirincova,H.Novakova,L.Tmkia,D.Veceroz,J                                                                                                                                                                                                                                                                                                                                                                                                                                                                                                                                                         |
| EPI_ISL_471556 | hCoV-19/Brazil/SP-512/2020                | South America / Brazil / Sao Paulo / Osa  | 2020-04-18      | Pronto Socorro Jose Ibrahim                                                                           | Instituto Adolfo Lutz, Interdisciplinary Procedures Center, Strategic Laboratory                                                    | Claudio Tavares Sacchi, Claudia Regina Gonçalves, Erica Veleassa Ramos Gomes                                                                                                                                                                                                                                                                                                                                                                                                                                                                                                                            |
| EPI_ISL_471562 | hCoV-19/Brazil/SP-523/2020                | South America / Brazil / Sao Paulo / Sao  | 2020-04-29      | Hosp. Municipal Prof. Dr. Alípio Corrêa Netto                                                         | Instituto Adolfo Lutz, Interdisciplinary Procedures Center, Strategic Laboratory                                                    | Claudio Tavares Sacchi, Claudia Regina Gonçalves, Erica Veleassa Ramos Gomes                                                                                                                                                                                                                                                                                                                                                                                                                                                                                                                            |
| EPI_ISL_471561 | hCoV-19/Brazil/SP-524/2020                | South America / Brazil / Sao Paulo / Sao  | 2020-04-29      | Hosp. Municipal Prof. Dr. Alípio Corrêa Netto                                                         | Instituto Adolfo Lutz, Interdisciplinary Procedures Center, Strategic Laboratory                                                    | Claudio Tavares Sacchi, Claudia Regina Gonçalves, Erica Veleassa Ramos Gomes                                                                                                                                                                                                                                                                                                                                                                                                                                                                                                                            |
| EPI_ISL_471582 | hCoV-19/Brazil/BacCode11C37_P12519C525_AS | South America / Brazil / Sao Paulo / Sao  | 2020-04-29      | Hosp. Municipal Prof. Dr. Alípio Corrêa Netto                                                         | Instituto Adolfo Lutz, Interdisciplinary Procedures Center, Strategic Laboratory                                                    | Claudio Tavares Sacchi, Claudia Regina Gonçalves, Erica Veleassa Ramos Gomes                                                                                                                                                                                                                                                                                                                                                                                                                                                                                                                            |
| EPI_ISL_475026 | hCoV-19/India/GBRC203a/2020               | Asia / India / Gujarat / Patanpur         | 2020-06-07      | Banas Medical College and Research Institute                                                          | Gujarat Biotechnology Research Centre                                                                                               | Sunil R Joshi, Viren s Doshi, Pritesh Sabara, Apurvash Puvur, Janvi Ravai, Zama Patel, Monika Gandhi, Pinal Trivedi, Mahanshi Pandya, Nidhi Patel, Nalin Savaliya, Raghawendra Kumar, Dinesh Kumar, Zuber Sayyed, Komal Patel, Labdhi Pandya, Snehal Bagatharia, Radhika Khara, Neha Rapara, R D Dixit, A M Kadi, Harsh Bakshi, Chaitanya Joshi, Madhu Joshi                                                                                                                                                                                                                                            |
| EPI_ISL_475027 | hCoV-19/India/GBRC203b/2020               | Asia / India / Gujarat / Patanpur         | 2020-06-07      | Banas Medical College and Research Institute                                                          | Gujarat Biotechnology Research Centre                                                                                               | Viren s Doshi, Pritesh Sabara, Apurvash Puvur, Janvi Ravai, Zama Patel, Monika Gandhi, Pinal Trivedi, Mahanshi Pandya, Nidhi Patel, Nalin Savaliya, Raghawendra Kumar, Dinesh Kumar, Zuber Sayyed, Komal Patel, Labdhi Pandya, Snehal Bagatharia, Radhika Khara, Sunil R Joshi, Atzai Ansari, R D Dixit, A M Kadi, Harsh Bakshi, Chaitanya Joshi, Madhu Joshi                                                                                                                                                                                                                                           |
| EPI_ISL_475028 | hCoV-19/India/GBRC204a/2020               | Asia / India / Gujarat / Patanpur         | 2020-06-07      | Banas Medical College and Research Institute                                                          | Gujarat Biotechnology Research Centre                                                                                               | Pritesh Sabara, Apurvash Puvur, Janvi Ravai, Zama Patel, Monika Gandhi, Pinal Trivedi, Mahanshi Pandya, Nidhi Patel, Nalin Savaliya, Raghawendra Kumar, Dinesh Kumar, Zuber Sayyed, Komal Patel, Labdhi Pandya, Snehal Bagatharia, Radhika Khara, Sunil R Joshi, Atzai Ansari, R D Dixit, A M Kadi, Harsh Bakshi, Chaitanya Joshi, Madhu Joshi                                                                                                                                                                                                                                                          |
| EPI_ISL_475029 | hCoV-19/India/GBRC204b/2020               | Asia / India / Gujarat / Patanpur         | 2020-06-07      | Banas Medical College and Research Institute                                                          | Gujarat Biotechnology Research Centre                                                                                               | Apurvash Puvur, Janvi Ravai, Zama Patel, Monika Gandhi, Pinal Trivedi, Mahanshi Pandya, Nidhi Patel, Nalin Savaliya, Raghawendra Kumar, Dinesh Kumar, Zuber Sayyed, Komal Patel, Labdhi Pandya, Snehal Bagatharia, Radhika Khara, Sunil R Joshi, Viren s Doshi, Pritesh Sabara, Neesam Nathani, R D Dixit, A M Kadi, Harsh Bakshi, Chaitanya Joshi, Madhu Joshi                                                                                                                                                                                                                                         |
| EPI_ISL_475030 | hCoV-19/India/GBRC205a/2020               | Asia / India / Gujarat / Surat            | 2020-06-11      | Department of Microbiology, Government Medical College, Surat                                         | Gujarat Biotechnology Research Centre                                                                                               | Janvi Ravai, Zama Patel, Monika Gandhi, Pinal Trivedi, Mahanshi Pandya, Nidhi Patel, Nalin Savaliya, Raghawendra Kumar, Dinesh Kumar, Zuber Sayyed, Komal Patel, Labdhi Pandya, Snehal Bagatharia, Naresh Chauhan, Summayya Mullan, Amit gamit, Pritesh Sabara, Apurvash Puvur, Arni Chaudhari, R D Dixit, A M Kadi, Harsh Bakshi, Chaitanya Joshi, Madhu Joshi                                                                                                                                                                                                                                         |
| EPI_ISL_475031 | hCoV-19/India/GBRC205b/2020               | Asia / India / Gujarat / Surat            | 2020-06-11      | Department of Microbiology, Government Medical College, Surat                                         | Gujarat Biotechnology Research Centre                                                                                               | Zama Patel, Monika Gandhi, Pinal Trivedi, Mahanshi Pandya, Nidhi Patel, Nalin Savaliya, Raghawendra Kumar, Dinesh Kumar, Zuber Sayyed, Komal Patel, Labdhi Pandya, Snehal Bagatharia, Naresh Chauhan, Summayya Mullan, Amit gamit, Pritesh Sabara, Apurvash Puvur, Arni Chaudhari, R D Dixit, A M Kadi, Harsh Bakshi, Chaitanya Joshi, Madhu Joshi                                                                                                                                                                                                                                                      |
| EPI_ISL_475032 | hCoV-19/India/GBRC206/2020                | Asia / India / Gujarat / Surat            | 2020-06-11      | Department of Microbiology, Government Medical College, Surat                                         | Gujarat Biotechnology Research Centre                                                                                               | Apurvash Puvur, Janvi Ravai, Zama Patel, Priyanka P Vatsa, R D Dixit, A M Kadi, Harsh Bakshi, Chaitanya Joshi, Madhu Joshi                                                                                                                                                                                                                                                                                                                                                                                                                                                                              |
| EPI_ISL_475033 | hCoV-19/India/GBRC207a/2020               | Asia / India / Gujarat / Surat            | 2020-06-11      | Department of Microbiology, Government Medical College, Surat                                         | Gujarat Biotechnology Research Centre                                                                                               | Pinal Trivedi, Mahanshi Pandya, Nidhi Patel, Nalin Savaliya, Raghawendra Kumar, Dinesh Kumar, Zuber Sayyed, Komal Patel, Labdhi Pandya, Snehal Bagatharia, Naresh Chauhan, Summayya Mullan, Amit gamit, Pritesh Sabara, Apurvash Puvur, Janvi Ravai, Zama Patel, Monika Gandhi, Pinal Trivedi, Mahanshi Pandya, Nidhi Patel, Nalin Savaliya, Raghawendra Kumar, Dinesh Kumar, Zuber Sayyed, Komal Patel, Labdhi Pandya, Snehal Bagatharia, Naresh Chauhan, Summayya Mullan, Amit gamit, Pritesh Sabara, Apurvash Puvur, Arni Chaudhari, R D Dixit, A M Kadi, Harsh Bakshi, Chaitanya Joshi, Madhu Joshi |
| EPI_ISL_475034 | hCoV-19/India/GBRC207b/2020               | Asia / India / Gujarat / Surat            | 2020-06-11      | Department of Microbiology, Government Medical College, Surat                                         | Gujarat Biotechnology Research Centre                                                                                               | Mahanshi Pandya, Nidhi Patel, Nalin Savaliya, Raghawendra Kumar, Dinesh Kumar, Zuber Sayyed, Komal Patel, Labdhi Pandya, Snehal Bagatharia, Naresh Chauhan, Summayya Mullan, Amit gamit, Pritesh Sabara, Apurvash Puvur, Janvi Ravai, Zama Patel, Monika Gandhi, Pinal Trivedi, Mahanshi Pandya, Nidhi Patel, Nalin Savaliya, Raghawendra Kumar, Dinesh Kumar, Zuber Sayyed, Komal Patel, Labdhi Pandya, Snehal Bagatharia, Naresh Chauhan, Summayya Mullan, Amit gamit, Pritesh Sabara, Apurvash Puvur, Arni Chaudhari, R D Dixit, A M Kadi, Harsh Bakshi, Chaitanya Joshi, Madhu Joshi                |
| EPI_ISL_475035 | hCoV-19/India/GBRC208a/2020               | Asia / India / Gujarat / Surat            | 2020-06-11      | Department of Microbiology, Government Medical College, Surat                                         | Gujarat Biotechnology Research Centre                                                                                               | Nidhi Patel, Nalin Savaliya, Raghawendra Kumar, Dinesh Kumar, Zuber Sayyed, Komal Patel, Labdhi Pandya, Snehal Bagatharia, Naresh Chauhan, Summayya Mullan, Amit gamit, Pritesh Sabara, Apurvash Puvur, Janvi Ravai, Zama Patel, Monika Gandhi, Pinal Trivedi, Mahanshi Pandya, Nidhi Patel, Nalin Savaliya, Raghawendra Kumar, Dinesh Kumar, Zuber Sayyed, Komal Patel, Labdhi Pandya, Snehal Bagatharia, Naresh Chauhan, Summayya Mullan, Amit gamit, Pritesh Sabara, Apurvash Puvur, Arni Chaudhari, R D Dixit, A M Kadi, Harsh Bakshi, Chaitanya Joshi, Madhu Joshi                                 |
| EPI_ISL_475036 | hCoV-19/India/GBRC208b/2020               | Asia / India / Gujarat / Surat            | 2020-06-11      | Department of Microbiology, Government Medical College, Surat                                         | Gujarat Biotechnology Research Centre                                                                                               | Nalin Savaliya, Raghawendra Kumar, Dinesh Kumar, Zuber Sayyed, Komal Patel, Labdhi Pandya, Snehal Bagatharia, Naresh Chauhan, Summayya Mullan, Amit gamit, Pritesh Sabara, Apurvash Puvur, Janvi Ravai, Zama Patel, Monika Gandhi, Pinal Trivedi, Mahanshi Pandya, Nidhi Patel, Nalin Savaliya, Raghawendra Kumar, Dinesh Kumar, Zuber Sayyed, Komal Patel, Labdhi Pandya, Snehal Bagatharia, Naresh Chauhan, Summayya Mullan, Amit gamit, Pritesh Sabara, Apurvash Puvur, Arni Chaudhari, R D Dixit, A M Kadi, Harsh Bakshi, Chaitanya Joshi, Madhu Joshi                                              |
| EPI_ISL_475037 | hCoV-19/India/GBRC209a/2020               | Asia / India / Gujarat / Surat            | 2020-06-11      | Department of Microbiology, Government Medical College, Surat                                         | Gujarat Biotechnology Research Centre                                                                                               | Raghawendra Kumar, Dinesh Kumar, Zuber Sayyed, Komal Patel, Labdhi Pandya, Snehal Bagatharia, Naresh Chauhan, Summayya Mullan, Amit gamit, Pritesh Sabara, Apurvash Puvur, Janvi Ravai, Zama Patel, Monika Gandhi, Pinal Trivedi, Mahanshi Pandya, Nidhi Patel, Nalin Savaliya, Raghawendra Kumar, Dinesh Kumar, Zuber Sayyed, Komal Patel, Labdhi Pandya, Snehal Bagatharia, Naresh Chauhan, Summayya Mullan, Amit gamit, Pritesh Sabara, Apurvash Puvur, Arni Chaudhari, R D Dixit, A M Kadi, Harsh Bakshi, Chaitanya Joshi, Madhu Joshi                                                              |
| EPI_ISL_475038 | hCoV-19/India/GBRC209b/2020               | Asia / India / Gujarat / Surat            | 2020-06-11      | Department of Microbiology, Government Medical College, Surat                                         | Gujarat Biotechnology Research Centre                                                                                               | Apurvash Puvur, Janvi Ravai, Zama Patel, Priyanka P Vatsa, R D Dixit, A M Kadi, Harsh Bakshi, Chaitanya Joshi, Madhu Joshi                                                                                                                                                                                                                                                                                                                                                                                                                                                                              |
| EPI_ISL_475039 | hCoV-19/India/GBRC210a/2020               | Asia / India / Gujarat / Surat            | 2020-06-11      | Department of Microbiology, Government Medical College, Surat                                         | Gujarat Biotechnology Research Centre                                                                                               | Komal Patel, Labdhi Pandya, Snehal Bagatharia, Naresh Chauhan, Summayya Mullan, Amit gamit, Pritesh Sabara, Apurvash Puvur, Janvi Ravai, Zama Patel, Monika Gandhi, Pinal Trivedi, Mahanshi Pandya, Nidhi Patel, Nalin Savaliya, Raghawendra Kumar, Dinesh Kumar, Zuber Sayyed, Komal Patel, Labdhi Pandya, Snehal Bagatharia, Naresh Chauhan, Summayya Mullan, Amit gamit, Pritesh Sabara, Apurvash Puvur, Arni Chaudhari, R D Dixit, A M Kadi, Harsh Bakshi, Chaitanya Joshi, Madhu Joshi                                                                                                             |
| EPI_ISL_475040 | hCoV-19/India/GBRC210b/2020               | Asia / India / Gujarat / Surat            | 2020-06-11      | Department of Microbiology, Government Medical College, Surat                                         | Gujarat Biotechnology Research Centre                                                                                               | Labdhi Pandya, Snehal Bagatharia, Naresh Chauhan, Summayya Mullan, Amit gamit, Pritesh Sabara, Apurvash Puvur, Janvi Ravai, Zama Patel, Monika Gandhi, Pinal Trivedi, Mahanshi Pandya, Nidhi Patel, Nalin Savaliya, Raghawendra Kumar, Dinesh Kumar, Zuber Sayyed, Komal Patel, Labdhi Pandya, Snehal Bagatharia, Naresh Chauhan, Summayya Mullan, Amit gamit, Pritesh Sabara, Apurvash Puvur, Arni Chaudhari, R D Dixit, A M Kadi, Harsh Bakshi, Chaitanya Joshi, Madhu Joshi                                                                                                                          |
| EPI_ISL_475041 | hCoV-19/India/GBRC211/2020                | Asia / India / Gujarat / Surat            | 2020-06-11      | Department of Microbiology, Government Medical College, Surat                                         | Gujarat Biotechnology Research Centre                                                                                               | Snehal Bagatharia, Naresh Chauhan, Summayya Mullan, Amit gamit, Pritesh Sabara, Apurvash Puvur, Janvi Ravai, Zama Patel, Monika Gandhi, Pinal Trivedi, Mahanshi Pandya, Nidhi Patel, Nalin Savaliya, Raghawendra Kumar, Dinesh Kumar, Zuber Sayyed, Komal Patel, Labdhi Pandya, Snehal Bagatharia, Naresh Chauhan, Summayya Mullan, Amit gamit, Pritesh Sabara, Apurvash Puvur, Arni Chaudhari, R D Dixit, A M Kadi, Harsh Bakshi, Chaitanya Joshi, Madhu Joshi                                                                                                                                         |
| EPI_ISL_475042 | hCoV-19/India/GBRC212/2020                | Asia / India / Gujarat / Surat            | 2020-06-11      | Department of Microbiology, Government Medical College, Surat                                         | Gujarat Biotechnology Research Centre                                                                                               | Snehal Bagatharia, Naresh Chauhan, Summayya Mullan, Amit gamit, Pritesh Sabara, Apurvash Puvur, Janvi Ravai, Zama Patel, Monika Gandhi, Pinal Trivedi, Mahanshi Pandya, Nidhi Patel, Nalin Savaliya, Raghawendra Kumar, Dinesh Kumar, Zuber Sayyed, Komal Patel, Labdhi Pandya, Snehal Bagatharia, Naresh Chauhan, Summayya Mullan, Amit gamit, Pritesh Sabara, Apurvash Puvur, Arni Chaudhari, R D Dixit, A M Kadi, Harsh Bakshi, Chaitanya Joshi, Madhu Joshi                                                                                                                                         |

[illegible]















[illegible]

[illegible]

Page PAGE]

|                |                                                                      |                                       |            |                                                                                                           |                                                                  |
|----------------|----------------------------------------------------------------------|---------------------------------------|------------|-----------------------------------------------------------------------------------------------------------|------------------------------------------------------------------|
| EPI_USL_444480 | hCoV-19/India/GBRCA/2020                                             | Asia / India / Gujarat / Ahmedabad    | 2020-04-30 | B.J. Medical College and Civil Hospital                                                                   | Gujarat Biotechnology Research Centre                            |
| EPI_USL_444481 | hCoV-19/India/GBRCSS/2020                                            | Asia / India / Gujarat / Ahmedabad    | 2020-04-30 | B.J. Medical College and Civil Hospital                                                                   | Gujarat Biotechnology Research Centre                            |
| EPI_USL_444482 | hCoV-19/India/GBRCS/12020                                            | Asia / India / Gujarat / Prantij      | 2020-05-02 | Gujarat Biotechnology Research Centre                                                                     | Gujarat Biotechnology Research Centre                            |
| EPI_USL_444483 | hCoV-19/India/GBRCS2/2020                                            | Asia / India / Gujarat / Prantij      | 2020-05-02 | Gujarat Biotechnology Research Centre                                                                     | Gujarat Biotechnology Research Centre                            |
| EPI_USL_444484 | hCoV-19/India/GBRCSS3/2020                                           | Asia / India / Gujarat / Modasa       | 2020-05-04 | Gujarat Biotechnology Research Centre                                                                     | Gujarat Biotechnology Research Centre                            |
| EPI_USL_444486 | hCoV-19/India/GBRCS5/2020                                            | Asia / India / Gujarat / Dhansura     | 2020-05-04 | Gujarat Biotechnology Research Centre                                                                     | Gujarat Biotechnology Research Centre                            |
| EPI_USL_444488 | hCoV-19/Sweden/KI-CMR-V300056977-11/2020/Europe / Sweden / Stockholm |                                       | 2020-03    | Karolinska Universitetlaboratoriet                                                                        | CTMR, Karolinska Institutet, Stockholm, Sweden                   |
| EPI_USL_444489 | hCoV-19/Sweden/KI-CMR-V300057201-8E/2020/Europe / Sweden / Stockholm |                                       | 2020-03    | Karolinska Universitetlaboratoriet                                                                        | CTMR, Karolinska Institutet, Stockholm, Sweden                   |
| EPI_USL_444490 | hCoV-19/Sweden/KI-CMR-V300037768-4D/2020/Europe / Sweden / Stockholm |                                       | 2020-03    | Karolinska Universitetlaboratoriet                                                                        | CTMR, Karolinska Institutet, Stockholm, Sweden                   |
| EPI_USL_444491 | hCoV-19/Swden/KI-CMR-V300037768-8A/2022/Europe / Sweden / Stockholm  |                                       | 2020-03    | Karolinska Universitetlaboratoriet                                                                        | CTMR, Karolinska Institutet, Stockholm, Sweden                   |
| EPI_USL_444492 | hCoV-19/Sweden/KI-CMR-V300056977-4A/2020/Europe / Sweden / Stockholm |                                       | 2020-03    | Karolinska Universitetlaboratoriet                                                                        | CTMR, Karolinska Institutet, Stockholm, Sweden                   |
| EPI_USL_444493 | hCoV-19/Uruguay-Mdeo-1/2020                                          | South America / Uruguay / Montevideo  | 2020-03-13 | Departamento de Laboratorios de Salud Publica (DLSP), Division Epidemiologia, Ministerio de Salud Publica |                                                                  |
| EPI_USL_445000 | hCoV-19/Guam/GUI_NHG_1/2020                                          | Oceania / Guam                        | 2020-03-20 | Naval Health Research Center                                                                              | Naval Medical Research Center Biological Development Directorate |
| EPI_USL_445078 | hCoV-19/USA/TX/TX_GCID_192000021/2020                                | North America / USA / Texas / Houston | 2020-03-20 | Baylor College of Medicine                                                                                | Baylor College of Medicine: HGSC                                 |
| EPI_USL_445079 | hCoV-19/USA/TX/TX_GCID_192000052/2020                                | North America / USA / Texas / Houston | 2020-03-23 | Baylor College of Medicine                                                                                | Baylor College of Medicine: HGSC                                 |
| EPI_USL_445080 | hCoV-19/USA/TX/TX_GCID_192000072/2020                                | North America / USA / Texas / Houston | 2020-03-21 | Baylor College of Medicine                                                                                | Baylor College of Medicine: HGSC                                 |
| EPI_USL_445081 | hCoV-19/USA/TX/TX_GCID_192000088/2020                                | North America / USA / Texas / Houston | 2020-03-23 | Baylor College of Medicine                                                                                | Baylor College of Medicine: HGSC                                 |
| EPI_USL_445082 | hCoV-19/USA/TX/TX_GCID_192000119/2020                                | North America / USA / Texas / Houston | 2020-03-24 | Baylor College of Medicine                                                                                | Baylor College of Medicine: HGSC                                 |
| EPI_USL_445083 | hCoV-19/USA/TX/TX_GCID_192000124/2020                                | North America / USA / Texas / Houston | 2020-03-24 | Baylor College of Medicine                                                                                | Baylor College of Medicine: HGSC                                 |
| EPI_USL_445084 | hCoV-19/USA/TX/TX_GCID_192000132/2020                                | North America / USA / Texas / Houston | 2020-03-25 | Baylor College of Medicine                                                                                | Baylor College of Medicine: HGSC                                 |
| EPI_USL_447301 | hCoV-19/Israel/19/100244/2020                                        | Asia / Israel / South Coast District  | 2020-03-24 | Microbiology Division, Barzilai University Medical Center                                                 | Stem Lab                                                         |
| EPI_USL_447302 | hCoV-19/Israel/19/100243/12020                                       | Asia / Israel / South Coast District  | 2020-03-24 | Microbiology Division, Barzilai University Medical Center                                                 | Stem Lab                                                         |
| EPI_USL_447303 | hCoV-19/Israel/19/100242/2020                                        | Asia / Israel / South Coast District  | 2020-03-24 | Microbiology Division, Barzilai University Medical Center                                                 | Stem Lab                                                         |
| EPI_USL_447304 | hCoV-19/Israel/19/100240/2020                                        | Asia / Israel / South Coast District  | 2020-03-23 | Microbiology Division, Barzilai University Medical Center                                                 | Stem Lab                                                         |
| EPI_USL_447305 | hCoV-19/Israel/19/100243/2020                                        | Asia / Israel / South Coast District  | 2020-03-23 | Microbiology Division, Barzilai University Medical Center                                                 | Stem Lab                                                         |
| EPI_USL_447307 | hCoV-19/Israel/19/100237/2020                                        | Asia / Israel / South Coast District  | 2020-03-22 | Microbiology Division, Barzilai University Medical Center                                                 | Stem Lab                                                         |
| EPI_USL_447308 | hCoV-19/Israel/19/100231/2020                                        | Asia / Israel / South Coast District  | 2020-03-21 | Microbiology Division, Barzilai University Medical Center                                                 | Stem Lab                                                         |
| EPI_USL_447309 | hCoV-19/Israel/19/100231/2020                                        | Asia / Israel / South Coast District  | 2020-03-21 | Microbiology Division, Barzilai University Medical Center                                                 | Stem Lab                                                         |
| EPI_USL_447310 | hCoV-19/Israel/19/100231/2020                                        | Asia / Israel / South Coast District  | 2020-03-21 | Microbiology Division, Barzilai University Medical Center                                                 | Stem Lab                                                         |
| EPI_USL_447354 | hCoV-19/India/GBRCRT/6/2020                                          | Asia / India / Gujarat / Modasa       | 2020-05-05 | Gujarat Biotechnology Research Centre                                                                     | Gujarat Biotechnology Research Centre                            |
| EPI_USL_447355 | hCoV-19/India/GBRCRT/7/2020                                          | Asia / India / Gujarat / Modasa       | 2020-05-05 | Gujarat Biotechnology Research Centre                                                                     | Gujarat Biotechnology Research Centre                            |
| EPI_USL_447356 | hCoV-19/India/GBRCRT/8a/2020                                         | Asia / India / Gujarat / Modasa       | 2020-05-05 | Gujarat Biotechnology Research Centre                                                                     | Gujarat Biotechnology Research Centre                            |
| EPI_USL_447357 | hCoV-19/India/GBRCRT/8b/2020                                         | Asia / India / Gujarat / Modasa       | 2020-05-05 | Gujarat Biotechnology Research Centre                                                                     | Gujarat Biotechnology Research Centre                            |
| EPI_USL_447542 | hCoV-19/India/GBRCR2a/2020                                           | Asia / India / Gujarat / Modasa       | 2020-05-05 | Gujarat Biotechnology Research Centre                                                                     | Gujarat Biotechnology Research Centre                            |
| EPI_USL_447543 | hCoV-19/India/GBRCR2b/2020                                           | Asia / India / Gujarat / Modasa       | 2020-05-05 | Gujarat Biotechnology Research Centre                                                                     | Gujarat Biotechnology Research Centre                            |
| EPI_USL_447544 | hCoV-19/India/GBRCR3/2020                                            | Asia / India / Gujarat / Modasa       | 2020-05-05 | Gujarat Biotechnology Research Centre                                                                     | Gujarat Biotechnology Research Centre                            |
| EPI_USL_447545 | hCoV-19/India/GBRCR4a/2020                                           | Asia / India / Gujarat / Prantij      | 2020-05-05 | Gujarat Biotechnology Research Centre                                                                     | Gujarat Biotechnology Research Centre                            |
| EPI_USL_447546 | hCoV-19/India/GBRCR8/2020                                            | Asia / India / Gujarat / Himmatnagar  | 2020-05-05 | Gujarat Biotechnology Research Centre                                                                     | Gujarat Biotechnology Research Centre                            |
| EPI_USL_447548 | hCoV-19/India/GBRCRT/7/2020                                          | Asia / India / Gujarat / Dahgam       | 2020-04-28 | GMERS Medical College and Hospital, Gandhinagar                                                           | Gujarat Biotechnology Research Centre                            |
| EPI_USL_447551 | hCoV-19/India/GBRCR9/2020                                            | Asia / India / Gujarat / Gandhinagar  | 2020-04-25 | GMERS Medical College and Hospital, Gandhinagar                                                           | Gujarat Biotechnology Research Centre                            |

|                |                                   |                                      |            |                                                                        |                                                         |                                                                                                                                                                                                                                                                                                                                                                                                                                                                                                                                                                                                                                                                                                                                                                                                                                                    |
|----------------|-----------------------------------|--------------------------------------|------------|------------------------------------------------------------------------|---------------------------------------------------------|----------------------------------------------------------------------------------------------------------------------------------------------------------------------------------------------------------------------------------------------------------------------------------------------------------------------------------------------------------------------------------------------------------------------------------------------------------------------------------------------------------------------------------------------------------------------------------------------------------------------------------------------------------------------------------------------------------------------------------------------------------------------------------------------------------------------------------------------------|
| EPI_ISL_447582 | hCoV-19/India/GBRC90/2020         | Asia / India / Gujarat / Gandhinagar | 2020-05-02 | GMERS Medical College and Hospital, Gandhinagar                        | Gujarat Biotechnology Research Centre                   | Raghavendra Kumar, Dinesh Kumar, Zuber Sayed, Dipa Kinarwala, Disha Patel, Binita Aring, Neeta Khandewal, Geeta Vaghela, Sonia Barve, Bhavesh Modi, Kairavi Joshi, Gaurishankar Shrimali, Nidhi Sood, Pranay Shah, R D Dixit, Snehal Bagatharia, Kamlesh J Upadhyay, Ramesh Pandit, Tejas Shah, Anil Hiru, Pritesh Sabara, Apurvasini Puvur, Jamil Ravul, Monika Gandhi, Pinal Trivedi, Mahesh Pandya, Amit Kanani, Akanksha Verma, Nalin Savaliya, Raghuwendra Kumar, Dipeshwari Shewale, Chaitanya Joshi, Madhvi Joshi                                                                                                                                                                                                                                                                                                                           |
| EPI_ISL_447583 | hCoV-19/India/GBRC91/2020         | Asia / India / Gujarat / Gandhinagar | 2020-04-27 | GMERS Medical College and Hospital, Gandhinagar                        | Gujarat Biotechnology Research Centre                   | Zuber Sayed, Dipa Kinarwala, Disha Patel, Binita Aring, Neeta Khandewal, Geeta Vaghela, Sonia Barve, Bhavesh Modi, Kairavi Joshi, Gaurishankar Shrimali, Nidhi Sood, Pranay Shah, R D Dixit, Snehal Bagatharia, Kamlesh J Upadhyay, Ramesh Pandit, Tejas Shah, Anil Hiru, Pritesh Sabara, Apurvasini Puvur, Jamil Ravul, Monika Gandhi, Pinal Trivedi, Mahesh Pandya, Amit Kanani, Akanksha Verma, Nalin Savaliya, Raghuwendra Kumar, Dipeshwari Shewale, Chaitanya Joshi, Madhvi Joshi                                                                                                                                                                                                                                                                                                                                                            |
| EPI_ISL_447584 | hCoV-19/India/GBRC92/2020         | Asia / India / Gujarat / Gandhinagar | 2020-04-26 | GMERS Medical College and Hospital, Gandhinagar                        | Gujarat Biotechnology Research Centre                   | Dipa Kinarwala, Disha Patel, Binita Aring, Neeta Khandewal, Geeta Vaghela, Sonia Barve, Bhavesh Modi, Kairavi Joshi, Gaurishankar Shrimali, Nidhi Sood, Pranay Shah, R D Dixit, Snehal Bagatharia, Kamlesh J Upadhyay, Ramesh Pandit, Tejas Shah, Anil Hiru, Pritesh Sabara, Apurvasini Puvur, Jamil Ravul, Monika Gandhi, Pinal Trivedi, Mahesh Pandya, Amit Kanani, Akanksha Verma, Nalin Savaliya, Raghuwendra Kumar, Dinesh Kumar, Sharmista Majumdar, Chaitanya Joshi, Madhvi Joshi                                                                                                                                                                                                                                                                                                                                                           |
| EPI_ISL_447585 | hCoV-19/India/GBRC93/2020         | Asia / India / Gujarat / Mansa       | 2020-04-28 | GMERS Medical College and Hospital, Gandhinagar                        | Gujarat Biotechnology Research Centre                   | Dipa Kinarwala, Disha Patel, Binita Aring, Neeta Khandewal, Geeta Vaghela, Sonia Barve, Bhavesh Modi, Kairavi Joshi, Gaurishankar Shrimali, Nidhi Sood, Pranay Shah, R D Dixit, Snehal Bagatharia, Kamlesh J Upadhyay, Ramesh Pandit, Tejas Shah, Anil Hiru, Pritesh Sabara, Apurvasini Puvur, Jamil Ravul, Monika Gandhi, Pinal Trivedi, Mahesh Pandya, Amit Kanani, Akanksha Verma, Nalin Savaliya, Raghuwendra Kumar, Dipeshwari Shewale, Chaitanya Joshi, Madhvi Joshi                                                                                                                                                                                                                                                                                                                                                                         |
| EPI_ISL_447577 | hCoV-19/India/COMB_3321/2020      | Asia / India / Telangana             | 2020-04-02 | CSIR-Centre for Cellular and Molecular Biology                         | CSIR-Centre for Cellular and Molecular Biology          | Cheng-Lih Peng, Ming-Jir JIAN, Chih-Kai Chang, Jung-Chung Lin, Kuo-Ming Yeh, Chien-Wen Chen, Sheng-Kang Chiu, Hsing-Yi Chung, Shih-Hung Tsai, Kuo-Sheng Hung, Tien-Yao Chang, Feng-Yee Chang, Hung-Sheng Shang                                                                                                                                                                                                                                                                                                                                                                                                                                                                                                                                                                                                                                     |
| EPI_ISL_447591 | hCoV-19/Taiwan/TSGH-32/2020       | Asia / Taiwan / Taipei               | 2020-03-20 | TSGH-CP molecular lab                                                  | TSGH-CP molecular lab                                   | Cheng-Lih Peng, Ming-Jir JIAN, Chih-Kai Chang, Jung-Chung Lin, Kuo-Ming Yeh, Chien-Wen Chen, Sheng-Kang Chiu, Hsing-Yi Chung, Shih-Hung Tsai, Kuo-Sheng Hung, Tien-Yao Chang, Feng-Yee Chang, Hung-Sheng Shang                                                                                                                                                                                                                                                                                                                                                                                                                                                                                                                                                                                                                                     |
| EPI_ISL_447592 | hCoV-19/Taiwan/TSGH-33/2020       | Asia / Taiwan / New Taipei City      | 2020-03-29 | TSGH-CP molecular lab                                                  | TSGH-CP molecular lab                                   | Cheng-Lih Peng, Ming-Jir JIAN, Chih-Kai Chang, Jung-Chung Lin, Kuo-Ming Yeh, Chien-Wen Chen, Sheng-Kang Chiu, Hsing-Yi Chung, Shih-Hung Tsai, Kuo-Sheng Hung, Tien-Yao Chang, Feng-Yee Chang, Hung-Sheng Shang                                                                                                                                                                                                                                                                                                                                                                                                                                                                                                                                                                                                                                     |
| EPI_ISL_447593 | hCoV-19/Taiwan/TSGH-34/2020       | Asia / Taiwan / New Taipei City      | 2020-04-01 | TSGH-CP molecular lab                                                  | TSGH-CP molecular lab                                   | Cheng-Lih Peng, Ming-Jir JIAN, Chih-Kai Chang, Jung-Chung Lin, Kuo-Ming Yeh, Chien-Wen Chen, Sheng-Kang Chiu, Hsing-Yi Chung, Shih-Hung Tsai, Kuo-Sheng Hung, Tien-Yao Chang, Feng-Yee Chang, Hung-Sheng Shang                                                                                                                                                                                                                                                                                                                                                                                                                                                                                                                                                                                                                                     |
| EPI_ISL_447614 | hCoV-19/Taiwan/NTU10/2020         | Asia / Taiwan / Taipei               | 2020-03-15 | Department of Laboratory Medicine, National Taiwan University Hospital | Microbial Genomics Core Lab, National Taiwan University | Shou-Hwei Yeh, You-Yu Lin, Ya-Yun Lai, Chiao-Ling Li, Shan-Chwen Chang, Pei-Jer Chen, Su-Yuan Chang                                                                                                                                                                                                                                                                                                                                                                                                                                                                                                                                                                                                                                                                                                                                                |
| EPI_ISL_447615 | hCoV-19/Taiwan/NTU18/2020         | Asia / Taiwan / Taipei               | 2020-03-19 | Department of Laboratory Medicine, National Taiwan University Hospital | Microbial Genomics Core Lab, National Taiwan University | Shou-Hwei Yeh, You-Yu Lin, Ya-Yun Lai, Chiao-Ling Li, Shan-Chwen Chang, Pei-Jer Chen, Su-Yuan Chang                                                                                                                                                                                                                                                                                                                                                                                                                                                                                                                                                                                                                                                                                                                                                |
| EPI_ISL_447616 | hCoV-19/Taiwan/NTU22/2020         | Asia / Taiwan / Taipei               | 2020-03-21 | Department of Laboratory Medicine, National Taiwan University Hospital | Microbial Genomics Core Lab, National Taiwan University | Shou-Hwei Yeh, You-Yu Lin, Ya-Yun Lai, Chiao-Ling Li, Shan-Chwen Chang, Pei-Jer Chen, Su-Yuan Chang                                                                                                                                                                                                                                                                                                                                                                                                                                                                                                                                                                                                                                                                                                                                                |
| EPI_ISL_447617 | hCoV-19/Taiwan/NTU23/2020         | Asia / Taiwan / Taipei               | 2020-03-25 | Department of Laboratory Medicine, National Taiwan University Hospital | Microbial Genomics Core Lab, National Taiwan University | Shou-Hwei Yeh, You-Yu Lin, Ya-Yun Lai, Chiao-Ling Li, Shan-Chwen Chang, Pei-Jer Chen, Su-Yuan Chang                                                                                                                                                                                                                                                                                                                                                                                                                                                                                                                                                                                                                                                                                                                                                |
| EPI_ISL_447618 | hCoV-19/Taiwan/NTU24/2020         | Asia / Taiwan / Taipei               | 2020-03-25 | Department of Laboratory Medicine, National Taiwan University Hospital | Microbial Genomics Core Lab, National Taiwan University | Shou-Hwei Yeh, You-Yu Lin, Ya-Yun Lai, Chiao-Ling Li, Shan-Chwen Chang, Pei-Jer Chen, Su-Yuan Chang                                                                                                                                                                                                                                                                                                                                                                                                                                                                                                                                                                                                                                                                                                                                                |
| EPI_ISL_447619 | hCoV-19/Taiwan/NTU25/2020         | Asia / Taiwan / Taipei               | 2020-03-26 | Department of Laboratory Medicine, National Taiwan University Hospital | Microbial Genomics Core Lab, National Taiwan University | Shou-Hwei Yeh, You-Yu Lin, Ya-Yun Lai, Chiao-Ling Li, Shan-Chwen Chang, Pei-Jer Chen, Su-Yuan Chang                                                                                                                                                                                                                                                                                                                                                                                                                                                                                                                                                                                                                                                                                                                                                |
| EPI_ISL_447620 | hCoV-19/Taiwan/NTU26/2020         | Asia / Taiwan / Taipei               | 2020-03-30 | Department of Laboratory Medicine, National Taiwan University Hospital | Microbial Genomics Core Lab, National Taiwan University | Shou-Hwei Yeh, You-Yu Lin, Ya-Yun Lai, Chiao-Ling Li, Shan-Chwen Chang, Pei-Jer Chen, Su-Yuan Chang                                                                                                                                                                                                                                                                                                                                                                                                                                                                                                                                                                                                                                                                                                                                                |
| EPI_ISL_447621 | hCoV-19/Taiwan/NTU27/2020         | Asia / Taiwan / Taipei               | 2020-04-13 | Department of Laboratory Medicine, National Taiwan University Hospital | Microbial Genomics Core Lab, National Taiwan University | Shou-Hwei Yeh, You-Yu Lin, Ya-Yun Lai, Chiao-Ling Li, Shan-Chwen Chang, Pei-Jer Chen, Su-Yuan Chang                                                                                                                                                                                                                                                                                                                                                                                                                                                                                                                                                                                                                                                                                                                                                |
| EPI_ISL_447622 | hCoV-19/India/Lanka3865/2020      | Asia / Sri Lanka                     | 2020-04-27 | National Influenza centre, Sri Lanka                                   | The University of Hong Kong                             | Jude Jayarama, Daniel KW Chu, Malik Peris                                                                                                                                                                                                                                                                                                                                                                                                                                                                                                                                                                                                                                                                                                                                                                                                          |
| EPI_ISL_450171 | hCoV-19/India/Lanka3868/2020      | Asia / Sri Lanka                     | 2020-02-08 | National Influenza centre, Sri Lanka                                   | The University of Hong Kong                             | Jude Jayarama, Daniel KW Chu, Malik Peris                                                                                                                                                                                                                                                                                                                                                                                                                                                                                                                                                                                                                                                                                                                                                                                                          |
| EPI_ISL_450321 | hCoV-19/India/COMB_NIV1/2020      | Asia / India / Maharashtra           | 2020-04-04 | NIV Pune                                                               | CSIR-Centre for Cellular and Molecular Biology          | Dr V A Poldar, Dr M L Choudhary, Dr Priya Abraham, V Vipul, S. Jadhav, U. Saha, H. Kengle, A. Awhale, A. Jagtap, A. Gondhalkar, V. Malik, N. Srivastava, S. Digraikar, P. Malasane, S. Hundekar, K. Patel, Yogesh Balakantik, M. Kalade, S. Jadhav, R. Gunjkar, V. Awale, S. Bhorekar, P. Shinde, S. Salve, B. Mirhas, S. Bhargwad, H. Kaushtal V. Gurur, S. Tomar, Payel Mukherjee, Sofia Banu, Priya Singh, Diviya Vedagiri, Divya Gupta, Vahid Sah, Santosh Kumar Kuncha, Krishnan Harinivas Harshan, Archana Bhargwad Siva, Karthik Bhargwad Talpaka, Shaqufa Khan, Lamuk Zaveri, Namami Gaur, Sakshi Shambhavi, Tulasi Nagaband, Purushotham Vodrala, G. Aditya Kumar, Koushik Sivalakumar, Pooja Ramesh Gupta, Rajan Kumar Jha, Shraddha Vijay Lahoti, Deepak Kumar, Devi Prasad Vijayashankara, Disha Nanda, Divya Das, Jotin Gogoi, Manish |
| EPI_ISL_450322 | hCoV-19/India/COMB_NIV2/2020      | Asia / India / Maharashtra           | 2020-04-04 | NIV Pune                                                               | CSIR-Centre for Cellular and Molecular Biology          | Dr V A Poldar, Dr M L Choudhary, Dr Priya Abraham, V Vipul, S. Jadhav, U. Saha, H. Kengle, A. Awhale, A. Jagtap, A. Gondhalkar, V. Malik, N. Srivastava, S. Digraikar, P. Malasane, S. Hundekar, K. Patel, Yogesh Balakantik, M. Kalade, S. Jadhav, R. Gunjkar, V. Awale, S. Bhorekar, P. Shinde, S. Salve, B. Mirhas, S. Bhargwad, H. Kaushtal V. Gurur, S. Tomar, Payel Mukherjee, Sofia Banu, Priya Singh, Diviya Vedagiri, Divya Gupta, Vahid Sah, Santosh Kumar Kuncha, Krishnan Harinivas Harshan, Archana Bhargwad Siva, Karthik Bhargwad Talpaka, Shaqufa Khan, Lamuk Zaveri, Namami Gaur, Sakshi Shambhavi, Tulasi Nagaband, Purushotham Vodrala, G. Aditya Kumar, Koushik Sivalakumar, Pooja Ramesh Gupta, Rajan Kumar Jha, Shraddha Vijay Lahoti, Deepak Kumar, Devi Prasad Vijayashankara, Disha Nanda, Divya Das, Jotin Gogoi, Manish |
| EPI_ISL_450323 | hCoV-19/India/COMB_NIV3/2020      | Asia / India / Maharashtra           | 2020-03-27 | NIV Pune                                                               | CSIR-Centre for Cellular and Molecular Biology          | Dr V A Poldar, Dr M L Choudhary, Dr Priya Abraham, V Vipul, S. Jadhav, U. Saha, H. Kengle, A. Awhale, A. Jagtap, A. Gondhalkar, V. Malik, N. Srivastava, S. Digraikar, P. Malasane, S. Hundekar, K. Patel, Yogesh Balakantik, M. Kalade, S. Jadhav, R. Gunjkar, V. Awale, S. Bhorekar, P. Shinde, S. Salve, B. Mirhas, S. Bhargwad, H. Kaushtal V. Gurur, S. Tomar, Payel Mukherjee, Sofia Banu, Priya Singh, Diviya Vedagiri, Divya Gupta, Vahid Sah, Santosh Kumar Kuncha, Krishnan Harinivas Harshan, Archana Bhargwad Siva, Karthik Bhargwad Talpaka, Shaqufa Khan, Lamuk Zaveri, Namami Gaur, Sakshi Shambhavi, Tulasi Nagaband, Purushotham Vodrala, G. Aditya Kumar, Koushik Sivalakumar, Pooja Ramesh Gupta, Rajan Kumar Jha, Shraddha Vijay Lahoti, Deepak Kumar, Devi Prasad Vijayashankara, Disha Nanda, Divya Das, Jotin Gogoi, Manish |
| EPI_ISL_450324 | hCoV-19/India/COMB_NIV4/2020      | Asia / India / Maharashtra           | 2020-03-26 | NIV Pune                                                               | CSIR-Centre for Cellular and Molecular Biology          | Dr V A Poldar, Dr M L Choudhary, Dr Priya Abraham, V Vipul, S. Jadhav, U. Saha, H. Kengle, A. Awhale, A. Jagtap, A. Gondhalkar, V. Malik, N. Srivastava, S. Digraikar, P. Malasane, S. Hundekar, K. Patel, Yogesh Balakantik, M. Kalade, S. Jadhav, R. Gunjkar, V. Awale, S. Bhorekar, P. Shinde, S. Salve, B. Mirhas, S. Bhargwad, H. Kaushtal V. Gurur, S. Tomar, Payel Mukherjee, Sofia Banu, Priya Singh, Diviya Vedagiri, Divya Gupta, Vahid Sah, Santosh Kumar Kuncha, Krishnan Harinivas Harshan, Archana Bhargwad Siva, Karthik Bhargwad Talpaka, Shaqufa Khan, Lamuk Zaveri, Namami Gaur, Sakshi Shambhavi, Tulasi Nagaband, Purushotham Vodrala, G. Aditya Kumar, Koushik Sivalakumar, Pooja Ramesh Gupta, Rajan Kumar Jha, Shraddha Vijay Lahoti, Deepak Kumar, Devi Prasad Vijayashankara, Disha Nanda, Divya Das, Jotin Gogoi, Manish |
| EPI_ISL_450325 | hCoV-19/India/COMB_NIV5/2020      | Asia / India / Maharashtra           | 2020-03-17 | NIV Pune                                                               | CSIR-Centre for Cellular and Molecular Biology          | Dr V A Poldar, Dr M L Choudhary, Dr Priya Abraham, V Vipul, S. Jadhav, U. Saha, H. Kengle, A. Awhale, A. Jagtap, A. Gondhalkar, V. Malik, N. Srivastava, S. Digraikar, P. Malasane, S. Hundekar, K. Patel, Yogesh Balakantik, M. Kalade, S. Jadhav, R. Gunjkar, V. Awale, S. Bhorekar, P. Shinde, S. Salve, B. Mirhas, S. Bhargwad, H. Kaushtal V. Gurur, S. Tomar, Payel Mukherjee, Sofia Banu, Priya Singh, Diviya Vedagiri, Divya Gupta, Vahid Sah, Santosh Kumar Kuncha, Krishnan Harinivas Harshan, Archana Bhargwad Siva, Karthik Bhargwad Talpaka, Shaqufa Khan, Lamuk Zaveri, Namami Gaur, Sakshi Shambhavi, Tulasi Nagaband, Purushotham Vodrala, G. Aditya Kumar, Koushik Sivalakumar, Pooja Ramesh Gupta, Rajan Kumar Jha, Shraddha Vijay Lahoti, Deepak Kumar, Devi Prasad Vijayashankara, Disha Nanda, Divya Das, Jotin Gogoi, Manish |
| EPI_ISL_450326 | hCoV-19/India/COMB_J125/2020      | Asia / India / Telangana             | 2020-04-01 | CSIR-Centre for Cellular and Molecular Biology                         | CSIR-Centre for Cellular and Molecular Biology          | Cheng-Lih Peng, Ming-Jir JIAN, Chih-Kai Chang, Jung-Chung Lin, Kuo-Ming Yeh, Chien-Wen Chen, Sheng-Kang Chiu, Hsing-Yi Chung, Shih-Hung Tsai, Kuo-Sheng Hung, Tien-Yao Chang, Feng-Yee Chang, Hung-Sheng Shang                                                                                                                                                                                                                                                                                                                                                                                                                                                                                                                                                                                                                                     |
| EPI_ISL_450327 | hCoV-19/India/COMB_J199/2020      | Asia / India / Telangana             | 2020-04-01 | CSIR-Centre for Cellular and Molecular Biology                         | CSIR-Centre for Cellular and Molecular Biology          | Cheng-Lih Peng, Ming-Jir JIAN, Chih-Kai Chang, Jung-Chung Lin, Kuo-Ming Yeh, Chien-Wen Chen, Sheng-Kang Chiu, Hsing-Yi Chung, Shih-Hung Tsai, Kuo-Sheng Hung, Tien-Yao Chang, Feng-Yee Chang, Hung-Sheng Shang                                                                                                                                                                                                                                                                                                                                                                                                                                                                                                                                                                                                                                     |
| EPI_ISL_450330 | hCoV-19/India/COMB_J375/2020      | Asia / India / Telangana             | 2020-04-02 | CSIR-Centre for Cellular and Molecular Biology                         | CSIR-Centre for Cellular and Molecular Biology          | Cheng-Lih Peng, Ming-Jir JIAN, Chih-Kai Chang, Jung-Chung Lin, Kuo-Ming Yeh, Chien-Wen Chen, Sheng-Kang Chiu, Hsing-Yi Chung, Shih-Hung Tsai, Kuo-Sheng Hung, Tien-Yao Chang, Feng-Yee Chang, Hung-Sheng Shang                                                                                                                                                                                                                                                                                                                                                                                                                                                                                                                                                                                                                                     |
| EPI_ISL_451644 | hCoV-19/Poland/Pom20/2020         | Europe / Poland / Pomorze            | 2020-05-02 | Laboratory of Molecular Biology, Diagnostyka sp. z o.o.                | Laboratory of Recombinant Vaccines                      | Lukasz Rabalski, Anna Piotrowska-Mietelska, Maciej Kosinski, Boguslaw Szwedczyk, Krystyna Bienkowska-Szwedczyk                                                                                                                                                                                                                                                                                                                                                                                                                                                                                                                                                                                                                                                                                                                                     |
| EPI_ISL_451645 | hCoV-19/Poland/Pom20/2020         | Europe / Poland / Pomorze            | 2020-05-02 | Laboratory of Molecular Biology, Diagnostyka sp. z o.o.                | Laboratory of Recombinant Vaccines                      | Lukasz Rabalski, Anna Piotrowska-Mietelska, Maciej Kosinski, Boguslaw Szwedczyk, Krystyna Bienkowska-Szwedczyk                                                                                                                                                                                                                                                                                                                                                                                                                                                                                                                                                                                                                                                                                                                                     |
| EPI_ISL_451646 | hCoV-19/Poland/Pom20/2020         | Europe / Poland / Pomorze            | 2020-04-22 | Laboratory of Molecular Biology, Diagnostyka sp. z o.o.                | Laboratory of Recombinant Vaccines                      | Lukasz Rabalski, Anna Piotrowska-Mietelska, Maciej Kosinski, Boguslaw Szwedczyk, Krystyna Bienkowska-Szwedczyk                                                                                                                                                                                                                                                                                                                                                                                                                                                                                                                                                                                                                                                                                                                                     |
| EPI_ISL_451647 | hCoV-19/Poland/Pom20/2020         | Europe / Poland / Pomorze            | 2020-04-23 | Laboratory of Molecular Biology, Diagnostyka sp. z o.o.                | Laboratory of Recombinant Vaccines                      | Lukasz Rabalski, Anna Piotrowska-Mietelska, Maciej Kosinski, Boguslaw Szwedczyk, Krystyna Bienkowska-Szwedczyk                                                                                                                                                                                                                                                                                                                                                                                                                                                                                                                                                                                                                                                                                                                                     |
| EPI_ISL_451655 | hCoV-19/Poland/Sla20/2020         | Europe / Poland / Slask              | 2020-05-05 | State Sanitary Inspectorate                                            | Laboratory of Recombinant Vaccines                      | Lukasz Rabalski, Boguslaw Szwedczyk, Krystyna Bienkowska-Szwedczyk, Jarostaw Prikas                                                                                                                                                                                                                                                                                                                                                                                                                                                                                                                                                                                                                                                                                                                                                                |
| EPI_ISL_451656 | hCoV-19/Poland/Sla20/2020         | Europe / Poland / Slask              | 2020-05-05 | State Sanitary Inspectorate                                            | Laboratory of Recombinant Vaccines                      | Lukasz Rabalski, Boguslaw Szwedczyk, Krystyna Bienkowska-Szwedczyk, Jarostaw Prikas                                                                                                                                                                                                                                                                                                                                                                                                                                                                                                                                                                                                                                                                                                                                                                |
| EPI_ISL_451657 | hCoV-19/Poland/Sla30/2020         | Europe / Poland / Slask              | 2020-05-05 | State Sanitary Inspectorate                                            | Laboratory of Recombinant Vaccines                      | Lukasz Rabalski, Boguslaw Szwedczyk, Krystyna Bienkowska-Szwedczyk, Jarostaw Prikas                                                                                                                                                                                                                                                                                                                                                                                                                                                                                                                                                                                                                                                                                                                                                                |
| EPI_ISL_451658 | hCoV-19/Poland/Sla40/2020         | Europe / Poland / Slask              | 2020-05-05 | State Sanitary Inspectorate                                            | Laboratory of Recombinant Vaccines                      | Lukasz Rabalski, Boguslaw Szwedczyk, Krystyna Bienkowska-Szwedczyk, Jarostaw Prikas                                                                                                                                                                                                                                                                                                                                                                                                                                                                                                                                                                                                                                                                                                                                                                |
| EPI_ISL_451659 | hCoV-19/Poland/Sla50/2020         | Europe / Poland / Slask              | 2020-05-05 | State Sanitary Inspectorate                                            | Laboratory of Recombinant Vaccines                      | Lukasz Rabalski, Boguslaw Szwedczyk, Krystyna Bienkowska-Szwedczyk, Jarostaw Prikas                                                                                                                                                                                                                                                                                                                                                                                                                                                                                                                                                                                                                                                                                                                                                                |
| EPI_ISL_451660 | hCoV-19/Poland/Sla60/2020         | Europe / Poland / Slask              | 2020-05-05 | State Sanitary Inspectorate                                            | Laboratory of Recombinant Vaccines                      | Lukasz Rabalski, Boguslaw Szwedczyk, Krystyna Bienkowska-Szwedczyk, Jarostaw Prikas                                                                                                                                                                                                                                                                                                                                                                                                                                                                                                                                                                                                                                                                                                                                                                |
| EPI_ISL_451661 | hCoV-19/Poland/Sla70/2020         | Europe / Poland / Slask              | 2020-05-05 | State Sanitary Inspectorate                                            | Laboratory of Recombinant Vaccines                      | Lukasz Rabalski, Boguslaw Szwedczyk, Krystyna Bienkowska-Szwedczyk, Jarostaw Prikas                                                                                                                                                                                                                                                                                                                                                                                                                                                                                                                                                                                                                                                                                                                                                                |
| EPI_ISL_452200 | hCoV-19/India/NIV-12024/2020      | Asia / India / Maharashtra           | 2020-04-20 | NIV Influenza                                                          | NIV Influenza                                           | Lukasz Rabalski, Anna Piotrowska-Mietelska, Maciej Kosinski, Boguslaw Szwedczyk, Krystyna Bienkowska-Szwedczyk                                                                                                                                                                                                                                                                                                                                                                                                                                                                                                                                                                                                                                                                                                                                     |
| EPI_ISL_452201 | hCoV-19/India/NIV-12067/2020      | Asia / India / Maharashtra           | 2020-04-20 | NIV Influenza                                                          | NIV Influenza                                           | Lukasz Rabalski, Anna Piotrowska-Mietelska, Maciej Kosinski, Boguslaw Szwedczyk, Krystyna Bienkowska-Szwedczyk                                                                                                                                                                                                                                                                                                                                                                                                                                                                                                                                                                                                                                                                                                                                     |
| EPI_ISL_452202 | hCoV-19/India/NIV-28102/2020      | Asia / India / Maharashtra           | 2020-03-16 | NIV Influenza                                                          | NIV Influenza                                           | Lukasz Rabalski, Anna Piotrowska-Mietelska, Maciej Kosinski, Boguslaw Szwedczyk, Krystyna Bienkowska-Szwedczyk                                                                                                                                                                                                                                                                                                                                                                                                                                                                                                                                                                                                                                                                                                                                     |
| EPI_ISL_452203 | hCoV-19/India/NIV-4367/2020       | Asia / India / Maharashtra           | 2020-03-22 | NIV Influenza                                                          | NIV Influenza                                           | Lukasz Rabalski, Anna Piotrowska-Mietelska, Maciej Kosinski, Boguslaw Szwedczyk, Krystyna Bienkowska-Szwedczyk                                                                                                                                                                                                                                                                                                                                                                                                                                                                                                                                                                                                                                                                                                                                     |
| EPI_ISL_452204 | hCoV-19/India/NIV-5109/2020       | Asia / India / Maharashtra           | 2020-03-26 | NIV Influenza                                                          | NIV Influenza                                           | Lukasz Rabalski, Anna Piotrowska-Mietelska, Maciej Kosinski, Boguslaw Szwedczyk, Krystyna Bienkowska-Szwedczyk                                                                                                                                                                                                                                                                                                                                                                                                                                                                                                                                                                                                                                                                                                                                     |
| EPI_ISL_452205 | hCoV-19/India/NIV-5119/2020       | Asia / India / Maharashtra           | 2020-03-26 | NIV Influenza                                                          | NIV Influenza                                           | Lukasz Rabalski, Anna Piotrowska-Mietelska, Maciej Kosinski, Boguslaw Szwedczyk, Krystyna Bienkowska-Szwedczyk                                                                                                                                                                                                                                                                                                                                                                                                                                                                                                                                                                                                                                                                                                                                     |
| EPI_ISL_452206 | hCoV-19/India/NIV-6311/2020       | Asia / India / Maharashtra           | 2020-03-30 | NIV Influenza                                                          | NIV Influenza                                           | Lukasz Rabalski, Anna Piotrowska-Mietelska, Maciej Kosinski, Boguslaw Szwedczyk, Krystyna Bienkowska-Szwedczyk                                                                                                                                                                                                                                                                                                                                                                                                                                                                                                                                                                                                                                                                                                                                     |
| EPI_ISL_452207 | hCoV-19/India/NIV-74392/2020      | Asia / India / Maharashtra           | 2020-04-05 | NIV Influenza                                                          | NIV Influenza                                           | Lukasz Rabalski, Anna Piotrowska-Mietelska, Maciej Kosinski, Boguslaw Szwedczyk, Krystyna Bienkowska-Szwedczyk                                                                                                                                                                                                                                                                                                                                                                                                                                                                                                                                                                                                                                                                                                                                     |
| EPI_ISL_452208 | hCoV-19/India/NIV-751102/2020     | Asia / India / Maharashtra           | 2020-04-05 | NIV Influenza                                                          | NIV Influenza                                           | Lukasz Rabalski, Anna Piotrowska-Mietelska, Maciej Kosinski, Boguslaw Szwedczyk, Krystyna Bienkowska-Szwedczyk                                                                                                                                                                                                                                                                                                                                                                                                                                                                                                                                                                                                                                                                                                                                     |
| EPI_ISL_452209 | hCoV-19/India/NIV-7766/2020       | Asia / India / Maharashtra           | 2020-04-06 | NIV Influenza                                                          | NIV Influenza                                           | Lukasz Rabalski, Anna Piotrowska-Mietelska, Maciej Kosinski, Boguslaw Szwedczyk, Krystyna Bienkowska-Szwedczyk                                                                                                                                                                                                                                                                                                                                                                                                                                                                                                                                                                                                                                                                                                                                     |
| EPI_ISL_452210 | hCoV-19/India/NIV-7830/2020       | Asia / India / Maharashtra           | 2020-04-06 | NIV Influenza                                                          | NIV Influenza                                           | Lukasz Rabalski, Anna Piotrowska-Mietelska, Maciej Kosinski, Boguslaw Szwedczyk, Krystyna Bienkowska-Szwedczyk                                                                                                                                                                                                                                                                                                                                                                                                                                                                                                                                                                                                                                                                                                                                     |
| EPI_ISL_452211 | hCoV-19/India/NIV-9157/2020       | Asia / India / Maharashtra           | 2020-04-13 | NIV Influenza                                                          | NIV Influenza                                           | Lukasz Rabalski, Anna Piotrowska-Mietelska, Maciej Kosinski, Boguslaw Szwedczyk, Krystyna Bienkowska-Szwedczyk                                                                                                                                                                                                                                                                                                                                                                                                                                                                                                                                                                                                                                                                                                                                     |
| EPI_ISL_452212 | hCoV-19/India/NIV-9768/2020       | Asia / India / Maharashtra           | 2020-04-15 | NIV Influenza                                                          | NIV Influenza                                           | Lukasz Rabalski, Anna Piotrowska-Mietelska, Maciej Kosinski, Boguslaw Szwedczyk, Krystyna Bienkowska-Szwedczyk                                                                                                                                                                                                                                                                                                                                                                                                                                                                                                                                                                                                                                                                                                                                     |
| EPI_ISL_452213 | hCoV-19/India/NIV-981/2020        | Asia / India / Maharashtra           | 2020-03-10 | NIV Influenza                                                          | NIV Influenza                                           | Lukasz Rabalski, Anna Piotrowska-Mietelska, Maciej Kosinski, Boguslaw Szwedczyk, Krystyna Bienkowska-Szwedczyk                                                                                                                                                                                                                                                                                                                                                                                                                                                                                                                                                                                                                                                                                                                                     |
| EPI_ISL_452218 | hCoV-19/Germany/FrankfurtFM1/2020 | Europe / Germany / Frankfurt         | 2020-03-02 | University Hospital Frankfurt                                          | WideraToptan                                            | Tuna Toptan1, Sebastian Hoeft1, Sandra Westhaus1, Dennis Bokowa1, Annemarie Bengel1, Björn Rotter2, Klaus Hoffmeier2, Jirrich Cinsat1, Sandra Ciesek1, and Marek Widera18                                                                                                                                                                                                                                                                                                                                                                                                                                                                                                                                                                                                                                                                          |

|                |                                     |                                   |            |                                                                                                             |                                                                                                                    |                                                                                                                                                                                                                                                                                                                                                                                                                                                       |
|----------------|-------------------------------------|-----------------------------------|------------|-------------------------------------------------------------------------------------------------------------|--------------------------------------------------------------------------------------------------------------------|-------------------------------------------------------------------------------------------------------------------------------------------------------------------------------------------------------------------------------------------------------------------------------------------------------------------------------------------------------------------------------------------------------------------------------------------------------|
| EPI_ISL_452219 | hCoV-19/Germany/Frankfurt/FM3/2020  | Europe / Germany / Frankfurt      | 2020-03-02 | University Hospital Frankfurt                                                                               | Widera/Topfan                                                                                                      | Tuna Topfan1, Sebastian Hoeft1, Sandra Westhaus1, Denisa Bokjova1, Annemarie Berger1, Björn Rotter2, Klaus Hoffmeier2, Jindrich Cinatl1, Sandra Ciesek1, and Marek Widera1#                                                                                                                                                                                                                                                                           |
| EPI_ISL_452220 | hCoV-19/Germany/Frankfurt/FM4/2020  | Europe / Germany / Frankfurt      | 2020-03-02 | University Hospital Frankfurt                                                                               | Widera/Topfan                                                                                                      | Tuna Topfan1, Sebastian Hoeft1, Sandra Westhaus1, Denisa Bokjova1, Annemarie Berger1, Björn Rotter2, Klaus Hoffmeier2, Jindrich Cinatl1, Sandra Ciesek1, and Marek Widera1#                                                                                                                                                                                                                                                                           |
| EPI_ISL_452221 | hCoV-19/Germany/Frankfurt/FM5/2020  | Europe / Germany / Frankfurt      | 2020-03-02 | University Hospital Frankfurt                                                                               | Widera/Topfan                                                                                                      | Tuna Topfan1, Sebastian Hoeft1, Sandra Westhaus1, Denisa Bokjova1, Annemarie Berger1, Björn Rotter2, Klaus Hoffmeier2, Jindrich Cinatl1, Sandra Ciesek1, and Marek Widera1#                                                                                                                                                                                                                                                                           |
| EPI_ISL_452222 | hCoV-19/Germany/Frankfurt/FM6/2020  | Europe / Germany / Frankfurt      | 2020-03-02 | University Hospital Frankfurt                                                                               | Widera/Topfan                                                                                                      | Tuna Topfan1, Sebastian Hoeft1, Sandra Westhaus1, Denisa Bokjova1, Annemarie Berger1, Björn Rotter2, Klaus Hoffmeier2, Jindrich Cinatl1, Sandra Ciesek1, and Marek Widera1#                                                                                                                                                                                                                                                                           |
| EPI_ISL_452223 | hCoV-19/Germany/Frankfurt/FM7/2020  | Europe / Germany / Frankfurt      | 2020-03-02 | University Hospital Frankfurt                                                                               | Widera/Topfan                                                                                                      | Tuna Topfan1, Sebastian Hoeft1, Sandra Westhaus1, Denisa Bokjova1, Annemarie Berger1, Björn Rotter2, Klaus Hoffmeier2, Jindrich Cinatl1, Sandra Ciesek1, and Marek Widera1#                                                                                                                                                                                                                                                                           |
| EPI_ISL_452796 | hCoV-19/USA/VA-DCLS-0218/2020       | North America / USA / Virginia    | 2020-04-09 | Virginia DCLS                                                                                               | Virginia DCLS                                                                                                      |                                                                                                                                                                                                                                                                                                                                                                                                                                                       |
| EPI_ISL_452797 | hCoV-19/USA/VA-DCLS-0219/2020       | North America / USA / Virginia    | 2020-04-03 | Virginia DCLS                                                                                               | Virginia DCLS                                                                                                      |                                                                                                                                                                                                                                                                                                                                                                                                                                                       |
| EPI_ISL_452798 | hCoV-19/USA/VA-DCLS-0220/2020       | North America / USA / Virginia    | 2020-04-03 | Virginia DCLS                                                                                               | Virginia DCLS                                                                                                      |                                                                                                                                                                                                                                                                                                                                                                                                                                                       |
| EPI_ISL_452799 | hCoV-19/USA/VA-DCLS-0221/2020       | North America / USA / Virginia    | 2020-04-03 | Virginia DCLS                                                                                               | Virginia DCLS                                                                                                      |                                                                                                                                                                                                                                                                                                                                                                                                                                                       |
| EPI_ISL_454400 | hCoV-19/Kazakhstan/18243/2020       | Asia / Kazakhstan / Nur-Sultan    | 2020-04-16 | RSE "National Center for Biotechnology"                                                                     | RSE "National Center for Biotechnology"                                                                            | Alexandr Shevtsov, Ilyas Akhmetolayev, Viktoriya Lutsay, Asylulan Amirgazin, Askar Abdalyev, Akbota Rakhmetova, Zaira Aushakhmetova, Ruslan Kalendar, Yerlan Ramankulov                                                                                                                                                                                                                                                                               |
| EPI_ISL_454501 | hCoV-19/Kazakhstan/20679/2020       | Asia / Kazakhstan / Nur-Sultan    | 2020-04-20 | RSE "National Center for Biotechnology"                                                                     | RSE "National Center for Biotechnology"                                                                            | Alexandr Shevtsov, Ilyas Akhmetolayev, Viktoriya Lutsay, Asylulan Amirgazin, Askar Abdalyev, Akbota Rakhmetova, Zaira Aushakhmetova, Ruslan Kalendar, Yerlan Ramankulov                                                                                                                                                                                                                                                                               |
| EPI_ISL_454502 | hCoV-19/Kazakhstan/21399/2020       | Asia / Kazakhstan / Nur-Sultan    | 2020-04-20 | RSE "National Center for Biotechnology"                                                                     | RSE "National Center for Biotechnology"                                                                            | Alexandr Shevtsov, Ilyas Akhmetolayev, Viktoriya Lutsay, Asylulan Amirgazin, Askar Abdalyev, Akbota Rakhmetova, Zaira Aushakhmetova, Ruslan Kalendar, Yerlan Ramankulov                                                                                                                                                                                                                                                                               |
| EPI_ISL_454503 | hCoV-19/Kazakhstan/21927/2020       | Asia / Kazakhstan / Nur-Sultan    | 2020-04-22 | RSE "National Center for Biotechnology"                                                                     | RSE "National Center for Biotechnology"                                                                            | Alexandr Shevtsov, Ilyas Akhmetolayev, Viktoriya Lutsay, Asylulan Amirgazin, Askar Abdalyev, Akbota Rakhmetova, Zaira Aushakhmetova, Ruslan Kalendar, Yerlan Ramankulov                                                                                                                                                                                                                                                                               |
| EPI_ISL_454504 | hCoV-19/Kazakhstan/26473/2020       | Asia / Kazakhstan / Nur-Sultan    | 2020-04-26 | RSE "National Center for Biotechnology"                                                                     | RSE "National Center for Biotechnology"                                                                            | Alexandr Shevtsov, Ilyas Akhmetolayev, Viktoriya Lutsay, Asylulan Amirgazin, Askar Abdalyev, Akbota Rakhmetova, Zaira Aushakhmetova, Ruslan Kalendar, Yerlan Ramankulov                                                                                                                                                                                                                                                                               |
| EPI_ISL_454505 | hCoV-19/Kazakhstan/26474/2020       | Asia / Kazakhstan / Nur-Sultan    | 2020-04-26 | RSE "National Center for Biotechnology"                                                                     | RSE "National Center for Biotechnology"                                                                            | Alexandr Shevtsov, Ilyas Akhmetolayev, Viktoriya Lutsay, Asylulan Amirgazin, Askar Abdalyev, Akbota Rakhmetova, Zaira Aushakhmetova, Ruslan Kalendar, Yerlan Ramankulov                                                                                                                                                                                                                                                                               |
| EPI_ISL_454506 | hCoV-19/Kazakhstan/26478/2020       | Asia / Kazakhstan / Nur-Sultan    | 2020-04-26 | RSE "National Center for Biotechnology"                                                                     | RSE "National Center for Biotechnology"                                                                            | Alexandr Shevtsov, Ilyas Akhmetolayev, Viktoriya Lutsay, Asylulan Amirgazin, Askar Abdalyev, Akbota Rakhmetova, Zaira Aushakhmetova, Ruslan Kalendar, Yerlan Ramankulov                                                                                                                                                                                                                                                                               |
| EPI_ISL_454507 | hCoV-19/Kazakhstan/26489/2020       | Asia / Kazakhstan / Nur-Sultan    | 2020-04-26 | RSE "National Center for Biotechnology"                                                                     | RSE "National Center for Biotechnology"                                                                            | Alexandr Shevtsov, Ilyas Akhmetolayev, Viktoriya Lutsay, Asylulan Amirgazin, Askar Abdalyev, Akbota Rakhmetova, Zaira Aushakhmetova, Ruslan Kalendar, Yerlan Ramankulov                                                                                                                                                                                                                                                                               |
| EPI_ISL_454508 | hCoV-19/Kazakhstan/26491/2020       | Asia / Kazakhstan / Nur-Sultan    | 2020-04-19 | RSE "National Center for Biotechnology"                                                                     | RSE "National Center for Biotechnology"                                                                            | Alexandr Shevtsov, Ilyas Akhmetolayev, Viktoriya Lutsay, Asylulan Amirgazin, Askar Abdalyev, Akbota Rakhmetova, Zaira Aushakhmetova, Ruslan Kalendar, Yerlan Ramankulov                                                                                                                                                                                                                                                                               |
| EPI_ISL_454509 | hCoV-19/Kazakhstan/26497/2020       | Asia / Kazakhstan / Nur-Sultan    | 2020-04-26 | RSE "National Center for Biotechnology"                                                                     | RSE "National Center for Biotechnology"                                                                            | Alexandr Shevtsov, Ilyas Akhmetolayev, Viktoriya Lutsay, Asylulan Amirgazin, Askar Abdalyev, Akbota Rakhmetova, Zaira Aushakhmetova, Ruslan Kalendar, Yerlan Ramankulov                                                                                                                                                                                                                                                                               |
| EPI_ISL_454510 | hCoV-19/Kazakhstan/26501/2020       | Asia / Kazakhstan / Nur-Sultan    | 2020-04-26 | RSE "National Center for Biotechnology"                                                                     | RSE "National Center for Biotechnology"                                                                            | Alexandr Shevtsov, Ilyas Akhmetolayev, Viktoriya Lutsay, Asylulan Amirgazin, Askar Abdalyev, Akbota Rakhmetova, Zaira Aushakhmetova, Ruslan Kalendar, Yerlan Ramankulov                                                                                                                                                                                                                                                                               |
| EPI_ISL_454511 | hCoV-19/Kazakhstan/26506/2020       | Asia / Kazakhstan / Nur-Sultan    | 2020-04-26 | RSE "National Center for Biotechnology"                                                                     | RSE "National Center for Biotechnology"                                                                            | Alexandr Shevtsov, Ilyas Akhmetolayev, Viktoriya Lutsay, Asylulan Amirgazin, Askar Abdalyev, Akbota Rakhmetova, Zaira Aushakhmetova, Ruslan Kalendar, Yerlan Ramankulov                                                                                                                                                                                                                                                                               |
| EPI_ISL_454512 | hCoV-19/Kazakhstan/26548/2020       | Asia / Kazakhstan / Nur-Sultan    | 2020-04-26 | RSE "National Center for Biotechnology"                                                                     | RSE "National Center for Biotechnology"                                                                            | Alexandr Shevtsov, Ilyas Akhmetolayev, Viktoriya Lutsay, Asylulan Amirgazin, Askar Abdalyev, Akbota Rakhmetova, Zaira Aushakhmetova, Ruslan Kalendar, Yerlan Ramankulov                                                                                                                                                                                                                                                                               |
| EPI_ISL_454513 | hCoV-19/Kazakhstan/26549/2020       | Asia / Kazakhstan / Nur-Sultan    | 2020-04-26 | RSE "National Center for Biotechnology"                                                                     | RSE "National Center for Biotechnology"                                                                            | Alexandr Shevtsov, Ilyas Akhmetolayev, Viktoriya Lutsay, Asylulan Amirgazin, Askar Abdalyev, Akbota Rakhmetova, Zaira Aushakhmetova, Ruslan Kalendar, Yerlan Ramankulov                                                                                                                                                                                                                                                                               |
| EPI_ISL_454514 | hCoV-19/Kazakhstan/26585/2020       | Asia / Kazakhstan / Nur-Sultan    | 2020-04-26 | RSE "National Center for Biotechnology"                                                                     | RSE "National Center for Biotechnology"                                                                            | Alexandr Shevtsov, Ilyas Akhmetolayev, Viktoriya Lutsay, Asylulan Amirgazin, Askar Abdalyev, Akbota Rakhmetova, Zaira Aushakhmetova, Ruslan Kalendar, Yerlan Ramankulov                                                                                                                                                                                                                                                                               |
| EPI_ISL_454515 | hCoV-19/Kazakhstan/26617/2020       | Asia / Kazakhstan / Nur-Sultan    | 2020-04-26 | RSE "National Center for Biotechnology"                                                                     | RSE "National Center for Biotechnology"                                                                            | Alexandr Shevtsov, Ilyas Akhmetolayev, Viktoriya Lutsay, Asylulan Amirgazin, Askar Abdalyev, Akbota Rakhmetova, Zaira Aushakhmetova, Ruslan Kalendar, Yerlan Ramankulov                                                                                                                                                                                                                                                                               |
| EPI_ISL_454516 | hCoV-19/Kazakhstan/26827/2020       | Asia / Kazakhstan / Nur-Sultan    | 2020-04-26 | RSE "National Center for Biotechnology"                                                                     | RSE "National Center for Biotechnology"                                                                            | Alexandr Shevtsov, Ilyas Akhmetolayev, Viktoriya Lutsay, Asylulan Amirgazin, Askar Abdalyev, Akbota Rakhmetova, Zaira Aushakhmetova, Ruslan Kalendar, Yerlan Ramankulov                                                                                                                                                                                                                                                                               |
| EPI_ISL_454517 | hCoV-19/Kazakhstan/26828/2020       | Asia / Kazakhstan / Nur-Sultan    | 2020-04-26 | RSE "National Center for Biotechnology"                                                                     | RSE "National Center for Biotechnology"                                                                            | Alexandr Shevtsov, Ilyas Akhmetolayev, Viktoriya Lutsay, Asylulan Amirgazin, Askar Abdalyev, Akbota Rakhmetova, Zaira Aushakhmetova, Ruslan Kalendar, Yerlan Ramankulov                                                                                                                                                                                                                                                                               |
| EPI_ISL_454518 | hCoV-19/Kazakhstan/26829/2020       | Asia / Kazakhstan / Nur-Sultan    | 2020-04-26 | RSE "National Center for Biotechnology"                                                                     | RSE "National Center for Biotechnology"                                                                            | Alexandr Shevtsov, Ilyas Akhmetolayev, Viktoriya Lutsay, Asylulan Amirgazin, Askar Abdalyev, Akbota Rakhmetova, Zaira Aushakhmetova, Ruslan Kalendar, Yerlan Ramankulov                                                                                                                                                                                                                                                                               |
| EPI_ISL_454519 | hCoV-19/Kazakhstan/34391/2020       | Asia / Kazakhstan / Nur-Sultan    | 2020-04-26 | RSE "National Center for Biotechnology"                                                                     | RSE "National Center for Biotechnology"                                                                            | Alexandr Shevtsov, Ilyas Akhmetolayev, Viktoriya Lutsay, Asylulan Amirgazin, Askar Abdalyev, Akbota Rakhmetova, Zaira Aushakhmetova, Ruslan Kalendar, Yerlan Ramankulov                                                                                                                                                                                                                                                                               |
| EPI_ISL_454520 | hCoV-19/Kazakhstan/38533/2020       | Asia / Kazakhstan / Nur-Sultan    | 2020-04-26 | RSE "National Center for Biotechnology"                                                                     | RSE "National Center for Biotechnology"                                                                            | Alexandr Shevtsov, Ilyas Akhmetolayev, Viktoriya Lutsay, Asylulan Amirgazin, Askar Abdalyev, Akbota Rakhmetova, Zaira Aushakhmetova, Ruslan Kalendar, Yerlan Ramankulov                                                                                                                                                                                                                                                                               |
| EPI_ISL_454521 | hCoV-19/India/NV-11182/2020         | Asia / India / Maharashtra        | 2020-04-18 | NIV Influenza                                                                                               | NIV Influenza                                                                                                      | Poddar V                                                                                                                                                                                                                                                                                                                                                                                                                                              |
| EPI_ISL_454522 | hCoV-19/India/NV-11676/2020         | Asia / India / Maharashtra        | 2020-04-19 | NIV Influenza                                                                                               | NIV Influenza                                                                                                      | Poddar V                                                                                                                                                                                                                                                                                                                                                                                                                                              |
| EPI_ISL_454523 | hCoV-19/India/NV-11699/2020         | Asia / India / Maharashtra        | 2020-04-19 | NIV Influenza                                                                                               | NIV Influenza                                                                                                      | Poddar V                                                                                                                                                                                                                                                                                                                                                                                                                                              |
| EPI_ISL_454524 | hCoV-19/India/NV-10588/2020         | Asia / India / Maharashtra        | 2020-04-20 | NIV Influenza                                                                                               | NIV Influenza                                                                                                      | Poddar V                                                                                                                                                                                                                                                                                                                                                                                                                                              |
| EPI_ISL_454525 | hCoV-19/India/NV-17382/2020         | Asia / India / Maharashtra        | 2020-03-12 | NIV Influenza                                                                                               | NIV Influenza                                                                                                      | Poddar V                                                                                                                                                                                                                                                                                                                                                                                                                                              |
| EPI_ISL_454526 | hCoV-19/India/NV-18042/2020         | Asia / India / Maharashtra        | 2020-03-13 | NIV Influenza                                                                                               | NIV Influenza                                                                                                      | Poddar V                                                                                                                                                                                                                                                                                                                                                                                                                                              |
| EPI_ISL_454527 | hCoV-19/India/NV-22670/2020         | Asia / India / Maharashtra        | 2020-03-15 | NIV Influenza                                                                                               | NIV Influenza                                                                                                      | Poddar V                                                                                                                                                                                                                                                                                                                                                                                                                                              |
| EPI_ISL_454528 | hCoV-19/India/NV-34722/2020         | Asia / India / Maharashtra        | 2020-03-17 | NIV Influenza                                                                                               | NIV Influenza                                                                                                      | Poddar V                                                                                                                                                                                                                                                                                                                                                                                                                                              |
| EPI_ISL_454529 | hCoV-19/India/NV-41300/2020         | Asia / India / Maharashtra        | 2020-03-19 | NIV Influenza                                                                                               | NIV Influenza                                                                                                      | Poddar V                                                                                                                                                                                                                                                                                                                                                                                                                                              |
| EPI_ISL_454530 | hCoV-19/India/NV-42712/2020         | Asia / India / Maharashtra        | 2020-03-22 | NIV Influenza                                                                                               | NIV Influenza                                                                                                      | Poddar V                                                                                                                                                                                                                                                                                                                                                                                                                                              |
| EPI_ISL_454531 | hCoV-19/India/NV-43692/2020         | Asia / India / Maharashtra        | 2020-03-22 | NIV Influenza                                                                                               | NIV Influenza                                                                                                      | Poddar V                                                                                                                                                                                                                                                                                                                                                                                                                                              |
| EPI_ISL_454532 | hCoV-19/India/NV-43792/2020         | Asia / India / Maharashtra        | 2020-03-20 | NIV Influenza                                                                                               | NIV Influenza                                                                                                      | Poddar V                                                                                                                                                                                                                                                                                                                                                                                                                                              |
| EPI_ISL_454533 | hCoV-19/India/NV-44338/2020         | Asia / India / Maharashtra        | 2020-03-23 | NIV Influenza                                                                                               | NIV Influenza                                                                                                      | Poddar V                                                                                                                                                                                                                                                                                                                                                                                                                                              |
| EPI_ISL_454534 | hCoV-19/India/NV-48222/2020         | Asia / India / Maharashtra        | 2020-03-24 | NIV Influenza                                                                                               | NIV Influenza                                                                                                      | Poddar V                                                                                                                                                                                                                                                                                                                                                                                                                                              |
| EPI_ISL_454535 | hCoV-19/India/NV-50977/2020         | Asia / India / Maharashtra        | 2020-03-26 | NIV Influenza                                                                                               | NIV Influenza                                                                                                      | Poddar V                                                                                                                                                                                                                                                                                                                                                                                                                                              |
| EPI_ISL_454536 | hCoV-19/India/NV-51222/2020         | Asia / India / Maharashtra        | 2020-03-26 | NIV Influenza                                                                                               | NIV Influenza                                                                                                      | Poddar V                                                                                                                                                                                                                                                                                                                                                                                                                                              |
| EPI_ISL_454537 | hCoV-19/India/NV-51042/2020         | Asia / India / Maharashtra        | 2020-03-28 | NIV Influenza                                                                                               | NIV Influenza                                                                                                      | Poddar V                                                                                                                                                                                                                                                                                                                                                                                                                                              |
| EPI_ISL_454538 | hCoV-19/India/NV-51182/2020         | Asia / India / Maharashtra        | 2020-03-26 | NIV Influenza                                                                                               | NIV Influenza                                                                                                      | Poddar V                                                                                                                                                                                                                                                                                                                                                                                                                                              |
| EPI_ISL_454539 | hCoV-19/India/NV-58115_1/2020       | Asia / India / Maharashtra        | 2020-04-12 | NIV Influenza                                                                                               | NIV Influenza                                                                                                      | Poddar V                                                                                                                                                                                                                                                                                                                                                                                                                                              |
| EPI_ISL_454540 | hCoV-19/India/NV-62162/2020         | Asia / India / Maharashtra        | 2020-04-01 | NIV Influenza                                                                                               | NIV Influenza                                                                                                      | Poddar V                                                                                                                                                                                                                                                                                                                                                                                                                                              |
| EPI_ISL_454541 | hCoV-19/India/NV-62892/2020         | Asia / India / Maharashtra        | 2020-03-30 | NIV Influenza                                                                                               | NIV Influenza                                                                                                      | Poddar V                                                                                                                                                                                                                                                                                                                                                                                                                                              |
| EPI_ISL_454542 | hCoV-19/India/NV-63152/2020         | Asia / India / Maharashtra        | 2020-03-30 | NIV Influenza                                                                                               | NIV Influenza                                                                                                      | Poddar V                                                                                                                                                                                                                                                                                                                                                                                                                                              |
| EPI_ISL_454543 | hCoV-19/India/NV-64232/2020         | Asia / India / Maharashtra        | 2020-03-31 | NIV Influenza                                                                                               | NIV Influenza                                                                                                      | Poddar V                                                                                                                                                                                                                                                                                                                                                                                                                                              |
| EPI_ISL_454544 | hCoV-19/India/NV-68142/2020         | Asia / India / Maharashtra        | 2020-04-01 | NIV Influenza                                                                                               | NIV Influenza                                                                                                      | Poddar V                                                                                                                                                                                                                                                                                                                                                                                                                                              |
| EPI_ISL_454545 | hCoV-19/India/NV-66382/2020         | Asia / India / Maharashtra        | 2020-04-02 | NIV Influenza                                                                                               | NIV Influenza                                                                                                      | Poddar V                                                                                                                                                                                                                                                                                                                                                                                                                                              |
| EPI_ISL_454546 | hCoV-19/India/NV-68642/2020         | Asia / India / Maharashtra        | 2020-04-03 | NIV Influenza                                                                                               | NIV Influenza                                                                                                      | Poddar V                                                                                                                                                                                                                                                                                                                                                                                                                                              |
| EPI_ISL_454547 | hCoV-19/India/NV-70442/2020         | Asia / India / Maharashtra        | 2020-04-04 | NIV Influenza                                                                                               | NIV Influenza                                                                                                      | Poddar V                                                                                                                                                                                                                                                                                                                                                                                                                                              |
| EPI_ISL_454548 | hCoV-19/India/NV-70692/2020         | Asia / India / Maharashtra        | 2020-04-03 | NIV Influenza                                                                                               | NIV Influenza                                                                                                      | Poddar V                                                                                                                                                                                                                                                                                                                                                                                                                                              |
| EPI_ISL_454549 | hCoV-19/India/NV-75592/2020         | Asia / India / Maharashtra        | 2020-04-05 | NIV Influenza                                                                                               | NIV Influenza                                                                                                      | Poddar V                                                                                                                                                                                                                                                                                                                                                                                                                                              |
| EPI_ISL_454550 | hCoV-19/India/NV-78322/2020         | Asia / India / Maharashtra        | 2020-04-06 | NIV Influenza                                                                                               | NIV Influenza                                                                                                      | Poddar V                                                                                                                                                                                                                                                                                                                                                                                                                                              |
| EPI_ISL_454551 | hCoV-19/India/NV-78932/2020         | Asia / India / Maharashtra        | 2020-04-07 | NIV Influenza                                                                                               | NIV Influenza                                                                                                      | Poddar V                                                                                                                                                                                                                                                                                                                                                                                                                                              |
| EPI_ISL_454552 | hCoV-19/India/NV-79662/2020         | Asia / India / Maharashtra        | 2020-04-06 | NIV Influenza                                                                                               | NIV Influenza                                                                                                      | Poddar V                                                                                                                                                                                                                                                                                                                                                                                                                                              |
| EPI_ISL_454553 | hCoV-19/India/NV-81872/2020         | Asia / India / Maharashtra        | 2020-04-02 | NIV Influenza                                                                                               | NIV Influenza                                                                                                      | Poddar V                                                                                                                                                                                                                                                                                                                                                                                                                                              |
| EPI_ISL_454554 | hCoV-19/India/NV-81992/2020         | Asia / India / Maharashtra        | 2020-04-02 | NIV Influenza                                                                                               | NIV Influenza                                                                                                      | Poddar V                                                                                                                                                                                                                                                                                                                                                                                                                                              |
| EPI_ISL_454555 | hCoV-19/India/NV-84042/2020         | Asia / India / Maharashtra        | 2020-04-07 | NIV Influenza                                                                                               | NIV Influenza                                                                                                      | Poddar V                                                                                                                                                                                                                                                                                                                                                                                                                                              |
| EPI_ISL_454556 | hCoV-19/India/NV-91272/2020         | Asia / India / Maharashtra        | 2020-04-12 | NIV Influenza                                                                                               | NIV Influenza                                                                                                      | Poddar V                                                                                                                                                                                                                                                                                                                                                                                                                                              |
| EPI_ISL_454557 | hCoV-19/India/NV-91542/2020         | Asia / India / Maharashtra        | 2020-04-13 | NIV Influenza                                                                                               | NIV Influenza                                                                                                      | Poddar V                                                                                                                                                                                                                                                                                                                                                                                                                                              |
| EPI_ISL_454558 | hCoV-19/India/NV-93142/2020         | Asia / India / Maharashtra        | 2020-04-13 | NIV Influenza                                                                                               | NIV Influenza                                                                                                      | Poddar V                                                                                                                                                                                                                                                                                                                                                                                                                                              |
| EPI_ISL_454559 | hCoV-19/India/NV-94072/2020         | Asia / India / Maharashtra        | 2020-03-29 | NIV Influenza                                                                                               | NIV Influenza                                                                                                      | Poddar V                                                                                                                                                                                                                                                                                                                                                                                                                                              |
| EPI_ISL_454560 | hCoV-19/India/NV-701_3/2020         | Asia / India / Maharashtra        | 2020-04-06 | NIV Influenza                                                                                               | NIV Influenza                                                                                                      | Poddar V                                                                                                                                                                                                                                                                                                                                                                                                                                              |
| EPI_ISL_454561 | hCoV-19/India/NV-726_3/2020         | Asia / India / Maharashtra        | 2020-04-07 | NIV Influenza                                                                                               | NIV Influenza                                                                                                      | Poddar V                                                                                                                                                                                                                                                                                                                                                                                                                                              |
| EPI_ISL_454562 | hCoV-19/India/NV-615_3/2020         | Asia / India / Maharashtra        | 2020-04-07 | NIV Influenza                                                                                               | NIV Influenza                                                                                                      | Poddar V                                                                                                                                                                                                                                                                                                                                                                                                                                              |
| EPI_ISL_454574 | hCoV-19/Croatia/OY_S1new/2020       | Europe / Croatia / Istria         | 2020-04-09 | Institute for Public Health University Hospital for Infectious Diseases "Dr. Fran Mihajević", Research Unit | Laboratory for advanced genomics University of Zagreb, Centre for research and knowledge transfer in biotechnology | Ivan-Christina Kurut, Jelena Ivancic Jelecki, Anamarija Slovic                                                                                                                                                                                                                                                                                                                                                                                        |
| EPI_ISL_454578 | hCoV-19/Croatia/592_Osijek/2020     | Europe / Croatia / Osijek         | 2020-03-13 | University Hospital for Infectious Diseases "Dr. Fran Mihajević", Research Unit                             | University of Zagreb, Centre for research and knowledge transfer in biotechnology                                  | Ivan-Christina Kurut, Jelena Ivancic Jelecki, Anamarija Slovic                                                                                                                                                                                                                                                                                                                                                                                        |
| EPI_ISL_454581 | hCoV-19/Croatia/1146_Split/2020     | Europe / Croatia / Split          | 2020-03-18 | University Hospital for Infectious Diseases "Dr. Fran Mihajević", Research Unit                             | University of Zagreb, Centre for research and knowledge transfer in biotechnology                                  | Ivan-Christina Kurut, Jelena Ivancic Jelecki, Anamarija Slovic                                                                                                                                                                                                                                                                                                                                                                                        |
| EPI_ISL_454583 | hCoV-19/Croatia/1560_Split/2020     | Europe / Croatia / Split          | 2020-03-18 | University Hospital for Infectious Diseases "Dr. Fran Mihajević", Research Unit                             | University of Zagreb, Centre for research and knowledge transfer in biotechnology                                  | Ivan-Christina Kurut, Jelena Ivancic Jelecki, Anamarija Slovic                                                                                                                                                                                                                                                                                                                                                                                        |
| EPI_ISL_454588 | hCoV-19/Croatia/1781_Dubrovnik/2020 | Europe / Croatia / Dubrovnik      | 2020-03-20 | University Hospital for Infectious Diseases "Dr. Fran Mihajević", Research Unit                             | University of Zagreb, Centre for research and knowledge transfer in biotechnology                                  | Ivan-Christina Kurut, Jelena Ivancic Jelecki, Anamarija Slovic                                                                                                                                                                                                                                                                                                                                                                                        |
| EPI_ISL_454592 | hCoV-19/Croatia/297_Varsadin/2020   | Europe / Croatia / Varsadin       | 2020-03-05 | University Hospital for Infectious Diseases "Dr. Fran Mihajević", Research Unit                             | University of Zagreb, Centre for research and knowledge transfer in biotechnology                                  | Ivan-Christina Kurut, Jelena Ivancic Jelecki, Anamarija Slovic                                                                                                                                                                                                                                                                                                                                                                                        |
| EPI_ISL_454595 | hCoV-19/Croatia/361_Pula/2020       | Europe / Croatia / Pula           | 2020-03-09 | University Hospital for Infectious Diseases "Dr. Fran Mihajević", Research Unit                             | University of Zagreb, Centre for research and knowledge transfer in biotechnology                                  | Ivan-Christina Kurut, Jelena Ivancic Jelecki, Anamarija Slovic                                                                                                                                                                                                                                                                                                                                                                                        |
| EPI_ISL_454732 | hCoV-19/Russia/Moscow_PMV/1-6/2020  | Europe / Russia / Moscow          | 2020-04-02 | Russian State Collection of Viruses                                                                         | Pathogenic Microorganisms Variability Laboratory                                                                   | Ivan-Christina Kurut, Jelena Ivancic Jelecki, Anamarija Slovic                                                                                                                                                                                                                                                                                                                                                                                        |
| EPI_ISL_454749 | hCoV-19/Japan/OP0321/2020           | Asia / Japan                      | 2020-02-16 | Japanese Quarantine Stations                                                                                | Pathogen Genomics Center, National Institute of Infectious Diseases                                                | Denise Probstko, Alexey Shchepochin, Maria Nifedova, Elena Shidlovskaya, Nadezhda Kuznetsova, Vladimir Gushchin, Irina Dolzhikova, Daria Grousova, Andrey Bolotov, Denis Logunov, Alexander Ginzburg, Alexey Mazaev, Tsuyoshi Sekizuka, Kentaro Iwakawa, Rina Tanaka, Masanori Hashino, Tadamasa Kageyama, Shiro Saito, Ryoji Takayama, Hideki Hasegawa, Takumi Takahashi, Hajime Kamura, Takuya Yamaguchi, Moto Suzuki, Takayuki Waki, Makoto Kurita |
| EPI_ISL_454830 | hCoV-19/India/SMSCOV109/2020        | Asia / India / Rajasthan / Jaipur | 2020-04-23 | SMS Medical College, Jaipur                                                                                 | CSIR Institute of Genomics and Integrative Biology                                                                 | Souhir Bhandari, Rahul Bhojwari, Mohammed Imran, Mohit Divakar, Disha Sharma, Anshul Kumar, Bani Jolly, Rahul Sahlot, Abhinav Jain, Paras Sehgal, Gyan Ranjan, Vinod Scaria, Sridhar Sivasubbu, Sandeep K Mathur                                                                                                                                                                                                                                      |
| EPI_ISL_454831 | hCoV-19/India/SMSCOV141/2020        | Asia / India / Rajasthan / Jaipur | 2020-04-29 | SMS Medical College, Jaipur                                                                                 | CSIR Institute of Genomics and Integrative Biology                                                                 | Souhir Bhandari, Rahul Bhojwari, Mohammed Imran, Mohit Divakar, Disha Sharma, Anshul Kumar, Bani Jolly, Rahul Sahlot, Abhinav Jain, Paras Sehgal, Gyan Ranjan, Vinod Scaria, Sridhar Sivasubbu, Sandeep K Mathur                                                                                                                                                                                                                                      |
| EPI_ISL_454833 | hCoV-19/India/SMSCOV161/2020        | Asia / India / Rajasthan / Jaipur | 2020-04-21 | SMS Medical College, Jaipur                                                                                 | CSIR Institute of Genomics and Integrative Biology                                                                 | Souhir Bhandari, Rahul Bhojwari, Mohammed Imran, Mohit Divakar, Disha Sharma, Anshul Kumar, Bani Jolly, Rahul Sahlot, Abhinav Jain, Paras Sehgal, Gyan Ranjan, Vinod Scaria, Sridhar Sivasubbu, Sandeep K Mathur                                                                                                                                                                                                                                      |
| EPI_ISL_454838 | hCoV-19/India/SMSCOV175/2020        | Asia / India / Rajasthan / Jaipur | 2020-04-27 | SMS Medical College, Jaipur                                                                                 | CSIR Institute of Genomics and Integrative Biology                                                                 | Souhir Bhandari, Rahul Bhojwari, Mohammed Imran, Mohit Divakar, Disha Sharma, Anshul Kumar, Bani Jolly, Rahul Sahlot, Abhinav Jain, Paras Sehgal, Gyan Ranjan, Vinod Scaria, Sridhar Sivasubbu, Sandeep K Mathur                                                                                                                                                                                                                                      |
| EPI_ISL_454858 | hCoV-19/India/THSTI-BAL_39/2020     | Asia / India / Haryana            | 2020-04-07 | Translational Health Science and Technology Institute- ESIC medical college and hospital, Faridabad         | THSTI Bioassay laboratory                                                                                          | Saurabh Kumar, Jigme Wangchuk, Anil Kumar Pandey, Asim Datta, Gurpreet R. Medgesha                                                                                                                                                                                                                                                                                                                                                                    |

|                |                                           |                                     |            |                                                                                                     |                                                                                             |
|----------------|-------------------------------------------|-------------------------------------|------------|-----------------------------------------------------------------------------------------------------|---------------------------------------------------------------------------------------------|
| EPI_ISL_454859 | hCoV-19/India/THSTI-BAL_41/2020           | Asia / India / Haryana              | 2020-04-07 | Translational Health Science and Technology Institute- ESIC medical college and hospital, Faridabad | THSTI Biossafety laboratory                                                                 |
| EPI_ISL_454860 | hCoV-19/India/THSTI-BAL_42/2020           | Asia / India / Haryana              | 2020-04-07 | Translational Health Science and Technology Institute- ESIC medical college and hospital, Faridabad | THSTI Biossafety laboratory                                                                 |
| EPI_ISL_454861 | hCoV-19/India/THSTI-BAL_43/2020           | Asia / India / Haryana              | 2020-04-07 | Translational Health Science and Technology Institute- ESIC medical college and hospital, Faridabad | THSTI Biossafety laboratory                                                                 |
| EPI_ISL_454862 | hCoV-19/India/THSTI-BAL_231/2020          | Asia / India / Haryana              | 2020-04-11 | Translational Health Science and Technology Institute- ESIC medical college and hospital, Faridabad | THSTI Biossafety laboratory                                                                 |
| EPI_ISL_454863 | hCoV-19/India/THSTI-BAL_360/2020          | Asia / India / Haryana              | 2020-04-13 | Translational Health Science and Technology Institute- ESIC medical college and hospital, Faridabad | THSTI Biossafety laboratory                                                                 |
| EPI_ISL_454864 | hCoV-19/India/THSTI-BAL_912/2020          | Asia / India / Haryana              | 2020-04-16 | Translational Health Science and Technology Institute- ESIC medical college and hospital, Faridabad | THSTI Biossafety laboratory                                                                 |
| EPI_ISL_454865 | hCoV-19/India/THSTI-BAL_913/2020          | Asia / India / Haryana              | 2020-04-16 | Translational Health Science and Technology Institute- ESIC medical college and hospital, Faridabad | THSTI Biossafety laboratory                                                                 |
| EPI_ISL_454866 | hCoV-19/India/THSTI-BAL_914/2020          | Asia / India / Haryana              | 2020-04-16 | Translational Health Science and Technology Institute- ESIC medical college and hospital, Faridabad | THSTI Biossafety laboratory                                                                 |
| EPI_ISL_454867 | hCoV-19/India/THSTI-BAL_918/2020          | Asia / India / Haryana              | 2020-04-16 | Translational Health Science and Technology Institute- ESIC medical college and hospital, Faridabad | THSTI Biossafety laboratory                                                                 |
| EPI_ISL_455312 | hCoV-19/Malaysia/IUM16/2020               | Asia / Malaysia / Pahang            | 2020-04-09 | Microbiology Unit, Department of Pathology & Laboratory Medicine, IUM Medical Centre                | SEA Microsome Unit, Faculty of Industrial Sciences & Technology, Universiti Malaysia Pahang |
| EPI_ISL_455313 | hCoV-19/Malaysia/IUM19/2020               | Asia / Malaysia / Pahang            | 2020-04-02 | Microbiology Unit, Department of Pathology & Laboratory Medicine, IUM Medical Centre                | SEA Microsome Unit, Faculty of Industrial Sciences & Technology, Universiti Malaysia Pahang |
| EPI_ISL_455314 | hCoV-19/Spain/Andalucia201257/2020        | Europe / Spain / Andalusia          | 2020-03-28 | Hospital Virgen del Rocío                                                                           | Instituto de Salud Carlos III                                                               |
| EPI_ISL_455315 | hCoV-19/Spain/Andalucia201488/2020        | Europe / Spain / Andalusia          | 2020-03-04 | Hospital Virgen de las Nieves                                                                       | Instituto de Salud Carlos III                                                               |
| EPI_ISL_455316 | hCoV-19/Spain/Andalucia201613/2020        | Europe / Spain / Andalusia          | 2020-03-05 | Hospital Virgen de las Nieves                                                                       | Instituto de Salud Carlos III                                                               |
| EPI_ISL_455317 | hCoV-19/Spain/Andalucia201614/2020        | Europe / Spain / Andalusia          | 2020-03-05 | Hospital Virgen de las Nieves                                                                       | Instituto de Salud Carlos III                                                               |
| EPI_ISL_455318 | hCoV-19/Spain/Andalucia201615/2020        | Europe / Spain / Andalusia          | 2020-03-05 | Hospital Virgen de las Nieves                                                                       | Instituto de Salud Carlos III                                                               |
| EPI_ISL_455319 | hCoV-19/Spain/Andalucia201616/2020        | Europe / Spain / Andalusia          | 2020-03-05 | Hospital Virgen de las Nieves                                                                       | Instituto de Salud Carlos III                                                               |
| EPI_ISL_455320 | hCoV-19/Spain/Andalucia201620/2020        | Europe / Spain / Andalusia          | 2020-03-05 | Hospital Virgen de las Nieves                                                                       | Instituto de Salud Carlos III                                                               |
| EPI_ISL_455321 | hCoV-19/Spain/Andalucia201622/2020        | Europe / Spain / Andalusia          | 2020-03-05 | Hospital Virgen de las Nieves                                                                       | Instituto de Salud Carlos III                                                               |
| EPI_ISL_455322 | hCoV-19/Spain/Andalucia201623/2020        | Europe / Spain / Andalusia          | 2020-03-05 | Hospital Virgen de las Nieves                                                                       | Instituto de Salud Carlos III                                                               |
| EPI_ISL_455323 | hCoV-19/Spain/Andalucia201636/2020        | Europe / Spain / Andalusia          | 2020-03-06 | Hospital Virgen del Rocío                                                                           | Instituto de Salud Carlos III                                                               |
| EPI_ISL_455324 | hCoV-19/Spain/Andalucia201640/2020        | Europe / Spain / Andalusia          | 2020-03-03 | Hospital Virgen de las Nieves                                                                       | Instituto de Salud Carlos III                                                               |
| EPI_ISL_455325 | hCoV-19/Spain/Canarias201871/2020         | Europe / Spain / Canary Islands     | 2020-03-05 | Hospital Universitario de Canarias                                                                  | Instituto de Salud Carlos III                                                               |
| EPI_ISL_455326 | hCoV-19/Spain/Canarias201939/2020         | Europe / Spain / Canary Islands     | 2020-02-29 | Hospital Universitario Insular de Gran Canaria                                                      | Instituto de Salud Carlos III                                                               |
| EPI_ISL_455327 | hCoV-19/Spain/CastillaLaMancha201306/2020 | Europe / Spain / Castilla La Mancha | 2020-03-02 | Consejería de Sanidad y Asuntos Sociales                                                            | Instituto de Salud Carlos III                                                               |
| EPI_ISL_455328 | hCoV-19/Spain/Galicia201792/2020          | Europe / Spain / Galicia            | 2020-03-09 | Complejo Hospitalario Universitario La Coruña                                                       | Instituto de Salud Carlos III                                                               |
| EPI_ISL_455329 | hCoV-19/Spain/Galicia201793/2020          | Europe / Spain / Galicia            | 2020-03-09 | Complejo Hospitalario Universitario La Coruña                                                       | Instituto de Salud Carlos III                                                               |
| EPI_ISL_455330 | hCoV-19/Spain/Galicia201796/2020          | Europe / Spain / Galicia            | 2020-03-09 | Complejo Hospitalario Universitario La Coruña                                                       | Instituto de Salud Carlos III                                                               |
| EPI_ISL_455331 | hCoV-19/Spain/Galicia201863/2020          | Europe / Spain / Galicia            | 2020-03-10 | Complejo Hospitalario Universitario La Coruña                                                       | Instituto de Salud Carlos III                                                               |
| EPI_ISL_455332 | hCoV-19/Spain/Galicia202076/2020          | Europe / Spain / Galicia            | 2020-03-10 | Xerencia de Xestión Integrada de Pontevedra e o Sainés                                              | Instituto de Salud Carlos III                                                               |
| EPI_ISL_455333 | hCoV-19/Spain/Galicia202203/2020          | Europe / Spain / Galicia            | 2020-03-11 | Complejo Hospitalario de Santiago                                                                   | Instituto de Salud Carlos III                                                               |
| EPI_ISL_455334 | hCoV-19/Spain/Galicia202262/2020          | Europe / Spain / Galicia            | 2020-03-11 | Complejo Hospitalario de Orense                                                                     | Instituto de Salud Carlos III                                                               |
| EPI_ISL_455335 | hCoV-19/Spain/Galicia202297/2020          | Europe / Spain / Galicia            | 2020-03-11 | Complejo Hospitalario de Orense                                                                     | Instituto de Salud Carlos III                                                               |
| EPI_ISL_455336 | hCoV-19/Spain/LaRioja201277/2020          | Europe / Spain / La Rioja           | 2020-02-29 | Hospital San Pedro                                                                                  | Instituto de Salud Carlos III                                                               |
| EPI_ISL_455337 | hCoV-19/Spain/LaRioja201334/2020          | Europe / Spain / La Rioja           | 2020-03-01 | Hospital San Pedro                                                                                  | Instituto de Salud Carlos III                                                               |
| EPI_ISL_455338 | hCoV-19/Spain/LaRioja201663/2020          | Europe / Spain / La Rioja           | 2020-03-04 | Hospital San Pedro                                                                                  | Instituto de Salud Carlos III                                                               |
| EPI_ISL_455339 | hCoV-19/Spain/LaRioja201665/2020          | Europe / Spain / La Rioja           | 2020-03-04 | Hospital San Pedro                                                                                  | Instituto de Salud Carlos III                                                               |
| EPI_ISL_455340 | hCoV-19/Spain/LaRioja201668/2020          | Europe / Spain / La Rioja           | 2020-03-05 | Hospital San Pedro                                                                                  | Instituto de Salud Carlos III                                                               |
| EPI_ISL_455341 | hCoV-19/Spain/LaRioja201970/2020          | Europe / Spain / La Rioja           | 2020-03-03 | Hospital San Pedro                                                                                  | Instituto de Salud Carlos III                                                               |
| EPI_ISL_455342 | hCoV-19/Spain/LaRioja201972/2020          | Europe / Spain / La Rioja           | 2020-03-03 | Hospital San Pedro                                                                                  | Instituto de Salud Carlos III                                                               |
| EPI_ISL_455343 | hCoV-19/Spain/LaRioja201976/2020          | Europe / Spain / La Rioja           | 2020-03-03 | Hospital San Pedro                                                                                  | Instituto de Salud Carlos III                                                               |
| EPI_ISL_455344 | hCoV-19/Spain                             |                                     |            |                                                                                                     |                                                                                             |

|                |                                                     |                                                      |            |                                                                                                            |                                                                              |                                                                                                                                                                                                                                                                                                                                                                                                                                                                               |
|----------------|-----------------------------------------------------|------------------------------------------------------|------------|------------------------------------------------------------------------------------------------------------|------------------------------------------------------------------------------|-------------------------------------------------------------------------------------------------------------------------------------------------------------------------------------------------------------------------------------------------------------------------------------------------------------------------------------------------------------------------------------------------------------------------------------------------------------------------------|
| EPI_ISL_458029 | hCoV-19/Taiwan/TSGH-38/2020                         | Asia / Taiwan / Taipei                               | 2020-03-24 | TSGH-CP molecular lab                                                                                      | TSGH-CP molecular lab                                                        | Cheng-Lih Peng, Ming-Jr JIAN, Chih-Kai Cheng, Jung-Chung Lin, Kuo-Ming Yeh, Chen-Wen Chen, Sheng-Kang Chu, Haing-Yi Chung, Shih-Hung Tsai, Kuo-Sheng Hung, Tien-Yue Chang, Feng-Yee Chang, Hung-Sheng Shang                                                                                                                                                                                                                                                                   |
| EPI_ISL_458079 | hCoV-19/Indonesia/EJ-ITD1238Sp/2020                 | Asia / Indonesia / Surabaya                          | 2020-03-30 | Mitra Keluarga Hospital Kerjenan                                                                           | Institute of Tropical Disease, Universitas Airlangga                         | Aldise M Nasti, Jezza R Dewantari, Rima R Prasetya, Kironoadi Rahardo, Anastasia W Jeluna, Galot Soegarto, Laksmi Wulandari, Retno A Setyoningrum, Resti Yudhawati, Yohko K Shimizu, Mitsuhito Nishimura, Yasuko Mori, Soejitpo, Kazufumi Shimizu, Maria I Lusida                                                                                                                                                                                                             |
| EPI_ISL_458081 | hCoV-19/Indonesia/EJ-ITD1272NT/2020                 | Asia / Indonesia / Pasuruan                          | 2020-03-30 | RSUD Bangil Pasuruan                                                                                       | Institute of Tropical Disease, Universitas Airlangga                         | Jezza R Dewantari, Rima R Prasetya, Kironoadi Rahardo, Aldise M Nasti, Arma Rosasiana, Galot Soegarto, Laksmi Wulandari, Retno A Setyoningrum, Resti Yudhawati, Yohko K Shimizu, Mitsuhito Nishimura, Yasuko Mori, Soejitpo, Kazufumi Shimizu, Maria I Lusida                                                                                                                                                                                                                 |
| EPI_ISL_458082 | hCoV-19/Indonesia/EJ-ITD2766NT/2020                 | Asia / Indonesia / Surabaya                          | 2020-04-09 | Universitas Airlangga Hospital                                                                             | Institute of Tropical Disease, Universitas Airlangga                         | Rima R Prasetya, Kironoadi Rahardo, Aldise M Nasti, Jezza R Dewantari, Iwasti Marga, Galot Soegarto, Laksmi Wulandari, Retno A Setyoningrum, Resti Yudhawati, Yohko K Shimizu, Mitsuhito Nishimura, Yasuko Mori, Soejitpo, Kazufumi Shimizu, Maria I Lusida                                                                                                                                                                                                                   |
| EPI_ISL_458083 | hCoV-19/Indonesia/EJ-ITD10101NT/2020                | Asia / Indonesia / Surabaya                          | 2020-04-11 | Adi Husada Undaan Hospital                                                                                 | Institute of Tropical Disease, Universitas Airlangga                         | Dhaval Vaghela, Ramesh Patel, Pranay Shah, Kamlesh J Upadhyay, Ramesh Pandit, Tejas Shah, Ankit Hirsu, Pritesh Sabara, Apuravsinh Puvur, Janvi Ravai, Zama Patel, Monika Gandhi, Pinal Trivedi, Mahanishi Pandya, Amit Kanani, Nidhi Patel, Nalin Savaliya, Raghavendra Kumar, Dinesh Kumar, Zuber Sayied, Komal Patel, Labith Pandya, Snehal Bagatharia, Neha Rapara, Bhavesh Modi, Gaurishankar Shrinimal, R D Dixit, A M Kadi, Umang Mishra, Chaitanya Joshi, Madhvi Joshi |
| EPI_ISL_458086 | hCoV-19/India/GJRC131/2020                          | Asia / India / Gujarat / Ahmedabad                   | 2020-05-24 | B.J. Medical College and Civil hospital                                                                    | Gujarat Biotechnology Research Centre                                        | Ramesh Patel, Pranay Shah, Kamlesh J Upadhyay, Ramesh Pandit, Tejas Shah, Ankit Hirsu, Pritesh Sabara, Apuravsinh Puvur, Janvi Ravai, Zama Patel, Monika Gandhi, Pinal Trivedi, Mahanishi Pandya, Amit Kanani, Nidhi Patel, Nalin Savaliya, Raghavendra Kumar, Dinesh Kumar, Zuber Sayied, Komal Patel, Labith Pandya, Snehal Bagatharia, Neha Rapara, Bhavesh Modi, Gaurishankar Shrinimal, R D Dixit, A M Kadi, Umang Mishra, Chaitanya Joshi, Madhvi Joshi                 |
| EPI_ISL_458087 | hCoV-19/India/GJRC132/2020                          | Asia / India / Gujarat / Ahmedabad                   | 2020-05-24 | B.J. Medical College and Civil hospital                                                                    | Gujarat Biotechnology Research Centre                                        | Ramesh Patel, Pranay Shah, Kamlesh J Upadhyay, Ramesh Pandit, Tejas Shah, Ankit Hirsu, Pritesh Sabara, Apuravsinh Puvur, Janvi Ravai, Zama Patel, Monika Gandhi, Pinal Trivedi, Mahanishi Pandya, Amit Kanani, Nidhi Patel, Nalin Savaliya, Raghavendra Kumar, Dinesh Kumar, Zuber Sayied, Komal Patel, Labith Pandya, Snehal Bagatharia, Neha Rapara, Bhavesh Modi, Gaurishankar Shrinimal, R D Dixit, A M Kadi, Umang Mishra, Chaitanya Joshi, Madhvi Joshi                 |
| EPI_ISL_458088 | hCoV-19/India/GJRC133/2020                          | Asia / India / Gujarat / Ahmedabad                   | 2020-05-24 | B.J. Medical College and Civil hospital                                                                    | Gujarat Biotechnology Research Centre                                        | Ramesh Patel, Pranay Shah, Kamlesh J Upadhyay, Ramesh Pandit, Tejas Shah, Ankit Hirsu, Pritesh Sabara, Apuravsinh Puvur, Janvi Ravai, Zama Patel, Monika Gandhi, Pinal Trivedi, Mahanishi Pandya, Amit Kanani, Nidhi Patel, Nalin Savaliya, Raghavendra Kumar, Dinesh Kumar, Zuber Sayied, Komal Patel, Labith Pandya, Snehal Bagatharia, Neha Rapara, Bhavesh Modi, Gaurishankar Shrinimal, R D Dixit, A M Kadi, Umang Mishra, Chaitanya Joshi, Madhvi Joshi                 |
| EPI_ISL_458089 | hCoV-19/India/GJRC134/2020                          | Asia / India / Gujarat / Ahmedabad                   | 2020-05-24 | B.J. Medical College and Civil hospital                                                                    | Gujarat Biotechnology Research Centre                                        | Ramesh Patel, Pranay Shah, Kamlesh J Upadhyay, Ramesh Pandit, Tejas Shah, Ankit Hirsu, Pritesh Sabara, Apuravsinh Puvur, Janvi Ravai, Zama Patel, Monika Gandhi, Pinal Trivedi, Mahanishi Pandya, Amit Kanani, Nidhi Patel, Nalin Savaliya, Raghavendra Kumar, Dinesh Kumar, Zuber Sayied, Komal Patel, Labith Pandya, Snehal Bagatharia, Neha Rapara, Bhavesh Modi, Gaurishankar Shrinimal, R D Dixit, A M Kadi, Umang Mishra, Chaitanya Joshi, Madhvi Joshi                 |
| EPI_ISL_458090 | hCoV-19/India/GJRC135a/2020                         | Asia / India / Gujarat / Ahmedabad                   | 2020-05-24 | B.J. Medical College and Civil hospital                                                                    | Gujarat Biotechnology Research Centre                                        | Ramesh Patel, Pranay Shah, Kamlesh J Upadhyay, Ramesh Pandit, Tejas Shah, Ankit Hirsu, Pritesh Sabara, Apuravsinh Puvur, Janvi Ravai, Zama Patel, Monika Gandhi, Pinal Trivedi, Mahanishi Pandya, Amit Kanani, Nidhi Patel, Nalin Savaliya, Raghavendra Kumar, Dinesh Kumar, Zuber Sayied, Komal Patel, Labith Pandya, Snehal Bagatharia, Neha Rapara, Bhavesh Modi, Gaurishankar Shrinimal, R D Dixit, A M Kadi, Umang Mishra, Chaitanya Joshi, Madhvi Joshi                 |
| EPI_ISL_458091 | hCoV-19/India/GJRC135a/2020                         | Asia / India / Gujarat / Ahmedabad                   | 2020-05-24 | B.J. Medical College and Civil hospital                                                                    | Gujarat Biotechnology Research Centre                                        | Ramesh Patel, Pranay Shah, Kamlesh J Upadhyay, Ramesh Pandit, Tejas Shah, Ankit Hirsu, Pritesh Sabara, Apuravsinh Puvur, Janvi Ravai, Zama Patel, Monika Gandhi, Pinal Trivedi, Mahanishi Pandya, Amit Kanani, Nidhi Patel, Nalin Savaliya, Raghavendra Kumar, Dinesh Kumar, Zuber Sayied, Komal Patel, Labith Pandya, Snehal Bagatharia, Neha Rapara, Bhavesh Modi, Gaurishankar Shrinimal, R D Dixit, A M Kadi, Umang Mishra, Chaitanya Joshi, Madhvi Joshi                 |
| EPI_ISL_458092 | hCoV-19/India/GJRC136a/2020                         | Asia / India / Gujarat / Ahmedabad                   | 2020-05-24 | B.J. Medical College and Civil hospital                                                                    | Gujarat Biotechnology Research Centre                                        | Ramesh Patel, Pranay Shah, Kamlesh J Upadhyay, Ramesh Pandit, Tejas Shah, Ankit Hirsu, Pritesh Sabara, Apuravsinh Puvur, Janvi Ravai, Zama Patel, Monika Gandhi, Pinal Trivedi, Mahanishi Pandya, Amit Kanani, Nidhi Patel, Nalin Savaliya, Raghavendra Kumar, Dinesh Kumar, Zuber Sayied, Komal Patel, Labith Pandya, Snehal Bagatharia, Neha Rapara, Bhavesh Modi, Gaurishankar Shrinimal, R D Dixit, A M Kadi, Umang Mishra, Chaitanya Joshi, Madhvi Joshi                 |
| EPI_ISL_458093 | hCoV-19/India/GJRC136b/2020                         | Asia / India / Gujarat / Ahmedabad                   | 2020-05-24 | B.J. Medical College and Civil hospital                                                                    | Gujarat Biotechnology Research Centre                                        | Ramesh Patel, Pranay Shah, Kamlesh J Upadhyay, Ramesh Pandit, Tejas Shah, Ankit Hirsu, Pritesh Sabara, Apuravsinh Puvur, Janvi Ravai, Zama Patel, Monika Gandhi, Pinal Trivedi, Mahanishi Pandya, Amit Kanani, Nidhi Patel, Nalin Savaliya, Raghavendra Kumar, Dinesh Kumar, Zuber Sayied, Komal Patel, Labith Pandya, Snehal Bagatharia, Neha Rapara, Bhavesh Modi, Gaurishankar Shrinimal, R D Dixit, A M Kadi, Umang Mishra, Chaitanya Joshi, Madhvi Joshi                 |
| EPI_ISL_458094 | hCoV-19/India/GJRC137a/2020                         | Asia / India / Gujarat / Ahmedabad                   | 2020-05-24 | B.J. Medical College and Civil hospital                                                                    | Gujarat Biotechnology Research Centre                                        | Ramesh Patel, Pranay Shah, Kamlesh J Upadhyay, Ramesh Pandit, Tejas Shah, Ankit Hirsu, Pritesh Sabara, Apuravsinh Puvur, Janvi Ravai, Zama Patel, Monika Gandhi, Pinal Trivedi, Mahanishi Pandya, Amit Kanani, Nidhi Patel, Nalin Savaliya, Raghavendra Kumar, Dinesh Kumar, Zuber Sayied, Komal Patel, Labith Pandya, Snehal Bagatharia, Neha Rapara, Bhavesh Modi, Gaurishankar Shrinimal, R D Dixit, A M Kadi, Umang Mishra, Chaitanya Joshi, Madhvi Joshi                 |
| EPI_ISL_458095 | hCoV-19/India/GJRC137b/2020                         | Asia / India / Gujarat / Ahmedabad                   | 2020-05-24 | B.J. Medical College and Civil hospital                                                                    | Gujarat Biotechnology Research Centre                                        | Ramesh Patel, Pranay Shah, Kamlesh J Upadhyay, Ramesh Pandit, Tejas Shah, Ankit Hirsu, Pritesh Sabara, Apuravsinh Puvur, Janvi Ravai, Zama Patel, Monika Gandhi, Pinal Trivedi, Mahanishi Pandya, Amit Kanani, Nidhi Patel, Nalin Savaliya, Raghavendra Kumar, Dinesh Kumar, Zuber Sayied, Komal Patel, Labith Pandya, Snehal Bagatharia, Neha Rapara, Bhavesh Modi, Gaurishankar Shrinimal, R D Dixit, A M Kadi, Umang Mishra, Chaitanya Joshi, Madhvi Joshi                 |
| EPI_ISL_458096 | hCoV-19/India/GJRC138/2020                          | Asia / India / Gujarat / Ahmedabad                   | 2020-05-24 | B.J. Medical College and Civil hospital                                                                    | Gujarat Biotechnology Research Centre                                        | Ramesh Patel, Pranay Shah, Kamlesh J Upadhyay, Ramesh Pandit, Tejas Shah, Ankit Hirsu, Pritesh Sabara, Apuravsinh Puvur, Janvi Ravai, Zama Patel, Monika Gandhi, Pinal Trivedi, Mahanishi Pandya, Amit Kanani, Nidhi Patel, Nalin Savaliya, Raghavendra Kumar, Dinesh Kumar, Zuber Sayied, Komal Patel, Labith Pandya, Snehal Bagatharia, Neha Rapara, Bhavesh Modi, Gaurishankar Shrinimal, R D Dixit, A M Kadi, Umang Mishra, Chaitanya Joshi, Madhvi Joshi                 |
| EPI_ISL_458097 | hCoV-19/India/GJRC139a/2020                         | Asia / India / Gujarat / Ahmedabad                   | 2020-05-24 | B.J. Medical College and Civil hospital                                                                    | Gujarat Biotechnology Research Centre                                        | Ramesh Patel, Pranay Shah, Kamlesh J Upadhyay, Ramesh Pandit, Tejas Shah, Ankit Hirsu, Pritesh Sabara, Apuravsinh Puvur, Janvi Ravai, Zama Patel, Monika Gandhi, Pinal Trivedi, Mahanishi Pandya, Amit Kanani, Nidhi Patel, Nalin Savaliya, Raghavendra Kumar, Dinesh Kumar, Zuber Sayied, Komal Patel, Labith Pandya, Snehal Bagatharia, Neha Rapara, Bhavesh Modi, Gaurishankar Shrinimal, R D Dixit, A M Kadi, Umang Mishra, Chaitanya Joshi, Madhvi Joshi                 |
| EPI_ISL_458098 | hCoV-19/India/GJRC139b/2020                         | Asia / India / Gujarat / Ahmedabad                   | 2020-05-24 | B.J. Medical College and Civil hospital                                                                    | Gujarat Biotechnology Research Centre                                        | Ramesh Patel, Pranay Shah, Kamlesh J Upadhyay, Ramesh Pandit, Tejas Shah, Ankit Hirsu, Pritesh Sabara, Apuravsinh Puvur, Janvi Ravai, Zama Patel, Monika Gandhi, Pinal Trivedi, Mahanishi Pandya, Amit Kanani, Nidhi Patel, Nalin Savaliya, Raghavendra Kumar, Dinesh Kumar, Zuber Sayied, Komal Patel, Labith Pandya, Snehal Bagatharia, Neha Rapara, Bhavesh Modi, Gaurishankar Shrinimal, R D Dixit, A M Kadi, Umang Mishra, Chaitanya Joshi, Madhvi Joshi                 |
| EPI_ISL_458099 | hCoV-19/India/GJRC140/2020                          | Asia / India / Gujarat / Ahmedabad                   | 2020-05-24 | B.J. Medical College and Civil hospital                                                                    | Gujarat Biotechnology Research Centre                                        | Ramesh Patel, Pranay Shah, Kamlesh J Upadhyay, Ramesh Pandit, Tejas Shah, Ankit Hirsu, Pritesh Sabara, Apuravsinh Puvur, Janvi Ravai, Zama Patel, Monika Gandhi, Pinal Trivedi, Mahanishi Pandya, Amit Kanani, Nidhi Patel, Nalin Savaliya, Raghavendra Kumar, Dinesh Kumar, Zuber Sayied, Komal Patel, Labith Pandya, Snehal Bagatharia, Neha Rapara, Bhavesh Modi, Gaurishankar Shrinimal, R D Dixit, A M Kadi, Umang Mishra, Chaitanya Joshi, Madhvi Joshi                 |
| EPI_ISL_458236 | hCoV-19/Costa Rica/CV-0007/2020                     | North America / Costa Rica / San Jose                | 2020-03-06 | Hospital Mexico                                                                                            | Charite Virgilio-University of Costa Rica                                    | Marc Noguera-Julian, Mariana Pareja, Maria Pilar Arment, Marc Corbacho, Maria Urbal, Oriol Miró, Lidia Ruiz, Nuria Izquierdo, Jorge Carrillo, Roger Paredes, Juli Blanco, Joaquín Segalés, Bonaventura Cid                                                                                                                                                                                                                                                                    |
| EPI_ISL_462447 | hCoV-19/Spain/CSA-ca-50/2020                        | Europe / Spain / Barcelona                           | 2020-03-22 | Fundació Lluïa contra la SIDA (FLSIDa)/Hospital Universitari Germans Trias i Pujol                         | InsCaixa AIDS Research Lab                                                   | Marc Noguera-Julian, Mariana Pareja, Maria Pilar Arment, Marc Corbacho, Maria Urbal, Oriol Miró, Lidia Ruiz, Nuria Izquierdo, Jorge Carrillo, Roger Paredes, Juli Blanco, Joaquín Segalés, Bonaventura Cid                                                                                                                                                                                                                                                                    |
| EPI_ISL_462448 | hCoV-19/Spain/CSA-ca-142/2020                       | Europe / Spain / Barcelona                           | 2020-03-24 | Fundació Lluïa contra la SIDA (FLSIDa)/Hospital Universitari Germans Trias i Pujol                         | InsCaixa AIDS Research Lab                                                   | Marc Noguera-Julian, Mariana Pareja, Maria Pilar Arment, Marc Corbacho, Maria Urbal, Oriol Miró, Lidia Ruiz, Nuria Izquierdo, Jorge Carrillo, Roger Paredes, Juli Blanco, Joaquín Segalés, Bonaventura Cid                                                                                                                                                                                                                                                                    |
| EPI_ISL_462449 | hCoV-19/Spain/CSA-ca-15/2020                        | Europe / Spain / Barcelona                           | 2020-03-20 | Fundació Lluïa contra la SIDA (FLSIDa)/Hospital Universitari Germans Trias i Pujol                         | InsCaixa AIDS Research Lab                                                   | Marc Noguera-Julian, Mariana Pareja, Maria Pilar Arment, Marc Corbacho, Maria Urbal, Oriol Miró, Lidia Ruiz, Nuria Izquierdo, Jorge Carrillo, Roger Paredes, Juli Blanco, Joaquín Segalés, Bonaventura Cid                                                                                                                                                                                                                                                                    |
| EPI_ISL_462477 | hCoV-19/Spain/Andalucia202659/2020                  | Europe / Spain / Andalusia                           | 2020-03-13 | Hospital Costa del Sol                                                                                     | Instituto de Salud Carlos III                                                | Szymon Hryniewicz, Adam Ustaszewski, Emilia Lis, Marta Kaczmarska-Ryś, Michał Wit, Andrzej Paweł                                                                                                                                                                                                                                                                                                                                                                              |
| EPI_ISL_462480 | hCoV-19/Poland/HQ_PAS_3_57/2020                     | Europe / Poland / Wielkopolskie                      | 2020-05-13 | Institute of Human Genetics, Polish Academy of Sciences                                                    | Institute of Human Genetics, Polish Academy of Sciences                      | Beata G, Szeja G, Tosi E, Maj T, Miszka H, Aida K, Alma S.A.                                                                                                                                                                                                                                                                                                                                                                                                                  |
| EPI_ISL_462930 | hCoV-19/Bosnia and Herzegovina/62-Banja Luka/Europe | Europe / Bosnia and Herzegovina/62-Banja Luka/Europe | 2020-04-29 | University Clinical Centre of the Republic of Srpska                                                       | Department of Molecular Virology, Cyprus Institute of Neurology and Genetics | Jan Richter, George Kriashas, Christina Tryfonos, Stavros Bashardes, Dana Koptides, Christina Christodoulou                                                                                                                                                                                                                                                                                                                                                                   |
| EPI_ISL_463741 | hCoV-19/Cyprus001/2020                              | Europe / Cyprus                                      | 2020-05-11 | Department of Molecular Virology, Cyprus Institute of Neurology and Genetics                               | Department of Molecular Virology, Cyprus Institute of Neurology and Genetics | Jan Richter, George Kriashas, Christina Tryfonos, Stavros Bashardes, Dana Koptides, Christina Christodoulou                                                                                                                                                                                                                                                                                                                                                                   |
| EPI_ISL_463742 | hCoV-19/Cyprus002/2020                              | Europe / Cyprus                                      | 2020-05-22 | Department of Molecular Virology, Cyprus Institute of Neurology and Genetics                               | Department of Molecular Virology, Cyprus Institute of Neurology and Genetics | Jan Richter, George Kriashas, Christina Tryfonos, Stavros Bashardes, Dana Koptides, Christina Christodoulou                                                                                                                                                                                                                                                                                                                                                                   |
| EPI_ISL_463743 | hCoV-19/Cyprus003/2020                              | Europe / Cyprus                                      | 2020-05-25 | Department of Molecular Virology, Cyprus Institute of Neurology and Genetics                               | Department of Molecular Virology, Cyprus Institute of Neurology and Genetics | Jan Richter, George Kriashas, Christina Tryfonos, Stavros Bashardes, Dana Koptides, Christina Christodoulou                                                                                                                                                                                                                                                                                                                                                                   |
| EPI_ISL_463744 | hCoV-19/Cyprus004/2020                              | Europe / Cyprus                                      | 2020-05-23 | Department of Molecular Virology, Cyprus Institute of Neurology and Genetics                               | Department of Molecular Virology, Cyprus Institute of Neurology and Genetics | Jan Richter, George Kriashas, Christina Tryfonos, Stavros Bashardes, Dana Koptides, Christina Christodoulou                                                                                                                                                                                                                                                                                                                                                                   |
| EPI_ISL_463745 | hCoV-19/Cyprus005/2020                              | Europe / Cyprus                                      | 2020-04-01 | Department of Molecular Virology, Cyprus Institute of Neurology and Genetics                               | Department of Molecular Virology, Cyprus Institute of Neurology and Genetics | Jan Richter, George Kriashas, Christina Tryfonos, Stavros Bashardes, Dana Koptides, Christina Christodoulou                                                                                                                                                                                                                                                                                                                                                                   |
| EPI_ISL_463746 | hCoV-19/Cyprus006/2020                              | Europe / Cyprus                                      | 2020-04-11 | Department of Molecular Virology, Cyprus Institute of Neurology and Genetics                               | Department of Molecular Virology, Cyprus Institute of Neurology and Genetics | Jan Richter, George Kriashas, Christina Tryfonos, Stavros Bashardes, Dana Koptides, Christina Christodoulou                                                                                                                                                                                                                                                                                                                                                                   |
| EPI_ISL_463747 | hCoV-19/Cyprus007/2020                              | Europe / Cyprus                                      | 2020-04-17 | Department of Molecular Virology, Cyprus Institute of Neurology and Genetics                               | Department of Molecular Virology, Cyprus Institute of Neurology and Genetics | Jan Richter, George Kriashas, Christina Tryfonos, Stavros Bashardes, Dana Koptides, Christina Christodoulou                                                                                                                                                                                                                                                                                                                                                                   |
| EPI_ISL_463748 | hCoV-19/Cyprus008/2020                              | Europe / Cyprus                                      | 2020-04-27 | Department of Molecular Virology, Cyprus Institute of Neurology and Genetics                               | Department of Molecular Virology, Cyprus Institute of Neurology and Genetics | Jan Richter, George Kriashas, Christina Tryfonos, Stavros Bashardes, Dana Koptides, Christina Christodoulou                                                                                                                                                                                                                                                                                                                                                                   |
| EPI_ISL_466652 | hCoV-19/USANE-10744/2020                            | North America / USA / Nebraska                       | 2020-05-05 | Nebraska Public Health Laboratory                                                                          | UNMC COVID-19 Response Team                                                  | UNMC COVID-19 Response Team                                                                                                                                                                                                                                                                                                                                                                                                                                                   |
| EPI_ISL_466653 | hCoV-19/USANE-10746/2020                            | North America / USA / Nebraska                       | 2020-05-05 | Nebraska Public Health Laboratory                                                                          | UNMC COVID-19 Response Team                                                  | UNMC COVID-19 Response Team                                                                                                                                                                                                                                                                                                                                                                                                                                                   |
| EPI_ISL_466654 | hCoV-19/USANE-10838/2020                            | North America / USA / Nebraska                       | 2020-05-04 | Nebraska Public Health Laboratory                                                                          | UNMC COVID-19 Response Team                                                  | UNMC COVID-19 Response Team                                                                                                                                                                                                                                                                                                                                                                                                                                                   |
| EPI_ISL_466655 | hCoV-19/USANE-10840/2020                            | North America / USA / Nebraska                       | 2020-05-04 | Nebraska Public Health Laboratory                                                                          | UNMC COVID-19 Response Team                                                  | UNMC COVID-19 Response Team                                                                                                                                                                                                                                                                                                                                                                                                                                                   |
| EPI_ISL_466656 | hCoV-19/USANE-10853/2020                            | North America / USA / Nebraska                       | 2020-05-04 | Nebraska Public Health Laboratory                                                                          | UNMC COVID-19 Response Team                                                  | UNMC COVID-19 Response Team                                                                                                                                                                                                                                                                                                                                                                                                                                                   |
| EPI_ISL_466657 | hCoV-19/USANE-10867/2020                            | North America / USA / Nebraska                       | 2020-05-04 | Nebraska Public Health Laboratory                                                                          | UNMC COVID-19 Response Team                                                  | UNMC COVID-19 Response Team                                                                                                                                                                                                                                                                                                                                                                                                                                                   |
| EPI_ISL_466658 | hCoV-19/USANE-10869/2020                            | North America / USA / Nebraska                       | 2020-05-04 | Nebraska Public Health Laboratory                                                                          | UNMC COVID-19 Response Team                                                  | UNMC COVID-19 Response Team                                                                                                                                                                                                                                                                                                                                                                                                                                                   |
| EPI_ISL_466659 | hCoV-19/USANE-10871/2020                            | North America / USA / Nebraska                       | 2020-05-04 | Nebraska Public Health Laboratory                                                                          | UNMC COVID-19 Response Team                                                  | UNMC COVID-19 Response Team                                                                                                                                                                                                                                                                                                                                                                                                                                                   |
| EPI_ISL_466660 | hCoV-19/USANE-11039/2020                            | North America / USA / Nebraska                       | 2020-05-04 | Nebraska Public Health Laboratory                                                                          | UNMC COVID-19 Response Team                                                  | UNMC COVID-19 Response Team                                                                                                                                                                                                                                                                                                                                                                                                                                                   |
| EPI_ISL_466661 | hCoV-19/USANE-11323/2020                            | North America / USA / Nebraska                       | 2020-05-04 | Nebraska Public Health Laboratory                                                                          | UNMC COVID-19 Response Team                                                  | UNMC COVID-19 Response Team                                                                                                                                                                                                                                                                                                                                                                                                                                                   |
| EPI_ISL_466662 | hCoV-19/USANE-11363/2020                            | North America / USA / Nebraska                       | 2020-05-04 | Nebraska Public Health Laboratory                                                                          | UNMC COVID-19 Response Team                                                  | UNMC COVID-19 Response Team                                                                                                                                                                                                                                                                                                                                                                                                                                                   |
| EPI_ISL_466663 | hCoV-19/USANE-10725/2020                            | North America / USA / Nebraska                       | 2020-05-04 | Nebraska Public Health Laboratory                                                                          | UNMC COVID-19 Response Team                                                  | UNMC COVID-19 Response Team                                                                                                                                                                                                                                                                                                                                                                                                                                                   |
| EPI_ISL_466664 | hCoV-19/USANE-10732/2020                            | North America / USA / Nebraska                       | 2020-05-05 | Nebraska Public Health Laboratory                                                                          | UNMC COVID-19 Response Team                                                  | UNMC COVID-19 Response Team                                                                                                                                                                                                                                                                                                                                                                                                                                                   |
| EPI_ISL_466665 | hCoV-19/USANE-10865/2020                            | North America / USA / Nebraska                       | 2020-05-04 | Nebraska Public Health Laboratory                                                                          | UNMC COVID-19 Response Team                                                  | UNMC COVID-19 Response Team                                                                                                                                                                                                                                                                                                                                                                                                                                                   |
| EPI_ISL_466666 | hCoV-19/USANE-10862/2020                            | North America / USA / Nebraska                       | 2020-05-04 | Nebraska Public Health Laboratory                                                                          | UNMC COVID-19 Response Team                                                  | UNMC COVID-19 Response Team                                                                                                                                                                                                                                                                                                                                                                                                                                                   |
| EPI_ISL_466667 | hCoV-19/USANE-10902/2020                            | North America / USA / Nebraska                       | 2020-05-04 | Nebraska Public Health Laboratory                                                                          | UNMC COVID-19 Response Team                                                  | UNMC COVID-19 Response Team                                                                                                                                                                                                                                                                                                                                                                                                                                                   |
| EPI_ISL_466668 | hCoV-19/USANE-10928/2020                            | North America / USA / Nebraska                       | 2020-05-04 | Nebraska Public Health Laboratory                                                                          | UNMC COVID-19 Response Team                                                  | UNMC COVID-19 Response Team                                                                                                                                                                                                                                                                                                                                                                                                                                                   |
| EPI_ISL_466669 | hCoV-19/USANE-10933/2020                            | North America / USA / Nebraska                       | 2020-05-04 | Nebraska Public Health Laboratory                                                                          | UNMC COVID-19 Response Team                                                  | UNMC COVID-19 Response Team                                                                                                                                                                                                                                                                                                                                                                                                                                                   |
| EPI_ISL_466670 | hCoV-19/USANE-10939/2020                            | North America / USA / Nebraska                       | 2020-05-04 | Nebraska Public Health Laboratory                                                                          | UNMC COVID-19 Response Team                                                  | UNMC COVID-19 Response Team                                                                                                                                                                                                                                                                                                                                                                                                                                                   |
| EPI_ISL_466671 | hCoV-19/USANE-10965/2020                            | North America / USA / Nebraska                       | 2020-05-04 | Nebraska Public Health Laboratory                                                                          | UNMC COVID-19 Response Team                                                  | UNMC COVID-19 Response Team                                                                                                                                                                                                                                                                                                                                                                                                                                                   |
| EPI_ISL_466672 | hCoV-19/USANE-11120/2020                            | North America / USA / Nebraska                       | 2020-05-04 | Nebraska Public Health Laboratory                                                                          | UNMC COVID-19 Response Team                                                  | UNMC COVID-19 Response Team                                                                                                                                                                                                                                                                                                                                                                                                                                                   |
| EPI_ISL_466673 | hCoV-19/USANE-11265/2020                            | North America / USA / Nebraska                       | 2020-05-04 | Nebraska Public Health Laboratory                                                                          | UNMC COVID-19 Response Team                                                  | UNMC COVID-19 Response Team                                                                                                                                                                                                                                                                                                                                                                                                                                                   |
| EPI_ISL_466674 | hCoV-19/USANE-11287/2020                            | North America / USA / Nebraska                       | 2020-05-04 | Nebraska Public Health Laboratory                                                                          | UNMC COVID-19 Response Team                                                  | UNMC COVID-19 Response Team                                                                                                                                                                                                                                                                                                                                                                                                                                                   |
| EPI_ISL_466675 | hCoV-19/USANE-11308/2020                            | North America / USA / Nebraska                       | 2020-05-04 | Nebraska Public Health Laboratory                                                                          | UNMC COVID-19 Response Team                                                  | UNMC COVID-19 Response Team                                                                                                                                                                                                                                                                                                                                                                                                                                                   |
| EPI_ISL_466676 | hCoV-19/USANE-11310/2020                            | North America / USA / Nebraska                       | 2020-05-04 | Nebraska Public Health Laboratory                                                                          | UNMC COVID-19 Response Team                                                  | UNMC COVID-19 Response Team                                                                                                                                                                                                                                                                                                                                                                                                                                                   |
| EPI_ISL_467299 | hCoV-19/Morocco/RAS/2020                            | Africa / Morocco                                     | 2020-05-21 | Research and Medical Analysis Laboratory of Gendarmier Royale                                              | Research and Medical Analysis Laboratory of Gendarmier Royale                | Abdel EL Kabbaj                                                                                                                                                                                                                                                                                                                                                                                                                                                               |
| EPI_ISL_467300 | hCoV-19/Bosnia and Herzegovina/64-Sarajevo/20Europe | Bosnia and Herzegovina / Sarajevo/20Europe           | 2020-04-08 | General Hospital "Abdulah Nuhak"                                                                           | Alia Genetic Center                                                          | Ustarić Siniša, Medical Center, Molecular Pathology Laboratory of Department of Pathology & Laboratory Medicine and Genomic Core                                                                                                                                                                                                                                                                                                                                              |
| EPI_ISL_467609 | hCoV-19/USACA-CSMC/2020                             | North America / USA / California / Los Angeles/2020  | 2020-03-27 | Cedars-Sinai Medical Center, Department of Pathology & Laboratory Medicine, Molecular Pathology Laboratory | Department of Pathology & Laboratory Medicine and Genomic Core               | Wenjian Zhang, John Paul Govindavani, Brian Davis, Stephanie Chen, Jong Taek Kim, Jianping Song, Jean Logothetis, Jennifer T Plummer, Eric Val, Filip Rakic, Lovro Tigrovac-Greif, Nven Subić, Tomislav Rakavina, Igor Jurak, Oliver Vugrek                                                                                                                                                                                                                                   |
| EPI_ISL_468591 | hCoV-19/Croatia/LG-52/new/2020                      | Europe / Croatia / Istria                            | 2020-04-10 | Institute for Public Health                                                                                | Laboratory for advanced genomics                                             | Filip Rakic, Lovro Tigrovac-Greif, Nven Subić, Tomislav Rakavina, Igor Jurak, Oliver Vugrek                                                                                                                                                                                                                                                                                                                                                                                   |
| EPI_ISL_468656 | hCoV-19/Croatia/AU-S10/new/2020                     | Europe / Croatia / Istria                            | 2020-04-09 | Institute for Public Health                                                                                | Laboratory for advanced genomics                                             | Filip Rakic, Lovro Tigrovac-Greif, Nven Subić, Tomislav Rakavina, Igor Jurak, Oliver Vugrek                                                                                                                                                                                                                                                                                                                                                                                   |



[illegible]

|                |                             |                                       |            |                |                                  |
|----------------|-----------------------------|---------------------------------------|------------|----------------|----------------------------------|
| EPI_ISL_470571 | hCoV-19/Brazil/IAI0204/2020 | South America / Brazil / Amazonas     | 2020-04-02 | Hermes Pardini | Bioinformatica Laboratory / LNCX |
| EPI_ISL_470572 | hCoV-19/Brazil/IAI0205/2020 | South America / Brazil / Amazonas     | 2020-04-02 | Hermes Pardini | Bioinformatica Laboratory / LNCX |
| EPI_ISL_470573 | hCoV-19/Brazil/CIE0206/2020 | South America / Brazil / Ceara        | 2020-04-02 | Hermes Pardini | Bioinformatica Laboratory / LNCX |
| EPI_ISL_470574 | hCoV-19/Brazil/GO0207/2020  | South America / Brazil / Goias        | 2020-03-13 | Hermes Pardini | Bioinformatica Laboratory / LNCX |
| EPI_ISL_470575 | hCoV-19/Brazil/GO0208/2020  | South America / Brazil / Goias        | 2020-03-18 | Hermes Pardini | Bioinformatica Laboratory / LNCX |
| EPI_ISL_470576 | hCoV-19/Brazil/GO0209/2020  | South America / Brazil / Goias        | 2020-04-03 | Hermes Pardini | Bioinformatica Laboratory / LNCX |
| EPI_ISL_470577 | hCoV-19/Brazil/GO0210/2020  | South America / Brazil / Goias        | 2020-04-04 | Hermes Pardini | Bioinformatica Laboratory / LNCX |
| EPI_ISL_470578 | hCoV-19/Brazil/MG0211/2020  | South America / Brazil / Minas Gerais | 2020-03-14 | Hermes Pardini | Bioinformatica Laboratory / LNCX |
| EPI_ISL_470579 | hCoV-19/Brazil/MG0212/2020  | South America / Brazil / Minas Gerais | 2020-03-14 | Hermes Pardini | Bioinformatica Laboratory / LNCX |
| EPI_ISL_470580 | hCoV-19/Brazil/MG0214/2020  | South America / Brazil / Minas Gerais | 2020-03-17 | Hermes Pardini | Bioinformatica Laboratory / LNCX |
| EPI_ISL_470581 | hCoV-19/Brazil/MG0215/2020  | South America / Brazil / Minas Gerais | 2020-03-19 | Hermes Pardini | Bioinformatica Laboratory / LNCX |
| EPI_ISL_470582 | hCoV-19/Brazil/MG0216/2020  | South America / Brazil / Minas Gerais | 2020-03-19 | Hermes Pardini | Bioinformatica Laboratory / LNCX |
| EPI_ISL_470583 | hCoV-19/Brazil/MG0217/2020  | South America / Brazil / Minas Gerais | 2020-03-20 | Hermes Pardini | Bioinformatica Laboratory / LNCX |
| EPI_ISL_470584 | hCoV-19/Brazil/MG0218/2020  | South America / Brazil / Minas Gerais | 2020-03-23 | Hermes Pardini | Bioinformatica Laboratory / LNCX |
| EPI_ISL_470585 | hCoV-19/Brazil/MG0219/2020  | South America / Brazil / Minas Gerais | 2020-04-03 | Hermes Pardini | Bioinformatica Laboratory / LNCX |
| EPI_ISL_470586 | hCoV-19/Brazil/MG0220/2020  | South America / Brazil / Minas Gerais | 2020-04-04 | Hermes Pardini | Bioinformatica Laboratory / LNCX |
| EPI_ISL_470587 | hCoV-19/Brazil/MG0221/2020  | South America / Brazil / Minas Gerais | 2020-04-05 | Hermes Pardini | Bioinformatica Laboratory / LNCX |
| EPI_ISL_470588 | hCoV-19/Brazil/MG0222/2020  | South America / Brazil / Minas Gerais | 2020-04-06 | Hermes Pardini | Bioinformatica Laboratory / LNCX |
| EPI_ISL_470589 | hCoV-19/Brazil/MG0225/2020  | South America / Brazil / Minas Gerais | 2020-04-13 | Simile         | Bioinformatica Laboratory / LNCX |
| EPI_ISL_470590 | hCoV-19/Brazil/MG0226/2020  | South America / Brazil / Minas Gerais | 2020-04-08 | Simile         | Bioinformatica Laboratory / LNCX |
| EPI_ISL_470591 | hCoV-19/Brazil/MG0228/2020  | South America / Brazil / Minas Gerais | 2020-04-17 | Simile         | Bioinformatica Laboratory / LNCX |
| EPI_ISL_470592 | hCoV-19/Brazil/MG0237/2020  | South America / Brazil / Minas Gerais | 2020-04-15 | Simile         | Bioinformatica Laboratory / LNCX |
| EPI_ISL_470593 | hCoV-19/Brazil/MG0238/2020  | South America / Brazil / Minas Gerais | 2020-04-09 | Simile         | Bioinformatica Laboratory / LNCX |
| EPI_ISL_470594 | hCoV-19/Brazil/MG0239/2020  | South America / Brazil / Minas Gerais | 2020-04-08 | Simile         | Bioinformatica Laboratory / LNCX |
| EPI_ISL_470595 | hCoV-19/Brazil/MG0239/2020  | South America / Brazil / Minas Gerais | 2020-04-03 | Simile         | Bioinformatica Laboratory / LNCX |
| EPI_ISL_470596 | hCoV-19/Brazil/MG0239/2020  | South America / Brazil / Minas Gerais | 2020-04-16 | Simile         | Bioinformatica Laboratory / LNCX |
| EPI_ISL_470597 | hCoV-19/Brazil/MG0239/2020  | South America / Brazil / Minas Gerais | 2020-04-05 | Simile         | Bioinformatica Laboratory / LNCX |
| EPI_ISL_470598 | hCoV-19/Brazil/MT0224/2020  | South America / Brazil / Mato Grosso  | 2020-03-18 | Hermes Pardini | Bioinformatica Laboratory / LNCX |
| EPI_ISL_470599 | hCoV-19/Brazil/MT0225/2020  | South America / Brazil / Mato Grosso  | 2020-03-19 | Hermes Pardini | Bioinformatica Laboratory / LNCX |

[illegible]

[illegible]

|                |                                         |                                                  |            |                                                                                                                                                                                                                               |                                                                                                                                                                                                                                                                                                                 |                                                                                                                                                                                                                                                                                                                                    |
|----------------|-----------------------------------------|--------------------------------------------------|------------|-------------------------------------------------------------------------------------------------------------------------------------------------------------------------------------------------------------------------------|-----------------------------------------------------------------------------------------------------------------------------------------------------------------------------------------------------------------------------------------------------------------------------------------------------------------|------------------------------------------------------------------------------------------------------------------------------------------------------------------------------------------------------------------------------------------------------------------------------------------------------------------------------------|
| EPI_ISL_475752 | hCoV-19/Egypt/MASRI-10/2020             | Africa / Egypt                                   | 2020-05    | Medical Ain Shams Research Institute (MASRI), Ain Shams University                                                                                                                                                            | Medical Ain Shams Research Institute (MASRI), Ain Shams University                                                                                                                                                                                                                                              | Hesham Elghazaly , Sara Hassan Agy, Mahmoud Elmehel, Ahmad Mostafa , Ashraf Omar, Osama Mansour, Samia Abdo, Hala Hake, Ghada Ismail, Shamas Moustafa , Aya Mohamed, Reham Mamoud , Hoda Abi Elstar, Manal Hamdy Elsiad, Fatma Elabd                                                                                               |
| EPI_ISL_475753 | hCoV-19/Egypt/MASRI-11/2020             | Africa / Egypt                                   | 2020-05    | Medical Ain Shams Research Institute (MASRI), Ain Shams University                                                                                                                                                            | Medical Ain Shams Research Institute (MASRI), Ain Shams University                                                                                                                                                                                                                                              | Hesham Elghazaly , Sara Hassan Agy, Mahmoud Elmehel, Ahmad Mostafa , Ashraf Omar, Osama Mansour, Samia Abdo, Hala Hake, Ghada Ismail, Shamas Moustafa , Aya Mohamed, Reham Mamoud , Hoda Abi Elstar, Manal Hamdy Elsiad, Fatma Elabd                                                                                               |
| EPI_ISL_476022 | hCoV-19/India/DRODE/08/2020             | Asia / India / Madhya Pradesh                    | 2020-03-25 | Defence Research & Development Establishment                                                                                                                                                                                  | Defence Research & Development Establishment                                                                                                                                                                                                                                                                    | Shaahi Shamas, Paban Kumar Dash, Jyoti S Kumar, Sushil Kumar Shama, Anbuji Shrivastava                                                                                                                                                                                                                                             |
| EPI_ISL_476023 | hCoV-19/India/DRODE/11/2020             | Asia / India / MP                                | 2020-03-31 | Defence Research & Development Establishment (DRDE)                                                                                                                                                                           | Defence Research & Development Establishment (DRDE)                                                                                                                                                                                                                                                             | Shaahi Shamas, Paban Kumar Dash, Sushil Kumar Shama, Anbuji Shrivastava, Jyoti S. Kumar                                                                                                                                                                                                                                            |
| EPI_ISL_476067 | hCoV-19/Czech Republic/NR_4033/2020     | Europe / Czech Republic / Hranice na M2020-03-11 | 2020-03-11 | The National Institute of Public Health                                                                                                                                                                                       | The National Institute of Public Health                                                                                                                                                                                                                                                                         | Nagy A.Jirincova,H.Novakova L.,Tmkla D,Vetecova J                                                                                                                                                                                                                                                                                  |
| EPI_ISL_476702 | hCoV-19/Venezuela/VE-8931/2020          | South America / Venezuela                        | 2020-04-02 | Incubadora Venezolana de Ciencia, Venezuela                                                                                                                                                                                   | Incubadora Venezolana de Ciencia, Venezuela / Instituto Nacional de Salud, Bogotá, Colombia / Grupo de Investigaciones Microbiológicas-UR (GIMUR), Departamento de Biología, Facultad de Ciencias Naturales, Universidad del Rosario, Bogotá, Colombia / Icahn School of Medicine at Mount Sinai, New York, USA | Alberto Paniz-Mondolfi, Marina Muñoz, Luis Perez-Garcia, Lourdes Delgado, Carolina Flores, Sergio Gomez, Angelica Rico, Lisbeth Parlo, Esther C. Barco, Carolina Hernández, Jesús E. James, Anibal A. Tereñán, Ana S. Gonzalez-Reiche, Matthew M. Hernandez, Emilia Ma Sordillo, Viviana Simon, Harm van Bakel, Juan David Ramirez |
| EPI_ISL_476703 | hCoV-19/Venezuela/VE-95070/2020         | South America / Venezuela                        | 2020-04-09 | Incubadora Venezolana de Ciencia, Venezuela                                                                                                                                                                                   | Incubadora Venezolana de Ciencia, Venezuela / Instituto Nacional de Salud, Bogotá, Colombia / Grupo de Investigaciones Microbiológicas-UR (GIMUR), Departamento de Biología, Facultad de Ciencias Naturales, Universidad del Rosario, Bogotá, Colombia / Icahn School of Medicine at Mount Sinai, New York, USA | Alberto Paniz-Mondolfi, Marina Muñoz, Luis Perez-Garcia, Lourdes Delgado, Carolina Flores, Sergio Gomez, Angelica Rico, Lisbeth Parlo, Esther C. Barco, Carolina Hernández, Jesús E. James, Anibal A. Tereñán, Ana S. Gonzalez-Reiche, Matthew M. Hernandez, Emilia Ma Sordillo, Viviana Simon, Harm van Bakel, Juan David Ramirez |
| EPI_ISL_476704 | hCoV-19/Venezuela/VE-95072/2020         | South America / Venezuela                        | 2020-04-09 | Incubadora Venezolana de Ciencia, Venezuela                                                                                                                                                                                   | Incubadora Venezolana de Ciencia, Venezuela / Instituto Nacional de Salud, Bogotá, Colombia / Grupo de Investigaciones Microbiológicas-UR (GIMUR), Departamento de Biología, Facultad de Ciencias Naturales, Universidad del Rosario, Bogotá, Colombia / Icahn School of Medicine at Mount Sinai, New York, USA | Alberto Paniz-Mondolfi, Marina Muñoz, Luis Perez-Garcia, Lourdes Delgado, Carolina Flores, Sergio Gomez, Angelica Rico, Lisbeth Parlo, Esther C. Barco, Carolina Hernández, Jesús E. James, Anibal A. Tereñán, Ana S. Gonzalez-Reiche, Matthew M. Hernandez, Emilia Ma Sordillo, Viviana Simon, Harm van Bakel, Juan David Ramirez |
| EPI_ISL_476795 | hCoV-19/Singapore/499/2020              | Asia / Singapore                                 | 2020-02-19 | Tan Tock Seng Hospital                                                                                                                                                                                                        | Tan Tock Seng Hospital                                                                                                                                                                                                                                                                                          | Chen YYC, Zair X, L.C., Tang WY, Maurer-Stroh S, Barkham TMS, Nagarajan N, Sessions OM                                                                                                                                                                                                                                             |
| EPI_ISL_476796 | hCoV-19/Singapore/27nan/2020            | Asia / Singapore                                 | 2020-03-06 | Tan Tock Seng Hospital                                                                                                                                                                                                        | Tan Tock Seng Hospital                                                                                                                                                                                                                                                                                          | Chen YYC, Zair X, L.C., Tang WY, Maurer-Stroh S, Barkham TMS, Nagarajan N, Sessions OM                                                                                                                                                                                                                                             |
| EPI_ISL_476797 | hCoV-19/Singapore/28nan/2020            | Asia / Singapore                                 | 2020-03-06 | Tan Tock Seng Hospital                                                                                                                                                                                                        | Tan Tock Seng Hospital                                                                                                                                                                                                                                                                                          | Chen YYC, Zair X, L.C., Tang WY, Maurer-Stroh S, Barkham TMS, Nagarajan N, Sessions OM                                                                                                                                                                                                                                             |
| EPI_ISL_406970 | hCoV-19/Finland/HZ-1/2020               | Europe / Finland / Lapland                       | 2020-01-20 | Lapland Central Hospital                                                                                                                                                                                                      | Lapland Central Hospital                                                                                                                                                                                                                                                                                        | Teemu Smura, Sivi Kulavainen, Hannamari Kallio-Kokko, Olli Väisälä                                                                                                                                                                                                                                                                 |
| EPI_ISL_407078 | hCoV-19/Japan/1-004/2020                | Asia / Japan / Aichi                             | 2020-01-25 | Department of Virology II, National Institute of Infectious Diseases                                                                                                                                                          | Department of Virology II, National Institute of Infectious Diseases                                                                                                                                                                                                                                            | Tsuyoshi Sekizuka, Shizuko Matsuyama, Nagaroni Nas, Kayuya Shirato, Shiji Watanabe, Makoto Takeuchi, Makoto Kuroda                                                                                                                                                                                                                 |
| EPI_ISL_407094 | hCoV-19/Belgium/GHB-03021/2020          | Europe / Belgium / Leuven                        | 2020-02-03 | KU Leuven, Clinical and Epidemiological Virology                                                                                                                                                                              | KU Leuven, Clinical and Epidemiological Virology                                                                                                                                                                                                                                                                | Bert Vanmechelen, Elke Wolraets, Annabel Reelot, Els Keyzers, Lies Laenen, Marc Van Ranst, and Piël Maes                                                                                                                                                                                                                           |
| EPI_ISL_408430 | hCoV-19/France/IDF0515/2020             | Europe / France / Ile-de-France / Paris          | 2020-01-29 | Department of Infectious and Tropical Diseases, Bichat Claude Bernard Hospital, Paris                                                                                                                                         | National Reference Center for Viruses of Respiratory Infections, Institut Pasteur, Paris                                                                                                                                                                                                                        | Mélanie Albert, Marion Barbet, Sylvie Behilli, Méline Bageat, Angèle Brisabane, Flora Donati, Vincent Enouf, Maud Vanpeene, Sylvie van der Werf, Yazdan Yazdpanhan, Xavier Lesourd                                                                                                                                                 |
| EPI_ISL_408431 | hCoV-19/France/IDF0626/2020             | Europe / France / Ile-de-France / Paris          | 2020-01-29 | Sorbonne Université, Inserm et Assistance Publique-Hôpitaux de Paris (Pitié Salpêtrière)                                                                                                                                      | National Reference Center for Viruses of Respiratory Infections, Institut Pasteur, Paris                                                                                                                                                                                                                        | Mélanie Albert, Marion Barbet, Sylvie Behilli, Méline Bageat, Angèle Brisabane, Flora Donati, Vincent Enouf, Maud Vanpeene, Sylvie van der Werf, Sonia Leclerc, Angèle Brisabane                                                                                                                                                   |
| EPI_ISL_408480 | hCoV-19/Yunnan/IDC-VN-003/2020          | Asia / China / Yunnan / Kunming                  | 2020-01-17 | National Institute for Viral Disease Control and Prevention, China CDC                                                                                                                                                        | National Institute for Viral Disease Control & Prevention, China CDC                                                                                                                                                                                                                                            | Wengjie Tan, Xiangqiang Xu, Xiang Zhao, Wenling Wang, Peihua Niu, Roujian Lu, Yangshun Sun, Baoqing Huang, Li Zhao, Fei Ye, Wenbo Xu, George F. Gao, Guizhen Wu                                                                                                                                                                    |
| EPI_ISL_408481 | hCoV-19/Chongqing/IDC-QC-001/2020       | Asia / China / Chongqing                         | 2020-01-18 | National Institute for Viral Disease Control and Prevention, China CDC                                                                                                                                                        | National Institute for Viral Disease Control & Prevention, China CDC                                                                                                                                                                                                                                            | Wengjie Tan, Xiangqiang Xu, Xiang Zhao, Wenling Wang, Peihua Niu, Roujian Lu, Yangshun Sun, Baoqing Huang, Li Zhao, Fei Ye, Wenbo Xu, George F. Gao, Guizhen Wu                                                                                                                                                                    |
| EPI_ISL_408482 | hCoV-19/Shandong/IDC-QD-001/2020        | Asia / China / Shandong / Qingdao                | 2020-01-19 | National Institute for Viral Disease Control and Prevention, China CDC                                                                                                                                                        | National Institute for Viral Disease Control & Prevention, China CDC                                                                                                                                                                                                                                            | Wengjie Tan, Xiangqiang Xu, Xiang Zhao, Wenling Wang, Peihua Niu, Roujian Lu, Yangshun Sun, Baoqing Huang, Li Zhao, Fei Ye, Wenbo Xu, George F. Gao, Guizhen Wu                                                                                                                                                                    |
| EPI_ISL_408483 | hCoV-19/Shanghai/IDC-SH-001/2020        | Asia / China / Shanghai                          | 2020-01-20 | National Institute for Viral Disease Control and Prevention, China CDC                                                                                                                                                        | National Institute for Viral Disease Control & Prevention, China CDC                                                                                                                                                                                                                                            | Wengjie Tan, Xiangqiang Xu, Xiang Zhao, Wenling Wang, Peihua Niu, Roujian Lu, Yangshun Sun, Baoqing Huang, Li Zhao, Fei Ye, Wenbo Xu, George F. Gao, Guizhen Wu                                                                                                                                                                    |
| EPI_ISL_408484 | hCoV-19/Shanghai/IDC-SC-001/2020        | Asia / China / Shanghai / Chengdu                | 2020-01-15 | National Institute for Viral Disease Control and Prevention, China CDC                                                                                                                                                        | National Institute for Viral Disease Control & Prevention, China CDC                                                                                                                                                                                                                                            | Wengjie Tan, Xiangqiang Xu, Xiang Zhao, Wenling Wang, Peihua Niu, Roujian Lu, Yangshun Sun, Baoqing Huang, Li Zhao, Fei Ye, Wenbo Xu, George F. Gao, Guizhen Wu                                                                                                                                                                    |
| EPI_ISL_408485 | hCoV-19/Beijing/IDC-BJ-005/2020         | Asia / China / Beijing                           | 2020-01-18 | National Institute for Viral Disease Control and Prevention, China CDC                                                                                                                                                        | National Institute for Viral Disease Control & Prevention, China CDC                                                                                                                                                                                                                                            | Wengjie Tan, Xiangqiang Xu, Xiang Zhao, Wenling Wang, Peihua Niu, Roujian Lu, Yangshun Sun, Baoqing Huang, Li Zhao, Fei Ye, Wenbo Xu, George F. Gao, Guizhen Wu                                                                                                                                                                    |
| EPI_ISL_408486 | hCoV-19/Jiangsu/IDC-JJ-002/2020         | Asia / China / Jiangsu / Pingtang                | 2020-01-11 | National Institute for Viral Disease Control and Prevention, China CDC                                                                                                                                                        | National Institute for Viral Disease Control & Prevention, China CDC                                                                                                                                                                                                                                            | Wengjie Tan, Xiangqiang Xu, Xiang Zhao, Wenling Wang, Peihua Niu, Roujian Lu, Yangshun Sun, Baoqing Huang, Li Zhao, Fei Ye, Wenbo Xu, George F. Gao, Guizhen Wu                                                                                                                                                                    |
| EPI_ISL_408487 | hCoV-19/Henan/IDC-HN-002/2020           | Asia / China / Henan / Zhengzhou                 | 2020-01-20 | National Institute for Viral Disease Control and Prevention, China CDC                                                                                                                                                        | National Institute for Viral Disease Control & Prevention, China CDC                                                                                                                                                                                                                                            | Wengjie Tan, Xiangqiang Xu, Xiang Zhao, Wenling Wang, Peihua Niu, Roujian Lu, Yangshun Sun, Baoqing Huang, Li Zhao, Fei Ye, Wenbo Xu, George F. Gao, Guizhen Wu                                                                                                                                                                    |
| EPI_ISL_408488 | hCoV-19/Jiangsu/IDC-JS-001/2020         | Asia / China / Jiangsu / Huai'an                 | 2020-01-19 | Department of Laboratory Medicine, National Taiwan University                                                                                                                                                                 | National Institute for Viral Disease Control & Prevention, China CDC                                                                                                                                                                                                                                            | Wengjie Tan, Xiangqiang Xu, Xiang Zhao, Wenling Wang, Peihua Niu, Roujian Lu, Yangshun Sun, Baoqing Huang, Li Zhao, Fei Ye, Wenbo Xu, George F. Gao, Guizhen Wu                                                                                                                                                                    |
| EPI_ISL_408489 | hCoV-19/Taiwan/NTU01/2020               | Asia / Taiwan / Taipei                           | 2020-01-31 | Shandong Provincial Center for Disease Control and Prevention                                                                                                                                                                 | Beijing Institute of Microbiology and Epidemiology                                                                                                                                                                                                                                                              | Wengjie Tan, Xiangqiang Xu, Xiang Zhao, Wenling Wang, Peihua Niu, Roujian Lu, Yangshun Sun, Baoqing Huang, Li Zhao, Fei Ye, Wenbo Xu, George F. Gao, Guizhen Wu                                                                                                                                                                    |
| EPI_ISL_412425 | hCoV-19/enn/Shandong/Y.H15/2020         | Asia / China / Shandong / Linyi                  | 2020-01-26 | Shandong Provincial Center for Disease Control and Prevention                                                                                                                                                                 | Beijing Institute of Microbiology and Epidemiology                                                                                                                                                                                                                                                              | Wengjie Tan, Xiangqiang Xu, Xiang Zhao, Wenling Wang, Peihua Niu, Roujian Lu, Yangshun Sun, Baoqing Huang, Li Zhao, Fei Ye, Wenbo Xu, George F. Gao, Guizhen Wu                                                                                                                                                                    |
| EPI_ISL_412426 | hCoV-19/enn/Shandong/Y.H15/2020         | Asia / China / Shandong / Linyi                  | 2020-01-26 | Shandong Provincial Center for Disease Control and Prevention                                                                                                                                                                 | Beijing Institute of Microbiology and Epidemiology                                                                                                                                                                                                                                                              | Wengjie Tan, Xiangqiang Xu, Xiang Zhao, Wenling Wang, Peihua Niu, Roujian Lu, Yangshun Sun, Baoqing Huang, Li Zhao, Fei Ye, Wenbo Xu, George F. Gao, Guizhen Wu                                                                                                                                                                    |
| EPI_ISL_412429 | hCoV-19/Jingzhou/HBCC-HB-01/2020        | Asia / China / Hubei / Jingzhou                  | 2020-01-08 | Jingzhou Center for Disease Control and Prevention                                                                                                                                                                            | Hubei Provincial Center for Disease Control and Prevention                                                                                                                                                                                                                                                      | Wengjie Tan, Xiangqiang Xu, Xiang Zhao, Wenling Wang, Peihua Niu, Roujian Lu, Yangshun Sun, Baoqing Huang, Li Zhao, Fei Ye, Wenbo Xu, George F. Gao, Guizhen Wu                                                                                                                                                                    |
| EPI_ISL_413213 | hCoV-19/Australia/NSW06/2020            | Oceania / Australia / New South Wales / Sydney   | 2020-02-29 | NSW Health, Westmead Hospital, University of Sydney                                                                                                                                                                           | NSW Health, Westmead Hospital, University of Sydney                                                                                                                                                                                                                                                             | Wengjie Tan, Xiangqiang Xu, Xiang Zhao, Wenling Wang, Peihua Niu, Roujian Lu, Yangshun Sun, Baoqing Huang, Li Zhao, Fei Ye, Wenbo Xu, George F. Gao, Guizhen Wu                                                                                                                                                                    |
| EPI_ISL_413214 | hCoV-19/Australia/NSW07/2020            | Oceania / Australia / New South Wales / Sydney   | 2020-02-29 | NSW Health, Westmead Hospital, University of Sydney                                                                                                                                                                           | NSW Health, Westmead Hospital, University of Sydney                                                                                                                                                                                                                                                             | Wengjie Tan, Xiangqiang Xu, Xiang Zhao, Wenling Wang, Peihua Niu, Roujian Lu, Yangshun Sun, Baoqing Huang, Li Zhao, Fei Ye, Wenbo Xu, George F. Gao, Guizhen Wu                                                                                                                                                                    |
| EPI_ISL_413219 | hCoV-19/Indonesia/19H0-N026/2020        | Asia / Indonesia / West Java / Indramayu         | 2020-03-02 | National Institute of Health Research and Development                                                                                                                                                                         | National Institute of Health Research and Development                                                                                                                                                                                                                                                           | Wengjie Tan, Xiangqiang Xu, Xiang Zhao, Wenling Wang, Peihua Niu, Roujian Lu, Yangshun Sun, Baoqing Huang, Li Zhao, Fei Ye, Wenbo Xu, George F. Gao, Guizhen Wu                                                                                                                                                                    |
| EPI_ISL_413304 | hCoV-19/Iran/Qom/2519A/2020             | Asia / Iran / Qom                                | 2020-02-09 | Iran National Influenza Center                                                                                                                                                                                                | Iran National Influenza Center                                                                                                                                                                                                                                                                                  | Wengjie Tan, Xiangqiang Xu, Xiang Zhao, Wenling Wang, Peihua Niu, Roujian Lu, Yangshun Sun, Baoqing Huang, Li Zhao, Fei Ye, Wenbo Xu, George F. Gao, Guizhen Wu                                                                                                                                                                    |
| EPI_ISL_414452 | hCoV-19/Italy/NA/AG0202/2020            | Europe / Germany / Munich                        | 2020-03-02 | Bundeswehr Institute of Microbiology                                                                                                                                                                                          | Bundeswehr Institute of Microbiology                                                                                                                                                                                                                                                                            | Wengjie Tan, Xiangqiang Xu, Xiang Zhao, Wenling Wang, Peihua Niu, Roujian Lu, Yangshun Sun, Baoqing Huang, Li Zhao, Fei Ye, Wenbo Xu, George F. Gao, Guizhen Wu                                                                                                                                                                    |
| EPI_ISL_414521 | hCoV-19/Germany/BavPat2/2020            | Europe / Germany / Munich                        | 2020-03-02 | Bundeswehr Institute of Microbiology                                                                                                                                                                                          | Bundeswehr Institute of Microbiology                                                                                                                                                                                                                                                                            | Wengjie Tan, Xiangqiang Xu, Xiang Zhao, Wenling Wang, Peihua Niu, Roujian Lu, Yangshun Sun, Baoqing Huang, Li Zhao, Fei Ye, Wenbo Xu, George F. Gao, Guizhen Wu                                                                                                                                                                    |
| EPI_ISL_414588 | hCoV-19/Iran/113-2020                   | Asia / Iran / Qom                                | 2020-02-19 | Pasteur Institute of Iran                                                                                                                                                                                                     | Pasteur Institute of Iran                                                                                                                                                                                                                                                                                       | Wengjie Tan, Xiangqiang Xu, Xiang Zhao, Wenling Wang, Peihua Niu, Roujian Lu, Yangshun Sun, Baoqing Huang, Li Zhao, Fei Ye, Wenbo Xu, George F. Gao, Guizhen Wu                                                                                                                                                                    |
| EPI_ISL_414577 | hCoV-19/Chile/Talca-1/2020              | South America / Chile / Talca                    | 2020-03-02 | Hospital de Talca, Chile                                                                                                                                                                                                      | Instituto de Salud Pública de Chile                                                                                                                                                                                                                                                                             | Wengjie Tan, Xiangqiang Xu, Xiang Zhao, Wenling Wang, Peihua Niu, Roujian Lu, Yangshun Sun, Baoqing Huang, Li Zhao, Fei Ye, Wenbo Xu, George F. Gao, Guizhen Wu                                                                                                                                                                    |
| EPI_ISL_414588 | hCoV-19/Spain/Valencia-3/2020           | Europe / Spain / Comunitat Valenciana / Valencia | 2020-03-05 | Servicio Microbiología, Hospital Clínico Universitario, Valencia                                                                                                                                                              | Sequencing and Bioinformatics Service and Molecular Epidemiology Research Group, FISABIO-Public Health                                                                                                                                                                                                          | Wengjie Tan, Xiangqiang Xu, Xiang Zhao, Wenling Wang, Peihua Niu, Roujian Lu, Yangshun Sun, Baoqing Huang, Li Zhao, Fei Ye, Wenbo Xu, George F. Gao, Guizhen Wu                                                                                                                                                                    |
| EPI_ISL_416028 | hCoV-19/Brazil/SPBR-07/2020             | South America / Brazil / Sao Paulo / Sao         | 2020-03-03 | National Influenza Center - Instituto Adolfo Lutz                                                                                                                                                                             | Instituto Adolfo Lutz, Interdisciplinary Procedures Center, Strategic Laboratory                                                                                                                                                                                                                                | Wengjie Tan, Xiangqiang Xu, Xiang Zhao, Wenling Wang, Peihua Niu, Roujian Lu, Yangshun Sun, Baoqing Huang, Li Zhao, Fei Ye, Wenbo Xu, George F. Gao, Guizhen Wu                                                                                                                                                                    |
| EPI_ISL_416029 | hCoV-19/Brazil/SPBR-08/2020             | South America / Brazil / Sao Paulo / Sao         | 2020-03-04 | Laboratório Fleury                                                                                                                                                                                                            | Instituto Adolfo Lutz, Interdisciplinary Procedures Center, Strategic Laboratory                                                                                                                                                                                                                                | Wengjie Tan, Xiangqiang Xu, Xiang Zhao, Wenling Wang, Peihua Niu, Roujian Lu, Yangshun Sun, Baoqing Huang, Li Zhao, Fei Ye, Wenbo Xu, George F. Gao, Guizhen Wu                                                                                                                                                                    |
| EPI_ISL_416031 | hCoV-19/Brazil/SPBR-09/2020             | South America / Brazil / Sao Paulo / Sao         | 2020-03-04 | National Influenza Center - Instituto Adolfo Lutz                                                                                                                                                                             | Instituto Adolfo Lutz, Interdisciplinary Procedures Center, Strategic Laboratory                                                                                                                                                                                                                                | Wengjie Tan, Xiangqiang Xu, Xiang Zhao, Wenling Wang, Peihua Niu, Roujian Lu, Yangshun Sun, Baoqing Huang, Li Zhao, Fei Ye, Wenbo Xu, George F. Gao, Guizhen Wu                                                                                                                                                                    |
| EPI_ISL_416032 | hCoV-19/Brazil/SPBR-10/2020             | South America / Brazil / Distrito Federal /      | 2020-03-04 | National Influenza Center - Instituto Adolfo Lutz                                                                                                                                                                             | Instituto Adolfo Lutz, Interdisciplinary Procedures Center, Strategic Laboratory                                                                                                                                                                                                                                | Wengjie Tan, Xiangqiang Xu, Xiang Zhao, Wenling Wang, Peihua Niu, Roujian Lu, Yangshun Sun, Baoqing Huang, Li Zhao, Fei Ye, Wenbo Xu, George F. Gao, Guizhen Wu                                                                                                                                                                    |
| EPI_ISL_416033 | hCoV-19/Brazil/SPBR-11/2020             | South America / Brazil / Sao Paulo / Sao         | 2020-03-03 | Hospital Israelita Albert Einstein                                                                                                                                                                                            | Instituto Adolfo Lutz, Interdisciplinary Procedures Center, Strategic Laboratory                                                                                                                                                                                                                                | Wengjie Tan, Xiangqiang Xu, Xiang Zhao, Wenling Wang, Peihua Niu, Roujian Lu, Yangshun Sun, Baoqing Huang, Li Zhao, Fei Ye, Wenbo Xu, George F. Gao, Guizhen Wu                                                                                                                                                                    |
| EPI_ISL_416034 | hCoV-19/Brazil/SPBR-12/2020             | South America / Brazil / Sao Paulo / Sao         | 2020-03-04 | Hospital Israelita Albert Einstein                                                                                                                                                                                            | Instituto Adolfo Lutz, Interdisciplinary Procedures Center, Strategic Laboratory                                                                                                                                                                                                                                | Wengjie Tan, Xiangqiang Xu, Xiang Zhao, Wenling Wang, Peihua Niu, Roujian Lu, Yangshun Sun, Baoqing Huang, Li Zhao, Fei Ye, Wenbo Xu, George F. Gao, Guizhen Wu                                                                                                                                                                    |
| EPI_ISL_416035 | hCoV-19/Brazil/SPBR-13/2020             | South America / Brazil / Sao Paulo / Sao         | 2020-03-05 | National Influenza Center - Instituto Adolfo Lutz                                                                                                                                                                             | Instituto Adolfo Lutz, Interdisciplinary Procedures Center, Strategic Laboratory                                                                                                                                                                                                                                | Wengjie Tan, Xiangqiang Xu, Xiang Zhao, Wenling Wang, Peihua Niu, Roujian Lu, Yangshun Sun, Baoqing Huang, Li Zhao, Fei Ye, Wenbo Xu, George F. Gao, Guizhen Wu                                                                                                                                                                    |
| EPI_ISL_416036 | hCoV-19/Brazil/SPBR-14/2020             | South America / Brazil / Sao Paulo / Sao         | 2020-03-05 | National Influenza Center - Instituto Adolfo Lutz                                                                                                                                                                             | Instituto Adolfo Lutz, Interdisciplinary Procedures Center, Strategic Laboratory                                                                                                                                                                                                                                | Wengjie Tan, Xiangqiang Xu, Xiang Zhao, Wenling Wang, Peihua Niu, Roujian Lu, Yangshun Sun, Baoqing Huang, Li Zhao, Fei Ye, Wenbo Xu, George F. Gao, Guizhen Wu                                                                                                                                                                    |
| EPI_ISL_416042 | hCoV-19/Hangzhou/ZJU-02/2020            | Asia / China / Hangzhou                          | 2020-01-26 | State Key Laboratory for Diagnosis and Treatment of Infectious Diseases, National Clinical Research Center for Infectious Diseases, First Affiliated Hospital, Zhejiang University School of Medicine, Hangzhou, China 310003 | State Key Laboratory for Diagnosis and Treatment of Infectious Diseases, National Clinical Research Center for Infectious Diseases, First Affiliated Hospital, Zhejiang University School of Medicine, Hangzhou, China 310003                                                                                   | Wengjie Tan, Xiangqiang Xu, Xiang Zhao, Wenling Wang, Peihua Niu, Roujian Lu, Yangshun Sun, Baoqing Huang, Li Zhao, Fei Ye, Wenbo Xu, George F. Gao, Guizhen Wu                                                                                                                                                                    |
| EPI_ISL_416044 | hCoV-19/Hangzhou/ZJU-03/2020            | Asia / China / Hangzhou                          | 2020-01-25 | State Key Laboratory for Diagnosis and Treatment of Infectious Diseases, National Clinical Research Center for Infectious Diseases, First Affiliated Hospital, Zhejiang University School of Medicine, Hangzhou, China 310003 | State Key Laboratory for Diagnosis and Treatment of Infectious Diseases, National Clinical Research Center for Infectious Diseases, First Affiliated Hospital, Zhejiang University School of Medicine, Hangzhou, China 310003                                                                                   | Wengjie Tan, Xiangqiang Xu, Xiang Zhao, Wenling Wang, Peihua Niu, Roujian Lu, Yangshun Sun, Baoqing Huang, Li Zhao, Fei Ye, Wenbo Xu, George F. Gao, Guizhen Wu                                                                                                                                                                    |
| EPI_ISL_416046 | hCoV-19/Hangzhou/ZJU-04/2020            | Asia / China / Hangzhou                          | 2020-01-24 | State Key Laboratory for Diagnosis and Treatment of Infectious Diseases, National Clinical Research Center for Infectious Diseases, First Affiliated Hospital, Zhejiang University School of Medicine, Hangzhou, China 310003 | State Key Laboratory for Diagnosis and Treatment of Infectious Diseases, National Clinical Research Center for Infectious Diseases, First Affiliated Hospital, Zhejiang University School of Medicine, Hangzhou, China 310003                                                                                   | Wengjie Tan, Xiangqiang Xu, Xiang Zhao, Wenling Wang, Peihua Niu, Roujian Lu, Yangshun Sun, Baoqing Huang, Li Zhao, Fei Ye, Wenbo Xu, George F. Gao, Guizhen Wu                                                                                                                                                                    |
| EPI_ISL_416047 | hCoV-19/Hangzhou/ZJU-06/2020            | Asia / China / Hangzhou                          | 2020-02-02 | State Key Laboratory for Diagnosis and Treatment of Infectious Diseases, National Clinical Research Center for Infectious Diseases, First Affiliated Hospital, Zhejiang University School of Medicine, Hangzhou, China 310003 | State Key Laboratory for Diagnosis and Treatment of Infectious Diseases, National Clinical Research Center for Infectious Diseases, First Affiliated Hospital, Zhejiang University School of Medicine, Hangzhou, China 310003                                                                                   | Wengjie Tan, Xiangqiang Xu, Xiang Zhao, Wenling Wang, Peihua Niu, Roujian Lu, Yangshun Sun, Baoqing Huang, Li Zhao, Fei Ye, Wenbo Xu, George F. Gao, Guizhen Wu                                                                                                                                                                    |
| EPI_ISL_416029 | hCoV-19/Malaysia/MKAK-CL-2020-5045/2020 | Asia / Malaysia / Selangor                       | 2020-01-24 | National Public Health Laboratory                                                                                                                                                                                             | Malaysia Genome Institute                                                                                                                                                                                                                                                                                       | Wengjie Tan, Xiangqiang Xu, Xiang Zhao, Wenling Wang, Peihua Niu, Roujian Lu, Yangshun Sun, Baoqing Huang, Li Zhao, Fei Ye, Wenbo Xu, George F. Gao, Guizhen Wu                                                                                                                                                                    |
| EPI_ISL_416066 | hCoV-19/Malaysia/MKAK-CL-2020-5047/2020 | Asia / Malaysia / Selangor                       | 2020-01-24 | National Public Health Laboratory                                                                                                                                                                                             | Malaysia Genome Institute                                                                                                                                                                                                                                                                                       | Wengjie Tan, Xiangqiang Xu, Xiang Zhao, Wenling Wang, Peihua Niu, Roujian Lu, Yangshun Sun, Baoqing Huang, Li Zhao, Fei Ye, Wenbo Xu, George F. Gao, Guizhen Wu                                                                                                                                                                    |
| EPI_ISL_416084 | hCoV-19/Malaysia/MKAK-CL-2020-5049/2020 | Asia / Malaysia / Selangor                       | 2020-01-24 | National Public Health Laboratory                                                                                                                                                                                             | Malaysia Genome Institute                                                                                                                                                                                                                                                                                       | Wengjie Tan, Xiangqiang Xu, Xiang Zhao, Wenling Wang, Peihua Niu, Roujian Lu, Yangshun Sun, Baoqing Huang, Li Zhao, Fei Ye, Wenbo Xu, George F. Gao, Guizhen Wu                                                                                                                                                                    |

|                |                                         |                                        |            |                                                                                                                                                                                                                                                                      |                                                                                                                             |                                                                                                                                                                                                                                                                                                                                                                                                                                                                          |
|----------------|-----------------------------------------|----------------------------------------|------------|----------------------------------------------------------------------------------------------------------------------------------------------------------------------------------------------------------------------------------------------------------------------|-----------------------------------------------------------------------------------------------------------------------------|--------------------------------------------------------------------------------------------------------------------------------------------------------------------------------------------------------------------------------------------------------------------------------------------------------------------------------------------------------------------------------------------------------------------------------------------------------------------------|
| EPI_ISL_416885 | hCoV-19/Malaysia/MKAK-CL-2020-5096/2020 | Asia / Malaysia / Selangor             | 2020-01-30 | National Public Health Laboratory                                                                                                                                                                                                                                    | Malaysia Genome Institute                                                                                                   | Mohd Noor Mat Isa, Imi Suhayu Sapian, Yusaf Muhammad Nor, Nurhazreen Md Iqbal, Mohd Faizal Abu Bakar, Enrica Kaim, Stanislav Sogor, Sil Norani Othman, Ahmad, Nor Afza Johari, Norazmah Tajudin, Norrizka Mohamad Noordin, W Afiza W Mohd Arifin, Rehan Shuhada Abu Bakar, Yu Ke Chem, Selvanesan Sengot, Hari Mat Hussin, Shahar Hasham Zainal Ariffin                                                                                                                  |
| EPI_ISL_416886 | hCoV-19/Malaysia/MKAK-CL-2020-6430/2020 | Asia / Malaysia / Selangor             | 2020-02-04 | National Public Health Laboratory                                                                                                                                                                                                                                    | Malaysia Genome Institute                                                                                                   | Mohd Noor Mat Isa, Imi Suhayu Sapian, Yusaf Muhammad Nor, Nurhazreen Md Iqbal, Mohd Faizal Abu Bakar, Enrica Kaim, Stanislav Sogor, Sil Norani Othman, Ahmad, Nor Afza Johari, Norazmah Tajudin, Norrizka Mohamad Noordin, W Afiza W Mohd Arifin, Rehan Shuhada Abu Bakar, Yu Ke Chem, Selvanesan Sengot, Hari Mat Hussin, Shahar Hasham Zainal Ariffin                                                                                                                  |
| EPI_ISL_417333 | hCoV-19/France/Lyon_06042/2020          | Europe / France / ARA                  | 2020-03-04 | Institut des Agents Infectieux (IAI), Hospices Civils de Lyon                                                                                                                                                                                                        | CNR Virus des Infections Respiratoires - France SUD                                                                         | Antonin Bal, Gregory Destras, Gwendolynne Burfin, Solenne Brun, Carine Moustaud, Raphaële Lamy, Alexandre Gaymard, Maude Bouscambert-Duchamp, Florence Morfin-Sherpa, Marine Valette, Laurence Jossel, Bruno Lina                                                                                                                                                                                                                                                        |
| EPI_ISL_417334 | hCoV-19/France/Lyon_06059/2020          | Europe / France / ARA                  | 2020-03-04 | Institut des Agents Infectieux (IAI), Hospices Civils de Lyon                                                                                                                                                                                                        | CNR Virus des Infections Respiratoires - France SUD                                                                         | Antonin Bal, Gregory Destras, Gwendolynne Burfin, Solenne Brun, Carine Moustaud, Raphaële Lamy, Alexandre Gaymard, Maude Bouscambert-Duchamp, Florence Morfin-Sherpa, Marine Valette, Laurence Jossel, Bruno Lina                                                                                                                                                                                                                                                        |
| EPI_ISL_417335 | hCoV-19/France/Lyon_06573/2020          | Europe / France / ARA                  | 2020-03-06 | Institut des Agents Infectieux (IAI), Hospices Civils de Lyon                                                                                                                                                                                                        | CNR Virus des Infections Respiratoires - France SUD                                                                         | Antonin Bal, Gregory Destras, Gwendolynne Burfin, Solenne Brun, Carine Moustaud, Raphaële Lamy, Alexandre Gaymard, Maude Bouscambert-Duchamp, Florence Morfin-Sherpa, Marine Valette, Laurence Jossel, Bruno Lina                                                                                                                                                                                                                                                        |
| EPI_ISL_417336 | hCoV-19/France/Lyon_0668/2020           | Europe / France / ARA                  | 2020-03-06 | Institut des Agents Infectieux (IAI), Hospices Civils de Lyon                                                                                                                                                                                                        | CNR Virus des Infections Respiratoires - France SUD                                                                         | Antonin Bal, Gregory Destras, Gwendolynne Burfin, Solenne Brun, Carine Moustaud, Raphaële Lamy, Alexandre Gaymard, Maude Bouscambert-Duchamp, Florence Morfin-Sherpa, Marine Valette, Laurence Jossel, Bruno Lina                                                                                                                                                                                                                                                        |
| EPI_ISL_417337 | hCoV-19/France/Lyon_06625/2020          | Europe / France / ARA                  | 2020-03-07 | Institut des Agents Infectieux (IAI), Hospices Civils de Lyon                                                                                                                                                                                                        | CNR Virus des Infections Respiratoires - France SUD                                                                         | Antonin Bal, Gregory Destras, Gwendolynne Burfin, Solenne Brun, Carine Moustaud, Raphaële Lamy, Alexandre Gaymard, Maude Bouscambert-Duchamp, Florence Morfin-Sherpa, Marine Valette, Laurence Jossel, Bruno Lina                                                                                                                                                                                                                                                        |
| EPI_ISL_417339 | hCoV-19/France/Lyon_06820/2020          | Europe / France / ARA                  | 2020-03-08 | Institut des Agents Infectieux (IAI), Hospices Civils de Lyon                                                                                                                                                                                                        | CNR Virus des Infections Respiratoires - France SUD                                                                         | Antonin Bal, Gregory Destras, Gwendolynne Burfin, Solenne Brun, Carine Moustaud, Raphaële Lamy, Alexandre Gaymard, Maude Bouscambert-Duchamp, Florence Morfin-Sherpa, Marine Valette, Laurence Jossel, Bruno Lina                                                                                                                                                                                                                                                        |
| EPI_ISL_417413 | hCoV-19/Turkey/6244-Ankara/1034/2020    | Europe / Turkey                        | 2020-03-17 | Ministry of Health Turkey                                                                                                                                                                                                                                            | Ministry of Health Turkey                                                                                                   | Patma Bayraktar Ayşe Başak Altay, Yasemin Cogun, Gülay Korkmaz, Selma Kılıç                                                                                                                                                                                                                                                                                                                                                                                              |
| EPI_ISL_417419 | hCoV-19/Italy/FVG-ICGEB_55/2020         | Europe / Italy / Friuli Venezia Giulia | 2020-03-01 | ARGO Open Lab Platform for Genome sequencing                                                                                                                                                                                                                         | Department of Microbiology Li Ka Shing Faculty of Medicine The University of Hong Kong                                      | Lucasio D. Rajasekharan S, Dal Morego S, Segal L, D'Agaro P, Marcello A                                                                                                                                                                                                                                                                                                                                                                                                  |
| EPI_ISL_417441 | hCoV-19/Hong Kong/00M-PH-54/2020        | Asia / Hong Kong                       | 2020-01-22 | State Key Laboratory for Emerging Infectious Diseases Department of Microbiology Li Ka Shing Faculty of Medicine The University of Hong Kong                                                                                                                         | Department of Microbiology Li Ka Shing Faculty of Medicine The University of Hong Kong                                      | Pui Wang, Siu Yue, Shaodeng Deng, Bobo Wing-Yee Mok, Wenjun Song, Kwok-Yuen Yuen, Honglin Chen                                                                                                                                                                                                                                                                                                                                                                           |
| EPI_ISL_417491 | hCoV-19/Italy/UnivPM1/2020              | Europe / Italy / Marche                | 2020-03-03 | Virology Laboratory, Department of Biomedical Sciences and Public Health, University Politecnica delle Marche                                                                                                                                                        | Department of Biomedical Sciences and Public Health, University Politecnica delle Marche                                    | Bagnarelli P., Cucco S., Di Santis L., Menzo S., Alessandrini F., Onofri V., Turchi C.,                                                                                                                                                                                                                                                                                                                                                                                  |
| EPI_ISL_418623 | hCoV-19/Belgium/ULG-6732/2020           | Europe / Belgium / Liège               | 2020-03-14 | Department of Clinical Microbiology                                                                                                                                                                                                                                  | GIGA Medical Genomics                                                                                                       | Keith Durkin, Maria Artesi, Sébastien Bortems, Raphaël Boreux, Cécile Meex, Pierrette Meun, Marie-Pierre Hayette, Vincent Bours                                                                                                                                                                                                                                                                                                                                          |
| EPI_ISL_418624 | hCoV-19/Belgium/ULG-6972/2020           | Europe / Belgium / Liège               | 2020-03-15 | Department of Clinical Microbiology                                                                                                                                                                                                                                  | GIGA Medical Genomics                                                                                                       | Keith Durkin, Maria Artesi, Sébastien Bortems, Raphaël Boreux, Cécile Meex, Pierrette Meun, Marie-Pierre Hayette, Vincent Bours                                                                                                                                                                                                                                                                                                                                          |
| EPI_ISL_418633 | hCoV-19/Belgium/ULG-7626/2020           | Europe / Belgium / Liège               | 2020-03-17 | Department of Clinical Microbiology                                                                                                                                                                                                                                  | GIGA Medical Genomics                                                                                                       | Keith Durkin, Maria Artesi, Sébastien Bortems, Raphaël Boreux, Cécile Meex, Pierrette Meun, Marie-Pierre Hayette, Vincent Bours                                                                                                                                                                                                                                                                                                                                          |
| EPI_ISL_418643 | hCoV-19/Belgium/ULG-8715/2020           | Europe / Belgium / Liège               | 2020-03-19 | Department of Clinical Microbiology                                                                                                                                                                                                                                  | GIGA Medical Genomics                                                                                                       | Keith Durkin, Maria Artesi, Sébastien Bortems, Raphaël Boreux, Cécile Meex, Pierrette Meun, Marie-Pierre Hayette, Vincent Bours                                                                                                                                                                                                                                                                                                                                          |
| EPI_ISL_418644 | hCoV-19/Belgium/ULG-8808/2020           | Europe / Belgium / Liège               | 2020-03-19 | Department of Clinical Microbiology                                                                                                                                                                                                                                  | GIGA Medical Genomics                                                                                                       | Keith Durkin, Maria Artesi, Sébastien Bortems, Raphaël Boreux, Cécile Meex, Pierrette Meun, Marie-Pierre Hayette, Vincent Bours                                                                                                                                                                                                                                                                                                                                          |
| EPI_ISL_418645 | hCoV-19/Belgium/ULG-9558/2020           | Europe / Belgium / Liège               | 2020-03-21 | Department of Clinical Microbiology                                                                                                                                                                                                                                  | GIGA Medical Genomics                                                                                                       | Keith Durkin, Maria Artesi, Sébastien Bortems, Raphaël Boreux, Cécile Meex, Pierrette Meun, Marie-Pierre Hayette, Vincent Bours                                                                                                                                                                                                                                                                                                                                          |
| EPI_ISL_418646 | hCoV-19/Belgium/ULG-9572/2020           | Europe / Belgium / Liège               | 2020-03-21 | Department of Clinical Microbiology                                                                                                                                                                                                                                  | GIGA Medical Genomics                                                                                                       | Keith Durkin, Maria Artesi, Sébastien Bortems, Raphaël Boreux, Cécile Meex, Pierrette Meun, Marie-Pierre Hayette, Vincent Bours                                                                                                                                                                                                                                                                                                                                          |
| EPI_ISL_418647 | hCoV-19/Belgium/ULG-9617/2020           | Europe / Belgium / Liège               | 2020-03-22 | Department of Clinical Microbiology                                                                                                                                                                                                                                  | GIGA Medical Genomics                                                                                                       | Keith Durkin, Maria Artesi, Sébastien Bortems, Raphaël Boreux, Cécile Meex, Pierrette Meun, Marie-Pierre Hayette, Vincent Bours                                                                                                                                                                                                                                                                                                                                          |
| EPI_ISL_418648 | hCoV-19/Belgium/ULG-9618/2020           | Europe / Belgium / Liège               | 2020-03-22 | Department of Clinical Microbiology                                                                                                                                                                                                                                  | GIGA Medical Genomics                                                                                                       | Keith Durkin, Maria Artesi, Sébastien Bortems, Raphaël Boreux, Cécile Meex, Pierrette Meun, Marie-Pierre Hayette, Vincent Bours                                                                                                                                                                                                                                                                                                                                          |
| EPI_ISL_418649 | hCoV-19/Belgium/ULG-9619/2020           | Europe / Belgium / Liège               | 2020-03-22 | Department of Clinical Microbiology                                                                                                                                                                                                                                  | GIGA Medical Genomics                                                                                                       | Keith Durkin, Maria Artesi, Sébastien Bortems, Raphaël Boreux, Cécile Meex, Pierrette Meun, Marie-Pierre Hayette, Vincent Bours                                                                                                                                                                                                                                                                                                                                          |
| EPI_ISL_418650 | hCoV-19/Belgium/ULG-9620/2020           | Europe / Belgium / Liège               | 2020-03-22 | Department of Clinical Microbiology                                                                                                                                                                                                                                  | GIGA Medical Genomics                                                                                                       | Keith Durkin, Maria Artesi, Sébastien Bortems, Raphaël Boreux, Cécile Meex, Pierrette Meun, Marie-Pierre Hayette, Vincent Bours                                                                                                                                                                                                                                                                                                                                          |
| EPI_ISL_418651 | hCoV-19/Belgium/ULG-9634/2020           | Europe / Belgium / Liège               | 2020-03-22 | Department of Clinical Microbiology                                                                                                                                                                                                                                  | GIGA Medical Genomics                                                                                                       | Keith Durkin, Maria Artesi, Sébastien Bortems, Raphaël Boreux, Cécile Meex, Pierrette Meun, Marie-Pierre Hayette, Vincent Bours                                                                                                                                                                                                                                                                                                                                          |
| EPI_ISL_418652 | hCoV-19/Belgium/ULG-9641/2020           | Europe / Belgium / Liège               | 2020-03-22 | Department of Clinical Microbiology                                                                                                                                                                                                                                  | GIGA Medical Genomics                                                                                                       | Keith Durkin, Maria Artesi, Sébastien Bortems, Raphaël Boreux, Cécile Meex, Pierrette Meun, Marie-Pierre Hayette, Vincent Bours                                                                                                                                                                                                                                                                                                                                          |
| EPI_ISL_418658 | hCoV-19/Belgium/ULG-9719/2020           | Europe / Belgium / Liège               | 2020-03-22 | Department of Clinical Microbiology                                                                                                                                                                                                                                  | GIGA Medical Genomics                                                                                                       | Keith Durkin, Maria Artesi, Sébastien Bortems, Raphaël Boreux, Cécile Meex, Pierrette Meun, Marie-Pierre Hayette, Vincent Bours                                                                                                                                                                                                                                                                                                                                          |
| EPI_ISL_418659 | hCoV-19/Belgium/ULG-9725/2020           | Europe / Belgium / Liège               | 2020-03-22 | Department of Clinical Microbiology                                                                                                                                                                                                                                  | GIGA Medical Genomics                                                                                                       | Keith Durkin, Maria Artesi, Sébastien Bortems, Raphaël Boreux, Cécile Meex, Pierrette Meun, Marie-Pierre Hayette, Vincent Bours                                                                                                                                                                                                                                                                                                                                          |
| EPI_ISL_418660 | hCoV-19/Belgium/ULG-9732/2020           | Europe / Belgium / Liège               | 2020-03-22 | Department of Clinical Microbiology                                                                                                                                                                                                                                  | GIGA Medical Genomics                                                                                                       | Keith Durkin, Maria Artesi, Sébastien Bortems, Raphaël Boreux, Cécile Meex, Pierrette Meun, Marie-Pierre Hayette, Vincent Bours                                                                                                                                                                                                                                                                                                                                          |
| EPI_ISL_418662 | hCoV-19/Belgium/ULG-9738/2020           | Europe / Belgium / Liège               | 2020-03-22 | Department of Clinical Microbiology                                                                                                                                                                                                                                  | GIGA Medical Genomics                                                                                                       | Keith Durkin, Maria Artesi, Sébastien Bortems, Raphaël Boreux, Cécile Meex, Pierrette Meun, Marie-Pierre Hayette, Vincent Bours                                                                                                                                                                                                                                                                                                                                          |
| EPI_ISL_418664 | hCoV-19/Belgium/ULG-9741/2020           | Europe / Belgium / Liège               | 2020-03-22 | Department of Clinical Microbiology                                                                                                                                                                                                                                  | GIGA Medical Genomics                                                                                                       | Keith Durkin, Maria Artesi, Sébastien Bortems, Raphaël Boreux, Cécile Meex, Pierrette Meun, Marie-Pierre Hayette, Vincent Bours                                                                                                                                                                                                                                                                                                                                          |
| EPI_ISL_418665 | hCoV-19/Belgium/ULG-9742/2020           | Europe / Belgium / Liège               | 2020-03-22 | Department of Clinical Microbiology                                                                                                                                                                                                                                  | GIGA Medical Genomics                                                                                                       | Keith Durkin, Maria Artesi, Sébastien Bortems, Raphaël Boreux, Cécile Meex, Pierrette Meun, Marie-Pierre Hayette, Vincent Bours                                                                                                                                                                                                                                                                                                                                          |
| EPI_ISL_418666 | hCoV-19/Belgium/ULG-9751/2020           | Europe / Belgium / Liège               | 2020-03-22 | Department of Clinical Microbiology                                                                                                                                                                                                                                  | GIGA Medical Genomics                                                                                                       | Keith Durkin, Maria Artesi, Sébastien Bortems, Raphaël Boreux, Cécile Meex, Pierrette Meun, Marie-Pierre Hayette, Vincent Bours                                                                                                                                                                                                                                                                                                                                          |
| EPI_ISL_418990 | hCoV-19/Hangzhou/ZJU-019/2020           | Asia / China / Hangzhou                | 2020-02-03 | Department of Clinical Microbiology<br>State Key Laboratory for Diagnosis and Treatment of Infectious Diseases, National Clinical Research Center for Infectious Diseases, First Affiliated Hospital, Zhejiang University School of Medicine, Hangzhou, China 310003 | Department of Health Technology and Informatics, Faculty of Health and Social Science, The Hong Kong Polytechnic University | Hangzhou Wu, Nanping Wu, Zhao Jiang, Xiangyun Lu, Lirang Cheng, Fumin Liu, Zhigang Wu, Hailuo Wu, Changzhong Jin, Min Zheng, Lanjuan Li                                                                                                                                                                                                                                                                                                                                  |
| EPI_ISL_418991 | hCoV-19/Hangzhou/ZJU-011/2020           | Asia / China / Hangzhou                | 2020-02-04 | Department of Clinical Microbiology<br>State Key Laboratory for Diagnosis and Treatment of Infectious Diseases, National Clinical Research Center for Infectious Diseases, First Affiliated Hospital, Zhejiang University School of Medicine, Hangzhou, China 310003 | Department of Health Technology and Informatics, Faculty of Health and Social Science, The Hong Kong Polytechnic University | Hangzhou Wu, Nanping Wu, Zhao Jiang, Xiangyun Lu, Lirang Cheng, Fumin Liu, Zhigang Wu, Hailuo Wu, Changzhong Jin, Min Zheng, Lanjuan Li                                                                                                                                                                                                                                                                                                                                  |
| EPI_ISL_419213 | hCoV-19/Hong Kong/HKPU38-3001/2020      | Asia / Hong Kong                       | 2020-02-09 | Department of Clinical Pathology, Pamela Youde Nethersole Eastern Hospital                                                                                                                                                                                           | Department of Health Technology and Informatics, Faculty of Health and Social Science, The Hong Kong Polytechnic University | Kenneth Siu-Sing LEUNG, Timothy Ting-Leung NG, Alan Ka-Lun WU, Miranda Chong-Yee YAU, Hui-Yin LAO, Ming-Pan CHOI, Kingley King-Gee TAM, Lam-Kwong LEE, Barry Kin-Chung WONG, Alex Yai-Man HO, Kam-Tong YIP, Kwok-Chung LUNG, Raymond Wai-To LIU, Eugene Yui-Kung TSO, Wai-Shing LEUNG, Man-Chun CHAN, Yui-Yung NG, Ki-Man SIN, Kitty Sau-Chun FUNG, Sandy Ka-Yee CHAU, Wing-Kin TO, Tak-Lun QUE, David Ho-Keung SHUM, Shea Ping YIP, Wing Cheong YAM, Gilman Ki-Hang SIU |
| EPI_ISL_419214 | hCoV-19/Hong Kong/HKPU39-3001/2020      | Asia / Hong Kong                       | 2020-02-10 | Department of Clinical Pathology, Pamela Youde Nethersole Eastern Hospital                                                                                                                                                                                           | Department of Health Technology and Informatics, Faculty of Health and Social Science, The Hong Kong Polytechnic University | Kenneth Siu-Sing LEUNG, Timothy Ting-Leung NG, Alan Ka-Lun WU, Miranda Chong-Yee YAU, Hui-Yin LAO, Ming-Pan CHOI, Kingley King-Gee TAM, Lam-Kwong LEE, Barry Kin-Chung WONG, Alex Yai-Man HO, Kam-Tong YIP, Kwok-Chung LUNG, Raymond Wai-To LIU, Eugene Yui-Kung TSO, Wai-Shing LEUNG, Man-Chun CHAN, Yui-Yung NG, Ki-Man SIN, Kitty Sau-Chun FUNG, Sandy Ka-Yee CHAU, Wing-Kin TO, Tak-Lun QUE, David Ho-Keung SHUM, Shea Ping YIP, Wing Cheong YAM, Gilman Ki-Hang SIU |
| EPI_ISL_419215 | hCoV-19/Hong Kong/HKPU40-2801/2020      | Asia / Hong Kong                       | 2020-02-10 | Department of Clinical Pathology, Pamela Youde Nethersole Eastern Hospital                                                                                                                                                                                           | Department of Health Technology and Informatics, Faculty of Health and Social Science, The Hong Kong Polytechnic University | Kenneth Siu-Sing LEUNG, Timothy Ting-Leung NG, Alan Ka-Lun WU, Miranda Chong-Yee YAU, Hui-Yin LAO, Ming-Pan CHOI, Kingley King-Gee TAM, Lam-Kwong LEE, Barry Kin-Chung WONG, Alex Yai-Man HO, Kam-Tong YIP, Kwok-Chung LUNG, Raymond Wai-To LIU, Eugene Yui-Kung TSO, Wai-Shing LEUNG, Man-Chun CHAN, Yui-Yung NG, Ki-Man SIN, Kitty Sau-Chun FUNG, Sandy Ka-Yee CHAU, Wing-Kin TO, Tak-Lun QUE, David Ho-Keung SHUM, Shea Ping YIP, Wing Cheong YAM, Gilman Ki-Hang SIU |
| EPI_ISL_419216 | hCoV-19/Hong Kong/HKPU41-0802/2020      | Asia / Hong Kong                       | 2020-02-10 | Department of Clinical Pathology, Pamela Youde Nethersole Eastern Hospital                                                                                                                                                                                           | Department of Health Technology and Informatics, Faculty of Health and Social Science, The Hong Kong Polytechnic University | Kenneth Siu-Sing LEUNG, Timothy Ting-Leung NG, Alan Ka-Lun WU, Miranda Chong-Yee YAU, Hui-Yin LAO, Ming-Pan CHOI, Kingley King-Gee TAM, Lam-Kwong LEE, Barry Kin-Chung WONG, Alex Yai-Man HO, Kam-Tong YIP, Kwok-Chung LUNG, Raymond Wai-To LIU, Eugene Yui-Kung TSO, Wai-Shing LEUNG, Man-Chun CHAN, Yui-Yung NG, Ki-Man SIN, Kitty Sau-Chun FUNG, Sandy Ka-Yee CHAU, Wing-Kin TO, Tak-Lun QUE, David Ho-Keung SHUM, Shea Ping YIP, Wing Cheong YAM, Gilman Ki-Hang SIU |
| EPI_ISL_419217 | hCoV-19/Hong Kong/HKPU42-0302/2020      | Asia / Hong Kong                       | 2020-02-10 | Department of Pathology, Princess Margaret Hospital                                                                                                                                                                                                                  | Department of Health Technology and Informatics, Faculty of Health and Social Science, The Hong Kong Polytechnic University | Kenneth Siu-Sing LEUNG, Timothy Ting-Leung NG, Alan Ka-Lun WU, Miranda Chong-Yee YAU, Hui-Yin LAO, Ming-Pan CHOI, Kingley King-Gee TAM, Lam-Kwong LEE, Barry Kin-Chung WONG, Alex Yai-Man HO, Kam-Tong YIP, Kwok-Chung LUNG, Raymond Wai-To LIU, Eugene Yui-Kung TSO, Wai-Shing LEUNG, Man-Chun CHAN, Yui-Yung NG, Ki-Man SIN, Kitty Sau-Chun FUNG, Sandy Ka-Yee CHAU, Wing-Kin TO, Tak-Lun QUE, David Ho-Keung SHUM, Shea Ping YIP, Wing Cheong YAM, Gilman Ki-Hang SIU |
| EPI_ISL_419218 | hCoV-19/Hong Kong/HKPU43-0202/2020      | Asia / Hong Kong                       | 2020-02-10 | Department of Clinical Pathology, Pamela Youde Nethersole Eastern Hospital                                                                                                                                                                                           | Department of Health Technology and Informatics, Faculty of Health and Social Science, The Hong Kong Polytechnic University | Kenneth Siu-Sing LEUNG, Timothy Ting-Leung NG, Alan Ka-Lun WU, Miranda Chong-Yee YAU, Hui-Yin LAO, Ming-Pan CHOI, Kingley King-Gee TAM, Lam-Kwong LEE, Barry Kin-Chung WONG, Alex Yai-Man HO, Kam-Tong YIP, Kwok-Chung LUNG, Raymond Wai-To LIU, Eugene Yui-Kung TSO, Wai-Shing LEUNG, Man-Chun CHAN, Yui-Yung NG, Ki-Man SIN, Kitty Sau-Chun FUNG, Sandy Ka-Yee CHAU, Wing-Kin TO, Tak-Lun QUE, David Ho-Keung SHUM, Shea Ping YIP, Wing Cheong YAM, Gilman Ki-Hang SIU |
| EPI_ISL_419219 | hCoV-19/Hong Kong/HKPU44-0102/2020      | Asia / Hong Kong                       | 2020-02-10 | Department of Clinical Pathology, Pamela Youde Nethersole Eastern Hospital                                                                                                                                                                                           | Department of Health Technology and Informatics, Faculty of Health and Social Science, The Hong Kong Polytechnic University | Kenneth Siu-Sing LEUNG, Timothy Ting-Leung NG, Alan Ka-Lun WU, Miranda Chong-Yee YAU, Hui-Yin LAO, Ming-Pan CHOI, Kingley King-Gee TAM, Lam-Kwong LEE, Barry Kin-Chung WONG, Alex Yai-Man HO, Kam-Tong YIP, Kwok-Chung LUNG, Raymond Wai-To LIU, Eugene Yui-Kung TSO, Wai-Shing LEUNG, Man-Chun CHAN, Yui-Yung NG, Ki-Man SIN, Kitty Sau-Chun FUNG, Sandy Ka-Yee CHAU, Wing-Kin TO, Tak-Lun QUE, David Ho-Keung SHUM, Shea Ping YIP, Wing Cheong YAM, Gilman Ki-Hang SIU |
| EPI_ISL_419221 | hCoV-19/Hong Kong/HKPU45-0502/2020      | Asia / Hong Kong                       | 2020-02-11 | Department of Pathology, United Christian Hospital                                                                                                                                                                                                                   | Department of Health Technology and Informatics, Faculty of Health and Social Science, The Hong Kong Polytechnic University | Kenneth Siu-Sing LEUNG, Timothy Ting-Leung NG, Alan Ka-Lun WU, Miranda Chong-Yee YAU, Hui-Yin LAO, Ming-Pan CHOI, Kingley King-Gee TAM, Lam-Kwong LEE, Barry Kin-Chung WONG, Alex Yai-Man HO, Kam-Tong YIP, Kwok-Chung LUNG, Raymond Wai-To LIU, Eugene Yui-Kung TSO, Wai-Shing LEUNG, Man-Chun CHAN, Yui-Yung NG, Ki-Man SIN, Kitty Sau-Chun FUNG, Sandy Ka-Yee CHAU, Wing-Kin TO, Tak-Lun QUE, David Ho-Keung SHUM, Shea Ping YIP, Wing Cheong YAM, Gilman Ki-Hang SIU |
| EPI_ISL_419222 | hCoV-19/Hong Kong/HKPU46-0202/2020      | Asia / Hong Kong                       | 2020-02-11 | Department of Pathology, Princess Margaret Hospital                                                                                                                                                                                                                  | Department of Health Technology and Informatics, Faculty of Health and Social Science, The Hong Kong Polytechnic University | Kenneth Siu-Sing LEUNG, Timothy Ting-Leung NG, Alan Ka-Lun WU, Miranda Chong-Yee YAU, Hui-Yin LAO, Ming-Pan CHOI, Kingley King-Gee TAM, Lam-Kwong LEE, Barry Kin-Chung WONG, Alex Yai-Man HO, Kam-Tong YIP, Kwok-Chung LUNG, Raymond Wai-To LIU, Eugene Yui-Kung TSO, Wai-Shing LEUNG, Man-Chun CHAN, Yui-Yung NG, Ki-Man SIN, Kitty Sau-Chun FUNG, Sandy Ka-Yee CHAU, Wing-Kin TO, Tak-Lun QUE, David Ho-Keung SHUM, Shea Ping YIP, Wing Cheong YAM, Gilman Ki-Hang SIU |
| EPI_ISL_419223 | hCoV-19/Hong Kong/HKPU49-3001/2020      | Asia / Hong Kong                       | 2020-02-11 | Department of Pathology, Princess Margaret Hospital                                                                                                                                                                                                                  | Department of Health Technology and Informatics, Faculty of Health and Social Science, The Hong Kong Polytechnic University | Kenneth Siu-Sing LEUNG, Timothy Ting-Leung NG, Alan Ka-Lun WU, Miranda Chong-Yee YAU, Hui-Yin LAO, Ming-Pan CHOI, Kingley King-Gee TAM, Lam-Kwong LEE, Barry Kin-Chung WONG, Alex Yai-Man HO, Kam-Tong YIP, Kwok-Chung LUNG, Raymond Wai-To LIU, Eugene Yui-Kung TSO, Wai-Shing LEUNG, Man-Chun CHAN, Yui-Yung NG, Ki-Man SIN, Kitty Sau-Chun FUNG, Sandy Ka-Yee CHAU, Wing-Kin TO, Tak-Lun QUE, David Ho-Keung SHUM, Shea Ping YIP, Wing Cheong YAM, Gilman Ki-Hang SIU |
| EPI_ISL_419224 | hCoV-19/Hong Kong/HKPU52-3101/2020      | Asia / Hong Kong                       | 2020-02-13 | Department of Clinical Pathology, Pamela Youde Nethersole Eastern Hospital                                                                                                                                                                                           | Department of Health Technology and Informatics, Faculty of Health and Social Science, The Hong Kong Polytechnic University | Kenneth Siu-Sing LEUNG, Timothy Ting-Leung NG, Alan Ka-Lun WU, Miranda Chong-Yee YAU, Hui-Yin LAO, Ming-Pan CHOI, Kingley King-Gee TAM, Lam-Kwong LEE, Barry Kin-Chung WONG, Alex Yai-Man HO, Kam-Tong YIP, Kwok-Chung LUNG, Raymond Wai-To LIU, Eugene Yui-Kung TSO, Wai-Shing LEUNG, Man-Chun CHAN, Yui-Yung NG, Ki-Man SIN, Kitty Sau-Chun FUNG, Sandy Ka-Yee CHAU, Wing-Kin TO, Tak-Lun QUE, David Ho-Keung SHUM, Shea Ping YIP, Wing Cheong YAM, Gilman Ki-Hang SIU |
| EPI_ISL_419225 | hCoV-19/Hong Kong/HKPU53-0802/2020      | Asia / Hong Kong                       | 2020-02-13 | Department of Clinical Pathology, Pamela Youde Nethersole Eastern Hospital                                                                                                                                                                                           | Department of Health Technology and Informatics, Faculty of Health and Social Science, The Hong Kong Polytechnic University | Kenneth Siu-Sing LEUNG, Timothy Ting-Leung NG, Alan Ka-Lun WU, Miranda Chong-Yee YAU, Hui-Yin LAO, Ming-Pan CHOI, Kingley King-Gee TAM, Lam-Kwong LEE, Barry Kin-Chung WONG, Alex Yai-Man HO, Kam-Tong YIP, Kwok-Chung LUNG, Raymond Wai-To LIU, Eugene Yui-Kung TSO, Wai-Shing LEUNG, Man-Chun CHAN, Yui-Yung NG, Ki-Man SIN, Kitty Sau-Chun FUNG, Sandy Ka-Yee CHAU, Wing-Kin TO, Tak-Lun QUE, David Ho-Keung SHUM, Shea Ping YIP, Wing Cheong YAM, Gilman Ki-Hang SIU |
| EPI_ISL_419226 | hCoV-19/Hong Kong/HKPU54-0302/2020      | Asia / Hong Kong                       | 2020-02-13 | Department of Clinical Pathology, Pamela Youde Nethersole Eastern Hospital                                                                                                                                                                                           | Department of Health Technology and Informatics, Faculty of Health and Social Science, The Hong Kong Polytechnic University | Kenneth Siu-Sing LEUNG, Timothy Ting-Leung NG, Alan Ka-Lun WU, Miranda Chong-Yee YAU, Hui-Yin LAO, Ming-Pan CHOI, Kingley King-Gee TAM, Lam-Kwong LEE, Barry Kin-Chung WONG, Alex Yai-Man HO, Kam-Tong YIP, Kwok-Chung LUNG, Raymond Wai-To LIU, Eugene Yui-Kung TSO, Wai-Shing LEUNG, Man-Chun CHAN, Yui-Yung NG, Ki-Man SIN, Kitty Sau-Chun FUNG, Sandy Ka-Yee CHAU, Wing-Kin TO, Tak-Lun QUE, David Ho-Keung SHUM, Shea Ping YIP, Wing Cheong YAM, Gilman Ki-Hang SIU |

|                |                                     |                                 |                                                                                               |                                                                                                                             |                                                                                                                                                                                                                                                                                                                                                                                             |
|----------------|-------------------------------------|---------------------------------|-----------------------------------------------------------------------------------------------|-----------------------------------------------------------------------------------------------------------------------------|---------------------------------------------------------------------------------------------------------------------------------------------------------------------------------------------------------------------------------------------------------------------------------------------------------------------------------------------------------------------------------------------|
| EPI_ISL_419227 | hCoV-19/Hong Kong/HKPU67-0702/2020  | Asia / Hong Kong                | Department of Clinical Pathology, Pamela Youde Nethersole Eastern Hospital                    | Department of Health Technology and Informatics, Faculty of Health and Social Science, The Hong Kong Polytechnic University | Yee YAU, Hu-Yin LAO, Ming-Pan CHOI, Kingsley King-Gee TAM, Lam-Kwong LEE, Barry Kon-Chung WONG, Alex Yat-Man HO, Kam-Tong YIP, Keok-Chung LUNG, Raymond Wei-To LU, Eugene Yik-Keung TSO, Wai-Shing LEUNG, Man-Chun CHAN, Yuk-Yung NG, Ki-Man SIN, Kitty Sau-Chun FUNG, Sandy Ka-Yee CHAU, Wing-Kin To, Tak-Lun QUE, David Ho-Kwong SHUM, Shea Ping YIP, Wing-Cheng YAM, Gilman Kai-Hang SIU |
| EPI_ISL_419228 | hCoV-19/Hong Kong/HKPU60-0802/2020  | Asia / Hong Kong                | Department of Clinical Pathology, Pamela Youde Nethersole Eastern Hospital                    | Department of Health Technology and Informatics, Faculty of Health and Social Science, The Hong Kong Polytechnic University | Yee YAU, Hu-Yin LAO, Ming-Pan CHOI, Kingsley King-Gee TAM, Lam-Kwong LEE, Barry Kon-Chung WONG, Alex Yat-Man HO, Kam-Tong YIP, Keok-Chung LUNG, Raymond Wei-To LU, Eugene Yik-Keung TSO, Wai-Shing LEUNG, Man-Chun CHAN, Yuk-Yung NG, Ki-Man SIN, Kitty Sau-Chun FUNG, Sandy Ka-Yee CHAU, Wing-Kin To, Tak-Lun QUE, David Ho-Kwong SHUM, Shea Ping YIP, Wing-Cheng YAM, Gilman Kai-Hang SIU |
| EPI_ISL_419229 | hCoV-19/Hong Kong/HKPU61-10202/2020 | Asia / Hong Kong                | Department of Clinical Pathology, Pamela Youde Nethersole Eastern Hospital                    | Department of Health Technology and Informatics, Faculty of Health and Social Science, The Hong Kong Polytechnic University | Yee YAU, Hu-Yin LAO, Ming-Pan CHOI, Kingsley King-Gee TAM, Lam-Kwong LEE, Barry Kon-Chung WONG, Alex Yat-Man HO, Kam-Tong YIP, Keok-Chung LUNG, Raymond Wei-To LU, Eugene Yik-Keung TSO, Wai-Shing LEUNG, Man-Chun CHAN, Yuk-Yung NG, Ki-Man SIN, Kitty Sau-Chun FUNG, Sandy Ka-Yee CHAU, Wing-Kin To, Tak-Lun QUE, David Ho-Kwong SHUM, Shea Ping YIP, Wing-Cheng YAM, Gilman Kai-Hang SIU |
| EPI_ISL_419230 | hCoV-19/Spain/Andalusia021617/2020  | Europe / Spain / Andalusia      | Hospital Universitario Virgen de las Nieves                                                   | Instituto de Salud Carlos III                                                                                               | Iglesias-Caballero, M., Molinero Calamita, M., González-Eguaváliz, M., Camarero, S., Pozo, F., Casas, I., Jiménez, P., Jiménez, M., Zaballos, A., Morzón, S., Varona, S., Juliá, M., Cuesta, I., Sanbornateau, S.                                                                                                                                                                           |
| EPI_ISL_419231 | hCoV-19/Hong Kong/HKPU63-1402/2020  | Asia / Hong Kong                | Department of Clinical Pathology, Tuen Mun Hospital, 23 Tsing Chung Koon Road, Tuen Mun, N.T. | Department of Health Technology and Informatics, Faculty of Health and Social Science, The Hong Kong Polytechnic University | Yee YAU, Hu-Yin LAO, Ming-Pan CHOI, Kingsley King-Gee TAM, Lam-Kwong LEE, Barry Kon-Chung WONG, Alex Yat-Man HO, Kam-Tong YIP, Keok-Chung LUNG, Raymond Wei-To LU, Eugene Yik-Keung TSO, Wai-Shing LEUNG, Man-Chun CHAN, Yuk-Yung NG, Ki-Man SIN, Kitty Sau-Chun FUNG, Sandy Ka-Yee CHAU, Wing-Kin To, Tak-Lun QUE, David Ho-Kwong SHUM, Shea Ping YIP, Wing-Cheng YAM, Gilman Kai-Hang SIU |
| EPI_ISL_419232 | hCoV-19/Hong Kong/HKPU64-1202/2020  | Asia / Hong Kong                | Department of Clinical Pathology, Pamela Youde Nethersole Eastern Hospital                    | Department of Health Technology and Informatics, Faculty of Health and Social Science, The Hong Kong Polytechnic University | Yee YAU, Hu-Yin LAO, Ming-Pan CHOI, Kingsley King-Gee TAM, Lam-Kwong LEE, Barry Kon-Chung WONG, Alex Yat-Man HO, Kam-Tong YIP, Keok-Chung LUNG, Raymond Wei-To LU, Eugene Yik-Keung TSO, Wai-Shing LEUNG, Man-Chun CHAN, Yuk-Yung NG, Ki-Man SIN, Kitty Sau-Chun FUNG, Sandy Ka-Yee CHAU, Wing-Kin To, Tak-Lun QUE, David Ho-Kwong SHUM, Shea Ping YIP, Wing-Cheng YAM, Gilman Kai-Hang SIU |
| EPI_ISL_419233 | hCoV-19/Spain/Canarias201495/2020   | Europe / Spain / Canary Islands | Hospital Universitario de Canarias                                                            | Instituto de Salud Carlos III                                                                                               | Iglesias-Caballero, M., Molinero Calamita, M., González-Eguaváliz, M., Camarero, S., Pozo, F., Casas, I., Jiménez, P., Jiménez, M., Zaballos, A., Morzón, S., Varona, S., Juliá, M., Cuesta, I., Castro, B.                                                                                                                                                                                 |
| EPI_ISL_419234 | hCoV-19/Spain/LaRioja201575/2020    | Europe / Spain / LaRioja        | Hospital San Pedro                                                                            | Instituto de Salud Carlos III                                                                                               | Iglesias-Caballero, M., Molinero Calamita, M., González-Eguaváliz, M., Camarero, S., Pozo, F., Casas, I., Jiménez, P., Jiménez, M., Zaballos, A., Morzón, S., Varona, S., Juliá, M., Cuesta, I., Fernández, R.                                                                                                                                                                              |
| EPI_ISL_419235 | hCoV-19/Spain/Madrid201706/2020     | Europe / Spain / Madrid         | Fundacion Jimenez Diaz                                                                        | Instituto de Salud Carlos III                                                                                               | Iglesias-Caballero, M., Molinero Calamita, M., González-Eguaváliz, M., Camarero, S., Pozo, F., Casas, I., Jiménez, P., Jiménez, M., Zaballos, A., Morzón, S., Varona, S., Juliá, M., Cuesta, I., Fernández, R.                                                                                                                                                                              |
| EPI_ISL_419236 | hCoV-19/Spain/Madrid201709/2020     | Europe / Spain / Madrid         | Fundacion Jimenez Diaz                                                                        | Instituto de Salud Carlos III                                                                                               | Iglesias-Caballero, M., Molinero Calamita, M., González-Eguaváliz, M., Camarero, S., Pozo, F., Casas, I., Jiménez, P., Jiménez, M., Zaballos, A., Morzón, S., Varona, S., Juliá, M., Cuesta, I., Fernández, R.                                                                                                                                                                              |
| EPI_ISL_419237 | hCoV-19/Spain/Madrid201738/2020     | Europe / Spain / Madrid         | Fundacion Jimenez Diaz                                                                        | Instituto de Salud Carlos III                                                                                               | Iglesias-Caballero, M., Molinero Calamita, M., González-Eguaváliz, M., Camarero, S., Pozo, F., Casas, I., Jiménez, P., Jiménez, M., Zaballos, A., Morzón, S., Varona, S., Juliá, M., Cuesta, I., Fernández, R.                                                                                                                                                                              |
| EPI_ISL_419238 | hCoV-19/Spain/Pais Vasco201493/2020 | Europe / Spain / Basque Country | HOSPITAL DE CRUCES.                                                                           | Instituto de Salud Carlos III                                                                                               | Iglesias-Caballero, M., Molinero Calamita, M., González-Eguaváliz, M., Camarero, S., Pozo, F., Casas, I., Jiménez, P., Jiménez, M., Zaballos, A., Morzón, S., Varona, S., Juliá, M., Cuesta, I., Aranzamendi, M.                                                                                                                                                                            |
| EPI_ISL_419240 | hCoV-19/Spain/Pais Vasco201607/2020 | Europe / Spain / Basque Country | HOSPITAL TXAGORITXU                                                                           | Instituto de Salud Carlos III                                                                                               | Iglesias-Caballero, M., Molinero Calamita, M., González-Eguaváliz, M., Camarero, S., Pozo, F., Casas, I., Jiménez, P., Jiménez, M., Zaballos, A., Morzón, S., Varona, S., Juliá, M., Cuesta, I., Gómez, C.                                                                                                                                                                                  |
| EPI_ISL_419241 | hCoV-19/Hong Kong/HKPU65-1202/2020  | Asia / Hong Kong                | Department of Clinical Pathology, Pamela Youde Nethersole Eastern Hospital                    | Department of Health Technology and Informatics, Faculty of Health and Social Science, The Hong Kong Polytechnic University | Yee YAU, Hu-Yin LAO, Ming-Pan CHOI, Kingsley King-Gee TAM, Lam-Kwong LEE, Barry Kon-Chung WONG, Alex Yat-Man HO, Kam-Tong YIP, Keok-Chung LUNG, Raymond Wei-To LU, Eugene Yik-Keung TSO, Wai-Shing LEUNG, Man-Chun CHAN, Yuk-Yung NG, Ki-Man SIN, Kitty Sau-Chun FUNG, Sandy Ka-Yee CHAU, Wing-Kin To, Tak-Lun QUE, David Ho-Kwong SHUM, Shea Ping YIP, Wing-Cheng YAM, Gilman Kai-Hang SIU |
| EPI_ISL_419242 | hCoV-19/Hong Kong/HKPU66-2501/2020  | Asia / Hong Kong                | Department of Clinical Pathology, Tuen Mun Hospital                                           | Department of Health Technology and Informatics, Faculty of Health and Social Science, The Hong Kong Polytechnic University | Yee YAU, Hu-Yin LAO, Ming-Pan CHOI, Kingsley King-Gee TAM, Lam-Kwong LEE, Barry Kon-Chung WONG, Alex Yat-Man HO, Kam-Tong YIP, Keok-Chung LUNG, Raymond Wei-To LU, Eugene Yik-Keung TSO, Wai-Shing LEUNG, Man-Chun CHAN, Yuk-Yung NG, Ki-Man SIN, Kitty Sau-Chun FUNG, Sandy Ka-Yee CHAU, Wing-Kin To, Tak-Lun QUE, David Ho-Kwong SHUM, Shea Ping YIP, Wing-Cheng YAM, Gilman Kai-Hang SIU |
| EPI_ISL_419243 | hCoV-19/Hong Kong/HKPU70-1302/2020  | Asia / Hong Kong                | Department of Clinical Pathology, Pamela Youde Nethersole Eastern Hospital                    | Department of Health Technology and Informatics, Faculty of Health and Social Science, The Hong Kong Polytechnic University | Yee YAU, Hu-Yin LAO, Ming-Pan CHOI, Kingsley King-Gee TAM, Lam-Kwong LEE, Barry Kon-Chung WONG, Alex Yat-Man HO, Kam-Tong YIP, Keok-Chung LUNG, Raymond Wei-To LU, Eugene Yik-Keung TSO, Wai-Shing LEUNG, Man-Chun CHAN, Yuk-Yung NG, Ki-Man SIN, Kitty Sau-Chun FUNG, Sandy Ka-Yee CHAU, Wing-Kin To, Tak-Lun QUE, David Ho-Kwong SHUM, Shea Ping YIP, Wing-Cheng YAM, Gilman Kai-Hang SIU |
| EPI_ISL_419244 | hCoV-19/Hong Kong/HKPU73-0802/2020  | Asia / Hong Kong                | Department of Clinical Pathology, Pamela Youde Nethersole Eastern Hospital                    | Department of Health Technology and Informatics, Faculty of Health and Social Science, The Hong Kong Polytechnic University | Yee YAU, Hu-Yin LAO, Ming-Pan CHOI, Kingsley King-Gee TAM, Lam-Kwong LEE, Barry Kon-Chung WONG, Alex Yat-Man HO, Kam-Tong YIP, Keok-Chung LUNG, Raymond Wei-To LU, Eugene Yik-Keung TSO, Wai-Shing LEUNG, Man-Chun CHAN, Yuk-Yung NG, Ki-Man SIN, Kitty Sau-Chun FUNG, Sandy Ka-Yee CHAU, Wing-Kin To, Tak-Lun QUE, David Ho-Kwong SHUM, Shea Ping YIP, Wing-Cheng YAM, Gilman Kai-Hang SIU |
| EPI_ISL_419245 | hCoV-19/Hong Kong/HKPU74-1302/2020  | Asia / Hong Kong                | Department of Clinical Pathology, Pamela Youde Nethersole Eastern Hospital                    | Department of Health Technology and Informatics, Faculty of Health and Social Science, The Hong Kong Polytechnic University | Yee YAU, Hu-Yin LAO, Ming-Pan CHOI, Kingsley King-Gee TAM, Lam-Kwong LEE, Barry Kon-Chung WONG, Alex Yat-Man HO, Kam-Tong YIP, Keok-Chung LUNG, Raymond Wei-To LU, Eugene Yik-Keung TSO, Wai-Shing LEUNG, Man-Chun CHAN, Yuk-Yung NG, Ki-Man SIN, Kitty Sau-Chun FUNG, Sandy Ka-Yee CHAU, Wing-Kin To, Tak-Lun QUE, David Ho-Kwong SHUM, Shea Ping YIP, Wing-Cheng YAM, Gilman Kai-Hang SIU |
| EPI_ISL_419246 | hCoV-19/Hong Kong/HKPU76-0802/2020  | Asia / Hong Kong                | Department of Clinical Pathology, Pamela Youde Nethersole Eastern Hospital                    | Department of Health Technology and Informatics, Faculty of Health and Social Science, The Hong Kong Polytechnic University | Yee YAU, Hu-Yin LAO, Ming-Pan CHOI, Kingsley King-Gee TAM, Lam-Kwong LEE, Barry Kon-Chung WONG, Alex Yat-Man HO, Kam-Tong YIP, Keok-Chung LUNG, Raymond Wei-To LU, Eugene Yik-Keung TSO, Wai-Shing LEUNG, Man-Chun CHAN, Yuk-Yung NG, Ki-Man SIN, Kitty Sau-Chun FUNG, Sandy Ka-Yee CHAU, Wing-Kin To, Tak-Lun QUE, David Ho-Kwong SHUM, Shea Ping YIP, Wing-Cheng YAM, Gilman Kai-Hang SIU |

|                |                                        |                                                        |                                                                                                                                          |                                                                                                                                                                      |                                                                                                                                                                                                                                          |
|----------------|----------------------------------------|--------------------------------------------------------|------------------------------------------------------------------------------------------------------------------------------------------|----------------------------------------------------------------------------------------------------------------------------------------------------------------------|------------------------------------------------------------------------------------------------------------------------------------------------------------------------------------------------------------------------------------------|
| EPI_ISL_420049 | hCoV-19/France/HF2946/2020             | Europe / France / Hauts de France / Cor2020-03-19      | CH Compiegne Laboratoire de Biologie                                                                                                     | National Reference Center for Viruses of Respiratory Infections, Institut Pasteur, Paris                                                                             | Mélanie Albert, Marion Barbet, Sylvie Behilli, Méline Bizard, Angela Brisabane, Flora Donati, Elénie Simon-Lorène, Vincent Enouf, Maud Vanperne, Sylvie van der Werf, Raulin Olivia                                                      |
| EPI_ISL_420050 | hCoV-19/France/HF2946/2020             | Europe / France / Hauts de France / Cor2020-03-19      | CH Compiegne Laboratoire de Biologie                                                                                                     | National Reference Center for Viruses of Respiratory Infections, Institut Pasteur, Paris                                                                             | Mélanie Albert, Marion Barbet, Sylvie Behilli, Méline Bizard, Angela Brisabane, Flora Donati, Elénie Simon-Lorène, Vincent Enouf, Maud Vanperne, Sylvie van der Werf, Raulin Olivia                                                      |
| EPI_ISL_420051 | hCoV-19/France/IDF2989/2020            | Europe / France / Ile de France / Saint-TI2020-03-19   | Résidence Elzeux                                                                                                                         | National Reference Center for Viruses of Respiratory Infections, Institut Pasteur, Paris                                                                             | Mélanie Albert, Marion Barbet, Sylvie Behilli, Méline Bizard, Angela Brisabane, Flora Donati, Elénie Simon-Lorène, Vincent Enouf, Maud Vanperne, Sylvie van der Werf                                                                     |
| EPI_ISL_420052 | hCoV-19/France/IDF3026/2020            | Europe / France / Ile de France / Annerville2020-03-20 | Résidence les Marines                                                                                                                    | National Reference Center for Viruses of Respiratory Infections, Institut Pasteur, Paris                                                                             | Mélanie Albert, Marion Barbet, Sylvie Behilli, Méline Bizard, Angela Brisabane, Flora Donati, Elénie Simon-Lorène, Vincent Enouf, Maud Vanperne, Sylvie van der Werf                                                                     |
| EPI_ISL_420053 | hCoV-19/France/HF3036/2020             | Europe / France / Hauts de France / Cha2020-03-19      | CH Jean de Navarre Laboratoire de Biologie                                                                                               | National Reference Center for Viruses of Respiratory Infections, Institut Pasteur, Paris                                                                             | Mélanie Albert, Marion Barbet, Sylvie Behilli, Méline Bizard, Angela Brisabane, Flora Donati, Elénie Simon-Lorène, Vincent Enouf, Maud Vanperne, Sylvie van der Werf                                                                     |
| EPI_ISL_420054 | hCoV-19/France/IDF3040/2020            | Europe / France / Ile de France / Noisy le2020-03-20   | Séduite de maintenance                                                                                                                   | National Reference Center for Viruses of Respiratory Infections, Institut Pasteur, Paris                                                                             | Mélanie Albert, Marion Barbet, Sylvie Behilli, Méline Bizard, Angela Brisabane, Flora Donati, Elénie Simon-Lorène, Vincent Enouf, Maud Vanperne, Sylvie van der Werf                                                                     |
| EPI_ISL_420055 | hCoV-19/France/GE3067/2020             | Europe / France / Grand-Est / Spicheren2020-03-17      | Residences network                                                                                                                       | National Reference Center for Viruses of Respiratory Infections, Institut Pasteur, Paris                                                                             | Mélanie Albert, Marion Barbet, Sylvie Behilli, Méline Bizard, Angela Brisabane, Flora Donati, Elénie Simon-Lorène, Vincent Enouf, Maud Vanperne, Sylvie van der Werf, Raulin Olivia                                                      |
| EPI_ISL_420056 | hCoV-19/France/HF3136/2020             | Europe / France / Hauts de France / Cor2020-03-22      | CH Compiegne Laboratoire de Biologie                                                                                                     | National Reference Center for Viruses of Respiratory Infections, Institut Pasteur, Paris                                                                             | Mélanie Albert, Marion Barbet, Sylvie Behilli, Méline Bizard, Angela Brisabane, Flora Donati, Elénie Simon-Lorène, Vincent Enouf, Maud Vanperne, Sylvie van der Werf, Raulin Olivia                                                      |
| EPI_ISL_420057 | hCoV-19/France/HF3141/2020             | Europe / France / Hauts de France / Cor2020-03-22      | CH Compiegne Laboratoire de Biologie                                                                                                     | National Reference Center for Viruses of Respiratory Infections, Institut Pasteur, Paris                                                                             | Mélanie Albert, Marion Barbet, Sylvie Behilli, Méline Bizard, Angela Brisabane, Flora Donati, Elénie Simon-Lorène, Vincent Enouf, Maud Vanperne, Sylvie van der Werf, Raulin Olivia                                                      |
| EPI_ISL_420058 | hCoV-19/France/IDF3163/2020            | Europe / France / Ile de France / Longjumeau2020-03-20 | Service de Biologie Médicale - BP 125                                                                                                    | National Reference Center for Viruses of Respiratory Infections, Institut Pasteur, Paris                                                                             | Mélanie Albert, Marion Barbet, Sylvie Behilli, Méline Bizard, Angela Brisabane, Flora Donati, Elénie Simon-Lorène, Vincent Enouf, Maud Vanperne, Sylvie van der Werf, Christine Lambert                                                  |
| EPI_ISL_420059 | hCoV-19/France/IDF3165/2020            | Europe / France / Ile de France / Longjumeau2020-03-21 | Service de Biologie Médicale - BP 125                                                                                                    | National Reference Center for Viruses of Respiratory Infections, Institut Pasteur, Paris                                                                             | Mélanie Albert, Marion Barbet, Sylvie Behilli, Méline Bizard, Angela Brisabane, Flora Donati, Elénie Simon-Lorène, Vincent Enouf, Maud Vanperne, Sylvie van der Werf, Christine Lambert                                                  |
| EPI_ISL_420060 | hCoV-19/France/IDF3170/2020            | Europe / France / Ile de France / Longjumeau2020-03-20 | Service de Biologie Médicale - BP 125                                                                                                    | National Reference Center for Viruses of Respiratory Infections, Institut Pasteur, Paris                                                                             | Mélanie Albert, Marion Barbet, Sylvie Behilli, Méline Bizard, Angela Brisabane, Flora Donati, Elénie Simon-Lorène, Vincent Enouf, Maud Vanperne, Sylvie van der Werf, Christine Lambert                                                  |
| EPI_ISL_420061 | hCoV-19/France/IDF3212/2020            | Europe / France / Ile de France / Paris 2020-03-23     | CMP                                                                                                                                      | National Reference Center for Viruses of Respiratory Infections, Institut Pasteur, Paris                                                                             | Mélanie Albert, Marion Barbet, Sylvie Behilli, Méline Bizard, Angela Brisabane, Flora Donati, Elénie Simon-Lorène, Vincent Enouf, Maud Vanperne, Sylvie van der Werf                                                                     |
| EPI_ISL_420062 | hCoV-19/France/IDF3218/2020            | Europe / France / Ile de France / Longjumeau2020-03-22 | Service de Biologie Médicale - BP 125                                                                                                    | National Reference Center for Viruses of Respiratory Infections, Institut Pasteur, Paris                                                                             | Mélanie Albert, Marion Barbet, Sylvie Behilli, Méline Bizard, Angela Brisabane, Flora Donati, Elénie Simon-Lorène, Vincent Enouf, Maud Vanperne, Sylvie van der Werf                                                                     |
| EPI_ISL_420063 | hCoV-19/France/IDF3230/2020            | Europe / France / Ile de France / Juvisy+J2020-03-22   | Labo BM - Site de Juvisy - Hôpital Général                                                                                               | National Reference Center for Viruses of Respiratory Infections, Institut Pasteur, Paris                                                                             | Mélanie Albert, Marion Barbet, Sylvie Behilli, Méline Bizard, Angela Brisabane, Flora Donati, Elénie Simon-Lorène, Vincent Enouf, Maud Vanperne, Sylvie van der Werf, Christine Lambert                                                  |
| EPI_ISL_420064 | hCoV-19/France/IDF3235/2020            | Europe / France / Ile de France / Longjumeau2020-03-23 | Service de Biologie Médicale - BP 125                                                                                                    | National Reference Center for Viruses of Respiratory Infections, Institut Pasteur, Paris                                                                             | Mélanie Albert, Marion Barbet, Sylvie Behilli, Méline Bizard, Angela Brisabane, Flora Donati, Elénie Simon-Lorène, Vincent Enouf, Maud Vanperne, Sylvie van der Werf, Christine Lambert                                                  |
| EPI_ISL_420065 | hCoV-19/Senegal/306/2020               | Africa / Senegal / Dakar 2020-03-17                    | Institut Pasteur Dakar                                                                                                                   | Institut Pasteur de Dakar                                                                                                                                            | Ndongo Dia, Moussa Moïse Diagne, Mamadou Diop, Oummane Faye, Amadou Alpha Sall                                                                                                                                                           |
| EPI_ISL_420070 | hCoV-19/Senegal/315/2020               | Africa / Senegal / Dakar 2020-03-17                    | Institut Pasteur Dakar                                                                                                                   | Institut Pasteur de Dakar                                                                                                                                            | Ndongo Dia, Moussa Moïse Diagne, Mamadou Diop, Oummane Faye, Amadou Alpha Sall                                                                                                                                                           |
| EPI_ISL_420071 | hCoV-19/Senegal/328/2020               | Africa / Senegal / Mbour 2020-03-17                    | Institut Pasteur Mbour                                                                                                                   | Institut Pasteur de Dakar                                                                                                                                            | Ndongo Dia, Moussa Moïse Diagne, Mamadou Diop, Oummane Faye, Amadou Alpha Sall                                                                                                                                                           |
| EPI_ISL_420072 | hCoV-19/Senegal/370/2020               | Africa / Senegal / Mbour 2020-03-18                    | Institut Pasteur Dakar                                                                                                                   | Institut Pasteur de Dakar                                                                                                                                            | Ndongo Dia, Moussa Moïse Diagne, Mamadou Diop, Oummane Faye, Amadou Alpha Sall                                                                                                                                                           |
| EPI_ISL_420073 | hCoV-19/Senegal/382/2020               | Africa / Senegal / Dakar 2020-03-19                    | Institut Pasteur Dakar                                                                                                                   | Institut Pasteur de Dakar                                                                                                                                            | Ndongo Dia, Moussa Moïse Diagne, Mamadou Diop, Oummane Faye, Amadou Alpha Sall                                                                                                                                                           |
| EPI_ISL_420074 | hCoV-19/Senegal/600/2020               | Africa / Senegal / St-Louis 2020-03-20                 | Institut Pasteur Dakar                                                                                                                   | Institut Pasteur de Dakar                                                                                                                                            | Ndongo Dia, Moussa Moïse Diagne, Mamadou Diop, Oummane Faye, Amadou Alpha Sall                                                                                                                                                           |
| EPI_ISL_420075 | hCoV-19/Senegal/610/2020               | Africa / Senegal / Dakar 2020-03-20                    | Institut Pasteur Dakar                                                                                                                   | Institut Pasteur de Dakar                                                                                                                                            | Ndongo Dia, Moussa Moïse Diagne, Mamadou Diop, Oummane Faye, Amadou Alpha Sall                                                                                                                                                           |
| EPI_ISL_420076 | hCoV-19/Senegal/611/2020               | Africa / Senegal / Dakar 2020-03-20                    | Institut Pasteur Dakar                                                                                                                   | Institut Pasteur de Dakar                                                                                                                                            | Ndongo Dia, Moussa Moïse Diagne, Mamadou Diop, Oummane Faye, Amadou Alpha Sall                                                                                                                                                           |
| EPI_ISL_420077 | hCoV-19/Senegal/618/2020               | Africa / Senegal / Dakar 2020-03-20                    | Institut Pasteur Dakar                                                                                                                   | Institut Pasteur de Dakar                                                                                                                                            | Ndongo Dia, Moussa Moïse Diagne, Mamadou Diop, Oummane Faye, Amadou Alpha Sall                                                                                                                                                           |
| EPI_ISL_420078 | hCoV-19/Senegal/620/2020               | Africa / Senegal / Thies 2020-03-20                    | Institut Pasteur Dakar                                                                                                                   | Institut Pasteur de Dakar                                                                                                                                            | Ndongo Dia, Moussa Moïse Diagne, Mamadou Diop, Oummane Faye, Amadou Alpha Sall                                                                                                                                                           |
| EPI_ISL_420079 | hCoV-19/Senegal/640/2020               | Africa / Senegal / Dakar 2020-03-20                    | Institut Pasteur Dakar                                                                                                                   | Institut Pasteur de Dakar                                                                                                                                            | Ndongo Dia, Moussa Moïse Diagne, Mamadou Diop, Oummane Faye, Amadou Alpha Sall                                                                                                                                                           |
| EPI_ISL_420080 | hCoV-19/Russia/SPPetersburg_R3992/2020 | Africa / Russia / Saint Petersburg 2020-03-18          | WHO National Influenza Centre Russian Federation                                                                                         | WHO National Influenza Centre Russian Federation                                                                                                                     | Andrey Komissarov, Artem Fadeev, Anna Ivanova, Daria Danilenko                                                                                                                                                                           |
| EPI_ISL_420081 | hCoV-19/Russia/SPPetersburg_R3997/2020 | Africa / Russia / Saint Petersburg 2020-03-18          | WHO National Influenza Centre Russian Federation                                                                                         | WHO National Influenza Centre Russian Federation                                                                                                                     | Andrey Komissarov, Artem Fadeev, Anna Ivanova, Daria Danilenko                                                                                                                                                                           |
| EPI_ISL_420455 | hCoV-19/Hong Kong/HKU102_2802/2020     | Asia / Hong Kong 2020-03-04                            | Department of Clinical Pathology, Pamela Youde Nethersole Eastern Hospital                                                               | Department of Health and Social Sciences, The Hong Kong Polytechnic University                                                                                       | Raymond Wai To LU, Eugene Yuk-Kung TSO, Wai-Shing LEUNG, Man-Chun CHAN, Yik-Yung NG, Kit-Man SIN, Kitty Sze-Chun FUNG, Sandy Ka-Yee CHAU, Wing-Kin TO, Suk-Lun CHE, David Ho-Kung SHUM, Shea Ping YIP, Wong Cheong YAM, Gohm K, Hang Siu |
| EPI_ISL_421005 | hCoV-19/France/HF2306/2020             | Europe / France / Hauts de France / Cor2020-03-11      | CH Compiegne Laboratoire de Biologie                                                                                                     | National Reference Center for Viruses of Respiratory Infections, Institut Pasteur, Paris                                                                             | Mélanie Albert, Marion Barbet, Sylvie Behilli, Méline Bizard, Angela Brisabane, Flora Donati, Elénie Simon-Lorène, Vincent Enouf, Maud Vanperne, Sylvie van der Werf, Raulin Olivia                                                      |
| EPI_ISL_421501 | hCoV-19/France/IDF2359/2020            | Europe / France / Ile de France / Longjumeau2020-03-12 | Service de Biologie Médicale - BP 125                                                                                                    | National Reference Center for Viruses of Respiratory Infections, Institut Pasteur, Paris                                                                             | Mélanie Albert, Marion Barbet, Sylvie Behilli, Méline Bizard, Angela Brisabane, Flora Donati, Elénie Simon-Lorène, Vincent Enouf, Maud Vanperne, Sylvie van der Werf, Christine Lambert                                                  |
| EPI_ISL_421502 | hCoV-19/France/IDF2412/2020            | Europe / France / Ile de France / Saint O2020-03-12    | Parc des Dames                                                                                                                           | National Reference Center for Viruses of Respiratory Infections, Institut Pasteur, Paris                                                                             | Mélanie Albert, Marion Barbet, Sylvie Behilli, Méline Bizard, Angela Brisabane, Flora Donati, Elénie Simon-Lorène, Vincent Enouf, Maud Vanperne, Sylvie van der Werf                                                                     |
| EPI_ISL_421503 | hCoV-19/France/IDF2414/2020            | Europe / France / Ile de France / Saint O2020-03-12    | Parc des Dames                                                                                                                           | National Reference Center for Viruses of Respiratory Infections, Institut Pasteur, Paris                                                                             | Mélanie Albert, Marion Barbet, Sylvie Behilli, Méline Bizard, Angela Brisabane, Flora Donati, Elénie Simon-Lorène, Vincent Enouf, Maud Vanperne, Sylvie van der Werf                                                                     |
| EPI_ISL_421504 | hCoV-19/France/IDF2536/2020            | Europe / France / Ile de France / Longjumeau2020-03-14 | Service de Biologie Médicale - BP 125                                                                                                    | National Reference Center for Viruses of Respiratory Infections, Institut Pasteur, Paris                                                                             | Mélanie Albert, Marion Barbet, Sylvie Behilli, Méline Bizard, Angela Brisabane, Flora Donati, Elénie Simon-Lorène, Vincent Enouf, Maud Vanperne, Sylvie van der Werf, Christine Lambert                                                  |
| EPI_ISL_421505 | hCoV-19/France/IDF2548/2020            | Europe / France / Ile de France / Longjumeau2020-03-15 | Service de Biologie Médicale - BP 125                                                                                                    | National Reference Center for Viruses of Respiratory Infections, Institut Pasteur, Paris                                                                             | Mélanie Albert, Marion Barbet, Sylvie Behilli, Méline Bizard, Angela Brisabane, Flora Donati, Elénie Simon-Lorène, Vincent Enouf, Maud Vanperne, Sylvie van der Werf, Christine Lambert                                                  |
| EPI_ISL_421506 | hCoV-19/France/IDF2336/2020            | Europe / France / Ile de France / Longjumeau2020-03-21 | Service de Biologie Médicale - BP 125                                                                                                    | National Reference Center for Viruses of Respiratory Infections, Institut Pasteur, Paris                                                                             | Mélanie Albert, Marion Barbet, Sylvie Behilli, Méline Bizard, Angela Brisabane, Flora Donati, Elénie Simon-Lorène, Vincent Enouf, Maud Vanperne, Sylvie van der Werf, Christine Lambert                                                  |
| EPI_ISL_421507 | hCoV-19/France/IDF2374/2020            | Europe / France / Ile de France / Seine-P2020-03-23    | Le Château de Seine-Port                                                                                                                 | National Reference Center for Viruses of Respiratory Infections, Institut Pasteur, Paris                                                                             | Mélanie Albert, Marion Barbet, Sylvie Behilli, Méline Bizard, Angela Brisabane, Flora Donati, Elénie Simon-Lorène, Vincent Enouf, Maud Vanperne, Sylvie van der Werf                                                                     |
| EPI_ISL_421508 | hCoV-19/France/IDF3276/2020            | Europe / France / Ile de France / Seine-P2020-03-23    | Le Château de Seine-Port                                                                                                                 | National Reference Center for Viruses of Respiratory Infections, Institut Pasteur, Paris                                                                             | Mélanie Albert, Marion Barbet, Sylvie Behilli, Méline Bizard, Angela Brisabane, Flora Donati, Elénie Simon-Lorène, Vincent Enouf, Maud Vanperne, Sylvie van der Werf                                                                     |
| EPI_ISL_421509 | hCoV-19/France/HF3290/2020             | Europe / France / Hauts de France / Cor2020-03-23      | CH Compiegne Laboratoire de Biologie                                                                                                     | National Reference Center for Viruses of Respiratory Infections, Institut Pasteur, Paris                                                                             | Mélanie Albert, Marion Barbet, Sylvie Behilli, Méline Bizard, Angela Brisabane, Flora Donati, Elénie Simon-Lorène, Vincent Enouf, Maud Vanperne, Sylvie van der Werf, Raulin Olivia                                                      |
| EPI_ISL_421510 | hCoV-19/France/HF3293/2020             | Europe / France / Hauts de France / Cor2020-03-23      | CH Compiegne Laboratoire de Biologie                                                                                                     | National Reference Center for Viruses of Respiratory Infections, Institut Pasteur, Paris                                                                             | Mélanie Albert, Marion Barbet, Sylvie Behilli, Méline Bizard, Angela Brisabane, Flora Donati, Elénie Simon-Lorène, Vincent Enouf, Maud Vanperne, Sylvie van der Werf, Raulin Olivia                                                      |
| EPI_ISL_421511 | hCoV-19/France/HF3295/2020             | Europe / France / Hauts de France / Cor2020-03-23      | CH Compiegne Laboratoire de Biologie                                                                                                     | National Reference Center for Viruses of Respiratory Infections, Institut Pasteur, Paris                                                                             | Mélanie Albert, Marion Barbet, Sylvie Behilli, Méline Bizard, Angela Brisabane, Flora Donati, Elénie Simon-Lorène, Vincent Enouf, Maud Vanperne, Sylvie van der Werf, Raulin Olivia                                                      |
| EPI_ISL_421512 | hCoV-19/France/IDF3324/2020            | Europe / France / Ile de France / Longjumeau2020-03-23 | Service de Biologie Médicale - BP 125                                                                                                    | National Reference Center for Viruses of Respiratory Infections, Institut Pasteur, Paris                                                                             | Mélanie Albert, Marion Barbet, Sylvie Behilli, Méline Bizard, Angela Brisabane, Flora Donati, Elénie Simon-Lorène, Vincent Enouf, Maud Vanperne, Sylvie van der Werf, Christine Lambert                                                  |
| EPI_ISL_421513 | hCoV-19/France/IDF3345/2020            | Europe / France / Ile de France / Orsay 2020-03-23     | Service de Biologie clinique                                                                                                             | National Reference Center for Viruses of Respiratory Infections, Institut Pasteur, Paris                                                                             | Mélanie Albert, Marion Barbet, Sylvie Behilli, Méline Bizard, Angela Brisabane, Flora Donati, Elénie Simon-Lorène, Vincent Enouf, Maud Vanperne, Sylvie van der Werf, Christine Lambert                                                  |
| EPI_ISL_421514 | hCoV-19/France/CLV3365/2020            | Europe / France / Centre - Val de Loire+2020-03-20     | Séduite network                                                                                                                          | National Reference Center for Viruses of Respiratory Infections, Institut Pasteur, Paris                                                                             | Mélanie Albert, Marion Barbet, Sylvie Behilli, Méline Bizard, Angela Brisabane, Flora Donati, Elénie Simon-Lorène, Vincent Enouf, Maud Vanperne, Sylvie van der Werf                                                                     |
| EPI_ISL_421517 | hCoV-19/South Africa/KRISP-02/2020     | Africa / South Africa / KZN 2020-03-23                 | Molecular Diagnostic Services and Flowpath                                                                                               | KRISP: KZN Research Innovation and Sequencing Platform                                                                                                               | Glendanih J. Pillay S, Ngqogo S, Samundner K, Lessells R, Chumkangaba B, Delorche K, Tegally H, Wilkinson E, de Oliveira T                                                                                                               |
| EPI_ISL_421574 | hCoV-19/South Africa/KRISP-07/2020     | Africa / South Africa / KZN 2020-04-01                 | Molecular Diagnostic Services                                                                                                            | KRISP: KZN Research Innovation and Sequencing Platform                                                                                                               | Glendanih J. Pillay S, Ngqogo S, Samundner K, Lessells R, Chumkangaba B, Delorche K, Tegally H, Wilkinson E, de Oliveira T                                                                                                               |
| EPI_ISL_426364 | hCoV-19/Mexico/CDMX-INCMNSZ_04/2020    | North America / Mexico / Mexico City 2020-03-12        | Instituto Nacional de Ciencias Medicas y Nutricion Salvador Zubiran                                                                      | Instituto Nacional de Ciencias Medicas y Nutricion                                                                                                                   | Francisco Pulido, Carlos F. Ariza                                                                                                                                                                                                        |
| EPI_ISL_426580 | hCoV-19/Brazil/DFBR-0001/2020          | South America / Brazil / Distrito Federal / 2020-03-13 | Instituto Satin                                                                                                                          | Laboratory of Virology                                                                                                                                               | Fernando T. Melo, Gustavo Barra, Ticiane H. Santa Rita, Pedro G. Mesquita, Iliana Andrade, Taisyne Negada, Bergmann M. Ribeiro                                                                                                           |
| EPI_ISL_428346 | hCoV-19/Turkey/GLAB-COV13/2020         | Europe / Turkey / Istanbul 2020-04-17                  | Genomic Laboratory (GLAB) Corgitlab of Health Directorate of Istanbul and Istanbul Technical University                                  | Genomic Laboratory (GLAB), Istanbul Technical University                                                                                                             | Ilker Karacan, Tugba Kizilozga Akgun, Bugra Agoglu, Gizem Altun, Jale Yildiz, Betül Kozak, Elifnaz Celik, Arzu Ivern, Yasemin Kenet Demirek, Ozdem Akgun Dogan, Metlay Arslan, Levni Doganay, Gizem Diner Doganay                        |
| EPI_ISL_428347 | hCoV-19/France/IDF3384/2020            | Europe / France / Ile de France / Longjumeau2020-03-23 | Service de Biologie Médicale - BP 125                                                                                                    | National Reference Center for Viruses of Respiratory Infections, Institut Pasteur, Paris                                                                             | Mélanie Albert, Marion Barbet, Sylvie Behilli, Méline Bizard, Angela Brisabane, Flora Donati, Elénie Simon-Lorène, Vincent Enouf, Maud Vanperne, Sylvie van der Werf                                                                     |
| EPI_ISL_428348 | hCoV-19/France/GE3372/2020             | Europe / France / Grand-est / Gondrecourt2020-03-20    | Maison de Santé du Val d'Ornois                                                                                                          | National Reference Center for Viruses of Respiratory Infections, Institut Pasteur, Paris                                                                             | Mélanie Albert, Marion Barbet, Sylvie Behilli, Méline Bizard, Angela Brisabane, Flora Donati, Elénie Simon-Lorène, Vincent Enouf, Maud Vanperne, Sylvie van der Werf                                                                     |
| EPI_ISL_428349 | hCoV-19/France/IDF3386/2020            | Europe / France / Ile de France / Longjumeau2020-03-23 | Service de Biologie Médicale - BP 125                                                                                                    | National Reference Center for Viruses of Respiratory Infections, Institut Pasteur, Paris                                                                             | Mélanie Albert, Marion Barbet, Sylvie Behilli, Méline Bizard, Angela Brisabane, Flora Donati, Elénie Simon-Lorène, Vincent Enouf, Maud Vanperne, Sylvie van der Werf                                                                     |
| EPI_ISL_428350 | hCoV-19/France/HF3419/2020             | Europe / France / Hauts de France / Cha2020-03-24      | CH Jean de Navarre Laboratoire de Biologie                                                                                               | National Reference Center for Viruses of Respiratory Infections, Institut Pasteur, Paris                                                                             | Mélanie Albert, Marion Barbet, Sylvie Behilli, Méline Bizard, Angela Brisabane, Flora Donati, Elénie Simon-Lorène, Vincent Enouf, Maud Vanperne, Sylvie van der Werf                                                                     |
| EPI_ISL_428351 | hCoV-19/France/IDF3509/2020            | Europe / France / Ile de France / Orsay 2020-03-24     | GH Nord Essonne Service de Biologie clinique                                                                                             | National Reference Center for Viruses of Respiratory Infections, Institut Pasteur, Paris                                                                             | Mélanie Albert, Marion Barbet, Sylvie Behilli, Méline Bizard, Angela Brisabane, Flora Donati, Elénie Simon-Lorène, Vincent Enouf, Maud Vanperne, Sylvie van der Werf                                                                     |
| EPI_ISL_428352 | hCoV-19/France/IDF3518/2020            | Europe / France / Ile de France / Orsay 2020-03-23     | GH Nord Essonne Service de Biologie clinique                                                                                             | National Reference Center for Viruses of Respiratory Infections, Institut Pasteur, Paris                                                                             | Mélanie Albert, Marion Barbet, Sylvie Behilli, Méline Bizard, Angela Brisabane, Flora Donati, Elénie Simon-Lorène, Vincent Enouf, Maud Vanperne, Sylvie van der Werf                                                                     |
| EPI_ISL_428353 | hCoV-19/France/HF3534/2020             | Europe / France / Hauts de France / Cor2020-03-24      | CH Compiegne Laboratoire de Biologie                                                                                                     | National Reference Center for Viruses of Respiratory Infections, Institut Pasteur, Paris                                                                             | Mélanie Albert, Marion Barbet, Sylvie Behilli, Méline Bizard, Angela Brisabane, Flora Donati, Elénie Simon-Lorène, Vincent Enouf, Maud Vanperne, Sylvie van der Werf                                                                     |
| EPI_ISL_428354 | hCoV-19/France/IDF3577/2020            | Europe / France / Ile de France / Longjumeau2020-03-25 | LABM GH Nord Essonne de Longjumeau - BP 125                                                                                              | National Reference Center for Viruses of Respiratory Infections, Institut Pasteur, Paris                                                                             | Mélanie Albert, Marion Barbet, Sylvie Behilli, Méline Bizard, Angela Brisabane, Flora Donati, Elénie Simon-Lorène, Vincent Enouf, Maud Vanperne, Sylvie van der Werf                                                                     |
| EPI_ISL_428355 | hCoV-19/France/IDF2251/2020            | Europe / France / Ile de France / Garche2020-03-11     | Institut Médico Igpal- Hop R. Polincare                                                                                                  | National Reference Center for Viruses of Respiratory Infections, Institut Pasteur, Paris                                                                             | Mélanie Albert, Marion Barbet, Sylvie Behilli, Méline Bizard, Angela Brisabane, Flora Donati, Elénie Simon-Lorène, Vincent Enouf, Maud Vanperne, Sylvie van der Werf                                                                     |
| EPI_ISL_428356 | hCoV-19/France/IDF2252/2020            | Europe / France / Ile de France / Garche2020-03-11     | Institut Médico Igpal- Hop R. Polincare                                                                                                  | National Reference Center for Viruses of Respiratory Infections, Institut Pasteur, Paris                                                                             | Mélanie Albert, Marion Barbet, Sylvie Behilli, Méline Bizard, Angela Brisabane, Flora Donati, Elénie Simon-Lorène, Vincent Enouf, Maud Vanperne, Sylvie van der Werf                                                                     |
| EPI_ISL_428357 | hCoV-19/France/IDF2253/2020            | Europe / France / Ile de France / Garche2020-03-11     | Institut Médico Igpal- Hop R. Polincare                                                                                                  | National Reference Center for Viruses of Respiratory Infections, Institut Pasteur, Paris                                                                             | Mélanie Albert, Marion Barbet, Sylvie Behilli, Méline Bizard, Angela Brisabane, Flora Donati, Elénie Simon-Lorène, Vincent Enouf, Maud Vanperne, Sylvie van der Werf                                                                     |
| EPI_ISL_428358 | hCoV-19/France/HF3596/2020             | Europe / France / Hauts de France / Cha2020-03-24      | CH Jeanne de Navarre Laboratoire de Biologie                                                                                             | National Reference Center for Viruses of Respiratory Infections, Institut Pasteur, Paris                                                                             | Mélanie Albert, Marion Barbet, Sylvie Behilli, Méline Bizard, Angela Brisabane, Flora Donati, Elénie Simon-Lorène, Vincent Enouf, Maud Vanperne, Sylvie van der Werf                                                                     |
| EPI_ISL_428359 | hCoV-19/France/IDF3677/2020            | Europe / France / Hauts de France / Cor2020-03-23      | CH Compiegne Laboratoire de Biologie                                                                                                     | National Reference Center for Viruses of Respiratory Infections, Institut Pasteur, Paris                                                                             | Mélanie Albert, Marion Barbet, Sylvie Behilli, Méline Bizard, Angela Brisabane, Flora Donati, Elénie Simon-Lorène, Vincent Enouf, Maud Vanperne, Sylvie van der Werf                                                                     |
| EPI_ISL_428360 | hCoV-19/France/HF3678/2020             | Europe / France / Hauts de France / Cor2020-03-25      | CH Compiegne Laboratoire de Biologie                                                                                                     | National Reference Center for Viruses of Respiratory Infections, Institut Pasteur, Paris                                                                             | Mélanie Albert, Marion Barbet, Sylvie Behilli, Méline Bizard, Angela Brisabane, Flora Donati, Elénie Simon-Lorène, Vincent Enouf, Maud Vanperne, Sylvie van der Werf                                                                     |
| EPI_ISL_428361 | hCoV-19/France/IDF3703/2020            | Europe / France / Ile de France / Longjumeau2020-03-25 | LABM GH Nord Essonne de Longjumeau - BP 125                                                                                              | National Reference Center for Viruses of Respiratory Infections, Institut Pasteur, Paris                                                                             | Mélanie Albert, Marion Barbet, Sylvie Behilli, Méline Bizard, Angela Brisabane, Flora Donati, Elénie Simon-Lorène, Vincent Enouf, Maud Vanperne, Sylvie van der Werf                                                                     |
| EPI_ISL_428362 | hCoV-19/France/IDF3709/2020            | Europe / France / Ile de France / Longjumeau2020-03-25 | LABM GH Nord Essonne de Longjumeau - BP 125                                                                                              | National Reference Center for Viruses of Respiratory Infections, Institut Pasteur, Paris                                                                             | Mélanie Albert, Marion Barbet, Sylvie Behilli, Méline Bizard, Angela Brisabane, Flora Donati, Elénie Simon-Lorène, Vincent Enouf, Maud Vanperne, Sylvie van der Werf                                                                     |
| EPI_ISL_428363 | hCoV-19/France/IDF3745/2020            | Europe / France / Ile de France / Orsay 2020-03-26     | GH Nord Essonne Service de Biologie clinique                                                                                             | National Reference Center for Viruses of Respiratory Infections, Institut Pasteur, Paris                                                                             | Mélanie Albert, Marion Barbet, Sylvie Behilli, Méline Bizard, Angela Brisabane, Flora Donati, Elénie Simon-Lorène, Vincent Enouf, Maud Vanperne, Sylvie van der Werf                                                                     |
| EPI_ISL_428364 | hCoV-19/France/IDF3831/2020            | Europe / France / Ile de France / Mousy2020-03-23      | Cabinet Médical                                                                                                                          | National Reference Center for Viruses of Respiratory Infections, Institut Pasteur, Paris                                                                             | Mélanie Albert, Marion Barbet, Sylvie Behilli, Méline Bizard, Angela Brisabane, Flora Donati, Elénie Simon-Lorène, Vincent Enouf, Maud Vanperne, Sylvie van der Werf                                                                     |
| EPI_ISL_428365 | hCoV-19/France/IDF3930/2020            | Europe / France / Ile de France / Longjumeau2020-03-26 | LABM GH Nord Essonne de Longjumeau - BP 125                                                                                              | National Reference Center for Viruses of Respiratory Infections, Institut Pasteur, Paris                                                                             | Mélanie Albert, Marion Barbet, Sylvie Behilli, Méline Bizard, Angela Brisabane, Flora Donati, Elénie Simon-Lorène, Vincent Enouf, Maud Vanperne, Sylvie van der Werf                                                                     |
| EPI_ISL_428366 | hCoV-19/France/HF4225/2020             | Europe / France / Hauts de France / Cha2020-03-30      | CH Jeanne de Navarre Laboratoire de Biologie                                                                                             | National Reference Center for Viruses of Respiratory Infections, Institut Pasteur, Paris                                                                             | Mélanie Albert, Marion Barbet, Sylvie Behilli, Méline Bizard, Angela Brisabane, Flora Donati, Elénie Simon-Lorène, Vincent Enouf, Maud Vanperne, Sylvie van der Werf                                                                     |
| EPI_ISL_428367 | hCoV-19/France/N4427/2020              | Europe / France / Normandie / Caerentan 2020-03-23     | Cabinet Médical                                                                                                                          | National Reference Center for Viruses of Respiratory Infections, Institut Pasteur, Paris                                                                             | Mélanie Albert, Marion Barbet, Sylvie Behilli, Méline Bizard, Angela Brisabane, Flora Donati, Elénie Simon-Lorène, Vincent Enouf, Maud Vanperne, Sylvie van der Werf                                                                     |
| EPI_ISL_428368 | hCoV-19/Turkey/GLAB-COV13/2020         | Europe / Turkey / Istanbul 2020-04-16                  | Genomic Laboratory (GLAB) Corgitlab of Health Directorate of Istanbul and Istanbul Technical University                                  | Genomic Laboratory (GLAB), Istanbul Technical University                                                                                                             | Ilker Karacan, Tugba Kizilozga Akgun, Bugra Agoglu, Gizem Altun, Jale Yildiz, Betül Kozak, Elifnaz Celik, Arzu Ivern, Yasemin Kenet Demirek, Ozdem Akgun Dogan, Metlay Arslan, Levni Doganay, Gizem Diner Doganay                        |
| EPI_ISL_428851 | hCoV-19/Russia/Moscow-25/2020          | Europe / Russia / Moscow 2020-04-02                    | FBSBI "Chumakov Federal Scientific Center for Research and Development of Immune and Biological Products of Russian Academy of Sciences" | FBSBI "Chumakov Federal Scientific Center for Research and Development of Immune and Biological Products of Russian Academy of Sciences" & NRC "Kurchatov Institute" | Lubov Kozlovskaya, Anastasiya Pimenova, Georgiy Ignatyev, Anna Shishova, Aydar Alimkhankulov, Mikhail Rykhter, Evgen Pishchurich, Denis Protsenko, Anastasiya Beretovskaya                                                               |



|                |                                           |                                           |            |                                                                                                                                          |                                                                                                                                                                    |                                                                                                                                                                                                                                                                                                                                                                                |
|----------------|-------------------------------------------|-------------------------------------------|------------|------------------------------------------------------------------------------------------------------------------------------------------|--------------------------------------------------------------------------------------------------------------------------------------------------------------------|--------------------------------------------------------------------------------------------------------------------------------------------------------------------------------------------------------------------------------------------------------------------------------------------------------------------------------------------------------------------------------|
| EPI_ISL_428852 | hCoV-19/Russia/Moscow-35/2020             | Europe / Russia / Moscow                  | 2020-04-02 | FSBSI "Chumakov Federal Scientific Center for Research and Development of Immune and Biological Products of Russian Academy of Sciences" | FSBSI "Chumakov Federal Scientific Center for Research and Development of Immune and Biological Products of Russian Academy of Sciences" NRC "Kurchatov Institute" | Liubov Kozlovskaya, Anastasiya Pinaeva, Georgiy Ignatyev, Anna Shishova, Aydar Ishmuhamedov, Mikhail Rykhev, Egor Polikhorchuk, Denis Prokhorov, Anastasiya Berestovskaya                                                                                                                                                                                                      |
| EPI_ISL_428853 | hCoV-19/Gambia/GC-19-015/2020             | Africa / Gambia / West Coast Region       | 2020-03-17 | MRCO at LSHTM Genomics Lab                                                                                                               | MRCO at LSHTM Genomics Lab                                                                                                                                         | Sesay et al                                                                                                                                                                                                                                                                                                                                                                    |
| EPI_ISL_428856 | hCoV-19/Gambia/GC-19-026/2020             | Africa / Gambia / West Coast Region       | 2020-03-21 | MRCO at LSHTM Genomics Lab                                                                                                               | MRCO at LSHTM Genomics Lab                                                                                                                                         | Sesay et al                                                                                                                                                                                                                                                                                                                                                                    |
| EPI_ISL_430439 | hCoV-19/Malaysia/MR_WC1177/2020           | Asia / Malaysia                           | 2020-03-05 | Institute for Research, Infectious Disease Research Centre, National Institutes of Health, Ministry of Health Malaysia                   | Institute for Research Infectious Disease Research Centre, National Institutes of Health, Ministry of Health Malaysia                                              | Sugiljah J. Mohd-Zawati Z., Kalyanasundaram J., Azizian M.A., Mah-Sharati S., Hisham H.-A., Tan L.P., Abdul-Wahid M.Z., Mohd-Zain R., Ahmad N., Thayan R., Medabo J.P., Abdul-Fattah C.T., Onza O.J.T., Poudan F.G.M., Brunner K., Mercado E.S., Menais, D.L., Demetris, C.S.                                                                                                  |
| EPI_ISL_430436 | hCoV-19/Philippines/RTM17/2020            | Asia / Philippines                        | 2020-03-21 | Rizal Medical Center                                                                                                                     | Research Institute for Tropical Medicine                                                                                                                           | Vasiliki Plogka, Timokrala Karamitros, Athanasios Kosoyakos, Antonios Kalliaropoulos, Karelis Elina, Evangelitos Maria, Antonios Voulgaris-Kokota, Apostolos Kalliaropoulos, Nagamani K., Muthineni Badhukrishna, Thiruk Chander B., Raja Rao M., Kalyani Putty, Ravikumar P., Sunilja P., Panjaj Singh D., Anand Kumar K., Anil A., Upadhyay, Steven E., Bosinger, Rama Amara |
| EPI_ISL_430469 | hCoV-19/Greece/127_HP/2020                | Europe / Greece / Athens                  | 2020-02-29 | Hellenic Pasteur Institute, Public Health Laboratories                                                                                   | Hellenic Pasteur Institute, Public Health Laboratories, Unit of Merits                                                                                             | Thiruk Chander B., Muthineni Badhukrishna, Nagamani K., Raja Rao M., Kalyani Putty, Ravikumar P., Sunilja P., Panjaj Singh D., Anand Kumar K., Anil A., Upadhyay, Steven E., Bosinger, Rama Amara                                                                                                                                                                              |
| EPI_ISL_431103 | hCoV-19/India/GMC-KN443/2020              | Asia / India / Telangana / Hyderabad      | 2020-03-16 | Department of Microbiology, Gandhi Medical College and Hospital, Secunderabad, Hyderabad, India                                          | Department of Microbiology, Gandhi Medical College and Hospital, Secunderabad, Hyderabad, India                                                                    | Lin Q., Huang Zhimiao, Zhang Yanhua, Weng Yuyue                                                                                                                                                                                                                                                                                                                                |
| EPI_ISL_431117 | hCoV-19/India/GMC-T4069/2020              | Asia / India / Telangana / Hyderabad      | 2020-03-20 | Department of Microbiology, Gandhi Medical College and Hospital, Secunderabad, Hyderabad, India                                          | Department of Microbiology, Gandhi Medical College and Hospital, Secunderabad, Hyderabad, India                                                                    | Lin Q., Huang Zhimiao, Zhang Yanhua, Weng Yuyue                                                                                                                                                                                                                                                                                                                                |
| EPI_ISL_431118 | hCoV-19/Fujian/MJ320001/2020              | Asia / China / Fujian                     | 2020-02-10 | Fujian Center for Disease Control and Prevention                                                                                         | Fujian Center for Disease Control and Prevention                                                                                                                   | Shanika S.N., Wu C.-Y., Cugutan J.R., Elbadry M.A., Morris J.G., Jr and Leditsky J.A.                                                                                                                                                                                                                                                                                          |
| EPI_ISL_431175 | hCoV-19/Fujian/XJ520022/2020              | Asia / China / Fujian                     | 2020-01-23 | Fujian Center for Disease Control and Prevention                                                                                         | Fujian Center for Disease Control and Prevention                                                                                                                   | Shanika S.N., Wu C.-Y., Cugutan J.R., Elbadry M.A., Morris J.G., Jr and Leditsky J.A.                                                                                                                                                                                                                                                                                          |
| EPI_ISL_434677 | hCoV-19/Israel/USAFI_UF3/2020             | North America / USA / Florida             | 2020-03-25 | Ledinsky Laboratory at Emerging Pathogens Institute                                                                                      | Ledinsky Laboratory at Emerging Pathogens Institute                                                                                                                | Shanika S.N., Wu C.-Y., Cugutan J.R., Elbadry M.A., Morris J.G., Jr and Leditsky J.A.                                                                                                                                                                                                                                                                                          |
| EPI_ISL_435145 | hCoV-19/Italy/TE664/2020                  | Europe / Italy / Abruzzo                  | 2020-03-24 | Ospedale Civile Giuseppe Mazzini                                                                                                         | Istituto Zooprofilattico Sperimentale dell'Abruzzo e Molise "G. Caporale"                                                                                          | Lorusso A., Marcano M., Di Domenico M., Ancora M., Curini V., Mangone I., Rinaldi A., Di Pasquale A., Cammà C., Puglia I., Savini G.                                                                                                                                                                                                                                           |
| EPI_ISL_435146 | hCoV-19/Italy/TE12337/2020                | Europe / Italy / Abruzzo                  | 2020-04-07 | Villa Serena del Dr. Leonardo Petrucci                                                                                                   | Istituto Zooprofilattico Sperimentale dell'Abruzzo e Molise "G. Caporale"                                                                                          | Lorusso A., Marcano M., Di Domenico M., Ancora M., Curini V., Mangone I., Rinaldi A., Di Pasquale A., Cammà C., Puglia I., Savini G.                                                                                                                                                                                                                                           |
| EPI_ISL_435147 | hCoV-19/Italy/TE12759/2020                | Europe / Italy / Abruzzo                  | 2020-04-08 | Villa Serena del Dr. Leonardo Petrucci                                                                                                   | Ospedale SS Annunziata                                                                                                                                             | Lorusso A., Marcano M., Di Domenico M., Ancora M., Curini V., Mangone I., Rinaldi A., Di Pasquale A., Cammà C., Puglia I., Savini G.                                                                                                                                                                                                                                           |
| EPI_ISL_435148 | hCoV-19/Italy/TE13491/2020                | Europe / Italy / Abruzzo                  | 2020-04-08 | Ospedale SS Annunziata                                                                                                                   | Istituto Zooprofilattico Sperimentale dell'Abruzzo e Molise "G. Caporale"                                                                                          | Lorusso A., Marcano M., Di Domenico M., Ancora M., Curini V., Mangone I., Rinaldi A., Di Pasquale A., Cammà C., Puglia I., Savini G.                                                                                                                                                                                                                                           |
| EPI_ISL_435149 | hCoV-19/Italy/TE13457/2020                | Europe / Italy / Abruzzo                  | 2020-04-08 | SERVIZIO DI IGIENE E SANITÀ PUBBLICA/ASL Teramo                                                                                          | Istituto Zooprofilattico Sperimentale dell'Abruzzo e Molise "G. Caporale"                                                                                          | Lorusso A., Marcano M., Di Domenico M., Ancora M., Curini V., Mangone I., Rinaldi A., Di Pasquale A., Cammà C., Puglia I., Savini G.                                                                                                                                                                                                                                           |
| EPI_ISL_435150 | hCoV-19/Italy/TE12774/2020                | Europe / Italy / Abruzzo                  | 2020-04-08 | Ospedale SS Annunziata                                                                                                                   | Istituto Zooprofilattico Sperimentale dell'Abruzzo e Molise "G. Caporale"                                                                                          | Lorusso A., Marcano M., Di Domenico M., Ancora M., Curini V., Mangone I., Rinaldi A., Di Pasquale A., Cammà C., Puglia I., Savini G.                                                                                                                                                                                                                                           |
| EPI_ISL_435151 | hCoV-19/Hungary/SRC-00126/2020            | Europe / Hungary / Baranya                | 2020-04-08 | Ospedale SS Annunziata                                                                                                                   | Istituto Zooprofilattico Sperimentale dell'Abruzzo e Molise "G. Caporale"                                                                                          | Lorusso A., Marcano M., Di Domenico M., Ancora M., Curini V., Mangone I., Rinaldi A., Di Pasquale A., Cammà C., Puglia I., Savini G.                                                                                                                                                                                                                                           |
| EPI_ISL_435152 | hCoV-19/Italy/TE13859/2020                | Europe / Italy / Abruzzo                  | 2020-04-09 | Servizio di Igiene, Epidemiologia e Sanità Pubblica (SIESP) Avezzano                                                                     | Istituto Zooprofilattico Sperimentale dell'Abruzzo e Molise "G. Caporale"                                                                                          | Lorusso A., Marcano M., Di Domenico M., Ancora M., Curini V., Mangone I., Rinaldi A., Di Pasquale A., Cammà C., Puglia I., Savini G.                                                                                                                                                                                                                                           |
| EPI_ISL_435153 | hCoV-19/Italy/TE14297/2020                | Europe / Italy / Abruzzo                  | 2020-04-09 | SERVIZIO DI IGIENE E SANITÀ PUBBLICA/ASL Teramo                                                                                          | Istituto Zooprofilattico Sperimentale dell'Abruzzo e Molise "G. Caporale"                                                                                          | Lorusso A., Marcano M., Di Domenico M., Ancora M., Curini V., Mangone I., Rinaldi A., Di Pasquale A., Cammà C., Puglia I., Savini G.                                                                                                                                                                                                                                           |
| EPI_ISL_435154 | hCoV-19/Italy/TE14162/2020                | Europe / Italy / Abruzzo                  | 2020-04-09 | SERVIZIO DI IGIENE E SANITÀ PUBBLICA/ASL Teramo                                                                                          | Istituto Zooprofilattico Sperimentale dell'Abruzzo e Molise "G. Caporale"                                                                                          | Lorusso A., Marcano M., Di Domenico M., Ancora M., Curini V., Mangone I., Rinaldi A., Di Pasquale A., Cammà C., Puglia I., Savini G.                                                                                                                                                                                                                                           |
| EPI_ISL_435155 | hCoV-19/Italy/TE14168/2020                | Europe / Italy / Abruzzo                  | 2020-04-09 | SERVIZIO DI IGIENE E SANITÀ PUBBLICA/ASL Teramo                                                                                          | Istituto Zooprofilattico Sperimentale dell'Abruzzo e Molise "G. Caporale"                                                                                          | Lorusso A., Marcano M., Di Domenico M., Ancora M., Curini V., Mangone I., Rinaldi A., Di Pasquale A., Cammà C., Puglia I., Savini G.                                                                                                                                                                                                                                           |
| EPI_ISL_435407 | hCoV-19/Hungary/SRC-00183/2020            | Europe / Hungary / Baranya                | 2020-03-22 | Virological Research Group, Szentágotai Research Centre                                                                                  | Bioinformatics Research Group, Szentágotai Research Centre                                                                                                         | Péter Urbán, Endre Gábor Tóth, Gábor Kemenesi, Róbert Herczeg, Ágnes Gyenesi, Ferenc Jakab                                                                                                                                                                                                                                                                                     |
| EPI_ISL_435408 | hCoV-19/Hungary/SRC-00186/2020            | Europe / Hungary / Baranya                | 2020-03-22 | Virological Research Group, Szentágotai Research Centre                                                                                  | Bioinformatics Research Group, Szentágotai Research Centre                                                                                                         | Péter Urbán, Endre Gábor Tóth, Gábor Kemenesi, Róbert Herczeg, Ágnes Gyenesi, Ferenc Jakab                                                                                                                                                                                                                                                                                     |
| EPI_ISL_435410 | hCoV-19/Hungary/SRC-00419/2020            | Europe / Hungary / Baranya                | 2020-03-26 | Virological Research Group, Szentágotai Research Centre                                                                                  | Bioinformatics Research Group, Szentágotai Research Centre                                                                                                         | Péter Urbán, Endre Gábor Tóth, Gábor Kemenesi, Róbert Herczeg, Ágnes Gyenesi, Ferenc Jakab                                                                                                                                                                                                                                                                                     |
| EPI_ISL_435412 | hCoV-19/Hungary/SRC-00792/2020            | Europe / Hungary / Baranya                | 2020-03-30 | Virological Research Group, Szentágotai Research Centre                                                                                  | Bioinformatics Research Group, Szentágotai Research Centre                                                                                                         | Péter Urbán, Endre Gábor Tóth, Gábor Kemenesi, Róbert Herczeg, Ágnes Gyenesi, Ferenc Jakab                                                                                                                                                                                                                                                                                     |
| EPI_ISL_435414 | hCoV-19/Hungary/SRC-00827/2020            | Europe / Hungary / Baranya                | 2020-03-30 | Virological Research Group, Szentágotai Research Centre                                                                                  | Bioinformatics Research Group, Szentágotai Research Centre                                                                                                         | Péter Urbán, Endre Gábor Tóth, Gábor Kemenesi, Róbert Herczeg, Ágnes Gyenesi, Ferenc Jakab                                                                                                                                                                                                                                                                                     |
| EPI_ISL_435416 | hCoV-19/Hungary/SRC-00620/2020            | Europe / Hungary / Baranya                | 2020-03-27 | Virological Research Group, Szentágotai Research Centre                                                                                  | Bioinformatics Research Group, Szentágotai Research Centre                                                                                                         | Péter Urbán, Endre Gábor Tóth, Gábor Kemenesi, Róbert Herczeg, Ágnes Gyenesi, Ferenc Jakab                                                                                                                                                                                                                                                                                     |
| EPI_ISL_435419 | hCoV-19/Hungary/SRC-00055/2020            | Europe / Hungary / Baranya                | 2020-03-20 | Virological Research Group, Szentágotai Research Centre                                                                                  | Bioinformatics Research Group, Szentágotai Research Centre                                                                                                         | Péter Urbán, Endre Gábor Tóth, Gábor Kemenesi, Róbert Herczeg, Ágnes Gyenesi, Ferenc Jakab                                                                                                                                                                                                                                                                                     |
| EPI_ISL_435422 | hCoV-19/Hungary/MBL-464/2020              | Europe / Hungary / Balassagyarmat         | 2020-03-27 | Virological Research Group, Szentágotai Research Centre                                                                                  | Bioinformatics Research Group, Szentágotai Research Centre                                                                                                         | Péter Urbán, Endre Gábor Tóth, Gábor Kemenesi, Róbert Herczeg, Ágnes Gyenesi, Ferenc Jakab                                                                                                                                                                                                                                                                                     |
| EPI_ISL_435423 | hCoV-19/Hungary/MBL-465/2020              | Europe / Hungary / Balassagyarmat         | 2020-03-27 | Virological Research Group, Szentágotai Research Centre                                                                                  | Bioinformatics Research Group, Szentágotai Research Centre                                                                                                         | Péter Urbán, Endre Gábor Tóth, Gábor Kemenesi, Róbert Herczeg, Ágnes Gyenesi, Ferenc Jakab                                                                                                                                                                                                                                                                                     |
| EPI_ISL_435424 | hCoV-19/Hungary/MBL-469/2020              | Europe / Hungary / Balassagyarmat         | 2020-03-27 | Virological Research Group, Szentágotai Research Centre                                                                                  | Bioinformatics Research Group, Szentágotai Research Centre                                                                                                         | Péter Urbán, Endre Gábor Tóth, Gábor Kemenesi, Róbert Herczeg, Ágnes Gyenesi, Ferenc Jakab                                                                                                                                                                                                                                                                                     |
| EPI_ISL_435425 | hCoV-19/Hungary/SRC-17886/2020            | Europe / Hungary / Szeged                 | 2020-03-19 | Virological Research Group, Szentágotai Research Centre                                                                                  | Bioinformatics Research Group, Szentágotai Research Centre                                                                                                         | Péter Urbán, Endre Gábor Tóth, Gábor Kemenesi, Róbert Herczeg, Ágnes Gyenesi, Ferenc Jakab                                                                                                                                                                                                                                                                                     |
| EPI_ISL_435430 | hCoV-19/Hungary/SRC-03670w/2020           | Europe / Hungary / Kecskemet              | 2020-03-29 | Virological Research Group, Szentágotai Research Centre                                                                                  | Bioinformatics Research Group, Szentágotai Research Centre                                                                                                         | Péter Urbán, Endre Gábor Tóth, Gábor Kemenesi, Róbert Herczeg, Ágnes Gyenesi, Ferenc Jakab                                                                                                                                                                                                                                                                                     |
| EPI_ISL_435431 | hCoV-19/Hungary/SRC-00572w/2020           | Europe / Hungary / Kecskemet              | 2020-03-25 | Virological Research Group, Szentágotai Research Centre                                                                                  | Bioinformatics Research Group, Szentágotai Research Centre                                                                                                         | Péter Urbán, Endre Gábor Tóth, Gábor Kemenesi, Róbert Herczeg, Ágnes Gyenesi, Ferenc Jakab                                                                                                                                                                                                                                                                                     |
| EPI_ISL_436412 | hCoV-19/DRC/2299/2020                     | Africa / Democratic Republic of the Congo | 2020-04-14 | Viral Respiratory Lab, National Institute for Biomedical Research (INRB)                                                                 | Pathogen Sequencing Lab, National Institute for Biomedical Research (INRB)                                                                                         | Placide Mbalia-Kingebeti, Edith Nkwemba, Eddy Kinginda-Lusamaki, Amuri Aziza, Franciska Muyembe-Makumbi, Catherine Pratt, Mathilde Jeanfranc, Josh Quick, Allison Black, James Haddfield, Trevor Bedford, Ian Goodfellow, Andrew Rambaut, Nils Loman, Kristian Andersen, Michael Wiley, Steve Ahuka-Mundandi, Paul-Jacques Muyembe Tshamba                                     |
| EPI_ISL_436715 | hCoV-19/Russia/Moscow-GCBL1/2020          | Europe / Russia / Moscow                  | 2020-04-14 | Genomics and Computational Biology Lab, Scientific Research Institute of Physical-Chemical Medicine, FMBA of Russia                      | Genomics and Computational Biology Lab, Scientific Research Institute of Physical-Chemical Medicine, FMBA of Russia                                                | A. Pavlenko, O. Guskova, K. Klimina, V. Veselovskiy, A. Manolov, D. Fedorov, V. Govorun and E. Iina                                                                                                                                                                                                                                                                            |
| EPI_ISL_436716 | hCoV-19/Russia/Moscow-GCBL2/2020          | Europe / Russia / Moscow                  | 2020-04-14 | Genomics and Computational Biology Lab, Scientific Research Institute of Physical-Chemical Medicine, FMBA of Russia                      | Genomics and Computational Biology Lab, Scientific Research Institute of Physical-Chemical Medicine, FMBA of Russia                                                | A. Pavlenko, O. Guskova, K. Klimina, V. Veselovskiy, A. Manolov, D. Fedorov, V. Govorun and E. Iina                                                                                                                                                                                                                                                                            |
| EPI_ISL_436717 | hCoV-19/Russia/Moscow-GCBL3/2020          | Europe / Russia / Moscow                  | 2020-04-14 | Genomics and Computational Biology Lab, Scientific Research Institute of Physical-Chemical Medicine, FMBA of Russia                      | Genomics and Computational Biology Lab, Scientific Research Institute of Physical-Chemical Medicine, FMBA of Russia                                                | A. Pavlenko, O. Guskova, K. Klimina, V. Veselovskiy, A. Manolov, D. Fedorov, V. Govorun and E. Iina                                                                                                                                                                                                                                                                            |
| EPI_ISL_436718 | hCoV-19/Italy/TE5473/2020                 | Europe / Italy / Abruzzo                  | 2020-03-19 | Ospedale Regionale San Salvatore                                                                                                         | Istituto Zooprofilattico Sperimentale dell'Abruzzo e Molise "G. Caporale"                                                                                          | Lorusso A., Marcano M., Di Domenico M., Ancora M., Curini V., Mangone I., Rinaldi A., Di Pasquale A., Cammà C., Puglia I., Savini G.                                                                                                                                                                                                                                           |
| EPI_ISL_436719 | hCoV-19/Italy/TE5541/2020                 | Europe / Italy / Abruzzo                  | 2020-03-20 | Ospedale Civile S. Liberatore 6 Atri                                                                                                     | Istituto Zooprofilattico Sperimentale dell'Abruzzo e Molise "G. Caporale"                                                                                          | Lorusso A., Marcano M., Di Domenico M., Ancora M., Curini V., Mangone I., Rinaldi A., Di Pasquale A., Cammà C., Puglia I., Savini G.                                                                                                                                                                                                                                           |
| EPI_ISL_436720 | hCoV-19/Italy/TE5543/2020                 | Europe / Italy / Abruzzo                  | 2020-03-20 | Ospedale Civile S. Liberatore 6 Atri                                                                                                     | Istituto Zooprofilattico Sperimentale dell'Abruzzo e Molise "G. Caporale"                                                                                          | Lorusso A., Marcano M., Di Domenico M., Ancora M., Curini V., Mangone I., Rinaldi A., Di Pasquale A., Cammà C., Puglia I., Savini G.                                                                                                                                                                                                                                           |
| EPI_ISL_436721 | hCoV-19/Italy/TE5545/2020                 | Europe / Italy / Abruzzo                  | 2020-03-20 | Ospedale Civile S. Liberatore 6 Atri                                                                                                     | Istituto Zooprofilattico Sperimentale dell'Abruzzo e Molise "G. Caporale"                                                                                          | Lorusso A., Marcano M., Di Domenico M., Ancora M., Curini V., Mangone I., Rinaldi A., Di Pasquale A., Cammà C., Puglia I., Savini G.                                                                                                                                                                                                                                           |
| EPI_ISL_436722 | hCoV-19/Italy/TE5547/2020                 | Europe / Italy / Abruzzo                  | 2020-03-20 | Ospedale Civile S. Liberatore 6 Atri                                                                                                     | Istituto Zooprofilattico Sperimentale dell'Abruzzo e Molise "G. Caporale"                                                                                          | Lorusso A., Marcano M., Di Domenico M., Ancora M., Curini V., Mangone I., Rinaldi A., Di Pasquale A., Cammà C., Puglia I., Savini G.                                                                                                                                                                                                                                           |
| EPI_ISL_436723 | hCoV-19/Italy/TE5687/2020                 | Europe / Italy / Abruzzo                  | 2020-03-20 | Ospedale Civile Giuseppe Mazzini                                                                                                         | Istituto Zooprofilattico Sperimentale dell'Abruzzo e Molise "G. Caporale"                                                                                          | Lorusso A., Marcano M., Di Domenico M., Ancora M., Curini V., Mangone I., Rinaldi A., Di Pasquale A., Cammà C., Puglia I., Savini G.                                                                                                                                                                                                                                           |
| EPI_ISL_436724 | hCoV-19/Italy/TE5687/2020                 | Europe / Italy / Abruzzo                  | 2020-03-21 | Ospedale Civile S. Liberatore 6 Atri                                                                                                     | Istituto Zooprofilattico Sperimentale dell'Abruzzo e Molise "G. Caporale"                                                                                          | Lorusso A., Marcano M., Di Domenico M., Ancora M., Curini V., Mangone I., Rinaldi A., Di Pasquale A., Cammà C., Puglia I., Savini G.                                                                                                                                                                                                                                           |
| EPI_ISL_436725 | hCoV-19/Italy/TE27020/2020                | Europe / Italy / Abruzzo                  | 2020-04-27 | RSARP Villa San Giovanni - Gruppo Edos                                                                                                   | Istituto Zooprofilattico Sperimentale dell'Abruzzo e Molise "G. Caporale"                                                                                          | Lorusso A., Marcano M., Di Domenico M., Ancora M., Curini V., Mangone I., Rinaldi A., Di Pasquale A., Cammà C., Puglia I., Savini G.                                                                                                                                                                                                                                           |
| EPI_ISL_436726 | hCoV-19/Italy/TE2653/2020                 | Europe / Italy / Abruzzo                  | 2020-04-27 | SERVIZIO DI IGIENE E SANITÀ PUBBLICA/ASL Teramo                                                                                          | Istituto Zooprofilattico Sperimentale dell'Abruzzo e Molise "G. Caporale"                                                                                          | Lorusso A., Marcano M., Di Domenico M., Ancora M., Curini V., Mangone I., Rinaldi A., Di Pasquale A., Cammà C., Puglia I., Savini G.                                                                                                                                                                                                                                           |
| EPI_ISL_436727 | hCoV-19/Italy/TE26539/2020                | Europe / Italy / Abruzzo                  | 2020-04-27 | SERVIZIO DI IGIENE E SANITÀ PUBBLICA/ASL Teramo                                                                                          | Istituto Zooprofilattico Sperimentale dell'Abruzzo e Molise "G. Caporale"                                                                                          | Lorusso A., Marcano M., Di Domenico M., Ancora M., Curini V., Mangone I., Rinaldi A., Di Pasquale A., Cammà C., Puglia I., Savini G.                                                                                                                                                                                                                                           |
| EPI_ISL_436728 | hCoV-19/Italy/TE26540/2020                | Europe / Italy / Abruzzo                  | 2020-04-27 | SERVIZIO DI IGIENE E SANITÀ PUBBLICA/ASL Teramo                                                                                          | Istituto Zooprofilattico Sperimentale dell'Abruzzo e Molise "G. Caporale"                                                                                          | Lorusso A., Marcano M., Di Domenico M., Ancora M., Curini V., Mangone I., Rinaldi A., Di Pasquale A., Cammà C., Puglia I., Savini G.                                                                                                                                                                                                                                           |
| EPI_ISL_436729 | hCoV-19/Italy/TE26634/2020                | Europe / Italy / Abruzzo                  | 2020-04-27 | SERVIZIO DI IGIENE E SANITÀ PUBBLICA/ASL Teramo                                                                                          | Istituto Zooprofilattico Sperimentale dell'Abruzzo e Molise "G. Caporale"                                                                                          | Lorusso A., Marcano M., Di Domenico M., Ancora M., Curini V., Mangone I., Rinaldi A., Di Pasquale A., Cammà C., Puglia I., Savini G.                                                                                                                                                                                                                                           |
| EPI_ISL_436730 | hCoV-19/Italy/TE26999/2020                | Europe / Italy / Abruzzo                  | 2020-04-27 | Servizio di igiene epidemiologia e sanità pubblica (Siesp) Chieti                                                                        | Istituto Zooprofilattico Sperimentale dell'Abruzzo e Molise "G. Caporale"                                                                                          | Lorusso A., Marcano M., Di Domenico M., Ancora M., Curini V., Mangone I., Rinaldi A., Di Pasquale A., Cammà C., Puglia I., Savini G.                                                                                                                                                                                                                                           |
| EPI_ISL_436731 | hCoV-19/Italy/TE26423/2020                | Europe / Italy / Abruzzo                  | 2020-04-26 | Ospedale Civile S. Liberatore 6 Atri                                                                                                     | Istituto Zooprofilattico Sperimentale dell'Abruzzo e Molise "G. Caporale"                                                                                          | Lorusso A., Marcano M., Di Domenico M., Ancora M., Curini V., Mangone I., Rinaldi A., Di Pasquale A., Cammà C., Puglia I., Savini G.                                                                                                                                                                                                                                           |
| EPI_ISL_436732 | hCoV-19/Italy/TE26425/2020                | Europe / Italy / Abruzzo                  | 2020-04-27 | Ospedale Civile S. Liberatore 6 Atri                                                                                                     | Istituto Zooprofilattico Sperimentale dell'Abruzzo e Molise "G. Caporale"                                                                                          | Lorusso A., Marcano M., Di Domenico M., Ancora M., Curini V., Mangone I., Rinaldi A., Di Pasquale A., Cammà C., Puglia I., Savini G.                                                                                                                                                                                                                                           |
| EPI_ISL_437200 | hCoV-19/Austria/Graz-MUG4/2020            | Europe / Austria / Styria                 | 2020-03-31 | Diagnostic- and Research Institute of Pathology, Medical University of Graz                                                              | Diagnostic- and Research Institute of Pathology, Medical University of Graz                                                                                        | Karl Kasher, Peter Regling, Martin Zacharias, Gregor Gorkiewicz                                                                                                                                                                                                                                                                                                                |
| EPI_ISL_437201 | hCoV-19/Austria/Graz-MUG5/2020            | Europe / Austria / Styria                 | 2020-04-02 | Diagnostic- and Research Institute of Pathology, Medical University of Graz                                                              | Diagnostic- and Research Institute of Pathology, Medical University of Graz                                                                                        | Karl Kasher, Peter Regling, Martin Zacharias, Gregor Gorkiewicz                                                                                                                                                                                                                                                                                                                |
| EPI_ISL_437202 | hCoV-19/Austria/Graz-MUG6/2020            | Europe / Austria / Styria                 | 2020-04-03 | Diagnostic- and Research Institute of Pathology, Medical University of Graz                                                              | Diagnostic- and Research Institute of Pathology, Medical University of Graz                                                                                        | Karl Kasher, Peter Regling, Martin Zacharias, Gregor Gorkiewicz                                                                                                                                                                                                                                                                                                                |
| EPI_ISL_437203 | hCoV-19/Austria/Graz-MUG7/2020            | Europe / Austria / Styria                 | 2020-04-06 | Diagnostic- and Research Institute of Pathology, Medical University of Graz                                                              | Diagnostic- and Research Institute of Pathology, Medical University of Graz                                                                                        | Karl Kasher, Peter Regling, Martin Zacharias, Gregor Gorkiewicz                                                                                                                                                                                                                                                                                                                |
| EPI_ISL_437208 | hCoV-19/Austria/Graz-MUG8/2020            | Europe / Austria / Styria                 | 2020-04-08 | Diagnostic- and Research Institute of Pathology, Medical University of Graz                                                              | Diagnostic- and Research Institute of Pathology, Medical University of Graz                                                                                        | Karl Kasher, Peter Regling, Martin Zacharias, Gregor Gorkiewicz                                                                                                                                                                                                                                                                                                                |
| EPI_ISL_437299 | hCoV-19/Austria/Graz-MUG9/2020            | Europe / Austria / Styria                 | 2020-04-09 | Diagnostic- and Research Institute of Pathology, Medical University of Graz                                                              | Diagnostic- and Research Institute of Pathology, Medical University of Graz                                                                                        | Karl Kasher, Peter Regling, Martin Zacharias, Gregor Gorkiewicz                                                                                                                                                                                                                                                                                                                |
| EPI_ISL_437700 | hCoV-19/Saudi Arabia/KAUST-Makkah177/2020 | Asia / Saudi Arabia / Makkah              | 2020-04-14 | Pathogen Genomics Lab King Abdulah University of Science and Technology(KAUST)                                                           | Pathogen Genomics Lab King Abdulah University of Science and Technology(KAUST)                                                                                     | Sharif Hala.Fadwa Aclat Alhan Alnomai, Asim Khogeer, Sara Mfarrej, Khalid Alghamhi, Raeece Naeeem, Amr Kumar Suduth.Fathia Ben-Rached, Rahul Salunke, Anwar Hashem, Naf Almontashhi, Anab Pain                                                                                                                                                                                 |
| EPI_ISL_437701 | hCoV-19/Saudi Arabia/KAUST-Makkah178/2020 | Asia / Saudi Arabia / Makkah              | 2020-04-14 | Pathogen Genomics Lab King Abdulah University of Science and Technology(KAUST)                                                           | Pathogen Genomics Lab King Abdulah University of Science and Technology(KAUST)                                                                                     | Sharif Hala.Fadwa Aclat Alhan Alnomai, Asim Khogeer, Sara Mfarrej, Khalid Alghamhi, Raeece Naeeem, Amr Kumar Suduth.Fathia Ben-Rached, Rahul Salunke, Anwar Hashem, Naf Almontashhi, Anab Pain                                                                                                                                                                                 |
| EPI_ISL_437702 | hCoV-19/Saudi Arabia/KAUST-Makkah179/2020 | Asia / Saudi Arabia / Makkah              | 2020-04-14 | Pathogen Genomics Lab King Abdulah University of Science and Technology(KAUST)                                                           | Pathogen Genomics Lab King Abdulah University of Science and Technology(KAUST)                                                                                     | Sharif Hala.Fadwa Aclat Alhan Alnomai, Asim Khogeer, Sara Mfarrej, Khalid Alghamhi, Raeece Naeeem, Amr Kumar Suduth.Fathia Ben-Rached, Rahul Salunke, Anwar Hashem, Naf Almontashhi, Anab Pain                                                                                                                                                                                 |
| EPI_ISL_437703 | hCoV-19/Saudi Arabia/KAUST-Makkah181/2020 | Asia / Saudi Arabia / Makkah              | 2020-04-14 | Pathogen Genomics Lab King Abdulah University of Science and Technology(KAUST)                                                           | Pathogen Genomics Lab King Abdulah University of Science and Technology(KAUST)                                                                                     | Sharif Hala.Fadwa Aclat Alhan Alnomai, Asim Khogeer, Sara Mfarrej, Khalid Alghamhi, Raeece Naeeem, Amr Kumar Suduth.Fathia Ben-Rached, Rahul Salunke, Anwar Hashem, Naf Almontashhi, Anab Pain                                                                                                                                                                                 |
| EPI_ISL_437704 | hCoV-19/Saudi Arabia/KAUST-Makkah183/2020 | Asia / Saudi Arabia / Makkah              | 2020-04-14 | Pathogen Genomics Lab King Abdulah University of Science and Technology(KAUST)                                                           | Pathogen Genomics Lab King Abdulah University of Science and Technology(KAUST)                                                                                     | Sharif Hala.Fadwa Aclat Alhan Alnomai, Asim Khogeer, Sara Mfarrej, Khalid Alghamhi, Raeece Naeeem, Amr Kumar Suduth.Fathia Ben-Rached, Rahul Salunke, Anwar Hashem, Naf Almontashhi, Anab Pain                                                                                                                                                                                 |
| EPI_ISL_437705 | hCoV-19/Saudi Arabia/KAUST-Makkah188/2020 | Asia / Saudi Arabia / Makkah              | 2020-04-14 | Pathogen Genomics Lab King Abdulah University of Science and Technology(KAUST)                                                           | Pathogen Genomics Lab King Abdulah University of Science and Technology(KAUST)                                                                                     | Sharif Hala.Fadwa Aclat Alhan Alnomai, Asim Khogeer, Sara Mfarrej, Khalid Alghamhi, Raeece Naeeem, Amr Kumar Suduth.Fathia Ben-Rached, Rahul Salunke, Anwar Hashem, Naf Almontashhi, Anab Pain                                                                                                                                                                                 |
| EPI_ISL_437706 | hCoV-19/Saudi Arabia/KAUST-Makkah189/2020 | Asia / Saudi Arabia / Makkah              | 2020-04-14 | Pathogen Genomics Lab King Abdulah University of Science and Technology(KAUST)                                                           | Pathogen Genomics Lab King Abdulah University of Science and Technology(KAUST)                                                                                     | Sharif Hala.Fadwa Aclat Alhan Alnomai, Asim Khogeer, Sara Mfarrej, Khalid Alghamhi, Raeece Naeeem, Amr Kumar Suduth.Fathia Ben-Rached, Rahul Salunke, Anwar Hashem, Naf Almontashhi, Anab Pain                                                                                                                                                                                 |
| EPI_ISL_437707 | hCoV-19/Saudi Arabia/KAUST-Makkah190/2020 | Asia / Saudi Arabia / Makkah              | 2020-04-14 | Pathogen Genomics Lab King Abdulah University of Science and Technology(KAUST)                                                           | Pathogen Genomics Lab King Abdulah University of Science and Technology(KAUST)                                                                                     | Sharif Hala.Fadwa Aclat Alhan Alnomai, Asim Khogeer, Sara Mfarrej, Khalid Alghamhi, Raeece Naeeem, Amr Kumar Suduth.Fathia Ben-Rached, Rahul Salunke, Anwar Hashem, Naf Almontashhi, Anab Pain                                                                                                                                                                                 |
| EPI_ISL_437708 | hCoV-19/Saudi Arabia/KAUST-Makkah193/2020 | Asia / Saudi Arabia / Makkah              | 2020-04-14 | Pathogen Genomics Lab King Abdulah University of Science and Technology(KAUST)                                                           | Pathogen Genomics Lab King Abdulah University of Science and Technology(KAUST)                                                                                     | Sharif Hala.Fadwa Aclat Alhan Alnomai, Asim Khogeer, Sara Mfarrej, Khalid Alghamhi, Raeece Naeeem, Amr Kumar Suduth.Fathia Ben-Rached, Rahul Salunke, Anwar Hashem, Naf Almontashhi, Anab Pain                                                                                                                                                                                 |
| EPI_ISL_437709 | hCoV-19/Saudi Arabia/KAUST-Makkah194/2020 | Asia / Saudi Arabia / Makkah              | 2020-04-14 | Pathogen Genomics Lab King Abdulah University of Science and Technology(KAUST)                                                           | Pathogen Genomics Lab King Abdulah University of Science and Technology(KAUST)                                                                                     | Sharif Hala.Fadwa Aclat Alhan Alnomai, Asim Khogeer, Sara Mfarrej, Khalid Alghamhi, Raeece Naeeem, Amr Kumar Suduth.Fathia Ben-Rached, Rahul Salunke, Anwar Hashem, Naf Almontashhi, Anab Pain                                                                                                                                                                                 |
| EPI_ISL_437710 | hCoV-19/Saudi Arabia/KAUST-Makkah196/2020 | Asia / Saudi Arabia / Makkah              | 2020-04-14 | Pathogen Genomics Lab King Abdulah University of Science and Technology(KAUST)                                                           | Pathogen Genomics Lab King Abdulah University of Science and Technology(KAUST)                                                                                     | Sharif Hala.Fadwa Aclat Alhan Alnomai, Asim Khogeer, Sara Mfarrej, Khalid Alghamhi, Raeece Naeeem, Amr Kumar Suduth.Fathia Ben-Rached, Rahul Salunke, Anwar Hashem, Naf Almontashhi, Anab Pain                                                                                                                                                                                 |
| EPI_ISL_437711 | hCoV-19/Saudi Arabia/KAUST-Makkah198/2020 | Asia / Saudi Arabia / Makkah              | 2020-04-14 | Pathogen Genomics Lab King Abdulah University of Science and Technology(KAUST)                                                           | Pathogen Genomics Lab King Abdulah University of Science and Technology(KAUST)                                                                                     | Sharif Hala.Fadwa Aclat Alhan Alnomai, Asim Khogeer, Sara Mfarrej, Khalid Alghamhi, Raeece Naeeem, Amr Kumar Suduth.Fathia Ben-Rached, Rahul Salunke, Anwar Hashem, Naf Almontashhi, Anab Pain                                                                                                                                                                                 |
| EPI_ISL_437712 | hCoV-19/Saudi Arabia/KAUST-Makkah202/2020 | Asia / Saudi Arabia / Makkah              | 2020-04-14 | Pathogen Genomics Lab King Abdulah University of Science and Technology(KAUST)                                                           | Pathogen Genomics Lab King Abdulah University of Science and Technology(KAUST)                                                                                     | Sharif Hala.Fadwa Aclat Alhan Alnomai, Asim Khogeer, Sara Mfarrej, Khalid Alghamhi, Raeece Naeeem, Amr Kumar Suduth.Fathia Ben-Rached, Rahul Salunke, Anwar Hashem, Naf Almontashhi, Anab Pain                                                                                                                                                                                 |
| EPI_ISL_437713 | hCoV-19/Saudi Arabia/KAUST-Makkah203/2020 | Asia / Saudi Arabia / Makkah              | 2020-04-14 | Pathogen Genomics Lab King Abdulah University of Science and Technology(KAUST)                                                           | Pathogen Genomics Lab King Abdulah University of Science and Technology(KAUST)                                                                                     | Sharif Hala.Fadwa Aclat Alhan Alnomai, Asim Khogeer, Sara Mfarrej, Khalid Alghamhi, Raeece Naeeem, Amr Kumar Suduth.Fathia Ben-Rached, Rahul Salunke, Anwar Hashem, Naf Almontashhi, Anab Pain                                                                                                                                                                                 |



|                |                                          |                                                     |            |                                                                                   |                                                                                                        |                                                                                                                                                                                                                                                                                                                                                                                                                                                                                                       |
|----------------|------------------------------------------|-----------------------------------------------------|------------|-----------------------------------------------------------------------------------|--------------------------------------------------------------------------------------------------------|-------------------------------------------------------------------------------------------------------------------------------------------------------------------------------------------------------------------------------------------------------------------------------------------------------------------------------------------------------------------------------------------------------------------------------------------------------------------------------------------------------|
| EPI_ISL_437919 | hCoV-19/Austria/CeMM0030/2020            | Europe / Austria / Ischgl                           | 2020-03-09 | Institut für Virologie am Department für Hygiene, Mikrobiologie und Public Health | Berghalter laboratory, CeMM Research Center for Molecular Medicine of the Austrian Academy of Sciences | Alexandra Popa, Benedikt Agner, Henrique Colaco, Lukas Endler, Jakob-Wendelin Genger, Alexander Lercher, Mark Smyth, Thomas Penz, Michael Schuster, Jan Laine, Martin Senekowitsch, Judith Aberle, Stephan Aberle, Elisabeth Puchhammer-Schoedl, Manfred Naiz, Guenter Weiss, Wegene Borena, Dorothee von Lær, Christoph Bock, Andreas Berghalter                                                                                                                                                     |
| EPI_ISL_437920 | hCoV-19/Austria/CeMM0031/2020            | Europe / Austria / Ischgl                           | 2020-03-09 | Institut für Virologie am Department für Hygiene, Mikrobiologie und Public Health | Berghalter laboratory, CeMM Research Center for Molecular Medicine of the Austrian Academy of Sciences | Alexandra Popa, Benedikt Agner, Henrique Colaco, Lukas Endler, Jakob-Wendelin Genger, Alexander Lercher, Mark Smyth, Thomas Penz, Michael Schuster, Jan Laine, Martin Senekowitsch, Judith Aberle, Stephan Aberle, Elisabeth Puchhammer-Schoedl, Manfred Naiz, Guenter Weiss, Wegene Borena, Dorothee von Lær, Christoph Bock, Andreas Berghalter                                                                                                                                                     |
| EPI_ISL_437921 | hCoV-19/Austria/CeMM0032/2020            | Europe / Austria / Ischgl                           | 2020-03-12 | Institut für Virologie am Department für Hygiene, Mikrobiologie und Public Health | Berghalter laboratory, CeMM Research Center for Molecular Medicine of the Austrian Academy of Sciences | Alexandra Popa, Benedikt Agner, Henrique Colaco, Lukas Endler, Jakob-Wendelin Genger, Alexander Lercher, Mark Smyth, Thomas Penz, Michael Schuster, Jan Laine, Martin Senekowitsch, Judith Aberle, Stephan Aberle, Elisabeth Puchhammer-Schoedl, Manfred Naiz, Guenter Weiss, Wegene Borena, Dorothee von Lær, Christoph Bock, Andreas Berghalter                                                                                                                                                     |
| EPI_ISL_437922 | hCoV-19/Austria/CeMM0033/2020            | Europe / Austria / Ischgl                           | 2020-03-12 | Institut für Virologie am Department für Hygiene, Mikrobiologie und Public Health | Berghalter laboratory, CeMM Research Center for Molecular Medicine of the Austrian Academy of Sciences | Alexandra Popa, Benedikt Agner, Henrique Colaco, Lukas Endler, Jakob-Wendelin Genger, Alexander Lercher, Mark Smyth, Thomas Penz, Michael Schuster, Jan Laine, Martin Senekowitsch, Judith Aberle, Stephan Aberle, Elisabeth Puchhammer-Schoedl, Manfred Naiz, Guenter Weiss, Wegene Borena, Dorothee von Lær, Christoph Bock, Andreas Berghalter                                                                                                                                                     |
| EPI_ISL_438548 | hCoV-19/Indonesia/MRNIUPH_01-456/2020    | Asia / Indonesia / Tangerang                        | 2020-03    | Siloam Hospital Lippo Village                                                     | Mochtar Riady Institute for Nanotechnology-Universitas Pelita Harapan                                  | Akzar C Lages, David Rustandi, Febi Andriani, Ivel M Surjanaparta, Riska N Taufik, Tri Shinta Kumah, Iwawa Yusuf                                                                                                                                                                                                                                                                                                                                                                                      |
| EPI_ISL_438548 | hCoV-19/Indonesia/MRNIUPH_02-456/2020    | Asia / Indonesia / Tangerang                        | 2020-03    | Siloam Hospital Lippo Village                                                     | Mochtar Riady Institute for Nanotechnology-Universitas Pelita Harapan                                  | Akzar C Lages, David Rustandi, Febi Andriani, Ivel M Surjanaparta, Riska N Taufik, Tri Shinta Kumah, Iwawa Yusuf                                                                                                                                                                                                                                                                                                                                                                                      |
| EPI_ISL_444022 | hCoV-19/USA/TX_GCD_192000003/2020        | North America / USA / Texas / Houston               | 2020-03-18 | Baylor College of Medicine                                                        | Baylor College of Medicine: HGSC                                                                       | Doddapaneni, Donna Muzny, Qingchang Meng, Huo Chao, Zhenen Morin, Hua Shen, George Weissenberger, Kanya Kottapalli, Yimil Meherguel, Sagar Sarsi, Ginger McElair, Vipin Menon, Sara J.J. Creggen, Matthew C. Ross, Tulin Ayvaz, Richard Sugand, Kristi L. Hoffman, Matthew Wong, Joseph F. Petrakino                                                                                                                                                                                                  |
| EPI_ISL_444027 | hCoV-19/Hong Kong/VM20009044/2020        | Asia / Hong Kong                                    | 2020-04-04 | Pamela Youde Nethersole Eastern Hospital                                          | Hong Kong Department of Health                                                                         | Mak Gannon C.K., Cheng Peter K.C., Lam Edman T.K., Chan Rickjason C.W., Tsang Dominic N.C.                                                                                                                                                                                                                                                                                                                                                                                                            |
| EPI_ISL_444028 | hCoV-19/Hong Kong/VM20009043/2020        | Asia / Hong Kong                                    | 2020-04-05 | Queen Elizabeth Hospital                                                          | Hong Kong Department of Health                                                                         | Mak Gannon C.K., Cheng Peter K.C., Lam Edman T.K., Chan Rickjason C.W., Tsang Dominic N.C.                                                                                                                                                                                                                                                                                                                                                                                                            |
| EPI_ISL_444029 | hCoV-19/Hong Kong/VM20009010/2020        | Asia / Hong Kong                                    | 2020-04-06 | Prince of Wales Hospital                                                          | Hong Kong Department of Health                                                                         | Mak Gannon C.K., Cheng Peter K.C., Lam Edman T.K., Chan Rickjason C.W., Tsang Dominic N.C.                                                                                                                                                                                                                                                                                                                                                                                                            |
| EPI_ISL_444030 | hCoV-19/Hong Kong/VM20009097/2020        | Asia / Hong Kong                                    | 2020-04-06 | United Christian Hospital                                                         | Hong Kong Department of Health                                                                         | Mak Gannon C.K., Cheng Peter K.C., Lam Edman T.K., Chan Rickjason C.W., Tsang Dominic N.C.                                                                                                                                                                                                                                                                                                                                                                                                            |
| EPI_ISL_444031 | hCoV-19/Hong Kong/VM20009017/2020        | Asia / Hong Kong                                    | 2020-04-06 | Queen Mary Hospital                                                               | Hong Kong Department of Health                                                                         | Mak Gannon C.K., Cheng Peter K.C., Lam Edman T.K., Chan Rickjason C.W., Tsang Dominic N.C.                                                                                                                                                                                                                                                                                                                                                                                                            |
| EPI_ISL_444032 | hCoV-19/Hong Kong/VM20009111/2020        | Asia / Hong Kong                                    | 2020-04-05 | North Lantau Hospital                                                             | Hong Kong Department of Health                                                                         | Mak Gannon C.K., Cheng Peter K.C., Lam Edman T.K., Chan Rickjason C.W., Tsang Dominic N.C.                                                                                                                                                                                                                                                                                                                                                                                                            |
| EPI_ISL_444033 | hCoV-19/Hong Kong/VM200090614/2020       | Asia / Hong Kong                                    | 2020-04-06 | Queen Mary Hospital                                                               | Hong Kong Department of Health                                                                         | Mak Gannon C.K., Cheng Peter K.C., Lam Edman T.K., Chan Rickjason C.W., Tsang Dominic N.C.                                                                                                                                                                                                                                                                                                                                                                                                            |
| EPI_ISL_444034 | hCoV-19/Hong Kong/VM200090280/2020       | Asia / Hong Kong                                    | 2020-04-06 | Prince of Wales Hospital                                                          | Hong Kong Department of Health                                                                         | Mak Gannon C.K., Cheng Peter K.C., Lam Edman T.K., Chan Rickjason C.W., Tsang Dominic N.C.                                                                                                                                                                                                                                                                                                                                                                                                            |
| EPI_ISL_444035 | hCoV-19/Hong Kong/VM20009037/2020        | Asia / Hong Kong                                    | 2020-04-05 | Princess Margaret Hospital                                                        | Hong Kong Department of Health                                                                         | Mak Gannon C.K., Cheng Peter K.C., Lam Edman T.K., Chan Rickjason C.W., Tsang Dominic N.C.                                                                                                                                                                                                                                                                                                                                                                                                            |
| EPI_ISL_444036 | hCoV-19/Hong Kong/VM20009013/2020        | Asia / Hong Kong                                    | 2020-04-06 | North Lantau Hospital                                                             | Hong Kong Department of Health                                                                         | Mak Gannon C.K., Cheng Peter K.C., Lam Edman T.K., Chan Rickjason C.W., Tsang Dominic N.C.                                                                                                                                                                                                                                                                                                                                                                                                            |
| EPI_ISL_444037 | hCoV-19/Hong Kong/VM200090604/2020       | Asia / Hong Kong                                    | 2020-04-06 | Hong Kong Adventist Hospital                                                      | Hong Kong Department of Health                                                                         | Mak Gannon C.K., Cheng Peter K.C., Lam Edman T.K., Chan Rickjason C.W., Tsang Dominic N.C.                                                                                                                                                                                                                                                                                                                                                                                                            |
| EPI_ISL_444038 | hCoV-19/Hong Kong/VM200090654/2020       | Asia / Hong Kong                                    | 2020-04-05 | Princess Margaret Hospital                                                        | Hong Kong Department of Health                                                                         | Mak Gannon C.K., Cheng Peter K.C., Lam Edman T.K., Chan Rickjason C.W., Tsang Dominic N.C.                                                                                                                                                                                                                                                                                                                                                                                                            |
| EPI_ISL_444039 | hCoV-19/Hong Kong/VM20010011/2020        | Asia / Hong Kong                                    | 2020-04-08 | United Christian Hospital                                                         | Hong Kong Department of Health                                                                         | Mak Gannon C.K., Cheng Peter K.C., Lam Edman T.K., Chan Rickjason C.W., Tsang Dominic N.C.                                                                                                                                                                                                                                                                                                                                                                                                            |
| EPI_ISL_444040 | hCoV-19/Hong Kong/VM20010007/2020        | Asia / Hong Kong                                    | 2020-04-07 | Queen Elizabeth Hospital                                                          | Hong Kong Department of Health                                                                         | Mak Gannon C.K., Cheng Peter K.C., Lam Edman T.K., Chan Rickjason C.W., Tsang Dominic N.C.                                                                                                                                                                                                                                                                                                                                                                                                            |
| EPI_ISL_444041 | hCoV-19/Hong Kong/VM20010020/2020        | Asia / Hong Kong                                    | 2020-04-07 | Tuen Mun Hospital                                                                 | Hong Kong Department of Health                                                                         | Mak Gannon C.K., Cheng Peter K.C., Lam Edman T.K., Chan Rickjason C.W., Tsang Dominic N.C.                                                                                                                                                                                                                                                                                                                                                                                                            |
| EPI_ISL_444042 | hCoV-19/Hong Kong/VM20010017/2020        | Asia / Hong Kong                                    | 2020-04-07 | Pamela Youde Nethersole Eastern Hospital                                          | Hong Kong Department of Health                                                                         | Mak Gannon C.K., Cheng Peter K.C., Lam Edman T.K., Chan Rickjason C.W., Tsang Dominic N.C.                                                                                                                                                                                                                                                                                                                                                                                                            |
| EPI_ISL_444043 | hCoV-19/Hong Kong/VM20010018/2020        | Asia / Hong Kong                                    | 2020-04-07 | Pamela Youde Nethersole Eastern Hospital                                          | Hong Kong Department of Health                                                                         | Mak Gannon C.K., Cheng Peter K.C., Lam Edman T.K., Chan Rickjason C.W., Tsang Dominic N.C.                                                                                                                                                                                                                                                                                                                                                                                                            |
| EPI_ISL_444044 | hCoV-19/Hong Kong/VM20010030/2020        | Asia / Hong Kong                                    | 2020-04-07 | Yan Chai Hospital                                                                 | Hong Kong Department of Health                                                                         | Mak Gannon C.K., Cheng Peter K.C., Lam Edman T.K., Chan Rickjason C.W., Tsang Dominic N.C.                                                                                                                                                                                                                                                                                                                                                                                                            |
| EPI_ISL_444045 | hCoV-19/Hong Kong/VM20010005/2020        | Asia / Hong Kong                                    | 2020-04-07 | Queen Elizabeth Hospital                                                          | Hong Kong Department of Health                                                                         | Mak Gannon C.K., Cheng Peter K.C., Lam Edman T.K., Chan Rickjason C.W., Tsang Dominic N.C.                                                                                                                                                                                                                                                                                                                                                                                                            |
| EPI_ISL_444046 | hCoV-19/Hong Kong/VM20010006/2020        | Asia / Hong Kong                                    | 2020-04-07 | Queen Elizabeth Hospital                                                          | Hong Kong Department of Health                                                                         | Mak Gannon C.K., Cheng Peter K.C., Lam Edman T.K., Chan Rickjason C.W., Tsang Dominic N.C.                                                                                                                                                                                                                                                                                                                                                                                                            |
| EPI_ISL_444047 | hCoV-19/Hong Kong/VM20009034/2020        | Asia / Hong Kong                                    | 2020-04-04 | United Christian Hospital                                                         | Hong Kong Department of Health                                                                         | Mak Gannon C.K., Cheng Peter K.C., Lam Edman T.K., Chan Rickjason C.W., Tsang Dominic N.C.                                                                                                                                                                                                                                                                                                                                                                                                            |
| EPI_ISL_444048 | hCoV-19/Hong Kong/VM20009042/2020        | Asia / Hong Kong                                    | 2020-04-04 | Queen Elizabeth Hospital                                                          | Hong Kong Department of Health                                                                         | Mak Gannon C.K., Cheng Peter K.C., Lam Edman T.K., Chan Rickjason C.W., Tsang Dominic N.C.                                                                                                                                                                                                                                                                                                                                                                                                            |
| EPI_ISL_444049 | hCoV-19/Hong Kong/VM20009039/2020        | Asia / Hong Kong                                    | 2020-04-04 | North Lantau Hospital                                                             | Hong Kong Department of Health                                                                         | Mak Gannon C.K., Cheng Peter K.C., Lam Edman T.K., Chan Rickjason C.W., Tsang Dominic N.C.                                                                                                                                                                                                                                                                                                                                                                                                            |
| EPI_ISL_444050 | hCoV-19/Hong Kong/VB20006033/2020        | Asia / Hong Kong                                    | 2020-04-07 | Shek Wu Hui Jockey Club General Out-patient Clinic                                | Hong Kong Department of Health                                                                         | Mak Gannon C.K., Cheng Peter K.C., Lam Edman T.K., Chan Rickjason C.W., Tsang Dominic N.C.                                                                                                                                                                                                                                                                                                                                                                                                            |
| EPI_ISL_444456 | hCoV-19/India/GBRCC25/2020               | Asia / India / Gujarat / Ahmedabad                  | 2020-04-26 | B.J. Medical College and Civil Hospital                                           | Gujarat Biotechnology Research Centre                                                                  | R D Dixit, Snehal Bagatharia, Kamlesh J Upadhyay, Ramesh Pandit, Tejas Shah, Ankit Hrao, Pritesh Salbara, Apurvasmiti Puvur, Janvi Rawal, Monika Gandhi, Pinal Trivedi, Maheshwar Pandey, Anil Kanani, Anurakta Verma, Niran Savanya, Rajagendra Kumar, Dinesh Kumar, Zubair Sayed, Diak Kharwal, Disha Patel, Binila Aring, Neelja Khandekar, Geeta Vaghela, Sonia Bhave, Bhawesh Modi, Karan Joshi, Gaurishankar Shrivastava, Nidhi Sood, Pranay Shah, Pooja P Doshi, Chaitanya Joshi, Madhvi Joshi |
| EPI_ISL_444469 | hCoV-19/Guangdong/SYSU-IH/2020           | Asia / China / Guangdong / Guangzhou                | 2020-04-16 | Guangzhou Eighth People's Hospital (Jiahe Sector)                                 | Institute of Human Virology, Zhongshan School of Medicine, Sun Yat-sen University                      | Junrong Zhang, Fei Yu, Jun Liu, Huimin Fan, Ruoxu Ying, Feng Huang, Ting Pan, Jingling Lu, Yiren Zhang, Xu Zhang, Meng Shi, Fengyu Hu, Feng Li, Kai Deng, Hui Zhang                                                                                                                                                                                                                                                                                                                                   |
| EPI_ISL_444494 | hCoV-19/USA/CA_NHRC_01/2020              | North America / USA / California                    | 2020-03-11 | Naval Health Research Center                                                      | Naval Medical Research Center Biological Defense Research Directorate                                  | Logan Voegtly, Regina Cer, Desairie Pena-Gomez, Adrian Paskey-Kyle Long, Roger Pan, Melinda Balansay-Ames, Chris Myers, Ewell Hollis, Nathaniel Christy, Kimberly Bishop-Lilly                                                                                                                                                                                                                                                                                                                        |
| EPI_ISL_444495 | hCoV-19/USA/SC_NHRC_01/2020              | North America / USA / South Carolina                | 2020-03-27 | Naval Health Research Center                                                      | Naval Medical Research Center Biological Defense Research Directorate                                  | Logan Voegtly, Regina Cer, Desairie Pena-Gomez, Adrian Paskey-Kyle Long, Roger Pan, Melinda Balansay-Ames, Chris Myers, Ewell Hollis, Nathaniel Christy, Kimberly Bishop-Lilly                                                                                                                                                                                                                                                                                                                        |
| EPI_ISL_444496 | hCoV-19/USA/SC_NHRC_02/2020              | North America / USA / South Carolina                | 2020-03-27 | Naval Health Research Center                                                      | Naval Medical Research Center Biological Defense Research Directorate                                  | Logan Voegtly, Regina Cer, Desairie Pena-Gomez, Adrian Paskey-Kyle Long, Roger Pan, Melinda Balansay-Ames, Chris Myers, Ewell Hollis, Nathaniel Christy, Kimberly Bishop-Lilly                                                                                                                                                                                                                                                                                                                        |
| EPI_ISL_444498 | hCoV-19/Guam/GU_NHG_01/2020              | Oceania / Guam                                      | 2020-03-26 | Naval Health Research Center                                                      | Naval Medical Research Center Biological Defense Research Directorate                                  | Logan Voegtly, Regina Cer, Desairie Pena-Gomez, Adrian Paskey-Kyle Long, Roger Pan, Melinda Balansay-Ames, Chris Myers, Ewell Hollis, Nathaniel Christy, Kimberly Bishop-Lilly                                                                                                                                                                                                                                                                                                                        |
| EPI_ISL_447280 | hCoV-19/Israel/70100255/2020             | Asia / Israel / South Coast District                | 2020-03-26 | Microbiology Division, Barzilai University Medical Center                         | Stem Lab                                                                                               | Andrey Komissarov, Artem Fadeev, Maria Sergeeva, Anna Ivanova, Tania Musaveva, Ksenia Komissarova, Maria Timofeeva, Veronica Eder, Maria Pisareva, Daria Danilenko                                                                                                                                                                                                                                                                                                                                    |
| EPI_ISL_447291 | hCoV-19/Israel/70100256/2020             | Asia / Israel / South Coast District                | 2020-03-26 | Microbiology Division, Barzilai University Medical Center                         | Stem Lab                                                                                               | Andrey Komissarov, Artem Fadeev, Maria Sergeeva, Anna Ivanova, Tania Musaveva, Ksenia Komissarova, Maria Timofeeva, Veronica Eder, Maria Pisareva, Daria Danilenko                                                                                                                                                                                                                                                                                                                                    |
| EPI_ISL_447292 | hCoV-19/Israel/70100254/2020             | Asia / Israel / South Coast District                | 2020-03-25 | Microbiology Division, Barzilai University Medical Center                         | Stem Lab                                                                                               | Andrey Komissarov, Artem Fadeev, Maria Sergeeva, Anna Ivanova, Tania Musaveva, Ksenia Komissarova, Maria Timofeeva, Veronica Eder, Maria Pisareva, Daria Danilenko                                                                                                                                                                                                                                                                                                                                    |
| EPI_ISL_447293 | hCoV-19/Israel/70100253/2020             | Asia / Israel / South Coast District                | 2020-03-25 | Microbiology Division, Barzilai University Medical Center                         | Stem Lab                                                                                               | Andrey Komissarov, Artem Fadeev, Maria Sergeeva, Anna Ivanova, Tania Musaveva, Ksenia Komissarova, Maria Timofeeva, Veronica Eder, Maria Pisareva, Daria Danilenko                                                                                                                                                                                                                                                                                                                                    |
| EPI_ISL_447294 | hCoV-19/Israel/70100254/2020             | Asia / Israel / South Coast District                | 2020-03-25 | Microbiology Division, Barzilai University Medical Center                         | Stem Lab                                                                                               | Andrey Komissarov, Artem Fadeev, Maria Sergeeva, Anna Ivanova, Tania Musaveva, Ksenia Komissarova, Maria Timofeeva, Veronica Eder, Maria Pisareva, Daria Danilenko                                                                                                                                                                                                                                                                                                                                    |
| EPI_ISL_447295 | hCoV-19/Israel/70100248/2020             | Asia / Israel / South Coast District                | 2020-03-25 | Microbiology Division, Barzilai University Medical Center                         | Stem Lab                                                                                               | Andrey Komissarov, Artem Fadeev, Maria Sergeeva, Anna Ivanova, Tania Musaveva, Ksenia Komissarova, Maria Timofeeva, Veronica Eder, Maria Pisareva, Daria Danilenko                                                                                                                                                                                                                                                                                                                                    |
| EPI_ISL_447296 | hCoV-19/Israel/70100246/2020             | Asia / Israel / South Coast District                | 2020-03-24 | Microbiology Division, Barzilai University Medical Center                         | Stem Lab                                                                                               | Andrey Komissarov, Artem Fadeev, Maria Sergeeva, Anna Ivanova, Tania Musaveva, Ksenia Komissarova, Maria Timofeeva, Veronica Eder, Maria Pisareva, Daria Danilenko                                                                                                                                                                                                                                                                                                                                    |
| EPI_ISL_447297 | hCoV-19/Israel/70100245/2020             | Asia / Israel / South Coast District                | 2020-03-24 | Microbiology Division, Barzilai University Medical Center                         | Stem Lab                                                                                               | Andrey Komissarov, Artem Fadeev, Maria Sergeeva, Anna Ivanova, Tania Musaveva, Ksenia Komissarova, Maria Timofeeva, Veronica Eder, Maria Pisareva, Daria Danilenko                                                                                                                                                                                                                                                                                                                                    |
| EPI_ISL_447298 | hCoV-19/Israel/70100245/2020             | Asia / Israel / South Coast District                | 2020-03-24 | Microbiology Division, Barzilai University Medical Center                         | Stem Lab                                                                                               | Andrey Komissarov, Artem Fadeev, Maria Sergeeva, Anna Ivanova, Tania Musaveva, Ksenia Komissarova, Maria Timofeeva, Veronica Eder, Maria Pisareva, Daria Danilenko                                                                                                                                                                                                                                                                                                                                    |
| EPI_ISL_447299 | hCoV-19/Israel/70100245/2020             | Asia / Israel / South Coast District                | 2020-03-24 | Microbiology Division, Barzilai University Medical Center                         | Stem Lab                                                                                               | Andrey Komissarov, Artem Fadeev, Maria Sergeeva, Anna Ivanova, Tania Musaveva, Ksenia Komissarova, Maria Timofeeva, Veronica Eder, Maria Pisareva, Daria Danilenko                                                                                                                                                                                                                                                                                                                                    |
| EPI_ISL_450241 | hCoV-19/Russia/SiPetersburg/R162519/2020 | Europe / Russia / Saint-Petersburg                  | 2020-04-15 | WHO National Influenza Centre Russian Federation                                  | WHO National Influenza Centre Russian Federation                                                       | Andrey Komissarov, Artem Fadeev, Maria Sergeeva, Anna Ivanova, Tania Musaveva, Ksenia Komissarova, Maria Timofeeva, Veronica Eder, Maria Pisareva, Daria Danilenko                                                                                                                                                                                                                                                                                                                                    |
| EPI_ISL_450242 | hCoV-19/Russia/SiPetersburg/R16704V/2020 | Europe / Russia / Saint-Petersburg                  | 2020-04-16 | WHO National Influenza Centre Russian Federation                                  | WHO National Influenza Centre Russian Federation                                                       | Andrey Komissarov, Artem Fadeev, Maria Sergeeva, Anna Ivanova, Tania Musaveva, Ksenia Komissarova, Maria Timofeeva, Veronica Eder, Maria Pisareva, Daria Danilenko                                                                                                                                                                                                                                                                                                                                    |
| EPI_ISL_450243 | hCoV-19/Russia/SiPetersburg/R16730V/2020 | Europe / Russia / Saint-Petersburg                  | 2020-04-16 | WHO National Influenza Centre Russian Federation                                  | WHO National Influenza Centre Russian Federation                                                       | Andrey Komissarov, Artem Fadeev, Maria Sergeeva, Anna Ivanova, Tania Musaveva, Ksenia Komissarova, Maria Timofeeva, Veronica Eder, Maria Pisareva, Daria Danilenko                                                                                                                                                                                                                                                                                                                                    |
| EPI_ISL_450244 | hCoV-19/Russia/SiPetersburg/R16840S/2020 | Europe / Russia / Saint-Petersburg                  | 2020-04-15 | WHO National Influenza Centre Russian Federation                                  | WHO National Influenza Centre Russian Federation                                                       | Andrey Komissarov, Artem Fadeev, Maria Sergeeva, Anna Ivanova, Tania Musaveva, Ksenia Komissarova, Maria Timofeeva, Veronica Eder, Maria Pisareva, Daria Danilenko                                                                                                                                                                                                                                                                                                                                    |
| EPI_ISL_450245 | hCoV-19/Russia/SiPetersburg/R16846V/2020 | Europe / Russia / Saint-Petersburg                  | 2020-04-15 | WHO National Influenza Centre Russian Federation                                  | WHO National Influenza Centre Russian Federation                                                       | Andrey Komissarov, Artem Fadeev, Maria Sergeeva, Anna Ivanova, Tania Musaveva, Ksenia Komissarova, Maria Timofeeva, Veronica Eder, Maria Pisareva, Daria Danilenko                                                                                                                                                                                                                                                                                                                                    |
| EPI_ISL_450246 | hCoV-19/Russia/Kpmer/RI6907V/2020        | Europe / Russia / Leningrad region / Kope2020-04-19 | 2020-04-19 | WHO National Influenza Centre Russian Federation                                  | WHO National Influenza Centre Russian Federation                                                       | Andrey Komissarov, Artem Fadeev, Maria Sergeeva, Anna Ivanova, Tania Musaveva, Ksenia Komissarova, Maria Timofeeva, Veronica Eder, Maria Pisareva, Daria Danilenko                                                                                                                                                                                                                                                                                                                                    |
| EPI_ISL_450247 | hCoV-19/Russia/SiPetersburg/R17039V/2020 | Europe / Russia / Saint-Petersburg                  | 2020-04-16 | WHO National Influenza Centre Russian Federation                                  | WHO National Influenza Centre Russian Federation                                                       | Andrey Komissarov, Artem Fadeev, Maria Sergeeva, Anna Ivanova, Tania Musaveva, Ksenia Komissarova, Maria Timofeeva, Veronica Eder, Maria Pisareva, Daria Danilenko                                                                                                                                                                                                                                                                                                                                    |
| EPI_ISL_450248 | hCoV-19/Russia/SiPetersburg/R17318V/2020 | Europe / Russia / Saint-Petersburg                  | 2020-04-21 | WHO National Influenza Centre Russian Federation                                  | WHO National Influenza Centre Russian Federation                                                       | Andrey Komissarov, Artem Fadeev, Maria Sergeeva, Anna Ivanova, Tania Musaveva, Ksenia Komissarova, Maria Timofeeva, Veronica Eder, Maria Pisareva, Daria Danilenko                                                                                                                                                                                                                                                                                                                                    |
| EPI_ISL_450249 | hCoV-19/Russia/SiPetersburg/R17319V/2020 | Europe / Russia / Saint-Petersburg                  | 2020-04-21 | WHO National Influenza Centre Russian Federation                                  | WHO National Influenza Centre Russian Federation                                                       | Andrey Komissarov, Artem Fadeev, Maria Sergeeva, Anna Ivanova, Tania Musaveva, Ksenia Komissarova, Maria Timofeeva, Veronica Eder, Maria Pisareva, Daria Danilenko                                                                                                                                                                                                                                                                                                                                    |
| EPI_ISL_450250 | hCoV-19/Russia/SiPetersburg/R17321V/2020 | Europe / Russia / Saint-Petersburg                  | 2020-04-21 | WHO National Influenza Centre Russian Federation                                  | WHO National Influenza Centre Russian Federation                                                       | Andrey Komissarov, Artem Fadeev, Maria Sergeeva, Anna Ivanova, Tania Musaveva, Ksenia Komissarova, Maria Timofeeva, Veronica Eder, Maria Pisareva, Daria Danilenko                                                                                                                                                                                                                                                                                                                                    |
| EPI_ISL_450251 | hCoV-19/Russia/SiPetersburg/R17340V/2020 | Europe / Russia / Saint-Petersburg                  | 2020-04-20 | WHO National Influenza Centre Russian Federation                                  | WHO National Influenza Centre Russian Federation                                                       | Andrey Komissarov, Artem Fadeev, Maria Sergeeva, Anna Ivanova, Tania Musaveva, Ksenia Komissarova, Maria Timofeeva, Veronica Eder, Maria Pisareva, Daria Danilenko                                                                                                                                                                                                                                                                                                                                    |
| EPI_ISL_450252 | hCoV-19/Russia/SiPetersburg/R17464S/2020 | Europe / Russia / Saint-Petersburg                  | 2020-04-20 | WHO National Influenza Centre Russian Federation                                  | WHO National Influenza Centre Russian Federation                                                       | Andrey Komissarov, Artem Fadeev, Maria Sergeeva, Anna Ivanova, Tania Musaveva, Ksenia Komissarova, Maria Timofeeva, Veronica Eder, Maria Pisareva, Daria Danilenko                                                                                                                                                                                                                                                                                                                                    |
| EPI_ISL_450253 | hCoV-19/Russia/SiPetersburg/R17485S/2020 | Europe / Russia / Saint-Petersburg                  | 2020-04-20 | WHO National Influenza Centre Russian Federation                                  | WHO National Influenza Centre Russian Federation                                                       | Andrey Komissarov, Artem Fadeev, Maria Sergeeva, Anna Ivanova, Tania Musaveva, Ksenia Komissarova, Maria Timofeeva, Veronica Eder, Maria Pisareva, Daria Danilenko                                                                                                                                                                                                                                                                                                                                    |
| EPI_ISL_450254 | hCoV-19/Russia/SiPetersburg/R17501S/2020 | Europe / Russia / Saint-Petersburg                  | 2020-04-20 | WHO National Influenza Centre Russian Federation                                  | WHO National Influenza Centre Russian Federation                                                       | Andrey Komissarov, Artem Fadeev, Maria Sergeeva, Anna Ivanova, Tania Musaveva, Ksenia Komissarova, Maria Timofeeva, Veronica Eder, Maria Pisareva, Daria Danilenko                                                                                                                                                                                                                                                                                                                                    |
| EPI_ISL_450255 | hCoV-19/Russia/SiPetersburg/R17505S/2020 | Europe / Russia / Saint-Petersburg                  | 2020-04-20 | WHO National Influenza Centre Russian Federation                                  | WHO National Influenza Centre Russian Federation                                                       | Andrey Komissarov, Artem Fadeev, Maria Sergeeva, Anna Ivanova, Tania Musaveva, Ksenia Komissarova, Maria Timofeeva, Veronica Eder, Maria Pisareva, Daria Danilenko                                                                                                                                                                                                                                                                                                                                    |
| EPI_ISL_450256 | hCoV-19/Russia/SiPetersburg/R17520S/2020 | Europe / Russia / Saint-Petersburg                  | 2020-04-20 | WHO National Influenza Centre Russian Federation                                  | WHO National Influenza Centre Russian Federation                                                       | Andrey Komissarov, Artem Fadeev, Maria Sergeeva, Anna Ivanova, Tania Musaveva, Ksenia Komissarova, Maria Timofeeva, Veronica Eder, Maria Pisareva, Daria Danilenko                                                                                                                                                                                                                                                                                                                                    |
| EPI_ISL_450257 | hCoV-19/Russia/SiPetersburg/R17545S/2020 | Europe / Russia / Saint-Petersburg                  | 2020-04-20 | WHO National Influenza Centre Russian Federation                                  | WHO National Influenza Centre Russian Federation                                                       | Andrey Komissarov, Artem Fadeev, Maria Sergeeva, Anna Ivanova, Tania Musaveva, Ksenia Komissarova, Maria Timofeeva, Veronica Eder, Maria Pisareva, Daria Danilenko                                                                                                                                                                                                                                                                                                                                    |
| EPI_ISL_450258 | hCoV-19/Russia/SiPetersburg/R17553S/2020 | Europe / Russia / Saint-Petersburg                  | 2020-04-21 | WHO National Influenza Centre Russian Federation                                  | WHO National Influenza Centre Russian Federation                                                       | Andrey Komissarov, Artem Fadeev, Maria Sergeeva, Anna Ivanova, Tania Musaveva, Ksenia Komissarova, Maria Timofeeva, Veronica Eder, Maria Pisareva, Daria Danilenko                                                                                                                                                                                                                                                                                                                                    |
| EPI_ISL_450259 | hCoV-19/Russia/SiPetersburg/R17555S/2020 | Europe / Russia / Saint-Petersburg                  | 2020-04-21 | WHO National Influenza Centre Russian Federation                                  | WHO National Influenza Centre Russian Federation                                                       | Andrey Komissarov, Artem Fadeev, Maria Sergeeva, Anna Ivanova, Tania Musaveva, Ksenia Komissarova, Maria Timofeeva, Veronica Eder, Maria Pisareva, Daria Danilenko                                                                                                                                                                                                                                                                                                                                    |
| EPI_ISL_450260 | hCoV-19/Russia/SiPetersburg/R17575S/2020 | Europe / Russia / Saint-Petersburg                  | 2020-04-21 | WHO National Influenza Centre Russian Federation                                  | WHO National Influenza Centre Russian Federation                                                       | Andrey Komissarov, Artem Fadeev, Maria Sergeeva, Anna Ivanova, Tania Musaveva, Ksenia Komissarova, Maria Timofeeva, Veronica Eder, Maria Pisareva, Daria Danilenko                                                                                                                                                                                                                                                                                                                                    |
| EPI_ISL_450261 | hCoV-19/Russia/SiPetersburg/R17581S/2020 | Europe / Russia / Saint-Petersburg                  | 2020-04-21 | WHO National Influenza Centre Russian Federation                                  | WHO National Influenza Centre Russian Federation                                                       | Andrey Komissarov, Artem Fadeev, Maria Sergeeva, Anna Ivanova, Tania Musaveva, Ksenia Komissarova, Maria Timofeeva, Veronica Eder, Maria Pisareva, Daria Danilenko                                                                                                                                                                                                                                                                                                                                    |
| EPI_ISL_450262 | hCoV-19/Russia/SiPetersburg/R17594S/2020 | Europe / Russia / Saint-Petersburg                  | 2020-04-21 | WHO National Influenza Centre Russian Federation                                  | WHO National Influenza Centre Russian Federation                                                       | Andrey Komissarov, Artem Fadeev, Maria Sergeeva, Anna Ivanova, Tania Musaveva, Ksenia Komissarova, Maria Timofeeva, Veronica Eder, Maria Pisareva, Daria Danilenko                                                                                                                                                                                                                                                                                                                                    |
| EPI_ISL_450263 | hCoV-19/Russia/SiPetersburg/R17603S/2020 | Europe / Russia / Saint-Petersburg                  | 2020-04-21 | WHO National Influenza Centre Russian Federation                                  | WHO National Influenza Centre Russian Federation                                                       | Andrey Komissarov, Artem Fadeev, Maria Sergeeva, Anna Ivanova, Tania Musaveva, Ksenia Komissarova, Maria Timofeeva, Veronica Eder, Maria Pisareva, Daria Danilenko                                                                                                                                                                                                                                                                                                                                    |

Page PAGE]

|                |                               |                                |            |                                         |                                         |
|----------------|-------------------------------|--------------------------------|------------|-----------------------------------------|-----------------------------------------|
| EPI_ISL_454497 | hCoV-19/Kazakhstan/16173/2020 | Asia / Kazakhstan / Nur-Sultan | 2020-05-14 | RSE "National Center for Biotechnology" | RSE "National Center for Biotechnology" |
|----------------|-------------------------------|--------------------------------|------------|-----------------------------------------|-----------------------------------------|

Abdaliyev, Akbala Rakhimovna, Zabira Roshnakhmetova, Russian Calendar, Tienan Ramankulov

|                |                                       |                                    |            |                                                                                                                                |                                                                                   |                                                                                                                                                                                                                                                                                                                                                                                                                                                                      |
|----------------|---------------------------------------|------------------------------------|------------|--------------------------------------------------------------------------------------------------------------------------------|-----------------------------------------------------------------------------------|----------------------------------------------------------------------------------------------------------------------------------------------------------------------------------------------------------------------------------------------------------------------------------------------------------------------------------------------------------------------------------------------------------------------------------------------------------------------|
| EPI_ISL_454498 | hCoV-19/Kazakhstan/16236/2020         | Asia / Kazakhstan / Nur-Sultan     | 2020-04-14 | RSE "National Center for Biotechnology"                                                                                        | RSE "National Center for Biotechnology"                                           | Alexandr Shevtsov, Iyas Akhmetbayev, Viktoriya Lutsay, Asylyan Amirgazin, Askar Abdaliev, Alibek Rakhmetova, Zaira Aushanmetova, Rustan Kalendar, Yelena Ramankulov                                                                                                                                                                                                                                                                                                  |
| EPI_ISL_454499 | hCoV-19/Kazakhstan/16537/2020         | Asia / Kazakhstan / Nur-Sultan     | 2020-04-16 | RSE "National Center for Biotechnology"                                                                                        | RSE "National Center for Biotechnology"                                           | Alexandr Shevtsov, Iyas Akhmetbayev, Viktoriya Lutsay, Asylyan Amirgazin, Askar Abdaliev, Alibek Rakhmetova, Zaira Aushanmetova, Rustan Kalendar, Yelena Ramankulov                                                                                                                                                                                                                                                                                                  |
| EPI_ISL_454602 | hCoV-19/Croatia/14412_Koprivnica/2020 | Europe / Croatia / Koprivnica      | 2020-04-21 | Croatian Institute of Public Health                                                                                            | University of Zagreb, Centre for research and knowledge transfer in biotechnology | Irena Tabalin, Tatjana Vilibić-Cavlek, Jelena Ivanec-Jelečki, Anamarija Stolic                                                                                                                                                                                                                                                                                                                                                                                       |
| EPI_ISL_454605 | hCoV-19/Croatia/BU-S17new/2020        | Europe / Croatia / Istria          | 2020-03-31 | Institute for Public Health                                                                                                    | Laboratory for advanced genomics                                                  | Flig Rokic, Lovro Tiggew-Gref, Neven Sudic, Tomislav Rukavina, Igor Jurak, Oliver Vugrek                                                                                                                                                                                                                                                                                                                                                                             |
| EPI_ISL_454606 | hCoV-19/Croatia/I7-S21new/2020        | Europe / Croatia / Istria          | 2020-03-30 | Institute for Public Health                                                                                                    | Laboratory for advanced genomics                                                  | Flig Rokic, Lovro Tiggew-Gref, Neven Sudic, Tomislav Rukavina, Igor Jurak, Oliver Vugrek                                                                                                                                                                                                                                                                                                                                                                             |
| EPI_ISL_455015 | hCoV-19/India/GBRC080/2020            | Asia / India / Gujarat / Rajkot    | 2020-04-28 | Pandit Deendayal Upadhyay Government Medical College, Rajkot                                                                   | Gujarat Biotechnology Research Centre                                             | Snehil Bagatharia, Prakash Modi, Sejul Antala, Manish Pattani, Ramesh Pandit, Tejas Shah, Ankit Himsu, Pritesh Sabara, Apurvash Puvur, Janvi Ravat, Zama Patel, Monika Gandhi, Pinal Trivedi, Mahesh Pandya, Amit Kanani, Nidhi Patel, Nalin Savaliya, Raghwendra Kumar, Dinesh Kumar, Zuber Sayed, Komal Patel, Labhi Pandya, Neha Nagara, Bhavesh Modi, Gaurishankar Shirmali, R D Dixit, A M Kadi, Umang Mishra, Chaitanya Joshi, Madhvi Joshi                    |
| EPI_ISL_455016 | hCoV-19/India/GBRC119/2020            | Asia / India / Gujarat / Rajkot    | 2020-04-27 | Pandit Deendayal Upadhyay Government Medical College, Rajkot                                                                   | Gujarat Biotechnology Research Centre                                             | Prakash Modi, Sejul Antala, Manish Pattani, Ramesh Pandit, Tejas Shah, Ankit Himsu, Pritesh Sabara, Apurvash Puvur, Janvi Ravat, Zama Patel, Monika Gandhi, Pinal Trivedi, Mahesh Pandya, Amit Kanani, Nidhi Patel, Nalin Savaliya, Raghwendra Kumar, Dinesh Kumar, Zuber Sayed, Komal Patel, Labhi Pandya, Snehil Bagatharia, Atul Anwar, Bhavesh Modi, Gaurishankar Shirmali, R D Dixit, A M Kadi, Umang Mishra, Chaitanya Joshi, Madhvi Joshi                     |
| EPI_ISL_455017 | hCoV-19/India/GBRC120/2020            | Asia / India / Gujarat / Vadodra   | 2020-05-02 | Government Medical College, Vadodra                                                                                            | Gujarat Biotechnology Research Centre                                             | Tanuja Javedkar, R N Daveshtwar, Ramesh Pandit, Tejas Shah, Ankit Himsu, Pritesh Sabara, Apurvash Puvur, Janvi Ravat, Zama Patel, Monika Gandhi, Pinal Trivedi, Mahesh Pandya, Amit Kanani, Nidhi Patel, Nalin Savaliya, Raghwendra Kumar, Dinesh Kumar, Zuber Sayed, Komal Patel, Labhi Pandya, Snehil Bagatharia, Feni Patel, Bhavesh Modi, Gaurishankar Shirmali, R D Dixit, A M Kadi, Umang Mishra, Chaitanya Joshi, Madhvi Joshi                                |
| EPI_ISL_455018 | hCoV-19/India/GBRC121/2020            | Asia / India / Gujarat / Vadodra   | 2020-05-02 | Government Medical College, Vadodra                                                                                            | Gujarat Biotechnology Research Centre                                             | R N Daveshtwar, Ramesh Pandit, Tejas Shah, Ankit Himsu, Pritesh Sabara, Apurvash Puvur, Janvi Ravat, Zama Patel, Monika Gandhi, Pinal Trivedi, Mahesh Pandya, Amit Kanani, Nidhi Patel, Nalin Savaliya, Raghwendra Kumar, Dinesh Kumar, Zuber Sayed, Komal Patel, Labhi Pandya, Snehil Bagatharia, Feni Patel, Bhavesh Modi, Gaurishankar Shirmali, R D Dixit, A M Kadi, Umang Mishra, Chaitanya Joshi, Madhvi Joshi                                                 |
| EPI_ISL_455019 | hCoV-19/India/GBRC122/2020            | Asia / India / Gujarat / Vadodra   | 2020-05-02 | Government Medical College, Vadodra                                                                                            | Gujarat Biotechnology Research Centre                                             | Ramesh Pandit, Tejas Shah, Ankit Himsu, Pritesh Sabara, Apurvash Puvur, Janvi Ravat, Zama Patel, Monika Gandhi, Pinal Trivedi, Mahesh Pandya, Amit Kanani, Nidhi Patel, Nalin Savaliya, Raghwendra Kumar, Dinesh Kumar, Zuber Sayed, Komal Patel, Labhi Pandya, Snehil Bagatharia, Feni Patel, Bhavesh Modi, Gaurishankar Shirmali, R D Dixit, A M Kadi, Umang Mishra, Chaitanya Joshi, Madhvi Joshi                                                                 |
| EPI_ISL_455020 | hCoV-19/India/GBRC123/2020            | Asia / India / Gujarat / Vadodra   | 2020-05-02 | Government Medical College, Vadodra                                                                                            | Gujarat Biotechnology Research Centre                                             | Tejas Shah, Ankit Himsu, Pritesh Sabara, Apurvash Puvur, Janvi Ravat, Zama Patel, Monika Gandhi, Pinal Trivedi, Mahesh Pandya, Amit Kanani, Nidhi Patel, Nalin Savaliya, Raghwendra Kumar, Dinesh Kumar, Zuber Sayed, Komal Patel, Labhi Pandya, Snehil Bagatharia, Feni Patel, Bhavesh Modi, Gaurishankar Shirmali, R D Dixit, A M Kadi, Umang Mishra, Chaitanya Joshi, Madhvi Joshi                                                                                |
| EPI_ISL_455021 | hCoV-19/India/GBRC124/2020            | Asia / India / Gujarat / Vadodra   | 2020-05-02 | Government Medical College, Vadodra                                                                                            | Gujarat Biotechnology Research Centre                                             | Bhavya Jindal, Bhavesh Modi, Gaurishankar Shirmali, R D Dixit, A M Kadi, Umang Mishra, Chaitanya Joshi, Madhvi Joshi                                                                                                                                                                                                                                                                                                                                                 |
| EPI_ISL_455022 | hCoV-19/India/GBRC125/2020            | Asia / India / Gujarat / Vadodra   | 2020-05-02 | Government Medical College, Vadodra                                                                                            | Gujarat Biotechnology Research Centre                                             | Ankit Himsu, Pritesh Sabara, Apurvash Puvur, Janvi Ravat, Zama Patel, Monika Gandhi, Pinal Trivedi, Mahesh Pandya, Amit Kanani, Nidhi Patel, Nalin Savaliya, Raghwendra Kumar, Dinesh Kumar, Zuber Sayed, Komal Patel, Labhi Pandya, Snehil Bagatharia, Feni Patel, Bhavesh Modi, Gaurishankar Shirmali, R D Dixit, A M Kadi, Umang Mishra, Chaitanya Joshi, Madhvi Joshi                                                                                            |
| EPI_ISL_455023 | hCoV-19/India/GBRC126/2020            | Asia / India / Gujarat / Vadodra   | 2020-05-02 | Government Medical College, Vadodra                                                                                            | Gujarat Biotechnology Research Centre                                             | Prakash Modi, Sejul Antala, Manish Pattani, Ramesh Pandit, Tejas Shah, Ankit Himsu, Pritesh Sabara, Apurvash Puvur, Janvi Ravat, Zama Patel, Monika Gandhi, Pinal Trivedi, Mahesh Pandya, Amit Kanani, Nidhi Patel, Nalin Savaliya, Raghwendra Kumar, Dinesh Kumar, Zuber Sayed, Komal Patel, Labhi Pandya, Snehil Bagatharia, Feni Patel, Bhavesh Modi, Gaurishankar Shirmali, R D Dixit, A M Kadi, Umang Mishra, Chaitanya Joshi, Madhvi Joshi                     |
| EPI_ISL_455024 | hCoV-19/India/GBRC127/2020            | Asia / India / Gujarat / Vadodra   | 2020-05-02 | Government Medical College, Vadodra                                                                                            | Gujarat Biotechnology Research Centre                                             | Prakash Modi, Sejul Antala, Manish Pattani, Ramesh Pandit, Tejas Shah, Ankit Himsu, Pritesh Sabara, Apurvash Puvur, Janvi Ravat, Zama Patel, Monika Gandhi, Pinal Trivedi, Mahesh Pandya, Amit Kanani, Nidhi Patel, Nalin Savaliya, Raghwendra Kumar, Dinesh Kumar, Zuber Sayed, Komal Patel, Labhi Pandya, Snehil Bagatharia, Feni Patel, Bhavesh Modi, Gaurishankar Shirmali, R D Dixit, A M Kadi, Umang Mishra, Chaitanya Joshi, Madhvi Joshi                     |
| EPI_ISL_455025 | hCoV-19/India/GBRC128/2020            | Asia / India / Gujarat / Vadodra   | 2020-05-02 | Government Medical College, Vadodra                                                                                            | Gujarat Biotechnology Research Centre                                             | Prakash Modi, Sejul Antala, Manish Pattani, Ramesh Pandit, Tejas Shah, Ankit Himsu, Pritesh Sabara, Apurvash Puvur, Janvi Ravat, Zama Patel, Monika Gandhi, Pinal Trivedi, Mahesh Pandya, Amit Kanani, Nidhi Patel, Nalin Savaliya, Raghwendra Kumar, Dinesh Kumar, Zuber Sayed, Komal Patel, Labhi Pandya, Snehil Bagatharia, Feni Patel, Bhavesh Modi, Gaurishankar Shirmali, R D Dixit, A M Kadi, Umang Mishra, Chaitanya Joshi, Madhvi Joshi                     |
| EPI_ISL_455026 | hCoV-19/India/GBRC129/2020            | Asia / India / Gujarat / Vadodra   | 2020-05-02 | Government Medical College, Vadodra                                                                                            | Gujarat Biotechnology Research Centre                                             | Prakash Modi, Sejul Antala, Manish Pattani, Ramesh Pandit, Tejas Shah, Ankit Himsu, Pritesh Sabara, Apurvash Puvur, Janvi Ravat, Zama Patel, Monika Gandhi, Pinal Trivedi, Mahesh Pandya, Amit Kanani, Nidhi Patel, Nalin Savaliya, Raghwendra Kumar, Dinesh Kumar, Zuber Sayed, Komal Patel, Labhi Pandya, Snehil Bagatharia, Feni Patel, Bhavesh Modi, Gaurishankar Shirmali, R D Dixit, A M Kadi, Umang Mishra, Chaitanya Joshi, Madhvi Joshi                     |
| EPI_ISL_455027 | hCoV-19/India/GBRC130/2020            | Asia / India / Gujarat / Vadodra   | 2020-05-02 | Government Medical College, Vadodra                                                                                            | Gujarat Biotechnology Research Centre                                             | Prakash Modi, Sejul Antala, Manish Pattani, Ramesh Pandit, Tejas Shah, Ankit Himsu, Pritesh Sabara, Apurvash Puvur, Janvi Ravat, Zama Patel, Monika Gandhi, Pinal Trivedi, Mahesh Pandya, Amit Kanani, Nidhi Patel, Nalin Savaliya, Raghwendra Kumar, Dinesh Kumar, Zuber Sayed, Komal Patel, Labhi Pandya, Snehil Bagatharia, Feni Patel, Bhavesh Modi, Gaurishankar Shirmali, R D Dixit, A M Kadi, Umang Mishra, Chaitanya Joshi, Madhvi Joshi                     |
| EPI_ISL_455094 | hCoV-19/Vietnam/VNHN_1098/2020        | Asia / Vietnam / Hanoi             | 2020-03-18 | National Hospital of Tropical Diseases                                                                                         | Oxford University Clinical Research Unit, Hanoi, Vietnam                          | Nguyen Thi Tam, Van Dinh Trang, Nguyen Thi Trang, Nguyen Thi Ngoc Diep, Le Nguyen Minh Hoa, Phan Ngoc Thach, H. Rogier van Doorn, on behalf of the OUCRU COVID-19 research group                                                                                                                                                                                                                                                                                     |
| EPI_ISL_455095 | hCoV-19/Vietnam/VNHN_1099/2020        | Asia / Vietnam / Hanoi             | 2020-03-18 | National Hospital of Tropical Diseases                                                                                         | Oxford University Clinical Research Unit, Hanoi, Vietnam                          | Nguyen Thi Tam, Van Dinh Trang, Nguyen Thi Trang, Nguyen Thi Ngoc Diep, Le Nguyen Minh Hoa, Phan Ngoc Thach, H. Rogier van Doorn, on behalf of the OUCRU COVID-19 research group                                                                                                                                                                                                                                                                                     |
| EPI_ISL_455096 | hCoV-19/Vietnam/VNHN_1167/2020        | Asia / Vietnam / Hanoi             | 2020-03-18 | National Hospital of Tropical Diseases                                                                                         | Oxford University Clinical Research Unit, Hanoi, Vietnam                          | Nguyen Thi Tam, Van Dinh Trang, Nguyen Thi Trang, Nguyen Thi Ngoc Diep, Le Nguyen Minh Hoa, Phan Ngoc Thach, H. Rogier van Doorn, on behalf of the OUCRU COVID-19 research group                                                                                                                                                                                                                                                                                     |
| EPI_ISL_455097 | hCoV-19/Vietnam/VNHN_1528/2020        | Asia / Vietnam / Hanoi             | 2020-03-22 | National Hospital of Tropical Diseases                                                                                         | Oxford University Clinical Research Unit, Hanoi, Vietnam                          | Nguyen Thi Tam, Van Dinh Trang, Nguyen Thi Trang, Nguyen Thi Ngoc Diep, Le Nguyen Minh Hoa, Phan Ngoc Thach, H. Rogier van Doorn, on behalf of the OUCRU COVID-19 research group                                                                                                                                                                                                                                                                                     |
| EPI_ISL_455098 | hCoV-19/Vietnam/VNHN_1229/2020        | Asia / Vietnam / Hanoi             | 2020-03-19 | National Hospital of Tropical Diseases                                                                                         | Oxford University Clinical Research Unit, Hanoi, Vietnam                          | Nguyen Thi Tam, Van Dinh Trang, Nguyen Thi Trang, Nguyen Thi Ngoc Diep, Le Nguyen Minh Hoa, Phan Ngoc Thach, H. Rogier van Doorn, on behalf of the OUCRU COVID-19 research group                                                                                                                                                                                                                                                                                     |
| EPI_ISL_455099 | hCoV-19/Vietnam/VNHN_1492/2020        | Asia / Vietnam / Hanoi             | 2020-03-21 | National Hospital of Tropical Diseases                                                                                         | Oxford University Clinical Research Unit, Hanoi, Vietnam                          | Nguyen Thi Tam, Van Dinh Trang, Nguyen Thi Trang, Nguyen Thi Ngoc Diep, Le Nguyen Minh Hoa, Phan Ngoc Thach, H. Rogier van Doorn, on behalf of the OUCRU COVID-19 research group                                                                                                                                                                                                                                                                                     |
| EPI_ISL_455790 | hCoV-19/Malaysia/IMR_WC119/2020       | Asia / Malaysia / Selangor         | 2020-01-30 | Institute for Medical Research, Infectious Disease Research Centre, National Institutes of Health, Ministry of Health Malaysia | Malaysia Genome Institute                                                         | Mohd Noor Mat Isa, Imiti Suhayy Sapien, Yusuf Muhammad Noor, Jeyanthi Suppiah, Nuhrzeem Md Iqbal, Enzka Kasim, Zarina Mohd Zawawi, Siti Norani Othman, Mohd Faizal Abu Bakar, Shamirid Sopie, Azrin Ahmad, Ravindran Thyayan, Norazah Ahmad, Tahir Aris, Shahul Hisham Zainal Ariffin                                                                                                                                                                                |
| EPI_ISL_455791 | hCoV-19/Malaysia/IMR_WC143/2020       | Asia / Malaysia / Selangor         | 2020-02-08 | Institute for Medical Research, Infectious Disease Research Centre, National Institutes of Health, Ministry of Health Malaysia | Malaysia Genome Institute                                                         | Mohd Noor Mat Isa, Imiti Suhayy Sapien, Yusuf Muhammad Noor, Jeyanthi Suppiah, Nuhrzeem Md Iqbal, Enzka Kasim, Zarina Mohd Zawawi, Siti Norani Othman, Mohd Faizal Abu Bakar, Shamirid Sopie, Azrin Ahmad, Ravindran Thyayan, Norazah Ahmad, Tahir Aris, Shahul Hisham Zainal Ariffin                                                                                                                                                                                |
| EPI_ISL_455792 | hCoV-19/Malaysia/IMR_WC458/2020       | Asia / Malaysia / Selangor         | 2020-02-09 | Institute for Medical Research, Infectious Disease Research Centre, National Institutes of Health, Ministry of Health Malaysia | Malaysia Genome Institute                                                         | Mohd Noor Mat Isa, Imiti Suhayy Sapien, Yusuf Muhammad Noor, Jeyanthi Suppiah, Nuhrzeem Md Iqbal, Enzka Kasim, Zarina Mohd Zawawi, Siti Norani Othman, Mohd Faizal Abu Bakar, Shamirid Sopie, Azrin Ahmad, Ravindran Thyayan, Norazah Ahmad, Tahir Aris, Shahul Hisham Zainal Ariffin                                                                                                                                                                                |
| EPI_ISL_455793 | hCoV-19/Malaysia/IMR_WC1114/2020      | Asia / Malaysia / Selangor         | 2020-02-29 | Institute for Medical Research, Infectious Disease Research Centre, National Institutes of Health, Ministry of Health Malaysia | Malaysia Genome Institute                                                         | Mohd Noor Mat Isa, Imiti Suhayy Sapien, Yusuf Muhammad Noor, Jeyanthi Suppiah, Nuhrzeem Md Iqbal, Enzka Kasim, Zarina Mohd Zawawi, Siti Norani Othman, Mohd Faizal Abu Bakar, Shamirid Sopie, Azrin Ahmad, Ravindran Thyayan, Norazah Ahmad, Tahir Aris, Shahul Hisham Zainal Ariffin                                                                                                                                                                                |
| EPI_ISL_457726 | hCoV-19/Taiwan/TSGH-35/2020           | Asia / Taiwan / Taipei             | 2020-02-06 | TSGH-CP molecular lab                                                                                                          | TSGH-CP molecular lab                                                             | Cheng-Lih Peng, Ming-Ji JIAN, Chih-Kai Chang, Jung-Chung Lin, Kuo-Ming Yeh, Chien-Wen Chen, Sheng-Kang Chu, Hang-Yi Chung, Shih-Hung Tsai, Kuo-Sheng Hung, Tien-Yao Chang, Feng-Yee Chang, Hung-Sheng Shang                                                                                                                                                                                                                                                          |
| EPI_ISL_457730 | hCoV-19/Taiwan/TSGH-36/2020           | Asia / Taiwan / Taipei             | 2020-02-06 | TSGH-CP molecular lab                                                                                                          | TSGH-CP molecular lab                                                             | Cheng-Lih Peng, Ming-Ji JIAN, Chih-Kai Chang, Jung-Chung Lin, Kuo-Ming Yeh, Chien-Wen Chen, Sheng-Kang Chu, Hang-Yi Chung, Shih-Hung Tsai, Kuo-Sheng Hung, Tien-Yao Chang, Feng-Yee Chang, Hung-Sheng Shang                                                                                                                                                                                                                                                          |
| EPI_ISL_457750 | hCoV-19/Germany/COV7020/2020-03-26    | Europe / Germany / Rostock         | 2020-03-26 | Centogene AG                                                                                                                   | Centogene AG                                                                      | Prof. Dr. Peter Bauer, Dr. Krishna Kumar Kandaswamy                                                                                                                                                                                                                                                                                                                                                                                                                  |
| EPI_ISL_458100 | hCoV-19/India/GBRC141a/2020           | Asia / India / Gujarat / Ahmedabad | 2020-05-24 | B.J. Medical College and Civil hospital                                                                                        | Gujarat Biotechnology Research Centre                                             | Snehil Bagatharia, Dhaval Vaghela, Ramesh Pandit, Pranay Shah, Kamlesh J Upadhyay, Ramesh Pandit, Tejas Shah, Ankit Himsu, Pritesh Sabara, Apurvash Puvur, Janvi Ravat, Zama Patel, Monika Gandhi, Pinal Trivedi, Mahesh Pandya, Amit Kanani, Nidhi Patel, Nalin Savaliya, Raghwendra Kumar, Dinesh Kumar, Zuber Sayed, Komal Patel, Labhi Pandya, Atul Anwar, Bhavesh Modi, Gaurishankar Shirmali, R D Dixit, A M Kadi, Umang Mishra, Chaitanya Joshi, Madhvi Joshi |
| EPI_ISL_458101 | hCoV-19/India/GBRC141b/2020           | Asia / India / Gujarat / Ahmedabad | 2020-05-24 | B.J. Medical College and Civil hospital                                                                                        | Gujarat Biotechnology Research Centre                                             | Snehil Bagatharia, Dhaval Vaghela, Ramesh Pandit, Pranay Shah, Kamlesh J Upadhyay, Ramesh Pandit, Tejas Shah, Ankit Himsu, Pritesh Sabara, Apurvash Puvur, Janvi Ravat, Zama Patel, Monika Gandhi, Pinal Trivedi, Mahesh Pandya, Amit Kanani, Nidhi Patel, Nalin Savaliya, Raghwendra Kumar, Dinesh Kumar, Zuber Sayed, Komal Patel, Labhi Pandya, Atul Anwar, Bhavesh Modi, Gaurishankar Shirmali, R D Dixit, A M Kadi, Umang Mishra, Chaitanya Joshi, Madhvi Joshi |
| EPI_ISL_458102 | hCoV-19/India/GBRC142/2020            | Asia / India / Gujarat / Ahmedabad | 2020-05-24 | B.J. Medical College and Civil hospital                                                                                        | Gujarat Biotechnology Research Centre                                             | Snehil Bagatharia, Dhaval Vaghela, Ramesh Pandit, Pranay Shah, Kamlesh J Upadhyay, Ramesh Pandit, Tejas Shah, Ankit Himsu, Pritesh Sabara, Apurvash Puvur, Janvi Ravat, Zama Patel, Monika Gandhi, Pinal Trivedi, Mahesh Pandya, Amit Kanani, Nidhi Patel, Nalin Savaliya, Raghwendra Kumar, Dinesh Kumar, Zuber Sayed, Komal Patel, Labhi Pandya, Atul Anwar, Bhavesh Modi, Gaurishankar Shirmali, R D Dixit, A M Kadi, Umang Mishra, Chaitanya Joshi, Madhvi Joshi |
| EPI_ISL_458103 | hCoV-19/India/GBRC143/2020            | Asia / India / Gujarat / Bayad     | 2020-05-05 | Gujarat Biotechnology Research Centre                                                                                          | Gujarat Biotechnology Research Centre                                             | Ramesh Pandit, Tejas Shah, Ankit Himsu, Pritesh Sabara, Apurvash Puvur, Janvi Ravat, Zama Patel, Monika Gandhi, Pinal Trivedi, Mahesh Pandya, Amit Kanani, Nidhi Patel, Nalin Savaliya, Raghwendra Kumar, Dinesh Kumar, Zuber Sayed, Komal Patel, Labhi Pandya, Atul Anwar, Bhavesh Modi, Gaurishankar Shirmali, R D Dixit, A M Kadi, Umang Mishra, Chaitanya Joshi, Madhvi Joshi                                                                                    |
| EPI_ISL_458104 | hCoV-19/India/GBRC144/2020            | Asia / India / Gujarat / Prantij   | 2020-05-06 | Gujarat Biotechnology Research Centre                                                                                          | Gujarat Biotechnology Research Centre                                             | Ramesh Pandit, Tejas Shah, Ankit Himsu, Pritesh Sabara, Apurvash Puvur, Janvi Ravat, Zama Patel, Monika Gandhi, Pinal Trivedi, Mahesh Pandya, Amit Kanani, Nidhi Patel, Nalin Savaliya, Raghwendra Kumar, Dinesh Kumar, Zuber Sayed, Komal Patel, Labhi Pandya, Atul Anwar, Bhavesh Modi, Gaurishankar Shirmali, R D Dixit, A M Kadi, Umang Mishra, Chaitanya Joshi, Madhvi Joshi                                                                                    |
| EPI_ISL_458105 | hCoV-19/India/GBRC145/2020            | Asia / India / Gujarat / Prantij   | 2020-05-06 | Gujarat Biotechnology Research Centre                                                                                          | Gujarat Biotechnology Research Centre                                             | Ramesh Pandit, Tejas Shah, Ankit Himsu, Pritesh Sabara, Apurvash Puvur, Janvi Ravat, Zama Patel, Monika Gandhi, Pinal Trivedi, Mahesh Pandya, Amit Kanani, Nidhi Patel, Nalin Savaliya, Raghwendra Kumar, Dinesh Kumar, Zuber Sayed, Komal Patel, Labhi Pandya, Atul Anwar, Bhavesh Modi, Gaurishankar Shirmali, R D Dixit, A M Kadi, Umang Mishra, Chaitanya Joshi, Madhvi Joshi                                                                                    |

[illegible]

Page PAGE





|                |                                |                                           |            |                                                                                                                                                                                                                                                                           |                                                                                                                                                  |                                                                                                                                                                                                                                                                                                                                                                                                                                                                                                                                                                                                                                                                                                                                                                                                                                                                                                                                                                                                                                                                                                                                                                                                                                                                                                          |
|----------------|--------------------------------|-------------------------------------------|------------|---------------------------------------------------------------------------------------------------------------------------------------------------------------------------------------------------------------------------------------------------------------------------|--------------------------------------------------------------------------------------------------------------------------------------------------|----------------------------------------------------------------------------------------------------------------------------------------------------------------------------------------------------------------------------------------------------------------------------------------------------------------------------------------------------------------------------------------------------------------------------------------------------------------------------------------------------------------------------------------------------------------------------------------------------------------------------------------------------------------------------------------------------------------------------------------------------------------------------------------------------------------------------------------------------------------------------------------------------------------------------------------------------------------------------------------------------------------------------------------------------------------------------------------------------------------------------------------------------------------------------------------------------------------------------------------------------------------------------------------------------------|
| EPI_ISI_467052 | hCoV-19/India/GERC1829/2020    | Asia / India / Gujarat / Ahmedabad        | 2020-06-03 | B.J. Medical College and Civil hospital                                                                                                                                                                                                                                   | Gujarat Biotechnology Research Centre                                                                                                            | Pransy Shah, Kamlesh J Upadhyay, Nirav Munglappara, Tejas Shah, Ankil Hissu, Pritesh Sabara, Aguravsinh Pudar, Jamil Rawal, Zarina Patel, Monika Gandhi, Pooja Thivedi, Mahanshi Pandya, Nidhi Patel, Nalin Savaliya, Raghavendra Kumar, Dinesh Kumar, Zuber Sayed, Komal Patel, Labhji Pandya, Snehal Bagatharia, Priyanka P Vatsa, R D Dhat, A M Kadi, Harsh Babak, Chaitanya Joshi, Madhav Joshi, Kamlesh J Upadhyay, Nirav Munglappara, Tejas Shah, Ankil Hissu, Pritesh Sabara, Aguravsinh Pudar, Jamil Rawal, Zarina Patel, Monika Gandhi, Pooja Thivedi, Mahanshi Pandya, Nidhi Patel, Nalin Savaliya, Raghavendra Kumar, Dinesh Kumar, Zuber Sayed, Komal Patel, Labhji Pandya, Snehal Bagatharia, Pransy Shah, Pooja P Doshi, R D Dhat, A M Kadi, Harsh Babak, Chaitanya Joshi, Madhav Joshi, Nirav Munglappara, Tejas Shah, Ankil Hissu, Pritesh Sabara, Aguravsinh Pudar, Jamil Rawal, Zarina Patel, Monika Gandhi, Pooja Thivedi, Mahanshi Pandya, Nidhi Patel, Nalin Savaliya, Raghavendra Kumar, Dinesh Kumar, Zuber Sayed, Komal Patel, Labhji Pandya, Snehal Bagatharia, Pransy Shah, Kamlesh J Upadhyay, Aguravsinh Pudar, R D Dhat, A M Kadi, Harsh Babak, Chaitanya Joshi, Madhav Joshi, Naranzul Ts, Darmaa B, Bayasgalan N, Ankhbayar S, Tsogtbaatar B, Ederne Ochir Ts, Nyamdava P |
| EPI_ISI_467053 | hCoV-19/India/GERC183a/2020    | Asia / India / Gujarat / Ahmedabad        | 2020-06-03 | B.J. Medical College and Civil hospital                                                                                                                                                                                                                                   | Gujarat Biotechnology Research Centre                                                                                                            |                                                                                                                                                                                                                                                                                                                                                                                                                                                                                                                                                                                                                                                                                                                                                                                                                                                                                                                                                                                                                                                                                                                                                                                                                                                                                                          |
| EPI_ISI_467054 | hCoV-19/India/GERC183b/2020    | Asia / India / Gujarat / Ahmedabad        | 2020-06-03 | B.J. Medical College and Civil hospital                                                                                                                                                                                                                                   | Gujarat Biotechnology Research Centre                                                                                                            |                                                                                                                                                                                                                                                                                                                                                                                                                                                                                                                                                                                                                                                                                                                                                                                                                                                                                                                                                                                                                                                                                                                                                                                                                                                                                                          |
| EPI_ISI_467066 | hCoV-19/Mongolia/Imp3989/2020  | Asia / Mongolia                           | 2020-03-25 | Virology lab, NIC, NCCD, Ulaanbaatar, Mongolia<br>Molecular diagnostic laboratory of Federal Budget Institution of Science "Central Research Institute of Epidemiology" of The Federal Service on Customers Rights Protection and Human Well-being Surveillance           | National Centre for Communicable Diseases (NCCD)<br>Group of Genomics and Postgenomic Technologies of Central Research Institute of Epidemiology | Speranskaya AS, Kapitelova VV, Samoilov AE, Korneenko EV, Sizova TV, Tivanova EV, Shipulina OY, Alimkin VG                                                                                                                                                                                                                                                                                                                                                                                                                                                                                                                                                                                                                                                                                                                                                                                                                                                                                                                                                                                                                                                                                                                                                                                               |
| EPI_ISI_467774 | hCoV-19/Russia/CRIE163844/2020 | Europe / Russia / Moscow                  | 2020-03-31 | Molecular diagnostic laboratory of Federal Budget Institution of Science "Central Research Institute of Epidemiology" of The Federal Service on Customers Rights Protection and Human Well-being Surveillance                                                             | Group of Genomics and Postgenomic Technologies of Central Research Institute of Epidemiology                                                     | Speranskaya AS, Kapitelova VV, Samoilov AE, Korneenko EV, Sizova TV, Tivanova EV, Shipulina OY, Alimkin VG                                                                                                                                                                                                                                                                                                                                                                                                                                                                                                                                                                                                                                                                                                                                                                                                                                                                                                                                                                                                                                                                                                                                                                                               |
| EPI_ISI_467775 | hCoV-19/Russia/CRIE139642/2020 | Europe / Russia / Moscow                  | 2020-03-29 |                                                                                                                                                                                                                                                                           |                                                                                                                                                  | Victor M Coman, Jom Beheim-Schwarzbach, Barbara Muehlenmann, Tallina Veith, Julia Schneider, Terry Jones, L. Usteh, N. Parascich, M. Lazar, Christian Drosian                                                                                                                                                                                                                                                                                                                                                                                                                                                                                                                                                                                                                                                                                                                                                                                                                                                                                                                                                                                                                                                                                                                                            |
| EPI_ISI_467781 | hCoV-19/Romania/CriV67248/2020 | Europe / Romania / Constanta              | 2020-04-28 | National Influenza Centre Romania                                                                                                                                                                                                                                         | Charle Universitätsmedizin Berlin, Institute of Virology<br>Instituto Adolfo Lutz, Interdisciplinary Procedures Center, Strategic Laboratory     | Claudio Tavares Sacchi, Claudia Regina Gonçalves, Erica Valesa Ramos Gomes                                                                                                                                                                                                                                                                                                                                                                                                                                                                                                                                                                                                                                                                                                                                                                                                                                                                                                                                                                                                                                                                                                                                                                                                                               |
| EPI_ISI_468305 | hCoV-19/Brazil/SPBR-138/2020   | South America / Brazil / Sao Paulo / Diad | 2020-04-08 | Centro de Vigilância e Saúde de Diadema                                                                                                                                                                                                                                   | Instituto Adolfo Lutz, Interdisciplinary Procedures Center, Strategic Laboratory                                                                 | Claudio Tavares Sacchi, Claudia Regina Gonçalves, Erica Valesa Ramos Gomes                                                                                                                                                                                                                                                                                                                                                                                                                                                                                                                                                                                                                                                                                                                                                                                                                                                                                                                                                                                                                                                                                                                                                                                                                               |
| EPI_ISI_468306 | hCoV-19/Brazil/SPBR-139/2020   | South America / Brazil / Sao Paulo / Rio  | 2020-03-30 | Laboratório Municipal de Análises Clínicas                                                                                                                                                                                                                                | Instituto Adolfo Lutz, Interdisciplinary Procedures Center, Strategic Laboratory                                                                 | Claudio Tavares Sacchi, Claudia Regina Gonçalves, Erica Valesa Ramos Gomes                                                                                                                                                                                                                                                                                                                                                                                                                                                                                                                                                                                                                                                                                                                                                                                                                                                                                                                                                                                                                                                                                                                                                                                                                               |
| EPI_ISI_468307 | hCoV-19/Brazil/SPBR-140/2020   | South America / Brazil / Sao Paulo / Diad | 2020-04-08 | Centro de Vigilância e Saúde de Diadema                                                                                                                                                                                                                                   | Instituto Adolfo Lutz, Interdisciplinary Procedures Center, Strategic Laboratory                                                                 | Claudio Tavares Sacchi, Claudia Regina Gonçalves, Erica Valesa Ramos Gomes                                                                                                                                                                                                                                                                                                                                                                                                                                                                                                                                                                                                                                                                                                                                                                                                                                                                                                                                                                                                                                                                                                                                                                                                                               |
| EPI_ISI_468308 | hCoV-19/Brazil/SPBR-141/2020   | South America / Brazil / Sao Paulo / Sao  | 2020-03-23 | Hospital Municipal do Tatapéu Caminho Caricchio                                                                                                                                                                                                                           | Instituto Adolfo Lutz, Interdisciplinary Procedures Center, Strategic Laboratory                                                                 | Claudio Tavares Sacchi, Claudia Regina Gonçalves, Erica Valesa Ramos Gomes                                                                                                                                                                                                                                                                                                                                                                                                                                                                                                                                                                                                                                                                                                                                                                                                                                                                                                                                                                                                                                                                                                                                                                                                                               |
| EPI_ISI_468310 | hCoV-19/Brazil/SPBR-144/2020   | South America / Brazil / Sao Paulo / Sao  | 2020-03-22 | Hospital Sao Paulo de Ensino da UNIFESP                                                                                                                                                                                                                                   | Instituto Adolfo Lutz, Interdisciplinary Procedures Center, Strategic Laboratory                                                                 | Claudio Tavares Sacchi, Claudia Regina Gonçalves, Erica Valesa Ramos Gomes                                                                                                                                                                                                                                                                                                                                                                                                                                                                                                                                                                                                                                                                                                                                                                                                                                                                                                                                                                                                                                                                                                                                                                                                                               |
| EPI_ISI_468311 | hCoV-19/Brazil/SPBR-146/2020   | South America / Brazil / Sao Paulo / Sao  | 2020-03-26 | Hospital Municipal Dr Ignacio Proenca de Gouveia                                                                                                                                                                                                                          | Instituto Adolfo Lutz, Interdisciplinary Procedures Center, Strategic Laboratory                                                                 | Claudio Tavares Sacchi, Claudia Regina Gonçalves, Erica Valesa Ramos Gomes                                                                                                                                                                                                                                                                                                                                                                                                                                                                                                                                                                                                                                                                                                                                                                                                                                                                                                                                                                                                                                                                                                                                                                                                                               |
| EPI_ISI_468312 | hCoV-19/Brazil/SPBR-147/2020   | South America / Brazil / Sao Paulo / Sao  | 2020-03-26 | Hospital Municipal Dr Ignacio Proenca de Gouveia                                                                                                                                                                                                                          | Instituto Adolfo Lutz, Interdisciplinary Procedures Center, Strategic Laboratory                                                                 | Claudio Tavares Sacchi, Claudia Regina Gonçalves, Erica Valesa Ramos Gomes                                                                                                                                                                                                                                                                                                                                                                                                                                                                                                                                                                                                                                                                                                                                                                                                                                                                                                                                                                                                                                                                                                                                                                                                                               |
| EPI_ISI_468313 | hCoV-19/Brazil/SPBR-148/2020   | South America / Brazil / Sao Paulo / Sao  | 2020-03-23 | Vigilância Epidemiológica de São Bernardo do Campo                                                                                                                                                                                                                        | Instituto Adolfo Lutz, Interdisciplinary Procedures Center, Strategic Laboratory                                                                 | Claudio Tavares Sacchi, Claudia Regina Gonçalves, Erica Valesa Ramos Gomes                                                                                                                                                                                                                                                                                                                                                                                                                                                                                                                                                                                                                                                                                                                                                                                                                                                                                                                                                                                                                                                                                                                                                                                                                               |
| EPI_ISI_468314 | hCoV-19/Brazil/SPBR-149/2020   | South America / Brazil / Sao Paulo / Cae  | 2020-03-26 | CTA Centro de Testagem e Aconselhamento                                                                                                                                                                                                                                   | Instituto Adolfo Lutz, Interdisciplinary Procedures Center, Strategic Laboratory                                                                 | Claudio Tavares Sacchi, Claudia Regina Gonçalves, Erica Valesa Ramos Gomes                                                                                                                                                                                                                                                                                                                                                                                                                                                                                                                                                                                                                                                                                                                                                                                                                                                                                                                                                                                                                                                                                                                                                                                                                               |
| EPI_ISI_468315 | hCoV-19/Brazil/SPBR-500/2020   | South America / Brazil / Sao Paulo / Sao  | 2020-04-12 | Hospital Municipal do Tatapéu Caminho Caricchio                                                                                                                                                                                                                           | Instituto Adolfo Lutz, Interdisciplinary Procedures Center, Strategic Laboratory                                                                 | Claudio Tavares Sacchi, Claudia Regina Gonçalves, Erica Valesa Ramos Gomes                                                                                                                                                                                                                                                                                                                                                                                                                                                                                                                                                                                                                                                                                                                                                                                                                                                                                                                                                                                                                                                                                                                                                                                                                               |
| EPI_ISI_468316 | hCoV-19/Brazil/SPBR-504/2020   | South America / Brazil / Sao Paulo / Mau  | 2020-04-14 | UPA Vila Assis                                                                                                                                                                                                                                                            | Instituto Adolfo Lutz, Interdisciplinary Procedures Center, Strategic Laboratory                                                                 | Claudio Tavares Sacchi, Claudia Regina Gonçalves, Erica Valesa Ramos Gomes                                                                                                                                                                                                                                                                                                                                                                                                                                                                                                                                                                                                                                                                                                                                                                                                                                                                                                                                                                                                                                                                                                                                                                                                                               |
| EPI_ISI_468318 | hCoV-19/Brazil/SPBR-505/2020   | South America / Brazil / Sao Paulo / Sao  | 2020-04-15 | Hospital Universitario da USP                                                                                                                                                                                                                                             | Instituto Adolfo Lutz, Interdisciplinary Procedures Center, Strategic Laboratory                                                                 | Claudio Tavares Sacchi, Claudia Regina Gonçalves, Erica Valesa Ramos Gomes                                                                                                                                                                                                                                                                                                                                                                                                                                                                                                                                                                                                                                                                                                                                                                                                                                                                                                                                                                                                                                                                                                                                                                                                                               |
| EPI_ISI_468319 | hCoV-19/Brazil/SPBR-506/2020   | South America / Brazil / Sao Paulo / Sao  | 2020-04-14 | Vigilância Epidemiológica de São Bernardo do Campo                                                                                                                                                                                                                        | Instituto Adolfo Lutz, Interdisciplinary Procedures Center, Strategic Laboratory                                                                 | Claudio Tavares Sacchi, Claudia Regina Gonçalves, Erica Valesa Ramos Gomes                                                                                                                                                                                                                                                                                                                                                                                                                                                                                                                                                                                                                                                                                                                                                                                                                                                                                                                                                                                                                                                                                                                                                                                                                               |
| EPI_ISI_468320 | hCoV-19/Brazil/SPBR-508/2020   | South America / Brazil / Sao Paulo / Hor  | 2020-04-13 | Secretaria Municipal de Saúde de Hortolândia                                                                                                                                                                                                                              | Instituto Adolfo Lutz, Interdisciplinary Procedures Center, Strategic Laboratory                                                                 | Claudio Tavares Sacchi, Claudia Regina Gonçalves, Erica Valesa Ramos Gomes                                                                                                                                                                                                                                                                                                                                                                                                                                                                                                                                                                                                                                                                                                                                                                                                                                                                                                                                                                                                                                                                                                                                                                                                                               |
| EPI_ISI_468321 | hCoV-19/Brazil/SPBR-516/2020   | South America / Brazil / Sao Paulo / Sao  | 2020-04-22 | Hospital Universitario da USP                                                                                                                                                                                                                                             | Instituto Adolfo Lutz, Interdisciplinary Procedures Center, Strategic Laboratory                                                                 | Claudio Tavares Sacchi, Claudia Regina Gonçalves, Erica Valesa Ramos Gomes                                                                                                                                                                                                                                                                                                                                                                                                                                                                                                                                                                                                                                                                                                                                                                                                                                                                                                                                                                                                                                                                                                                                                                                                                               |
| EPI_ISI_468914 | hCoV-19/Italy/I2SPB_703/2020   | Europe / Italy / Apulia                   | 2020-03-18 | Istituto Zooprofilattico Sperimentale Puglia e Basilicata;<br>Dipartimento di Bioscienze, Biotecnologie e Biotecnologia dell'Università degli Studi di Bari "A.Moro"; Istituto di Biotecnologia e Biotecnologie Molecolari del Consiglio Nazionale delle Ricerche di Bari | Beacarbon (Bioinformatics, Evolution and Comparative Genomics lab), Dept of Biosciences, University on Milan                                     | Paola A, Pessio G, Manzoni C, Chiara M, Alexandra Gerber, Ana Paula Guimarães, Luiz Gonzaga Paula de Almeida, Ronaldo da Silva Francisco Junior, Mariane Talon, Filipe Romero, Alia Duque Rossi, Terezinha Maria Pereira, working group UFRRJ, Jacqueline Goes de Jesus, Ingra Morales Claro, Ester Cederia Sabino, Nuno Rodrigues Faria, CADDE-group, Laboratório Hermes Pardini, Laboratório Simile, working group UFMG, Amílcar Tanuri, Carolina Voloch, Renato Santana Aguiar e Ana Tereza Vasconcelos                                                                                                                                                                                                                                                                                                                                                                                                                                                                                                                                                                                                                                                                                                                                                                                               |
| EPI_ISI_470610 | hCoV-19/Brazil/PA0236/2020     | South America / Brazil / Para             | 2020-04-03 | Hermes Pardini                                                                                                                                                                                                                                                            | Bioinformatics Laboratory / LUNCC                                                                                                                | Alexandra Gerber, Ana Paula Guimarães, Luiz Gonzaga Paula de Almeida, Ronaldo da Silva Francisco Junior, Mariane Talon, Filipe Romero, Alia Duque Rossi, Terezinha Maria Pereira, working group UFRRJ, Jacqueline Goes de Jesus, Ingra Morales Claro, Ester Cederia Sabino, Nuno Rodrigues Faria, CADDE-group, Laboratório Hermes Pardini, Laboratório Simile, working group UFMG, Amílcar Tanuri, Carolina Voloch, Renato Santana Aguiar e Ana Tereza Vasconcelos                                                                                                                                                                                                                                                                                                                                                                                                                                                                                                                                                                                                                                                                                                                                                                                                                                       |
| EPI_ISI_470611 | hCoV-19/Brazil/PA0237/2020     | South America / Brazil / Para             | 2020-04-03 | Hermes Pardini                                                                                                                                                                                                                                                            | Bioinformatics Laboratory / LUNCC                                                                                                                | Alexandra Gerber, Ana Paula Guimarães, Luiz Gonzaga Paula de Almeida, Ronaldo da Silva Francisco Junior, Mariane Talon, Filipe Romero, Alia Duque Rossi, Terezinha Maria Pereira, working group UFRRJ, Jacqueline Goes de Jesus, Ingra Morales Claro, Ester Cederia Sabino, Nuno Rodrigues Faria, CADDE-group, Laboratório Hermes Pardini, Laboratório Simile, working group UFMG, Amílcar Tanuri, Carolina Voloch, Renato Santana Aguiar e Ana Tereza Vasconcelos                                                                                                                                                                                                                                                                                                                                                                                                                                                                                                                                                                                                                                                                                                                                                                                                                                       |
| EPI_ISI_470612 | hCoV-19/Brazil/PE0236/2020     | South America / Brazil / Pernambuco       | 2020-04-03 | Hermes Pardini                                                                                                                                                                                                                                                            | Bioinformatics Laboratory / LUNCC                                                                                                                | Alexandra Gerber, Ana Paula Guimarães, Luiz Gonzaga Paula de Almeida, Ronaldo da Silva Francisco Junior, Mariane Talon, Filipe Romero, Alia Duque Rossi, Terezinha Maria Pereira, working group UFRRJ, Jacqueline Goes de Jesus, Ingra Morales Claro, Ester Cederia Sabino, Nuno Rodrigues Faria, CADDE-group, Laboratório Hermes Pardini, Laboratório Simile, working group UFMG, Amílcar Tanuri, Carolina Voloch, Renato Santana Aguiar e Ana Tereza Vasconcelos                                                                                                                                                                                                                                                                                                                                                                                                                                                                                                                                                                                                                                                                                                                                                                                                                                       |
| EPI_ISI_470613 | hCoV-19/Brazil/PI0239/2020     | South America / Brazil / Piaui            | 2020-03-19 | Hermes Pardini                                                                                                                                                                                                                                                            | Bioinformatics Laboratory / LUNCC                                                                                                                | Alexandra Gerber, Ana Paula Guimarães, Luiz Gonzaga Paula de Almeida, Ronaldo da Silva Francisco Junior, Mariane Talon, Filipe Romero, Alia Duque Rossi, Terezinha Maria Pereira, working group UFRRJ, Jacqueline Goes de Jesus, Ingra Morales Claro, Ester Cederia Sabino, Nuno Rodrigues Faria, CADDE-group, Laboratório Hermes Pardini, Laboratório Simile, working group UFMG, Amílcar Tanuri, Carolina Voloch, Renato Santana Aguiar e Ana Tereza Vasconcelos                                                                                                                                                                                                                                                                                                                                                                                                                                                                                                                                                                                                                                                                                                                                                                                                                                       |
| EPI_ISI_470614 | hCoV-19/Brazil/PR0241/2020     | South America / Brazil / Paraná           | 2020-04-02 | Hermes Pardini                                                                                                                                                                                                                                                            | Bioinformatics Laboratory / LUNCC                                                                                                                | Alexandra Gerber, Ana Paula Guimarães, Luiz Gonzaga Paula de Almeida, Ronaldo da Silva Francisco Junior, Mariane Talon, Filipe Romero, Alia Duque Rossi, Terezinha Maria Pereira, working group UFRRJ, Jacqueline Goes de Jesus, Ingra Morales Claro, Ester Cederia Sabino, Nuno Rodrigues Faria, CADDE-group, Laboratório Hermes Pardini, Laboratório Simile, working group UFMG, Amílcar Tanuri, Carolina Voloch, Renato Santana Aguiar e Ana Tereza Vasconcelos                                                                                                                                                                                                                                                                                                                                                                                                                                                                                                                                                                                                                                                                                                                                                                                                                                       |
| EPI_ISI_470615 | hCoV-19/Brazil/RJ0247/2020     | South America / Brazil / Rio de Janeiro   | 2020-03-23 | Laboratório de Virologia Molecular / UFRRJ                                                                                                                                                                                                                                | Bioinformatics Laboratory / LUNCC                                                                                                                | Alexandra Gerber, Ana Paula Guimarães, Luiz Gonzaga Paula de Almeida, Ronaldo da Silva Francisco Junior, Mariane Talon, Filipe Romero, Alia Duque Rossi, Terezinha Maria Pereira, working group UFRRJ, Jacqueline Goes de Jesus, Ingra Morales Claro, Ester Cederia Sabino, Nuno Rodrigues Faria, CADDE-group, Laboratório Hermes Pardini, Laboratório Simile, working group UFMG, Amílcar Tanuri, Carolina Voloch, Renato Santana Aguiar e Ana Tereza Vasconcelos                                                                                                                                                                                                                                                                                                                                                                                                                                                                                                                                                                                                                                                                                                                                                                                                                                       |
| EPI_ISI_470616 | hCoV-19/Brazil/RJ0248/2020     | South America / Brazil / Rio de Janeiro   | 2020-03-24 | Laboratório de Virologia Molecular / UFRRJ                                                                                                                                                                                                                                | Bioinformatics Laboratory / LUNCC                                                                                                                | Alexandra Gerber, Ana Paula Guimarães, Luiz Gonzaga Paula de Almeida, Ronaldo da Silva Francisco Junior, Mariane Talon, Filipe Romero, Alia Duque Rossi, Terezinha Maria Pereira, working group UFRRJ, Jacqueline Goes de Jesus, Ingra Morales Claro, Ester Cederia Sabino, Nuno Rodrigues Faria, CADDE-group, Laboratório Hermes Pardini, Laboratório Simile, working group UFMG, Amílcar Tanuri, Carolina Voloch, Renato Santana Aguiar e Ana Tereza Vasconcelos                                                                                                                                                                                                                                                                                                                                                                                                                                                                                                                                                                                                                                                                                                                                                                                                                                       |
| EPI_ISI_470617 | hCoV-19/Brazil/RJ0249/2020     | South America / Brazil / Rio de Janeiro   | 2020-03-25 | Laboratório de Virologia Molecular / UFRRJ                                                                                                                                                                                                                                | Bioinformatics Laboratory / LUNCC                                                                                                                | Alexandra Gerber, Ana Paula Guimarães, Luiz Gonzaga Paula de Almeida, Ronaldo da Silva Francisco Junior, Mariane Talon, Filipe Romero, Alia Duque Rossi, Terezinha Maria Pereira, working group UFRRJ, Jacqueline Goes de Jesus, Ingra Morales Claro, Ester Cederia Sabino, Nuno Rodrigues Faria, CADDE-group, Laboratório Hermes Pardini, Laboratório Simile, working group UFMG, Amílcar Tanuri, Carolina Voloch, Renato Santana Aguiar e Ana Tereza Vasconcelos                                                                                                                                                                                                                                                                                                                                                                                                                                                                                                                                                                                                                                                                                                                                                                                                                                       |
| EPI_ISI_470618 | hCoV-19/Brazil/RJ0250/2020     | South America / Brazil / Rio de Janeiro   | 2020-03-26 | Laboratório de Virologia Molecular / UFRRJ                                                                                                                                                                                                                                | Bioinformatics Laboratory / LUNCC                                                                                                                | Alexandra Gerber, Ana Paula Guimarães, Luiz Gonzaga Paula de Almeida, Ronaldo da Silva Francisco Junior, Mariane Talon, Filipe Romero, Alia Duque Rossi, Terezinha Maria Pereira, working group UFRRJ, Jacqueline Goes de Jesus, Ingra Morales Claro, Ester Cederia Sabino, Nuno Rodrigues Faria, CADDE-group, Laboratório Hermes Pardini, Laboratório Simile, working group UFMG, Amílcar Tanuri, Carolina Voloch, Renato Santana Aguiar e Ana Tereza Vasconcelos                                                                                                                                                                                                                                                                                                                                                                                                                                                                                                                                                                                                                                                                                                                                                                                                                                       |
| EPI_ISI_470619 | hCoV-19/Brazil/RJ0251/2020     | South America / Brazil / Rio de Janeiro   | 2020-03-27 | Laboratório de Virologia Molecular / UFRRJ                                                                                                                                                                                                                                | Bioinformatics Laboratory / LUNCC                                                                                                                | Alexandra Gerber, Ana Paula Guimarães, Luiz Gonzaga Paula de Almeida, Ronaldo da Silva Francisco Junior, Mariane Talon, Filipe Romero, Alia Duque Rossi, Terezinha Maria Pereira, working group UFRRJ, Jacqueline Goes de Jesus, Ingra Morales Claro, Ester Cederia Sabino, Nuno Rodrigues Faria, CADDE-group, Laboratório Hermes Pardini, Laboratório Simile, working group UFMG, Amílcar Tanuri, Carolina Voloch, Renato Santana Aguiar e Ana Tereza Vasconcelos                                                                                                                                                                                                                                                                                                                                                                                                                                                                                                                                                                                                                                                                                                                                                                                                                                       |
| EPI_ISI_470620 | hCoV-19/Brazil/RJ0252/2020     | South America / Brazil / Rio de Janeiro   | 2020-03-30 | Laboratório de Virologia Molecular / UFRRJ                                                                                                                                                                                                                                | Bioinformatics Laboratory / LUNCC                                                                                                                | Alexandra Gerber, Ana Paula Guimarães, Luiz Gonzaga Paula de Almeida, Ronaldo da Silva Francisco Junior, Mariane Talon, Filipe Romero, Alia Duque Rossi, Terezinha Maria Pereira, working group UFRRJ, Jacqueline Goes de Jesus, Ingra Morales Claro, Ester Cederia Sabino, Nuno Rodrigues Faria, CADDE-group, Laboratório Hermes Pardini, Laboratório Simile, working group UFMG, Amílcar Tanuri, Carolina Voloch, Renato Santana Aguiar e Ana Tereza Vasconcelos                                                                                                                                                                                                                                                                                                                                                                                                                                                                                                                                                                                                                                                                                                                                                                                                                                       |
| EPI_ISI_470621 | hCoV-19/Brazil/RJ0253/2020     | South America / Brazil / Rio de Janeiro   | 2020-03-31 | Laboratório de Virologia Molecular / UFRRJ                                                                                                                                                                                                                                | Bioinformatics Laboratory / LUNCC                                                                                                                | Alexandra Gerber, Ana Paula Guimarães, Luiz Gonzaga Paula de Almeida, Ronaldo da Silva Francisco Junior, Mariane Talon, Filipe Romero, Alia Duque Rossi, Terezinha Maria Pereira, working group UFRRJ, Jacqueline Goes de Jesus, Ingra Morales Claro, Ester Cederia Sabino, Nuno Rodrigues Faria, CADDE-group, Laboratório Hermes Pardini, Laboratório Simile, working group UFMG, Amílcar Tanuri, Carolina Voloch, Renato Santana Aguiar e Ana Tereza Vasconcelos                                                                                                                                                                                                                                                                                                                                                                                                                                                                                                                                                                                                                                                                                                                                                                                                                                       |
| EPI_ISI_470622 | hCoV-19/Brazil/RJ0254/2020     | South America / Brazil / Rio de Janeiro   | 2020-04-01 | Laboratório de Virologia Molecular / UFRRJ                                                                                                                                                                                                                                | Bioinformatics Laboratory / LUNCC                                                                                                                | Alexandra Gerber, Ana Paula Guimarães, Luiz Gonzaga Paula de Almeida, Ronaldo da Silva Francisco Junior, Mariane Talon, Filipe Romero, Alia Duque Rossi, Terezinha Maria Pereira, working group UFRRJ, Jacqueline Goes de Jesus, Ingra Morales Claro, Ester Cederia Sabino, Nuno Rodrigues Faria, CADDE-group, Laboratório Hermes Pardini, Laboratório Simile, working group UFMG, Amílcar Tanuri, Carolina Voloch, Renato Santana Aguiar e Ana Tereza Vasconcelos                                                                                                                                                                                                                                                                                                                                                                                                                                                                                                                                                                                                                                                                                                                                                                                                                                       |
| EPI_ISI_470623 | hCoV-19/Brazil/RJ0255/2020     | South America / Brazil / Rio de Janeiro   | 2020-04-02 | Laboratório de Virologia Molecular / UFRRJ                                                                                                                                                                                                                                | Bioinformatics Laboratory / LUNCC                                                                                                                | Alexandra Gerber, Ana Paula Guimarães, Luiz Gonzaga Paula de Almeida, Ronaldo da Silva Francisco Junior, Mariane Talon, Filipe Romero, Alia Duque Rossi, Terezinha Maria Pereira, working group UFRRJ, Jacqueline Goes de Jesus, Ingra Morales Claro, Ester Cederia Sabino, Nuno Rodrigues Faria, CADDE-group, Laboratório Hermes Pardini, Laboratório Simile, working group UFMG, Amílcar Tanuri, Carolina Voloch, Renato Santana Aguiar e Ana Tereza Vasconcelos                                                                                                                                                                                                                                                                                                                                                                                                                                                                                                                                                                                                                                                                                                                                                                                                                                       |
| EPI_ISI_470624 | hCoV-19/Brazil/RJ0256/2020     | South America / Brazil / Rio de Janeiro   | 2020-04-03 | Laboratório de Virologia Molecular / UFRRJ                                                                                                                                                                                                                                | Bioinformatics Laboratory / LUNCC                                                                                                                | Alexandra Gerber, Ana Paula Guimarães, Luiz Gonzaga Paula de Almeida, Ronaldo da Silva Francisco Junior, Mariane Talon, Filipe Romero, Alia Duque Rossi, Terezinha Maria Pereira, working group UFRRJ, Jacqueline Goes de Jesus, Ingra Morales Claro, Ester Cederia Sabino, Nuno Rodrigues Faria, CADDE-group, Laboratório Hermes Pardini, Laboratório Simile, working group UFMG, Amílcar Tanuri, Carolina Voloch, Renato Santana Aguiar e Ana Tereza Vasconcelos                                                                                                                                                                                                                                                                                                                                                                                                                                                                                                                                                                                                                                                                                                                                                                                                                                       |
| EPI_ISI_470625 | hCoV-19/Brazil/RJ0257/2020     | South America / Brazil / Rio de Janeiro   | 2020-04-06 | Laboratório de Virologia Molecular / UFRRJ                                                                                                                                                                                                                                | Bioinformatics Laboratory / LUNCC                                                                                                                | Alexandra Gerber, Ana Paula Guimarães, Luiz Gonzaga Paula de Almeida, Ronaldo da Silva Francisco Junior, Mariane Talon, Filipe Romero, Alia Duque Rossi, Terezinha Maria Pereira, working group UFRRJ, Jacqueline Goes de Jesus, Ingra Morales Claro, Ester Cederia Sabino, Nuno Rodrigues Faria, CADDE-group, Laboratório Hermes Pardini, Laboratório Simile, working group UFMG, Amílcar Tanuri, Carolina Voloch, Renato Santana Aguiar e Ana Tereza Vasconcelos                                                                                                                                                                                                                                                                                                                                                                                                                                                                                                                                                                                                                                                                                                                                                                                                                                       |
| EPI_ISI_470626 | hCoV-19/Brazil/RJ0259/2020     | South America / Brazil / Rio de Janeiro   | 2020-04-07 | Laboratório de Virologia Molecular / UFRRJ                                                                                                                                                                                                                                | Bioinformatics Laboratory / LUNCC                                                                                                                | Alexandra Gerber, Ana Paula Guimarães, Luiz Gonzaga Paula de Almeida, Ronaldo da Silva Francisco Junior, Mariane Talon, Filipe Romero, Alia Duque Rossi, Terezinha Maria Pereira, working group UFRRJ, Jacqueline Goes de Jesus, Ingra Morales Claro, Ester Cederia Sabino, Nuno Rodrigues Faria, CADDE-group, Laboratório Hermes Pardini, Laboratório Simile, working group UFMG, Amílcar Tanuri, Carolina Voloch, Renato Santana Aguiar e Ana Tereza Vasconcelos                                                                                                                                                                                                                                                                                                                                                                                                                                                                                                                                                                                                                                                                                                                                                                                                                                       |

[illegible]

|                |                              |                                                   |            |                                                   |                                                                                  |                                                                                                                                                                               |
|----------------|------------------------------|---------------------------------------------------|------------|---------------------------------------------------|----------------------------------------------------------------------------------|-------------------------------------------------------------------------------------------------------------------------------------------------------------------------------|
| EPI_ISL_471164 | hCoV-19/Gambia/0547/2020     | Africa / Gambia / Kombo                           | 2020-04-30 | MRCC at LSHTM Genomics lab                        | MRCC at LSHTM Genomics lab                                                       | Sesay et al                                                                                                                                                                   |
| EPI_ISL_471166 | hCoV-19/Gambia/1090/2020     | Africa / Gambia / Kombo                           | 2020-05-04 | MRCC at LSHTM Genomics lab                        | MRCC at LSHTM Genomics lab                                                       | Sesay et al                                                                                                                                                                   |
| EPI_ISL_471167 | hCoV-19/Gambia/1094/2020     | Africa / Gambia / Kombo                           | 2020-05-04 | MRCC at LSHTM Genomics lab                        | MRCC at LSHTM Genomics lab                                                       | Sesay et al                                                                                                                                                                   |
| EPI_ISL_471168 | hCoV-19/Gambia/1251/2020     | Africa / Gambia / Kombo                           | 2020-05-07 | MRCC at LSHTM Genomics lab                        | MRCC at LSHTM Genomics lab                                                       | Sesay et al                                                                                                                                                                   |
| EPI_ISL_471169 | hCoV-19/Gambia/1584/2020     | Africa / Gambia / Kombo                           | 2020-05-07 | MRCC at LSHTM Genomics lab                        | MRCC at LSHTM Genomics lab                                                       | Sesay et al                                                                                                                                                                   |
| EPI_ISL_471171 | hCoV-19/Gambia/1777/2020     | Africa / Gambia / Kombo                           | 2020-05-07 | MRCC at LSHTM Genomics lab                        | MRCC at LSHTM Genomics lab                                                       | Sesay et al                                                                                                                                                                   |
| EPI_ISL_471647 | hCoV-19/Brazil/SP-526/2020   | South America / Brazil / Sao Paulo / Barueri      | 2020-04-30 | Hospital Municipal de Barueri Dr. Francisco Moran | Instituto Adolfo Lutz, Interdisciplinary Procedures Center, Strategic Laboratory | Claudio Tavares Sacchi, Claudia Regina Gonçalves, Erica Valesa Ramos Gomes                                                                                                    |
| EPI_ISL_471648 | hCoV-19/Brazil/SP-527/2020   | South America / Brazil / Sao Paulo / Itapetininga | 2020-04-30 | UBS e Pronto Socorro Jd. Jacira                   | Instituto Adolfo Lutz, Interdisciplinary Procedures Center, Strategic Laboratory | Claudio Tavares Sacchi, Claudia Regina Gonçalves, Erica Valesa Ramos Gomes                                                                                                    |
| EPI_ISL_475511 | hCoV-19/Sweden/20-14131/2020 | Europe / Sweden / Skåne                           | 2020-04-30 | Örnsköldsvikens VC                                | The Public Health Agency of Sweden                                               | Oskar Karlsson Lindqvist, Maria Lind Karberg, Mattias Haukland, Reza Adavi, Olov Svartström, Anna-Malin Linde, Sandra Brodén, Mia Blyting, Anna Rieberg, Karin Tegmark-Wisell |
| EPI_ISL_475512 | hCoV-19/Sweden/20-14137/2020 | Europe / Sweden / Västra Götaland                 | 2020-04-30 | Din Klinik                                        | The Public Health Agency of Sweden                                               | Oskar Karlsson Lindqvist, Maria Lind Karberg, Mattias Haukland, Reza Adavi, Olov Svartström, Anna-Malin Linde, Sandra Brodén, Mia Blyting, Anna Rieberg, Karin Tegmark-Wisell |
| EPI_ISL_475513 | hCoV-19/Sweden/20-14178/2020 | Europe / Sweden / Stockholm                       | 2020-04-30 | Huddinge VC                                       | The Public Health Agency of Sweden                                               | Oskar Karlsson Lindqvist, Maria Lind Karberg, Mattias Haukland, Reza Adavi, Olov Svartström, Anna-Malin Linde, Sandra Brodén, Mia Blyting, Anna Rieberg, Karin Tegmark-Wisell |
| EPI_ISL_475514 | hCoV-19/Sweden/20-14387/2020 | Europe / Sweden / Uppsala                         | 2020-05-04 | Uppsala Naraskut Aleris                           | The Public Health Agency of Sweden                                               | Oskar Karlsson Lindqvist, Maria Lind Karberg, Mattias Haukland, Reza Adavi, Olov Svartström, Anna-Malin Linde, Sandra Brodén, Mia Blyting, Anna Rieberg, Karin Tegmark-Wisell |
| EPI_ISL_475515 | hCoV-19/Sweden/20-14509/2020 | Europe / Sweden / Västmanland                     | 2020-05-12 | Läkargruppen                                      | The Public Health Agency of Sweden                                               | Oskar Karlsson Lindqvist, Maria Lind Karberg, Mattias Haukland, Reza Adavi, Olov Svartström, Anna-Malin Linde, Sandra Brodén, Mia Blyting, Anna Rieberg, Karin Tegmark-Wisell |
| EPI_ISL_475516 | hCoV-19/Sweden/20-14518/2020 | Europe / Sweden / Uppsala                         | 2020-05-10 | Uppsala Naraskut Aleris                           | The Public Health Agency of Sweden                                               | Oskar Karlsson Lindqvist, Maria Lind Karberg, Mattias Haukland, Reza Adavi, Olov Svartström, Anna-Malin Linde, Sandra Brodén, Mia Blyting, Anna Rieberg, Karin Tegmark-Wisell |
| EPI_ISL_475517 | hCoV-19/Sweden/20-14519/2020 | Europe / Sweden / Uppsala                         | 2020-05-10 | Uppsala Naraskut Aleris                           | The Public Health Agency of Sweden                                               | Oskar Karlsson Lindqvist, Maria Lind Karberg, Mattias Haukland, Reza Adavi, Olov Svartström, Anna-Malin Linde, Sandra Brodén, Mia Blyting, Anna Rieberg, Karin Tegmark-Wisell |
| EPI_ISL_475518 | hCoV-19/Sweden/20-14679/2020 | Europe / Sweden / Stockholm                       | 2020-05-14 | Trolbäckens VC                                    | The Public Health Agency of Sweden                                               | Oskar Karlsson Lindqvist, Maria Lind Karberg, Mattias Haukland, Reza Adavi, Olov Svartström, Anna-Malin Linde, Sandra Brodén, Mia Blyting, Anna Rieberg, Karin Tegmark-Wisell |
| EPI_ISL_475519 | hCoV-19/Sweden/20-14682/2020 | Europe / Sweden / Dalarna                         | 2020-05-14 | Ona VC                                            | The Public Health Agency of Sweden                                               | Oskar Karlsson Lindqvist, Maria Lind Karberg, Mattias Haukland, Reza Adavi, Olov Svartström, Anna-Malin Linde, Sandra Brodén, Mia Blyting, Anna Rieberg, Karin Tegmark-Wisell |
| EPI_ISL_475520 | hCoV-19/Sweden/20-14734/2020 | Europe / Sweden / Östergötland                    | 2020-05-18 | Vårdcentralen Brinken                             | The Public Health Agency of Sweden                                               | Oskar Karlsson Lindqvist, Maria Lind Karberg, Mattias Haukland, Reza Adavi, Olov Svartström, Anna-Malin Linde, Sandra Brodén, Mia Blyting, Anna Rieberg, Karin Tegmark-Wisell |
| EPI_ISL_475521 | hCoV-19/Sweden/20-14828/2020 | Europe / Sweden / Uppsala                         | 2020-05-19 | Ullnäs Vårdcentral                                | The Public Health Agency of Sweden                                               | Oskar Karlsson Lindqvist, Maria Lind Karberg, Mattias Haukland, Reza Adavi, Olov Svartström, Anna-Malin Linde, Sandra Brodén, Mia Blyting, Anna Rieberg, Karin Tegmark-Wisell |
| EPI_ISL_475522 | hCoV-19/Sweden/20-14937/2020 | Europe / Sweden / Stockholm                       | 2020-05-25 | Huddinge VC                                       | The Public Health Agency of Sweden                                               | Oskar Karlsson Lindqvist, Maria Lind Karberg, Mattias Haukland, Reza Adavi, Olov Svartström, Anna-Malin Linde, Sandra Brodén, Mia Blyting, Anna Rieberg, Karin Tegmark-Wisell |
| EPI_ISL_475523 | hCoV-19/Sweden/20-14941/2020 | Europe / Sweden / Stockholm                       | 2020-05-25 | Huddinge VC                                       | The Public Health Agency of Sweden                                               | Oskar Karlsson Lindqvist, Maria Lind Karberg, Mattias Haukland, Reza Adavi, Olov Svartström, Anna-Malin Linde, Sandra Brodén, Mia Blyting, Anna Rieberg, Karin Tegmark-Wisell |
| EPI_ISL_475524 | hCoV-19/Sweden/20-14985/2020 | Europe / Sweden / Västra Götaland                 | 2020-05-26 | Nahalsen Sjöbo vårdcentral                        | The Public Health Agency of Sweden                                               | Oskar Karlsson Lindqvist, Maria Lind Karberg, Mattias Haukland, Reza Adavi, Olov Svartström, Anna-Malin Linde, Sandra Brodén, Mia Blyting, Anna Rieberg, Karin Tegmark-Wisell |
| EPI_ISL_475525 | hCoV-19/Sweden/20-15194/2020 | Europe / Sweden / Stockholm                       | 2020-05-28 | Huddinge VC                                       | The Public Health Agency of Sweden                                               | Oskar Karlsson Lindqvist, Maria Lind Karberg, Mattias Haukland, Reza Adavi, Olov Svartström, Anna-Malin Linde, Sandra Brodén, Mia Blyting, Anna Rieberg, Karin Tegmark-Wisell |
| EPI_ISL_475526 | hCoV-19/Sweden/20-15616/2020 | Europe / Sweden / Uppsala                         | 2020-05-27 | Uppsala Naraskut Aleris                           | The Public Health Agency of Sweden                                               | Oskar Karlsson Lindqvist, Maria Lind Karberg, Mattias Haukland, Reza Adavi, Olov Svartström, Anna-Malin Linde, Sandra Brodén, Mia Blyting, Anna Rieberg, Karin Tegmark-Wisell |
| EPI_ISL_475527 | hCoV-19/Sweden/20-15753/2020 | Europe / Sweden / Uppsala                         | 2020-05-27 | Uppsala Naraskut Aleris                           | The Public Health Agency of Sweden                                               | Oskar Karlsson Lindqvist, Maria Lind Karberg, Mattias Haukland, Reza Adavi, Olov Svartström, Anna-Malin Linde, Sandra Brodén, Mia Blyting, Anna Rieberg, Karin Tegmark-Wisell |
| EPI_ISL_475528 | hCoV-19/Sweden/20-15755/2020 | Europe / Sweden / Västra Götaland                 | 2020-05-27 | Omtanken Grimmered                                | The Public Health Agency of Sweden                                               | Oskar Karlsson Lindqvist, Maria Lind Karberg, Mattias Haukland, Reza Adavi, Olov Svartström, Anna-Malin Linde, Sandra Brodén, Mia Blyting, Anna Rieberg, Karin Tegmark-Wisell |
| EPI_ISL_475529 | hCoV-19/Sweden/20-15780/2020 | Europe / Sweden / Västmanland                     | 2020-05-28 | Kungsörs VC                                       | The Public Health Agency of Sweden                                               | Oskar Karlsson Lindqvist, Maria Lind Karberg, Mattias Haukland, Reza Adavi, Olov Svartström, Anna-Malin Linde, Sandra Brodén, Mia Blyting, Anna Rieberg, Karin Tegmark-Wisell |
| EPI_ISL_475530 | hCoV-19/Sweden/20-15829/2020 | Europe / Sweden / Västmanland                     | 2020-06-03 | Kungsörs VC                                       | The Public Health Agency of Sweden                                               | Oskar Karlsson Lindqvist, Maria Lind Karberg, Mattias Haukland, Reza Adavi, Olov Svartström, Anna-Malin Linde, Sandra Brodén, Mia Blyting, Anna Rieberg, Karin Tegmark-Wisell |
| EPI_ISL_475531 | hCoV-19/Sweden/              |                                                   |            |                                                   |                                                                                  |                                                                                                                                                                               |

|                |                                    |                                  |            |                                                             |                                                             |                                                                                                                                                                                                                                                                                                                                                                                                                                                                                                                                                                                                                                                                                                                                                                                                                                                                                                                                                                                                                                                                                                                                                                                                                                                                                                                                                                                                                                                                                                                                                                                                                                                                                                                                                                                                                                                                                                                                                                                                                                                                                                                                                                                                                                                                                                                                                                                                                                                                                                                                                                                                                                                                                                                                                                                                                                                                                                                                                                                                                                                                                                                                                                                                                                                                                                                                                                                                                                                                                                                                                                                                                                                                                                                                                                                                                                                                                                                                                                                                                                                                                                                                                                                                                                                                                                                                                                                                                                                                                                                                                                                                                                                                                                                                                                                                                                                                                                                                                                                                                                                                                                                                                                                                                                                                                                                                                                                                                                                                                                                                                                                                                                                                                                                                                                                                                                                                                                                                                                                                                                                                                                                                                                                                                                                                                                                                                                                                                                                                                                                                                                                                                                                                                                                                                                                                                                                                                                                                                                                                                                                                                                                                                                                                                                                                                                                                                                                                                                                              |
|----------------|------------------------------------|----------------------------------|------------|-------------------------------------------------------------|-------------------------------------------------------------|--------------------------------------------------------------------------------------------------------------------------------------------------------------------------------------------------------------------------------------------------------------------------------------------------------------------------------------------------------------------------------------------------------------------------------------------------------------------------------------------------------------------------------------------------------------------------------------------------------------------------------------------------------------------------------------------------------------------------------------------------------------------------------------------------------------------------------------------------------------------------------------------------------------------------------------------------------------------------------------------------------------------------------------------------------------------------------------------------------------------------------------------------------------------------------------------------------------------------------------------------------------------------------------------------------------------------------------------------------------------------------------------------------------------------------------------------------------------------------------------------------------------------------------------------------------------------------------------------------------------------------------------------------------------------------------------------------------------------------------------------------------------------------------------------------------------------------------------------------------------------------------------------------------------------------------------------------------------------------------------------------------------------------------------------------------------------------------------------------------------------------------------------------------------------------------------------------------------------------------------------------------------------------------------------------------------------------------------------------------------------------------------------------------------------------------------------------------------------------------------------------------------------------------------------------------------------------------------------------------------------------------------------------------------------------------------------------------------------------------------------------------------------------------------------------------------------------------------------------------------------------------------------------------------------------------------------------------------------------------------------------------------------------------------------------------------------------------------------------------------------------------------------------------------------------------------------------------------------------------------------------------------------------------------------------------------------------------------------------------------------------------------------------------------------------------------------------------------------------------------------------------------------------------------------------------------------------------------------------------------------------------------------------------------------------------------------------------------------------------------------------------------------------------------------------------------------------------------------------------------------------------------------------------------------------------------------------------------------------------------------------------------------------------------------------------------------------------------------------------------------------------------------------------------------------------------------------------------------------------------------------------------------------------------------------------------------------------------------------------------------------------------------------------------------------------------------------------------------------------------------------------------------------------------------------------------------------------------------------------------------------------------------------------------------------------------------------------------------------------------------------------------------------------------------------------------------------------------------------------------------------------------------------------------------------------------------------------------------------------------------------------------------------------------------------------------------------------------------------------------------------------------------------------------------------------------------------------------------------------------------------------------------------------------------------------------------------------------------------------------------------------------------------------------------------------------------------------------------------------------------------------------------------------------------------------------------------------------------------------------------------------------------------------------------------------------------------------------------------------------------------------------------------------------------------------------------------------------------------------------------------------------------------------------------------------------------------------------------------------------------------------------------------------------------------------------------------------------------------------------------------------------------------------------------------------------------------------------------------------------------------------------------------------------------------------------------------------------------------------------------------------------------------------------------------------------------------------------------------------------------------------------------------------------------------------------------------------------------------------------------------------------------------------------------------------------------------------------------------------------------------------------------------------------------------------------------------------------------------------------------------------------------------------------------------------------------------------------------------------------------------------------------------------------------------------------------------------------------------------------------------------------------------------------------------------------------------------------------------------------------------------------------------------------------------------------------------------------------------------------------------------------------------------------------------------------------------------|
| EPI_ISI_476806 | hCoV-19/Singapore/471/2020         | Asia / Singapore                 | 2020-03-15 | Department of Laboratory Medicine<br>Tan Tock Seng Hospital | Department of Laboratory Medicine<br>Tan Tock Seng Hospital | Chen YYY, Zair X, L. C., Tang WY, Maurer-Stroh S, Barkham TMS, Nagarajan N<br>Sessions OM                                                                                                                                                                                                                                                                                                                                                                                                                                                                                                                                                                                                                                                                                                                                                                                                                                                                                                                                                                                                                                                                                                                                                                                                                                                                                                                                                                                                                                                                                                                                                                                                                                                                                                                                                                                                                                                                                                                                                                                                                                                                                                                                                                                                                                                                                                                                                                                                                                                                                                                                                                                                                                                                                                                                                                                                                                                                                                                                                                                                                                                                                                                                                                                                                                                                                                                                                                                                                                                                                                                                                                                                                                                                                                                                                                                                                                                                                                                                                                                                                                                                                                                                                                                                                                                                                                                                                                                                                                                                                                                                                                                                                                                                                                                                                                                                                                                                                                                                                                                                                                                                                                                                                                                                                                                                                                                                                                                                                                                                                                                                                                                                                                                                                                                                                                                                                                                                                                                                                                                                                                                                                                                                                                                                                                                                                                                                                                                                                                                                                                                                                                                                                                                                                                                                                                                                                                                                                                                                                                                                                                                                                                                                                                                                                                                                                                                                                                    |
| EPI_ISI_476807 | hCoV-19/Singapore/472/2020         | Asia / Singapore                 | 2020-03-13 | Department of Laboratory Medicine<br>Tan Tock Seng Hospital | Department of Laboratory Medicine<br>Tan Tock Seng Hospital | Chen YYY, Zair X, L. C., Tang WY, Maurer-Stroh S, Barkham TMS, Nagarajan N<br>Sessions OM                                                                                                                                                                                                                                                                                                                                                                                                                                                                                                                                                                                                                                                                                                                                                                                                                                                                                                                                                                                                                                                                                                                                                                                                                                                                                                                                                                                                                                                                                                                                                                                                                                                                                                                                                                                                                                                                                                                                                                                                                                                                                                                                                                                                                                                                                                                                                                                                                                                                                                                                                                                                                                                                                                                                                                                                                                                                                                                                                                                                                                                                                                                                                                                                                                                                                                                                                                                                                                                                                                                                                                                                                                                                                                                                                                                                                                                                                                                                                                                                                                                                                                                                                                                                                                                                                                                                                                                                                                                                                                                                                                                                                                                                                                                                                                                                                                                                                                                                                                                                                                                                                                                                                                                                                                                                                                                                                                                                                                                                                                                                                                                                                                                                                                                                                                                                                                                                                                                                                                                                                                                                                                                                                                                                                                                                                                                                                                                                                                                                                                                                                                                                                                                                                                                                                                                                                                                                                                                                                                                                                                                                                                                                                                                                                                                                                                                                                                    |
| EPI_ISI_476808 | hCoV-19/Singapore/49/nan/2020      | Asia / Singapore                 | 2020-03-07 | Department of Laboratory Medicine<br>Tan Tock Seng Hospital | Department of Laboratory Medicine<br>Tan Tock Seng Hospital | Chen YYY, Zair X, L. C., Tang WY, Maurer-Stroh S, Barkham TMS, Nagarajan N<br>Sessions OM                                                                                                                                                                                                                                                                                                                                                                                                                                                                                                                                                                                                                                                                                                                                                                                                                                                                                                                                                                                                                                                                                                                                                                                                                                                                                                                                                                                                                                                                                                                                                                                                                                                                                                                                                                                                                                                                                                                                                                                                                                                                                                                                                                                                                                                                                                                                                                                                                                                                                                                                                                                                                                                                                                                                                                                                                                                                                                                                                                                                                                                                                                                                                                                                                                                                                                                                                                                                                                                                                                                                                                                                                                                                                                                                                                                                                                                                                                                                                                                                                                                                                                                                                                                                                                                                                                                                                                                                                                                                                                                                                                                                                                                                                                                                                                                                                                                                                                                                                                                                                                                                                                                                                                                                                                                                                                                                                                                                                                                                                                                                                                                                                                                                                                                                                                                                                                                                                                                                                                                                                                                                                                                                                                                                                                                                                                                                                                                                                                                                                                                                                                                                                                                                                                                                                                                                                                                                                                                                                                                                                                                                                                                                                                                                                                                                                                                                                                    |
| EPI_ISI_476809 | hCoV-19/Singapore/473/2020         | Asia / Singapore                 | 2020-03-09 | Department of Laboratory Medicine<br>Tan Tock Seng Hospital | Department of Laboratory Medicine<br>Tan Tock Seng Hospital | Chen YYY, Zair X, L. C., Tang WY, Maurer-Stroh S, Barkham TMS, Nagarajan N<br>Sessions OM                                                                                                                                                                                                                                                                                                                                                                                                                                                                                                                                                                                                                                                                                                                                                                                                                                                                                                                                                                                                                                                                                                                                                                                                                                                                                                                                                                                                                                                                                                                                                                                                                                                                                                                                                                                                                                                                                                                                                                                                                                                                                                                                                                                                                                                                                                                                                                                                                                                                                                                                                                                                                                                                                                                                                                                                                                                                                                                                                                                                                                                                                                                                                                                                                                                                                                                                                                                                                                                                                                                                                                                                                                                                                                                                                                                                                                                                                                                                                                                                                                                                                                                                                                                                                                                                                                                                                                                                                                                                                                                                                                                                                                                                                                                                                                                                                                                                                                                                                                                                                                                                                                                                                                                                                                                                                                                                                                                                                                                                                                                                                                                                                                                                                                                                                                                                                                                                                                                                                                                                                                                                                                                                                                                                                                                                                                                                                                                                                                                                                                                                                                                                                                                                                                                                                                                                                                                                                                                                                                                                                                                                                                                                                                                                                                                                                                                                                                    |
| EPI_ISI_476810 | hCoV-19/Singapore/474/2020         | Asia / Singapore                 | 2020-03-08 | Department of Laboratory Medicine<br>Tan Tock Seng Hospital | Department of Laboratory Medicine<br>Tan Tock Seng Hospital | Chen YYY, Zair X, L. C., Tang WY, Maurer-Stroh S, Barkham TMS, Nagarajan N<br>Sessions OM                                                                                                                                                                                                                                                                                                                                                                                                                                                                                                                                                                                                                                                                                                                                                                                                                                                                                                                                                                                                                                                                                                                                                                                                                                                                                                                                                                                                                                                                                                                                                                                                                                                                                                                                                                                                                                                                                                                                                                                                                                                                                                                                                                                                                                                                                                                                                                                                                                                                                                                                                                                                                                                                                                                                                                                                                                                                                                                                                                                                                                                                                                                                                                                                                                                                                                                                                                                                                                                                                                                                                                                                                                                                                                                                                                                                                                                                                                                                                                                                                                                                                                                                                                                                                                                                                                                                                                                                                                                                                                                                                                                                                                                                                                                                                                                                                                                                                                                                                                                                                                                                                                                                                                                                                                                                                                                                                                                                                                                                                                                                                                                                                                                                                                                                                                                                                                                                                                                                                                                                                                                                                                                                                                                                                                                                                                                                                                                                                                                                                                                                                                                                                                                                                                                                                                                                                                                                                                                                                                                                                                                                                                                                                                                                                                                                                                                                                                    |
| EPI_ISI_476811 | hCoV-19/Singapore/475/2020         | Asia / Singapore                 | 2020-03-09 | Department of Laboratory Medicine<br>Tan Tock Seng Hospital | Department of Laboratory Medicine<br>Tan Tock Seng Hospital | Chen YYY, Zair X, L. C., Tang WY, Maurer-Stroh S, Barkham TMS, Nagarajan N<br>Sessions OM                                                                                                                                                                                                                                                                                                                                                                                                                                                                                                                                                                                                                                                                                                                                                                                                                                                                                                                                                                                                                                                                                                                                                                                                                                                                                                                                                                                                                                                                                                                                                                                                                                                                                                                                                                                                                                                                                                                                                                                                                                                                                                                                                                                                                                                                                                                                                                                                                                                                                                                                                                                                                                                                                                                                                                                                                                                                                                                                                                                                                                                                                                                                                                                                                                                                                                                                                                                                                                                                                                                                                                                                                                                                                                                                                                                                                                                                                                                                                                                                                                                                                                                                                                                                                                                                                                                                                                                                                                                                                                                                                                                                                                                                                                                                                                                                                                                                                                                                                                                                                                                                                                                                                                                                                                                                                                                                                                                                                                                                                                                                                                                                                                                                                                                                                                                                                                                                                                                                                                                                                                                                                                                                                                                                                                                                                                                                                                                                                                                                                                                                                                                                                                                                                                                                                                                                                                                                                                                                                                                                                                                                                                                                                                                                                                                                                                                                                                    |
| EPI_ISI_476812 | hCoV-19/Singapore/476/2020         | Asia / Singapore                 | 2020-03-10 | Department of Laboratory Medicine<br>Tan Tock Seng Hospital | Department of Laboratory Medicine<br>Tan Tock Seng Hospital | Chen YYY, Zair X, L. C., Tang WY, Maurer-Stroh S, Barkham TMS, Nagarajan N<br>Sessions OM                                                                                                                                                                                                                                                                                                                                                                                                                                                                                                                                                                                                                                                                                                                                                                                                                                                                                                                                                                                                                                                                                                                                                                                                                                                                                                                                                                                                                                                                                                                                                                                                                                                                                                                                                                                                                                                                                                                                                                                                                                                                                                                                                                                                                                                                                                                                                                                                                                                                                                                                                                                                                                                                                                                                                                                                                                                                                                                                                                                                                                                                                                                                                                                                                                                                                                                                                                                                                                                                                                                                                                                                                                                                                                                                                                                                                                                                                                                                                                                                                                                                                                                                                                                                                                                                                                                                                                                                                                                                                                                                                                                                                                                                                                                                                                                                                                                                                                                                                                                                                                                                                                                                                                                                                                                                                                                                                                                                                                                                                                                                                                                                                                                                                                                                                                                                                                                                                                                                                                                                                                                                                                                                                                                                                                                                                                                                                                                                                                                                                                                                                                                                                                                                                                                                                                                                                                                                                                                                                                                                                                                                                                                                                                                                                                                                                                                                                                    |
| EPI_ISI_476813 | hCoV-19/Singapore/477/2020         | Asia / Singapore                 | 2020-03-10 | Department of Laboratory Medicine<br>Tan Tock Seng Hospital | Department of Laboratory Medicine<br>Tan Tock Seng Hospital | Chen YYY, Zair X, L. C., Tang WY, Maurer-Stroh S, Barkham TMS, Nagarajan N<br>Sessions OM                                                                                                                                                                                                                                                                                                                                                                                                                                                                                                                                                                                                                                                                                                                                                                                                                                                                                                                                                                                                                                                                                                                                                                                                                                                                                                                                                                                                                                                                                                                                                                                                                                                                                                                                                                                                                                                                                                                                                                                                                                                                                                                                                                                                                                                                                                                                                                                                                                                                                                                                                                                                                                                                                                                                                                                                                                                                                                                                                                                                                                                                                                                                                                                                                                                                                                                                                                                                                                                                                                                                                                                                                                                                                                                                                                                                                                                                                                                                                                                                                                                                                                                                                                                                                                                                                                                                                                                                                                                                                                                                                                                                                                                                                                                                                                                                                                                                                                                                                                                                                                                                                                                                                                                                                                                                                                                                                                                                                                                                                                                                                                                                                                                                                                                                                                                                                                                                                                                                                                                                                                                                                                                                                                                                                                                                                                                                                                                                                                                                                                                                                                                                                                                                                                                                                                                                                                                                                                                                                                                                                                                                                                                                                                                                                                                                                                                                                                    |
| EPI_ISI_476815 | hCoV-19/Singapore/479/2020         | Asia / Singapore                 | 2020-03-11 | Department of Laboratory Medicine<br>Tan Tock Seng Hospital | Department of Laboratory Medicine<br>Tan Tock Seng Hospital | Chen YYY, Zair X, L. C., Tang WY, Maurer-Stroh S, Barkham TMS, Nagarajan N<br>Sessions OM                                                                                                                                                                                                                                                                                                                                                                                                                                                                                                                                                                                                                                                                                                                                                                                                                                                                                                                                                                                                                                                                                                                                                                                                                                                                                                                                                                                                                                                                                                                                                                                                                                                                                                                                                                                                                                                                                                                                                                                                                                                                                                                                                                                                                                                                                                                                                                                                                                                                                                                                                                                                                                                                                                                                                                                                                                                                                                                                                                                                                                                                                                                                                                                                                                                                                                                                                                                                                                                                                                                                                                                                                                                                                                                                                                                                                                                                                                                                                                                                                                                                                                                                                                                                                                                                                                                                                                                                                                                                                                                                                                                                                                                                                                                                                                                                                                                                                                                                                                                                                                                                                                                                                                                                                                                                                                                                                                                                                                                                                                                                                                                                                                                                                                                                                                                                                                                                                                                                                                                                                                                                                                                                                                                                                                                                                                                                                                                                                                                                                                                                                                                                                                                                                                                                                                                                                                                                                                                                                                                                                                                                                                                                                                                                                                                                                                                                                                    |
| EPI_ISI_476816 | hCoV-19/Singapore/482/2020         | Asia / Singapore                 | 2020-03-15 | Department of Laboratory Medicine<br>Tan Tock Seng Hospital | Department of Laboratory Medicine<br>Tan Tock Seng Hospital | Chen YYY, Zair X, L. C., Tang WY, Maurer-Stroh S, Barkham TMS, Nagarajan N<br>Sessions OM                                                                                                                                                                                                                                                                                                                                                                                                                                                                                                                                                                                                                                                                                                                                                                                                                                                                                                                                                                                                                                                                                                                                                                                                                                                                                                                                                                                                                                                                                                                                                                                                                                                                                                                                                                                                                                                                                                                                                                                                                                                                                                                                                                                                                                                                                                                                                                                                                                                                                                                                                                                                                                                                                                                                                                                                                                                                                                                                                                                                                                                                                                                                                                                                                                                                                                                                                                                                                                                                                                                                                                                                                                                                                                                                                                                                                                                                                                                                                                                                                                                                                                                                                                                                                                                                                                                                                                                                                                                                                                                                                                                                                                                                                                                                                                                                                                                                                                                                                                                                                                                                                                                                                                                                                                                                                                                                                                                                                                                                                                                                                                                                                                                                                                                                                                                                                                                                                                                                                                                                                                                                                                                                                                                                                                                                                                                                                                                                                                                                                                                                                                                                                                                                                                                                                                                                                                                                                                                                                                                                                                                                                                                                                                                                                                                                                                                                                                    |
| EPI_ISI_476817 | hCoV-19/Singapore/483/2020         | Asia / Singapore                 | 2020-03-16 | Department of Laboratory Medicine<br>Tan Tock Seng Hospital | Department of Laboratory Medicine<br>Tan Tock Seng Hospital | Chen YYY, Zair X, L. C., Tang WY, Maurer-Stroh S, Barkham TMS, Nagarajan N<br>Sessions OM                                                                                                                                                                                                                                                                                                                                                                                                                                                                                                                                                                                                                                                                                                                                                                                                                                                                                                                                                                                                                                                                                                                                                                                                                                                                                                                                                                                                                                                                                                                                                                                                                                                                                                                                                                                                                                                                                                                                                                                                                                                                                                                                                                                                                                                                                                                                                                                                                                                                                                                                                                                                                                                                                                                                                                                                                                                                                                                                                                                                                                                                                                                                                                                                                                                                                                                                                                                                                                                                                                                                                                                                                                                                                                                                                                                                                                                                                                                                                                                                                                                                                                                                                                                                                                                                                                                                                                                                                                                                                                                                                                                                                                                                                                                                                                                                                                                                                                                                                                                                                                                                                                                                                                                                                                                                                                                                                                                                                                                                                                                                                                                                                                                                                                                                                                                                                                                                                                                                                                                                                                                                                                                                                                                                                                                                                                                                                                                                                                                                                                                                                                                                                                                                                                                                                                                                                                                                                                                                                                                                                                                                                                                                                                                                                                                                                                                                                                    |
| EPI_ISI_476818 | hCoV-19/Singapore/455/nan/2020     | Asia / Singapore                 | 2020-03-20 | Department of Laboratory Medicine<br>Tan Tock Seng Hospital | Department of Laboratory Medicine<br>Tan Tock Seng Hospital | Chen YYY, Zair X, L. C., Tang WY, Maurer-Stroh S, Barkham TMS, Nagarajan N<br>Sessions OM                                                                                                                                                                                                                                                                                                                                                                                                                                                                                                                                                                                                                                                                                                                                                                                                                                                                                                                                                                                                                                                                                                                                                                                                                                                                                                                                                                                                                                                                                                                                                                                                                                                                                                                                                                                                                                                                                                                                                                                                                                                                                                                                                                                                                                                                                                                                                                                                                                                                                                                                                                                                                                                                                                                                                                                                                                                                                                                                                                                                                                                                                                                                                                                                                                                                                                                                                                                                                                                                                                                                                                                                                                                                                                                                                                                                                                                                                                                                                                                                                                                                                                                                                                                                                                                                                                                                                                                                                                                                                                                                                                                                                                                                                                                                                                                                                                                                                                                                                                                                                                                                                                                                                                                                                                                                                                                                                                                                                                                                                                                                                                                                                                                                                                                                                                                                                                                                                                                                                                                                                                                                                                                                                                                                                                                                                                                                                                                                                                                                                                                                                                                                                                                                                                                                                                                                                                                                                                                                                                                                                                                                                                                                                                                                                                                                                                                                                                    |
| EPI_ISI_476819 | hCoV-19/Singapore/27/nan/2020      | Asia / Singapore                 | 2020-03-22 | Department of Laboratory Medicine<br>Tan Tock Seng Hospital | Department of Laboratory Medicine<br>Tan Tock Seng Hospital | Chen YYY, Zair X, L. C., Tang WY, Maurer-Stroh S, Barkham TMS, Nagarajan N<br>Sessions OM                                                                                                                                                                                                                                                                                                                                                                                                                                                                                                                                                                                                                                                                                                                                                                                                                                                                                                                                                                                                                                                                                                                                                                                                                                                                                                                                                                                                                                                                                                                                                                                                                                                                                                                                                                                                                                                                                                                                                                                                                                                                                                                                                                                                                                                                                                                                                                                                                                                                                                                                                                                                                                                                                                                                                                                                                                                                                                                                                                                                                                                                                                                                                                                                                                                                                                                                                                                                                                                                                                                                                                                                                                                                                                                                                                                                                                                                                                                                                                                                                                                                                                                                                                                                                                                                                                                                                                                                                                                                                                                                                                                                                                                                                                                                                                                                                                                                                                                                                                                                                                                                                                                                                                                                                                                                                                                                                                                                                                                                                                                                                                                                                                                                                                                                                                                                                                                                                                                                                                                                                                                                                                                                                                                                                                                                                                                                                                                                                                                                                                                                                                                                                                                                                                                                                                                                                                                                                                                                                                                                                                                                                                                                                                                                                                                                                                                                                                    |
| EPI_ISI_476820 | hCoV-19/Singapore/486/2020         | Asia / Singapore                 | 2020-03-25 | Department of Laboratory Medicine<br>Tan Tock Seng Hospital | Department of Laboratory Medicine<br>Tan Tock Seng Hospital | Chen YYY, Zair X, L. C., Tang WY, Maurer-Stroh S, Barkham TMS, Nagarajan N<br>Sessions OM                                                                                                                                                                                                                                                                                                                                                                                                                                                                                                                                                                                                                                                                                                                                                                                                                                                                                                                                                                                                                                                                                                                                                                                                                                                                                                                                                                                                                                                                                                                                                                                                                                                                                                                                                                                                                                                                                                                                                                                                                                                                                                                                                                                                                                                                                                                                                                                                                                                                                                                                                                                                                                                                                                                                                                                                                                                                                                                                                                                                                                                                                                                                                                                                                                                                                                                                                                                                                                                                                                                                                                                                                                                                                                                                                                                                                                                                                                                                                                                                                                                                                                                                                                                                                                                                                                                                                                                                                                                                                                                                                                                                                                                                                                                                                                                                                                                                                                                                                                                                                                                                                                                                                                                                                                                                                                                                                                                                                                                                                                                                                                                                                                                                                                                                                                                                                                                                                                                                                                                                                                                                                                                                                                                                                                                                                                                                                                                                                                                                                                                                                                                                                                                                                                                                                                                                                                                                                                                                                                                                                                                                                                                                                                                                                                                                                                                                                                    |
| EPI_ISI_476821 | hCoV-19/Singapore/487/2020         | Asia / Singapore                 | 2020-03-26 | Department of Laboratory Medicine<br>Tan Tock Seng Hospital | Department of Laboratory Medicine<br>Tan Tock Seng Hospital | Chen YYY, Zair X, L. C., Tang WY, Maurer-Stroh S, Barkham TMS, Nagarajan N<br>Sessions OM                                                                                                                                                                                                                                                                                                                                                                                                                                                                                                                                                                                                                                                                                                                                                                                                                                                                                                                                                                                                                                                                                                                                                                                                                                                                                                                                                                                                                                                                                                                                                                                                                                                                                                                                                                                                                                                                                                                                                                                                                                                                                                                                                                                                                                                                                                                                                                                                                                                                                                                                                                                                                                                                                                                                                                                                                                                                                                                                                                                                                                                                                                                                                                                                                                                                                                                                                                                                                                                                                                                                                                                                                                                                                                                                                                                                                                                                                                                                                                                                                                                                                                                                                                                                                                                                                                                                                                                                                                                                                                                                                                                                                                                                                                                                                                                                                                                                                                                                                                                                                                                                                                                                                                                                                                                                                                                                                                                                                                                                                                                                                                                                                                                                                                                                                                                                                                                                                                                                                                                                                                                                                                                                                                                                                                                                                                                                                                                                                                                                                                                                                                                                                                                                                                                                                                                                                                                                                                                                                                                                                                                                                                                                                                                                                                                                                                                                                                    |
| EPI_ISI_476832 | hCoV-19/Turkey/KOC42/M2/2020       | Asia / Turkey / Kocaeli          | 2020-04-27 | Medical Biology Department, Kocaeli University              | Medical Genetics Department, Kocaeli University             | Savik I, C. N. Sumetti-Akaykulu D., Eren-Keskis S, Ilgazi A, Ahan S, Karan A, Kadi M, Sayim M, Aspinar G, Canturk N                                                                                                                                                                                                                                                                                                                                                                                                                                                                                                                                                                                                                                                                                                                                                                                                                                                                                                                                                                                                                                                                                                                                                                                                                                                                                                                                                                                                                                                                                                                                                                                                                                                                                                                                                                                                                                                                                                                                                                                                                                                                                                                                                                                                                                                                                                                                                                                                                                                                                                                                                                                                                                                                                                                                                                                                                                                                                                                                                                                                                                                                                                                                                                                                                                                                                                                                                                                                                                                                                                                                                                                                                                                                                                                                                                                                                                                                                                                                                                                                                                                                                                                                                                                                                                                                                                                                                                                                                                                                                                                                                                                                                                                                                                                                                                                                                                                                                                                                                                                                                                                                                                                                                                                                                                                                                                                                                                                                                                                                                                                                                                                                                                                                                                                                                                                                                                                                                                                                                                                                                                                                                                                                                                                                                                                                                                                                                                                                                                                                                                                                                                                                                                                                                                                                                                                                                                                                                                                                                                                                                                                                                                                                                                                                                                                                                                                                          |
| EPI_ISI_476835 | hCoV-19/Greece/ATH_3/2020          | Europe / Greece / Thessaloniki   | 2020-03-04 | National Influenza Centre for Northern Greece               | National Influenza Centre for Northern Greece               | Maria Christofidou                                                                                                                                                                                                                                                                                                                                                                                                                                                                                                                                                                                                                                                                                                                                                                                                                                                                                                                                                                                                                                                                                                                                                                                                                                                                                                                                                                                                                                                                                                                                                                                                                                                                                                                                                                                                                                                                                                                                                                                                                                                                                                                                                                                                                                                                                                                                                                                                                                                                                                                                                                                                                                                                                                                                                                                                                                                                                                                                                                                                                                                                                                                                                                                                                                                                                                                                                                                                                                                                                                                                                                                                                                                                                                                                                                                                                                                                                                                                                                                                                                                                                                                                                                                                                                                                                                                                                                                                                                                                                                                                                                                                                                                                                                                                                                                                                                                                                                                                                                                                                                                                                                                                                                                                                                                                                                                                                                                                                                                                                                                                                                                                                                                                                                                                                                                                                                                                                                                                                                                                                                                                                                                                                                                                                                                                                                                                                                                                                                                                                                                                                                                                                                                                                                                                                                                                                                                                                                                                                                                                                                                                                                                                                                                                                                                                                                                                                                                                                                           |
| EPI_ISI_476836 | hCoV-19/Greece/ATH_7/2020          | Europe / Greece / Thessaloniki   | 2020-03-01 | National Influenza Centre for Northern Greece               | National Influenza Centre for Northern Greece               | Maria Christofidou                                                                                                                                                                                                                                                                                                                                                                                                                                                                                                                                                                                                                                                                                                                                                                                                                                                                                                                                                                                                                                                                                                                                                                                                                                                                                                                                                                                                                                                                                                                                                                                                                                                                                                                                                                                                                                                                                                                                                                                                                                                                                                                                                                                                                                                                                                                                                                                                                                                                                                                                                                                                                                                                                                                                                                                                                                                                                                                                                                                                                                                                                                                                                                                                                                                                                                                                                                                                                                                                                                                                                                                                                                                                                                                                                                                                                                                                                                                                                                                                                                                                                                                                                                                                                                                                                                                                                                                                                                                                                                                                                                                                                                                                                                                                                                                                                                                                                                                                                                                                                                                                                                                                                                                                                                                                                                                                                                                                                                                                                                                                                                                                                                                                                                                                                                                                                                                                                                                                                                                                                                                                                                                                                                                                                                                                                                                                                                                                                                                                                                                                                                                                                                                                                                                                                                                                                                                                                                                                                                                                                                                                                                                                                                                                                                                                                                                                                                                                                                           |
| EPI_ISI_476837 | hCoV-19/Greece/ATH_1/2020          | Europe / Greece / Thessaloniki   | 2020-03-05 | National Influenza Centre for Northern Greece               | National Influenza Centre for Northern Greece               | Maria Christofidou                                                                                                                                                                                                                                                                                                                                                                                                                                                                                                                                                                                                                                                                                                                                                                                                                                                                                                                                                                                                                                                                                                                                                                                                                                                                                                                                                                                                                                                                                                                                                                                                                                                                                                                                                                                                                                                                                                                                                                                                                                                                                                                                                                                                                                                                                                                                                                                                                                                                                                                                                                                                                                                                                                                                                                                                                                                                                                                                                                                                                                                                                                                                                                                                                                                                                                                                                                                                                                                                                                                                                                                                                                                                                                                                                                                                                                                                                                                                                                                                                                                                                                                                                                                                                                                                                                                                                                                                                                                                                                                                                                                                                                                                                                                                                                                                                                                                                                                                                                                                                                                                                                                                                                                                                                                                                                                                                                                                                                                                                                                                                                                                                                                                                                                                                                                                                                                                                                                                                                                                                                                                                                                                                                                                                                                                                                                                                                                                                                                                                                                                                                                                                                                                                                                                                                                                                                                                                                                                                                                                                                                                                                                                                                                                                                                                                                                                                                                                                                           |
| EPI_ISI_476838 | hCoV-19/Greece/ATH_3/2020          | Europe / Greece / Thessaloniki   | 2020-03-30 | National Influenza Centre for Northern Greece               | National Influenza Centre for Northern Greece               | Maria Christofidou                                                                                                                                                                                                                                                                                                                                                                                                                                                                                                                                                                                                                                                                                                                                                                                                                                                                                                                                                                                                                                                                                                                                                                                                                                                                                                                                                                                                                                                                                                                                                                                                                                                                                                                                                                                                                                                                                                                                                                                                                                                                                                                                                                                                                                                                                                                                                                                                                                                                                                                                                                                                                                                                                                                                                                                                                                                                                                                                                                                                                                                                                                                                                                                                                                                                                                                                                                                                                                                                                                                                                                                                                                                                                                                                                                                                                                                                                                                                                                                                                                                                                                                                                                                                                                                                                                                                                                                                                                                                                                                                                                                                                                                                                                                                                                                                                                                                                                                                                                                                                                                                                                                                                                                                                                                                                                                                                                                                                                                                                                                                                                                                                                                                                                                                                                                                                                                                                                                                                                                                                                                                                                                                                                                                                                                                                                                                                                                                                                                                                                                                                                                                                                                                                                                                                                                                                                                                                                                                                                                                                                                                                                                                                                                                                                                                                                                                                                                                                                           |
| EPI_ISI_476839 | hCoV-19/Greece/ATH_3/2020          | Europe / Greece / Thessaloniki   | 2020-04-09 | National Influenza Centre for Northern Greece               | National Influenza Centre for Northern Greece               | Maria Christofidou                                                                                                                                                                                                                                                                                                                                                                                                                                                                                                                                                                                                                                                                                                                                                                                                                                                                                                                                                                                                                                                                                                                                                                                                                                                                                                                                                                                                                                                                                                                                                                                                                                                                                                                                                                                                                                                                                                                                                                                                                                                                                                                                                                                                                                                                                                                                                                                                                                                                                                                                                                                                                                                                                                                                                                                                                                                                                                                                                                                                                                                                                                                                                                                                                                                                                                                                                                                                                                                                                                                                                                                                                                                                                                                                                                                                                                                                                                                                                                                                                                                                                                                                                                                                                                                                                                                                                                                                                                                                                                                                                                                                                                                                                                                                                                                                                                                                                                                                                                                                                                                                                                                                                                                                                                                                                                                                                                                                                                                                                                                                                                                                                                                                                                                                                                                                                                                                                                                                                                                                                                                                                                                                                                                                                                                                                                                                                                                                                                                                                                                                                                                                                                                                                                                                                                                                                                                                                                                                                                                                                                                                                                                                                                                                                                                                                                                                                                                                                                           |
| EPI_ISI_476840 | hCoV-19/India/DRDC_530/2020        | Asia / India / Madhya Pradesh    | 2020-04-09 | Defence Research & Development Establishment (DRDE)         | Defence Research & Development Establishment (DRDE)         | Shashi Sharma, Paban Kumar Dash, Sushil Kumar Sharma, Ambuj Shrivastava S, Kumar                                                                                                                                                                                                                                                                                                                                                                                                                                                                                                                                                                                                                                                                                                                                                                                                                                                                                                                                                                                                                                                                                                                                                                                                                                                                                                                                                                                                                                                                                                                                                                                                                                                                                                                                                                                                                                                                                                                                                                                                                                                                                                                                                                                                                                                                                                                                                                                                                                                                                                                                                                                                                                                                                                                                                                                                                                                                                                                                                                                                                                                                                                                                                                                                                                                                                                                                                                                                                                                                                                                                                                                                                                                                                                                                                                                                                                                                                                                                                                                                                                                                                                                                                                                                                                                                                                                                                                                                                                                                                                                                                                                                                                                                                                                                                                                                                                                                                                                                                                                                                                                                                                                                                                                                                                                                                                                                                                                                                                                                                                                                                                                                                                                                                                                                                                                                                                                                                                                                                                                                                                                                                                                                                                                                                                                                                                                                                                                                                                                                                                                                                                                                                                                                                                                                                                                                                                                                                                                                                                                                                                                                                                                                                                                                                                                                                                                                                                             |
| EPI_ISI_476841 | hCoV-19/Greece/Thessaloniki_8/2020 | Europe / Greece / Thessaloniki   | 2020-04-09 | National Influenza Centre for Northern Greece               | National Influenza Centre for Northern Greece               | Maria Christofidou                                                                                                                                                                                                                                                                                                                                                                                                                                                                                                                                                                                                                                                                                                                                                                                                                                                                                                                                                                                                                                                                                                                                                                                                                                                                                                                                                                                                                                                                                                                                                                                                                                                                                                                                                                                                                                                                                                                                                                                                                                                                                                                                                                                                                                                                                                                                                                                                                                                                                                                                                                                                                                                                                                                                                                                                                                                                                                                                                                                                                                                                                                                                                                                                                                                                                                                                                                                                                                                                                                                                                                                                                                                                                                                                                                                                                                                                                                                                                                                                                                                                                                                                                                                                                                                                                                                                                                                                                                                                                                                                                                                                                                                                                                                                                                                                                                                                                                                                                                                                                                                                                                                                                                                                                                                                                                                                                                                                                                                                                                                                                                                                                                                                                                                                                                                                                                                                                                                                                                                                                                                                                                                                                                                                                                                                                                                                                                                                                                                                                                                                                                                                                                                                                                                                                                                                                                                                                                                                                                                                                                                                                                                                                                                                                                                                                                                                                                                                                                           |
| EPI_ISI_476842 | hCoV-19/India/DRDC_474/2020        | Asia / India / Madhya Pradesh    | 2020-05-26 | Defence Research & Development Establishment (DRDE)         | Defence Research & Development Establishment (DRDE)         | Shashi Sharma, Paban Kumar Dash, Sushil Kumar Sharma, Ambuj Shrivastava S, Kumar                                                                                                                                                                                                                                                                                                                                                                                                                                                                                                                                                                                                                                                                                                                                                                                                                                                                                                                                                                                                                                                                                                                                                                                                                                                                                                                                                                                                                                                                                                                                                                                                                                                                                                                                                                                                                                                                                                                                                                                                                                                                                                                                                                                                                                                                                                                                                                                                                                                                                                                                                                                                                                                                                                                                                                                                                                                                                                                                                                                                                                                                                                                                                                                                                                                                                                                                                                                                                                                                                                                                                                                                                                                                                                                                                                                                                                                                                                                                                                                                                                                                                                                                                                                                                                                                                                                                                                                                                                                                                                                                                                                                                                                                                                                                                                                                                                                                                                                                                                                                                                                                                                                                                                                                                                                                                                                                                                                                                                                                                                                                                                                                                                                                                                                                                                                                                                                                                                                                                                                                                                                                                                                                                                                                                                                                                                                                                                                                                                                                                                                                                                                                                                                                                                                                                                                                                                                                                                                                                                                                                                                                                                                                                                                                                                                                                                                                                                             |
| EPI_ISI_476843 | hCoV-19/Greece/ATH_110/2020        | Europe / Greece / Thessaloniki   | 2020-03-09 | National Influenza Centre for Northern Greece               | National Influenza Centre for Northern Greece               | Maria Christofidou                                                                                                                                                                                                                                                                                                                                                                                                                                                                                                                                                                                                                                                                                                                                                                                                                                                                                                                                                                                                                                                                                                                                                                                                                                                                                                                                                                                                                                                                                                                                                                                                                                                                                                                                                                                                                                                                                                                                                                                                                                                                                                                                                                                                                                                                                                                                                                                                                                                                                                                                                                                                                                                                                                                                                                                                                                                                                                                                                                                                                                                                                                                                                                                                                                                                                                                                                                                                                                                                                                                                                                                                                                                                                                                                                                                                                                                                                                                                                                                                                                                                                                                                                                                                                                                                                                                                                                                                                                                                                                                                                                                                                                                                                                                                                                                                                                                                                                                                                                                                                                                                                                                                                                                                                                                                                                                                                                                                                                                                                                                                                                                                                                                                                                                                                                                                                                                                                                                                                                                                                                                                                                                                                                                                                                                                                                                                                                                                                                                                                                                                                                                                                                                                                                                                                                                                                                                                                                                                                                                                                                                                                                                                                                                                                                                                                                                                                                                                                                           |
| EPI_ISI_476844 | hCoV-19/India/DRDC_4001/2020       | Asia / India / Madhya Pradesh    | 2020-05-12 | Defence Research & Development Establishment (DRDE)         | Defence Research & Development Establishment (DRDE)         | Shashi Sharma, Paban Kumar Dash, Sushil Kumar Sharma, Ambuj Shrivastava S, Kumar                                                                                                                                                                                                                                                                                                                                                                                                                                                                                                                                                                                                                                                                                                                                                                                                                                                                                                                                                                                                                                                                                                                                                                                                                                                                                                                                                                                                                                                                                                                                                                                                                                                                                                                                                                                                                                                                                                                                                                                                                                                                                                                                                                                                                                                                                                                                                                                                                                                                                                                                                                                                                                                                                                                                                                                                                                                                                                                                                                                                                                                                                                                                                                                                                                                                                                                                                                                                                                                                                                                                                                                                                                                                                                                                                                                                                                                                                                                                                                                                                                                                                                                                                                                                                                                                                                                                                                                                                                                                                                                                                                                                                                                                                                                                                                                                                                                                                                                                                                                                                                                                                                                                                                                                                                                                                                                                                                                                                                                                                                                                                                                                                                                                                                                                                                                                                                                                                                                                                                                                                                                                                                                                                                                                                                                                                                                                                                                                                                                                                                                                                                                                                                                                                                                                                                                                                                                                                                                                                                                                                                                                                                                                                                                                                                                                                                                                                                             |
| EPI_ISI_476845 | hCoV-19/India/DRDC_NIC_8/2020      | Europe / Greece / Thessaloniki   | 2020-03-13 | National Influenza Centre for Northern Greece               | National Influenza Centre for Northern Greece               | Maria Christofidou                                                                                                                                                                                                                                                                                                                                                                                                                                                                                                                                                                                                                                                                                                                                                                                                                                                                                                                                                                                                                                                                                                                                                                                                                                                                                                                                                                                                                                                                                                                                                                                                                                                                                                                                                                                                                                                                                                                                                                                                                                                                                                                                                                                                                                                                                                                                                                                                                                                                                                                                                                                                                                                                                                                                                                                                                                                                                                                                                                                                                                                                                                                                                                                                                                                                                                                                                                                                                                                                                                                                                                                                                                                                                                                                                                                                                                                                                                                                                                                                                                                                                                                                                                                                                                                                                                                                                                                                                                                                                                                                                                                                                                                                                                                                                                                                                                                                                                                                                                                                                                                                                                                                                                                                                                                                                                                                                                                                                                                                                                                                                                                                                                                                                                                                                                                                                                                                                                                                                                                                                                                                                                                                                                                                                                                                                                                                                                                                                                                                                                                                                                                                                                                                                                                                                                                                                                                                                                                                                                                                                                                                                                                                                                                                                                                                                                                                                                                                                                           |
| EPI_ISI_476846 | hCoV-19/India/DRDC_197/2020        | Asia / India / Madhya Pradesh    | 2020-04-01 | Defence Research & Development Establishment (DRDE)         | Defence Research & Development Establishment (DRDE)         | Shashi Sharma, Paban Kumar Dash, Sushil Kumar Sharma, Ambuj Shrivastava S, Kumar                                                                                                                                                                                                                                                                                                                                                                                                                                                                                                                                                                                                                                                                                                                                                                                                                                                                                                                                                                                                                                                                                                                                                                                                                                                                                                                                                                                                                                                                                                                                                                                                                                                                                                                                                                                                                                                                                                                                                                                                                                                                                                                                                                                                                                                                                                                                                                                                                                                                                                                                                                                                                                                                                                                                                                                                                                                                                                                                                                                                                                                                                                                                                                                                                                                                                                                                                                                                                                                                                                                                                                                                                                                                                                                                                                                                                                                                                                                                                                                                                                                                                                                                                                                                                                                                                                                                                                                                                                                                                                                                                                                                                                                                                                                                                                                                                                                                                                                                                                                                                                                                                                                                                                                                                                                                                                                                                                                                                                                                                                                                                                                                                                                                                                                                                                                                                                                                                                                                                                                                                                                                                                                                                                                                                                                                                                                                                                                                                                                                                                                                                                                                                                                                                                                                                                                                                                                                                                                                                                                                                                                                                                                                                                                                                                                                                                                                                                             |
| EPI_ISI_476847 | hCoV-19/India/DRDC_NIC_50/2020     | Europe / Greece / Thessaloniki   | 2020-04-12 | National Influenza Centre for Northern Greece               | National Influenza Centre for Northern Greece               | Maria Christofidou                                                                                                                                                                                                                                                                                                                                                                                                                                                                                                                                                                                                                                                                                                                                                                                                                                                                                                                                                                                                                                                                                                                                                                                                                                                                                                                                                                                                                                                                                                                                                                                                                                                                                                                                                                                                                                                                                                                                                                                                                                                                                                                                                                                                                                                                                                                                                                                                                                                                                                                                                                                                                                                                                                                                                                                                                                                                                                                                                                                                                                                                                                                                                                                                                                                                                                                                                                                                                                                                                                                                                                                                                                                                                                                                                                                                                                                                                                                                                                                                                                                                                                                                                                                                                                                                                                                                                                                                                                                                                                                                                                                                                                                                                                                                                                                                                                                                                                                                                                                                                                                                                                                                                                                                                                                                                                                                                                                                                                                                                                                                                                                                                                                                                                                                                                                                                                                                                                                                                                                                                                                                                                                                                                                                                                                                                                                                                                                                                                                                                                                                                                                                                                                                                                                                                                                                                                                                                                                                                                                                                                                                                                                                                                                                                                                                                                                                                                                                                                           |
| EPI_ISI_476848 | hCoV-19/India/DRDC_759/2020        | Asia / India / Madhya Pradesh    | 2020-04-11 | Defence Research & Development Establishment (DRDE)         | Defence Research & Development Establishment (DRDE)         | Shashi Sharma, Paban Kumar Dash, Sushil Kumar Sharma, Ambuj Shrivastava S, Kumar                                                                                                                                                                                                                                                                                                                                                                                                                                                                                                                                                                                                                                                                                                                                                                                                                                                                                                                                                                                                                                                                                                                                                                                                                                                                                                                                                                                                                                                                                                                                                                                                                                                                                                                                                                                                                                                                                                                                                                                                                                                                                                                                                                                                                                                                                                                                                                                                                                                                                                                                                                                                                                                                                                                                                                                                                                                                                                                                                                                                                                                                                                                                                                                                                                                                                                                                                                                                                                                                                                                                                                                                                                                                                                                                                                                                                                                                                                                                                                                                                                                                                                                                                                                                                                                                                                                                                                                                                                                                                                                                                                                                                                                                                                                                                                                                                                                                                                                                                                                                                                                                                                                                                                                                                                                                                                                                                                                                                                                                                                                                                                                                                                                                                                                                                                                                                                                                                                                                                                                                                                                                                                                                                                                                                                                                                                                                                                                                                                                                                                                                                                                                                                                                                                                                                                                                                                                                                                                                                                                                                                                                                                                                                                                                                                                                                                                                                                             |
| EPI_ISI_476849 | hCoV-19/India/DRDC_1794/2020       | Asia / India / Madhya Pradesh    | 2020-04-29 | Defence Research & Development Establishment (DRDE)         | Defence Research & Development Establishment (DRDE)         | Shashi Sharma, Paban Kumar Dash, Sushil Kumar Sharma, Ambuj Shrivastava S, Kumar                                                                                                                                                                                                                                                                                                                                                                                                                                                                                                                                                                                                                                                                                                                                                                                                                                                                                                                                                                                                                                                                                                                                                                                                                                                                                                                                                                                                                                                                                                                                                                                                                                                                                                                                                                                                                                                                                                                                                                                                                                                                                                                                                                                                                                                                                                                                                                                                                                                                                                                                                                                                                                                                                                                                                                                                                                                                                                                                                                                                                                                                                                                                                                                                                                                                                                                                                                                                                                                                                                                                                                                                                                                                                                                                                                                                                                                                                                                                                                                                                                                                                                                                                                                                                                                                                                                                                                                                                                                                                                                                                                                                                                                                                                                                                                                                                                                                                                                                                                                                                                                                                                                                                                                                                                                                                                                                                                                                                                                                                                                                                                                                                                                                                                                                                                                                                                                                                                                                                                                                                                                                                                                                                                                                                                                                                                                                                                                                                                                                                                                                                                                                                                                                                                                                                                                                                                                                                                                                                                                                                                                                                                                                                                                                                                                                                                                                                                             |
| EPI_ISI_476850 | hCoV-19/India/DRDC_2429/2020       | Europe / Greece / Thessaloniki   | 2020-05-03 | National Influenza Centre for Northern Greece               | National Influenza Centre for Northern Greece               | Maria Christofidou                                                                                                                                                                                                                                                                                                                                                                                                                                                                                                                                                                                                                                                                                                                                                                                                                                                                                                                                                                                                                                                                                                                                                                                                                                                                                                                                                                                                                                                                                                                                                                                                                                                                                                                                                                                                                                                                                                                                                                                                                                                                                                                                                                                                                                                                                                                                                                                                                                                                                                                                                                                                                                                                                                                                                                                                                                                                                                                                                                                                                                                                                                                                                                                                                                                                                                                                                                                                                                                                                                                                                                                                                                                                                                                                                                                                                                                                                                                                                                                                                                                                                                                                                                                                                                                                                                                                                                                                                                                                                                                                                                                                                                                                                                                                                                                                                                                                                                                                                                                                                                                                                                                                                                                                                                                                                                                                                                                                                                                                                                                                                                                                                                                                                                                                                                                                                                                                                                                                                                                                                                                                                                                                                                                                                                                                                                                                                                                                                                                                                                                                                                                                                                                                                                                                                                                                                                                                                                                                                                                                                                                                                                                                                                                                                                                                                                                                                                                                                                           |
| EPI_ISI_476851 | hCoV-19/Greece/ATH_3/2020          | Europe / Greece / Thessaloniki   | 2020-04-09 | National Influenza Centre for Northern Greece               | National Influenza Centre for Northern Greece               | Maria Christofidou                                                                                                                                                                                                                                                                                                                                                                                                                                                                                                                                                                                                                                                                                                                                                                                                                                                                                                                                                                                                                                                                                                                                                                                                                                                                                                                                                                                                                                                                                                                                                                                                                                                                                                                                                                                                                                                                                                                                                                                                                                                                                                                                                                                                                                                                                                                                                                                                                                                                                                                                                                                                                                                                                                                                                                                                                                                                                                                                                                                                                                                                                                                                                                                                                                                                                                                                                                                                                                                                                                                                                                                                                                                                                                                                                                                                                                                                                                                                                                                                                                                                                                                                                                                                                                                                                                                                                                                                                                                                                                                                                                                                                                                                                                                                                                                                                                                                                                                                                                                                                                                                                                                                                                                                                                                                                                                                                                                                                                                                                                                                                                                                                                                                                                                                                                                                                                                                                                                                                                                                                                                                                                                                                                                                                                                                                                                                                                                                                                                                                                                                                                                                                                                                                                                                                                                                                                                                                                                                                                                                                                                                                                                                                                                                                                                                                                                                                                                                                                           |
| EPI_ISI_476852 | hCoV-19/India/DRDC_2467/2020       | Asia / India / Madhya Pradesh    | 2020-05-04 | Defence Research & Development Establishment (DRDE)         | Defence Research & Development Establishment (DRDE)         | Shashi Sharma, Paban Kumar Dash, Sushil Kumar Sharma, Ambuj Shrivastava S, Kumar                                                                                                                                                                                                                                                                                                                                                                                                                                                                                                                                                                                                                                                                                                                                                                                                                                                                                                                                                                                                                                                                                                                                                                                                                                                                                                                                                                                                                                                                                                                                                                                                                                                                                                                                                                                                                                                                                                                                                                                                                                                                                                                                                                                                                                                                                                                                                                                                                                                                                                                                                                                                                                                                                                                                                                                                                                                                                                                                                                                                                                                                                                                                                                                                                                                                                                                                                                                                                                                                                                                                                                                                                                                                                                                                                                                                                                                                                                                                                                                                                                                                                                                                                                                                                                                                                                                                                                                                                                                                                                                                                                                                                                                                                                                                                                                                                                                                                                                                                                                                                                                                                                                                                                                                                                                                                                                                                                                                                                                                                                                                                                                                                                                                                                                                                                                                                                                                                                                                                                                                                                                                                                                                                                                                                                                                                                                                                                                                                                                                                                                                                                                                                                                                                                                                                                                                                                                                                                                                                                                                                                                                                                                                                                                                                                                                                                                                                                             |
| EPI_ISI_476853 | hCoV-19/India/DRDC_2498/2020       | Asia / India / MP                | 2020-05-04 | Defence Research & Development Establishment (DRDE)         | Defence Research & Development Establishment (DRDE)         | Shashi Sharma, Paban Kumar Dash, Sushil Kumar Sharma, Ambuj Shrivastava S, Kumar                                                                                                                                                                                                                                                                                                                                                                                                                                                                                                                                                                                                                                                                                                                                                                                                                                                                                                                                                                                                                                                                                                                                                                                                                                                                                                                                                                                                                                                                                                                                                                                                                                                                                                                                                                                                                                                                                                                                                                                                                                                                                                                                                                                                                                                                                                                                                                                                                                                                                                                                                                                                                                                                                                                                                                                                                                                                                                                                                                                                                                                                                                                                                                                                                                                                                                                                                                                                                                                                                                                                                                                                                                                                                                                                                                                                                                                                                                                                                                                                                                                                                                                                                                                                                                                                                                                                                                                                                                                                                                                                                                                                                                                                                                                                                                                                                                                                                                                                                                                                                                                                                                                                                                                                                                                                                                                                                                                                                                                                                                                                                                                                                                                                                                                                                                                                                                                                                                                                                                                                                                                                                                                                                                                                                                                                                                                                                                                                                                                                                                                                                                                                                                                                                                                                                                                                                                                                                                                                                                                                                                                                                                                                                                                                                                                                                                                                                                             |
| EPI_ISI_476854 | hCoV-19/India/DRDC_3002/2020       | Asia / India / MP                | 2020-05-11 | Defence Research & Development Establishment (DRDE)         | Defence Research & Development Establishment (DRDE)         | Shashi Sharma, Paban Kumar Dash, Sushil Kumar Sharma, Ambuj Shrivastava S, Kumar                                                                                                                                                                                                                                                                                                                                                                                                                                                                                                                                                                                                                                                                                                                                                                                                                                                                                                                                                                                                                                                                                                                                                                                                                                                                                                                                                                                                                                                                                                                                                                                                                                                                                                                                                                                                                                                                                                                                                                                                                                                                                                                                                                                                                                                                                                                                                                                                                                                                                                                                                                                                                                                                                                                                                                                                                                                                                                                                                                                                                                                                                                                                                                                                                                                                                                                                                                                                                                                                                                                                                                                                                                                                                                                                                                                                                                                                                                                                                                                                                                                                                                                                                                                                                                                                                                                                                                                                                                                                                                                                                                                                                                                                                                                                                                                                                                                                                                                                                                                                                                                                                                                                                                                                                                                                                                                                                                                                                                                                                                                                                                                                                                                                                                                                                                                                                                                                                                                                                                                                                                                                                                                                                                                                                                                                                                                                                                                                                                                                                                                                                                                                                                                                                                                                                                                                                                                                                                                                                                                                                                                                                                                                                                                                                                                                                                                                                                             |
| EPI_ISI_476855 | hCoV-19/India/GBRC22a/2020         | Asia / India / Gujarat / Vadodra | 2020-06-08 | GMERS Medical College & Hospital, Goli, Vadodra             | Gujarat Biotechnology Research Centre                       | Janvi Ravai, Zama Patel, Monika Gandhi, Pinal Trivedi, Maheshi Pandya, Nidhi Patel, Nisha Savaliya, Raghavendra Kumar, Dinesh Kumar, Zuber Sayyed, Komal Patel, Pandya, Atul Anant, Nikha Trivedi, Meenakshi Shah, Neera Doshi, Varsha Godbole, R D Dixit, A M Kadi, Harsh Bakshi, Chhatraya Joshi, Madhu Joshi                                                                                                                                                                                                                                                                                                                                                                                                                                                                                                                                                                                                                                                                                                                                                                                                                                                                                                                                                                                                                                                                                                                                                                                                                                                                                                                                                                                                                                                                                                                                                                                                                                                                                                                                                                                                                                                                                                                                                                                                                                                                                                                                                                                                                                                                                                                                                                                                                                                                                                                                                                                                                                                                                                                                                                                                                                                                                                                                                                                                                                                                                                                                                                                                                                                                                                                                                                                                                                                                                                                                                                                                                                                                                                                                                                                                                                                                                                                                                                                                                                                                                                                                                                                                                                                                                                                                                                                                                                                                                                                                                                                                                                                                                                                                                                                                                                                                                                                                                                                                                                                                                                                                                                                                                                                                                                                                                                                                                                                                                                                                                                                                                                                                                                                                                                                                                                                                                                                                                                                                                                                                                                                                                                                                                                                                                                                                                                                                                                                                                                                                                                                                                                                                                                                                                                                                                                                                                                                                                                                                                                                                                                                                              |
| EPI_ISI_476856 | hCoV-19/India/GBRC22b/2020         | Asia / India / Gujarat / Vadodra | 2020-06-08 | GMERS Medical College & Hospital, Goli, Vadodra             | Gujarat Biotechnology Research Centre                       | Janvi Ravai, Zama Patel, Monika Gandhi, Pinal Trivedi, Maheshi Pandya, Nidhi Patel, Nisha Savaliya, Raghavendra Kumar, Dinesh Kumar, Zuber Sayyed, Komal Patel, Pandya, Atul Anant, Nikha Trivedi, Meenakshi Shah, Neera Doshi, Varsha Godbole, Raghavendra Kumar, Dinesh Kumar, Zuber Sayyed, Komal Patel, Pandya, Atul Anant, Nikha Trivedi, Meenakshi Shah, Neera Doshi, Varsha Godbole, Raghavendra Kumar, Dinesh Kumar, Zuber Sayyed, Komal Patel, Pandya, Atul Anant, Nikha Trivedi, Meenakshi Shah, Neera Doshi, Varsha Godbole, Raghavendra Kumar, Dinesh Kumar, Zuber Sayyed, Komal Patel, Pandya, Atul Anant, Nikha Trivedi, Meenakshi Shah, Neera Doshi, Varsha Godbole, Raghavendra Kumar, Dinesh Kumar, Zuber Sayyed, Komal Patel, Pandya, Atul Anant, Nikha Trivedi, Meenakshi Shah, Neera Doshi, Varsha Godbole, Raghavendra Kumar, Dinesh Kumar, Zuber Sayyed, Komal Patel, Pandya, Atul Anant, Nikha Trivedi, Meenakshi Shah, Neera Doshi, Varsha Godbole, Raghavendra Kumar, Dinesh Kumar, Zuber Sayyed, Komal Patel, Pandya, Atul Anant, Nikha Trivedi, Meenakshi Shah, Neera Doshi, Varsha Godbole, Raghavendra Kumar, Dinesh Kumar, Zuber Sayyed, Komal Patel, Pandya, Atul Anant, Nikha Trivedi, Meenakshi Shah, Neera Doshi, Varsha Godbole, Raghavendra Kumar, Dinesh Kumar, Zuber Sayyed, Komal Patel, Pandya, Atul Anant, Nikha Trivedi, Meenakshi Shah, Neera Doshi, Varsha Godbole, Raghavendra Kumar, Dinesh Kumar, Zuber Sayyed, Komal Patel, Pandya, Atul Anant, Nikha Trivedi, Meenakshi Shah, Neera Doshi, Varsha Godbole, Raghavendra Kumar, Dinesh Kumar, Zuber Sayyed, Komal Patel, Pandya, Atul Anant, Nikha Trivedi, Meenakshi Shah, Neera Doshi, Varsha Godbole, Raghavendra Kumar, Dinesh Kumar, Zuber Sayyed, Komal Patel, Pandya, Atul Anant, Nikha Trivedi, Meenakshi Shah, Neera Doshi, Varsha Godbole, Raghavendra Kumar, Dinesh Kumar, Zuber Sayyed, Komal Patel, Pandya, Atul Anant, Nikha Trivedi, Meenakshi Shah, Neera Doshi, Varsha Godbole, Raghavendra Kumar, Dinesh Kumar, Zuber Sayyed, Komal Patel, Pandya, Atul Anant, Nikha Trivedi, Meenakshi Shah, Neera Doshi, Varsha Godbole, Raghavendra Kumar, Dinesh Kumar, Zuber Sayyed, Komal Patel, Pandya, Atul Anant, Nikha Trivedi, Meenakshi Shah, Neera Doshi, Varsha Godbole, Raghavendra Kumar, Dinesh Kumar, Zuber Sayyed, Komal Patel, Pandya, Atul Anant, Nikha Trivedi, Meenakshi Shah, Neera Doshi, Varsha Godbole, Raghavendra Kumar, Dinesh Kumar, Zuber Sayyed, Komal Patel, Pandya, Atul Anant, Nikha Trivedi, Meenakshi Shah, Neera Doshi, Varsha Godbole, Raghavendra Kumar, Dinesh Kumar, Zuber Sayyed, Komal Patel, Pandya, Atul Anant, Nikha Trivedi, Meenakshi Shah, Neera Doshi, Varsha Godbole, Raghavendra Kumar, Dinesh Kumar, Zuber Sayyed, Komal Patel, Pandya, Atul Anant, Nikha Trivedi, Meenakshi Shah, Neera Doshi, Varsha Godbole, Raghavendra Kumar, Dinesh Kumar, Zuber Sayyed, Komal Patel, Pandya, Atul Anant, Nikha Trivedi, Meenakshi Shah, Neera Doshi, Varsha Godbole, Raghavendra Kumar, Dinesh Kumar, Zuber Sayyed, Komal Patel, Pandya, Atul Anant, Nikha Trivedi, Meenakshi Shah, Neera Doshi, Varsha Godbole, Raghavendra Kumar, Dinesh Kumar, Zuber Sayyed, Komal Patel, Pandya, Atul Anant, Nikha Trivedi, Meenakshi Shah, Neera Doshi, Varsha Godbole, Raghavendra Kumar, Dinesh Kumar, Zuber Sayyed, Komal Patel, Pandya, Atul Anant, Nikha Trivedi, Meenakshi Shah, Neera Doshi, Varsha Godbole, Raghavendra Kumar, Dinesh Kumar, Zuber Sayyed, Komal Patel, Pandya, Atul Anant, Nikha Trivedi, Meenakshi Shah, Neera Doshi, Varsha Godbole, Raghavendra Kumar, Dinesh Kumar, Zuber Sayyed, Komal Patel, Pandya, Atul Anant, Nikha Trivedi, Meenakshi Shah, Neera Doshi, Varsha Godbole, Raghavendra Kumar, Dinesh Kumar, Zuber Sayyed, Komal Patel, Pandya, Atul Anant, Nikha Trivedi, Meenakshi Shah, Neera Doshi, Varsha Godbole, Raghavendra Kumar, Dinesh Kumar, Zuber Sayyed, Komal Patel, Pandya, Atul Anant, Nikha Trivedi, Meenakshi Shah, Neera Doshi, Varsha Godbole, Raghavendra Kumar, Dinesh Kumar, Zuber Sayyed, Komal Patel, Pandya, Atul Anant, Nikha Trivedi, Meenakshi Shah, Neera Doshi, Varsha Godbole, Raghavendra Kumar, Dinesh Kumar, Zuber Sayyed, Komal Patel, Pandya, Atul Anant, Nikha Trivedi, Meenakshi Shah, Neera Doshi, Varsha Godbole, Raghavendra Kumar, Dinesh Kumar, Zuber Sayyed, Komal Patel, Pandya, Atul Anant, Nikha Trivedi, Meenakshi Shah, Neera Doshi, Varsha Godbole, Raghavendra Kumar, Dinesh Kumar, Zuber Sayyed, Komal Patel, Pandya, Atul Anant, Nikha Trivedi, Meenakshi Shah, Neera Doshi, Varsha Godbole, Raghavendra Kumar, Dinesh Kumar, Zuber Sayyed, Komal Patel, Pandya, Atul Anant, Nikha Trivedi, Meenakshi Shah, Neera Doshi, Varsha Godbole, Raghavendra Kumar, Dinesh Kumar, Zuber Sayyed, Komal Patel, Pandya, Atul Anant, Nikha Trivedi, Meenakshi Shah, Neera Doshi, Varsha Godbole, Raghavendra Kumar, Dinesh Kumar, Zuber Sayyed, Komal Patel, Pandya, Atul Anant, Nikha Trivedi, Meenakshi Shah, Neera Doshi, Varsha Godbole, Raghavendra Kumar, Dinesh Kumar, Zuber Sayyed, Komal Patel, Pandya, Atul Anant, Nikha Trivedi, Meenakshi Shah, Neera Doshi, Varsha Godbole, Raghavendra Kumar, Dinesh Kumar, Zuber Sayyed, Komal Patel, Pandya, Atul Anant, Nikha Trivedi, Meenakshi Shah, Neera Doshi, Varsha Godbole, Raghavendra Kumar, Dinesh Kumar, Zuber Sayyed, Komal Patel, Pandya, Atul Anant, Nikha Trivedi, Meenakshi Shah, Neera Doshi, Varsha Godbole, Raghavendra Kumar, Dinesh Kumar, Zuber Sayyed, Komal Patel, Pandya, Atul Anant, Nikha Trivedi, Meenakshi Shah, Neera Doshi, Varsha Godbole, Raghavendra Kumar, Dinesh Kumar, Zuber Sayyed, Komal Patel, Pandya, Atul Anant, Nikha Trivedi, Meenakshi Shah, Neera Doshi, Varsha Godbole, Raghavendra Kumar, Dinesh Kumar, Zuber Sayyed, Komal Patel, Pandya, Atul Anant, Nikha Trivedi, Meenakshi Shah, Neera Doshi, Varsha Godbole, Raghavendra Kumar, Dinesh Kumar, Zuber Sayyed, Komal Patel, Pandya, Atul Anant, Nikha Trivedi, Meenakshi Shah, Neera Doshi, Varsha Godbole, Raghavendra Kumar, Dinesh Kumar, Zuber Sayyed, Komal Patel, Pandya, Atul Anant, Nikha Trivedi, Meenakshi Shah, Neera Doshi, Varsha Godbole, Raghavendra Kumar, Dinesh Kumar, Zuber Sayyed, Komal Patel, Pandya, Atul Anant, Nikha Trivedi, Meenakshi Shah, Neera Doshi, Varsha Godbole, Raghavendra Kumar, Dinesh Kumar, Zuber Sayyed, Komal Patel, Pandya, Atul Anant, Nikha Trivedi, Meenakshi Shah, Neera Doshi, Varsha Godbole, Raghavendra Kumar, Dinesh Kumar, Zuber Sayyed, Komal Patel, Pandya, Atul Anant, Nikha Trivedi, Meenakshi Shah, Neera Doshi, Varsha Godbole, Raghavendra Kumar, Dinesh Kumar, Zuber Sayyed, Komal Patel, Pandya, Atul Anant, Nikha Trivedi, Meenakshi Shah, Neera Doshi, Varsha Godbole, Raghavendra Kumar, Dinesh Kumar, Zuber Sayyed, Komal Patel, Pandya, Atul Anant, Nikha Trivedi, Meenakshi Shah, Neera Doshi, Varsha Godbole, Raghavendra Kumar, Dinesh Kumar, Zuber Sayyed, Komal Patel, Pandya, Atul Anant, Nikha Trivedi, Meenakshi Shah, Neera Doshi, Varsha Godbole, Raghavendra Kumar, Dinesh Kumar, Zuber Sayyed, Komal Patel, Pandya, Atul Anant, Nikha Trivedi, Meenakshi Shah, Neera Doshi, Varsha Godbole, Raghavendra Kumar, Dinesh Kumar, Zuber Sayyed, Komal Patel, Pandya, Atul Anant, Nikha Trivedi, Meenakshi Shah, Neera Doshi, Varsha Godbole, Raghavendra Kumar, Dinesh Kumar, Zuber Sayyed, Komal Patel, Pand |

|                |                                        |                                                      |                                                               |                                                                                                                                |                                                                                                                                |                                                                                                                                                                                                                                                                                                                                                                                                                                                                                                                                                                                                          |
|----------------|----------------------------------------|------------------------------------------------------|---------------------------------------------------------------|--------------------------------------------------------------------------------------------------------------------------------|--------------------------------------------------------------------------------------------------------------------------------|----------------------------------------------------------------------------------------------------------------------------------------------------------------------------------------------------------------------------------------------------------------------------------------------------------------------------------------------------------------------------------------------------------------------------------------------------------------------------------------------------------------------------------------------------------------------------------------------------------|
| EPI_ISL_476875 | hCoV-19/India/GBRCC233a/2020           | Asia / India / Gujarat / Surat                       | 2020-06-12                                                    | Department of Microbiology, Government Medical College, Surat                                                                  | Gujarat Biotechnology Research Centre                                                                                          | Zama Patel, Monika Gandhi, Pinal Trivedi, Mahanah Pandya, Nidhi Patel, Nalin Savaliya, Raghavendra Kumar, Dinesh Kumar, Zuber Sayyed, Komal Patel, Labhji Pandya, Atfal Ansari, Nikha Trivedi, Nareesh Chauhan, Summaya Mullan, Amit gamit, Apuravsinh Puvur, Janvi Ravai, R D Dixit, A M Kadi, Harsh Bakshi, Chaitanya Joshi, Madhvi Joshi                                                                                                                                                                                                                                                              |
| EPI_ISL_476876 | hCoV-19/India/GBRCC235a/2020           | Asia / India / Gujarat / Surat                       | 2020-06-12                                                    | Department of Microbiology, Government Medical College, Surat                                                                  | Gujarat Biotechnology Research Centre                                                                                          | Pinal Trivedi, Mahanah Pandya, Nidhi Patel, Nalin Savaliya, Raghavendra Kumar, Dinesh Kumar, Zuber Sayyed, Komal Patel, Labhji Pandya, Atfal Ansari, Nikha Trivedi, Nareesh Chauhan, Summaya Mullan, Amit gamit, Apuravsinh Puvur, Janvi Ravai, Zama Patel, Monika Gandhi, R D Dixit, A M Kadi, Harsh Bakshi, Chaitanya Joshi, Madhvi Joshi                                                                                                                                                                                                                                                              |
| EPI_ISL_476877 | hCoV-19/India/GBRCC235b/2020           | Asia / India / Gujarat / Surat                       | 2020-06-12                                                    | Department of Microbiology, Government Medical College, Surat                                                                  | Gujarat Biotechnology Research Centre                                                                                          | Mahanah Pandya, Nidhi Patel, Nalin Savaliya, Raghavendra Kumar, Dinesh Kumar, Zuber Sayyed, Komal Patel, Labhji Pandya, Atfal Ansari, Nikha Trivedi, Nareesh Chauhan, Summaya Mullan, Amit gamit, Apuravsinh Puvur, Janvi Ravai, Zama Patel, Monika Gandhi, Pinal Trivedi, R D Dixit, A M Kadi, Harsh Bakshi, Chaitanya Joshi, Madhvi Joshi                                                                                                                                                                                                                                                              |
| EPI_ISL_476878 | hCoV-19/India/GBRCC236/2020            | Asia / India / Gujarat / Surat                       | 2020-06-12                                                    | Department of Microbiology, Government Medical College, Surat                                                                  | Gujarat Biotechnology Research Centre                                                                                          | Nidhi Patel, Nalin Savaliya, Raghavendra Kumar, Dinesh Kumar, Zuber Sayyed, Komal Patel, Labhji Pandya, Atfal Ansari, Nikha Trivedi, Nareesh Chauhan, Summaya Mullan, Amit gamit, Apuravsinh Puvur, Janvi Ravai, Zama Patel, Monika Gandhi, Pinal Trivedi, Mahanah Pandya, Nidhi Patel, Nalin Savaliya, Raghavendra Kumar, R D Dixit, A M Kadi, Harsh Bakshi, Chaitanya Joshi, Madhvi Joshi                                                                                                                                                                                                              |
| EPI_ISL_476879 | hCoV-19/India/GBRCC237a/2020           | Asia / India / Gujarat / Bardoli                     | 2020-06-12                                                    | Department of Microbiology, Government Medical College, Surat                                                                  | Gujarat Biotechnology Research Centre                                                                                          | Nitin Savaliya, Raghavendra Kumar, Dinesh Kumar, Zuber Sayyed, Komal Patel, Labhji Pandya, Atfal Ansari, Nikha Trivedi, Nareesh Chauhan, Summaya Mullan, Amit gamit, Apuravsinh Puvur, Janvi Ravai, Zama Patel, Monika Gandhi, Pinal Trivedi, Mahanah Pandya, Nidhi Patel, Nalin Savaliya, Raghavendra Kumar, Nidhi Patel, R D Dixit, A M Kadi, Harsh Bakshi, Chaitanya Joshi, Madhvi Joshi                                                                                                                                                                                                              |
| EPI_ISL_476880 | hCoV-19/India/GBRCC237b/2020           | Asia / India / Gujarat / Bardoli                     | 2020-06-12                                                    | Department of Microbiology, Government Medical College, Surat                                                                  | Gujarat Biotechnology Research Centre                                                                                          | Raghavendra Kumar, Dinesh Kumar, Zuber Sayyed, Komal Patel, Labhji Pandya, Atfal Ansari, Nikha Trivedi, Nareesh Chauhan, Summaya Mullan, Amit gamit, Apuravsinh Puvur, Janvi Ravai, Zama Patel, Monika Gandhi, Pinal Trivedi, Mahanah Pandya, Nidhi Patel, Nalin Savaliya, Raghavendra Kumar, Nidhi Patel, R D Dixit, A M Kadi, Harsh Bakshi, Chaitanya Joshi, Madhvi Joshi                                                                                                                                                                                                                              |
| EPI_ISL_476881 | hCoV-19/India/GBRCC238a/2020           | Asia / India / Gujarat / Choryasi                    | 2020-06-12                                                    | Department of Microbiology, Government Medical College, Surat                                                                  | Gujarat Biotechnology Research Centre                                                                                          | Zuber Sayyed, Komal Patel, Labhji Pandya, Atfal Ansari, Nikha Trivedi, Nareesh Chauhan, Summaya Mullan, Amit gamit, Apuravsinh Puvur, Janvi Ravai, Zama Patel, Monika Gandhi, Pinal Trivedi, Mahanah Pandya, Nidhi Patel, Nalin Savaliya, Raghavendra Kumar, Dinesh Kumar, Zuber Sayyed, Komal Patel, Labhji Pandya, Atfal Ansari, Nikha Trivedi, Nareesh Chauhan, Summaya Mullan, Amit gamit, Apuravsinh Puvur, Janvi Ravai, Zama Patel, Monika Gandhi, Pinal Trivedi, Mahanah Pandya, Nidhi Patel, Nalin Savaliya, Raghavendra Kumar, R D Dixit, A M Kadi, Harsh Bakshi, Chaitanya Joshi, Madhvi Joshi |
| EPI_ISL_476882 | hCoV-19/India/DRDE_38b/2020            | Asia / India / Gujarat / Choryasi                    | 2020-06-12                                                    | Department of Microbiology, Government Medical College, Surat                                                                  | Gujarat Biotechnology Research Centre                                                                                          | Zuber Sayyed, Komal Patel, Labhji Pandya, Atfal Ansari, Nikha Trivedi, Nareesh Chauhan, Summaya Mullan, Amit gamit, Apuravsinh Puvur, Janvi Ravai, Zama Patel, Monika Gandhi, Pinal Trivedi, Mahanah Pandya, Nidhi Patel, Nalin Savaliya, Raghavendra Kumar, Dinesh Kumar, Zuber Sayyed, Komal Patel, Labhji Pandya, Atfal Ansari, Nikha Trivedi, Nareesh Chauhan, Summaya Mullan, Amit gamit, Apuravsinh Puvur, Janvi Ravai, Zama Patel, Monika Gandhi, Pinal Trivedi, Mahanah Pandya, Nidhi Patel, Nalin Savaliya, Raghavendra Kumar, R D Dixit, A M Kadi, Harsh Bakshi, Chaitanya Joshi, Madhvi Joshi |
| EPI_ISL_476883 | hCoV-19/India/DRDE_39a/2020            | Asia / India / MP                                    | 2020-05-13                                                    | Defence Research & Development Establishment (DRDE)                                                                            | Defence Research & Development Establishment (DRDE)                                                                            | S. Kumar                                                                                                                                                                                                                                                                                                                                                                                                                                                                                                                                                                                                 |
| EPI_ISL_476884 | hCoV-19/India/DRDE_39b/2020            | Asia / India / MP                                    | 2020-05-16                                                    | Defence Research & Development Establishment (DRDE)                                                                            | Defence Research & Development Establishment (DRDE)                                                                            | S. Kumar                                                                                                                                                                                                                                                                                                                                                                                                                                                                                                                                                                                                 |
| EPI_ISL_476885 | hCoV-19/India/DRDE_40b/2020            | Asia / India / MP                                    | 2020-05-17                                                    | Defence Research & Development Establishment (DRDE)                                                                            | Defence Research & Development Establishment (DRDE)                                                                            | S. Kumar                                                                                                                                                                                                                                                                                                                                                                                                                                                                                                                                                                                                 |
| EPI_ISL_476886 | hCoV-19/India/DRDE_40c/2020            | Asia / India / MP                                    | 2020-05-17                                                    | Defence Research & Development Establishment (DRDE)                                                                            | Defence Research & Development Establishment (DRDE)                                                                            | S. Kumar                                                                                                                                                                                                                                                                                                                                                                                                                                                                                                                                                                                                 |
| EPI_ISL_476887 | hCoV-19/India/DRDE_40d/2020            | Asia / India / MP                                    | 2020-05-17                                                    | Defence Research & Development Establishment (DRDE)                                                                            | Defence Research & Development Establishment (DRDE)                                                                            | S. Kumar                                                                                                                                                                                                                                                                                                                                                                                                                                                                                                                                                                                                 |
| EPI_ISL_476888 | hCoV-19/India/DRDE_39c/2020            | Asia / India / MP                                    | 2020-05-16                                                    | Defence Research & Development Establishment (DRDE)                                                                            | Defence Research & Development Establishment (DRDE)                                                                            | S. Kumar                                                                                                                                                                                                                                                                                                                                                                                                                                                                                                                                                                                                 |
| EPI_ISL_476889 | hCoV-19/India/DRDE_39d/2020            | Asia / India / MP                                    | 2020-05-16                                                    | Defence Research & Development Establishment (DRDE)                                                                            | Defence Research & Development Establishment (DRDE)                                                                            | S. Kumar                                                                                                                                                                                                                                                                                                                                                                                                                                                                                                                                                                                                 |
| EPI_ISL_476890 | hCoV-19/India/DRDE_40e/2020            | Asia / India / MP                                    | 2020-05-16                                                    | Defence Research & Development Establishment (DRDE)                                                                            | Defence Research & Development Establishment (DRDE)                                                                            | S. Kumar                                                                                                                                                                                                                                                                                                                                                                                                                                                                                                                                                                                                 |
| EPI_ISL_476891 | hCoV-19/India/DRDE_40f/2020            | Asia / India / MP                                    | 2020-05-17                                                    | Defence Research & Development Establishment (DRDE)                                                                            | Defence Research & Development Establishment (DRDE)                                                                            | S. Kumar                                                                                                                                                                                                                                                                                                                                                                                                                                                                                                                                                                                                 |
| EPI_ISL_476892 | hCoV-19/India/DRDE_41a/2020            | Asia / India / MP                                    | 2020-05-17                                                    | Defence Research & Development Establishment (DRDE)                                                                            | Defence Research & Development Establishment (DRDE)                                                                            | S. Kumar                                                                                                                                                                                                                                                                                                                                                                                                                                                                                                                                                                                                 |
| EPI_ISL_476893 | hCoV-19/India/DRDE_41b/2020            | Asia / India / MP                                    | 2020-05-17                                                    | Defence Research & Development Establishment (DRDE)                                                                            | Defence Research & Development Establishment (DRDE)                                                                            | S. Kumar                                                                                                                                                                                                                                                                                                                                                                                                                                                                                                                                                                                                 |
| EPI_ISL_476894 | hCoV-19/India/DRDE_41c/2020            | Asia / India / MP                                    | 2020-05-18                                                    | Defence Research & Development Establishment (DRDE)                                                                            | Defence Research & Development Establishment (DRDE)                                                                            | S. Kumar                                                                                                                                                                                                                                                                                                                                                                                                                                                                                                                                                                                                 |
| EPI_ISL_476895 | hCoV-19/India/DRDE_46/2020             | Asia / India / MP                                    | 2020-05-27                                                    | Defence Research & Development Establishment (DRDE)                                                                            | Defence Research & Development Establishment (DRDE)                                                                            | S. Kumar                                                                                                                                                                                                                                                                                                                                                                                                                                                                                                                                                                                                 |
| EPI_ISL_476896 | hCoV-19/India/DRDE_46a/2020            | Asia / India / MP                                    | 2020-05-25                                                    | Defence Research & Development Establishment (DRDE)                                                                            | Defence Research & Development Establishment (DRDE)                                                                            | S. Kumar                                                                                                                                                                                                                                                                                                                                                                                                                                                                                                                                                                                                 |
| EPI_ISL_476897 | hCoV-19/USA/SC-PR6493/2020             | North America / USA / South Carolina / R2020-05-21   | University of South Carolina Functional Genomics Core         | University of South Carolina Functional Genomics Core                                                                          | Michael Shitman                                                                                                                |                                                                                                                                                                                                                                                                                                                                                                                                                                                                                                                                                                                                          |
| EPI_ISL_408511 | hCoV-19/enWuhan/VDC-HBF13/2020         | Asia / China / Hubei / Wuhan                         | 2020-01-01                                                    | Institute of Viral Disease Control and Prevention, China CDC                                                                   | Institute of Viral Disease Control and Prevention, China CDC                                                                   | William J. Liu, Peipei Liu, Xiang Zhao, Peihua Nu, Yingze Zhao, Wenwen Lei, Ziqian Xu, Bewei Ye, Welling Shi, Roujian Lu, Wenjie Tan, Zhixiao Chen, Yuchao Wu, Juan Song, Dayan Wang, Jun Han, Wenbo Xu, George F. Gao, Guizhen Wu                                                                                                                                                                                                                                                                                                                                                                       |
| EPI_ISL_408512 | hCoV-19/enWuhan/VDC-HBF54/2020         | Asia / China / Hubei / Wuhan                         | 2020-01-01                                                    | Institute of Viral Disease Control and Prevention, China CDC                                                                   | Institute of Viral Disease Control and Prevention, China CDC                                                                   | William J. Liu, Peipei Liu, Xiang Zhao, Peihua Nu, Yingze Zhao, Wenwen Lei, Ziqian Xu, Bewei Ye, Welling Shi, Roujian Lu, Wenjie Tan, Zhixiao Chen, Yuchao Wu, Juan Song, Dayan Wang, Jun Han, Wenbo Xu, George F. Gao, Guizhen Wu                                                                                                                                                                                                                                                                                                                                                                       |
| EPI_ISL_408513 | hCoV-19/enWuhan/VDC-HB65/2020          | Asia / China / Hubei / Wuhan                         | 2020-01-01                                                    | Institute of Viral Disease Control and Prevention, China CDC                                                                   | Institute of Viral Disease Control and Prevention, China CDC                                                                   | William J. Liu, Peipei Liu, Xiang Zhao, Peihua Nu, Yingze Zhao, Wenwen Lei, Ziqian Xu, Bewei Ye, Welling Shi, Roujian Lu, Wenjie Tan, Zhixiao Chen, Yuchao Wu, Juan Song, Dayan Wang, Jun Han, Wenbo Xu, George F. Gao, Guizhen Wu                                                                                                                                                                                                                                                                                                                                                                       |
| EPI_ISL_408514 | hCoV-19/enWuhan/VDC-HBF13-20/2020      | Asia / China / Hubei / Wuhan                         | 2020-01-01                                                    | Institute of Viral Disease Control and Prevention, China CDC                                                                   | Institute of Viral Disease Control and Prevention, China CDC                                                                   | William J. Liu, Peipei Liu, Xiang Zhao, Peihua Nu, Yingze Zhao, Wenwen Lei, Ziqian Xu, Bewei Ye, Welling Shi, Roujian Lu, Wenjie Tan, Zhixiao Chen, Yuchao Wu, Juan Song, Dayan Wang, Jun Han, Wenbo Xu, George F. Gao, Guizhen Wu                                                                                                                                                                                                                                                                                                                                                                       |
| EPI_ISL_408515 | hCoV-19/enWuhan/VDC-HBF13-21/2020      | Asia / China / Hubei / Wuhan                         | 2020-01-01                                                    | Institute of Viral Disease Control and Prevention, China CDC                                                                   | Institute of Viral Disease Control and Prevention, China CDC                                                                   | William J. Liu, Peipei Liu, Xiang Zhao, Peihua Nu, Yingze Zhao, Wenwen Lei, Ziqian Xu, Bewei Ye, Welling Shi, Roujian Lu, Wenjie Tan, Zhixiao Chen, Yuchao Wu, Juan Song, Dayan Wang, Jun Han, Wenbo Xu, George F. Gao, Guizhen Wu                                                                                                                                                                                                                                                                                                                                                                       |
| EPI_ISL_411218 | hCoV-19/France/IDF0571/2020            | Europe / France / Ile-de-France / Paris              | 2020-02-02                                                    | Department of Infectious and Tropical Diseases, Bichat Claude Bernard Hospital, Paris                                          | Laboratoire Virpath, CIRI U111, UCBL1, INSERM, CNRS, ENS                                                                       | Olivier Tournier, Aurélien Traversier, Julien Fournet, Yaxian Yazdanbakhsh, Xavier Lecœur, Catherine Legras-Lachuer, Alexandre Gaymard, Bruno Lina, Manuel Rosa-Calabrera                                                                                                                                                                                                                                                                                                                                                                                                                                |
| EPI_ISL_411219 | hCoV-19/France/IDF0386-wP/2020         | Europe / France / Ile-de-France / Paris              | 2020-01-28                                                    | Department of Infectious and Tropical Diseases, Bichat Claude Bernard Hospital, Paris                                          | Laboratoire Virpath, CIRI U111, UCBL1, INSERM, CNRS, ENS                                                                       | Alexandre Gaymard, Bruno Lina, Manuel Rosa-Calabrera                                                                                                                                                                                                                                                                                                                                                                                                                                                                                                                                                     |
| EPI_ISL_411220 | hCoV-19/France/IDF0386-wP/2020         | Europe / France / Ile-de-France / Paris              | 2020-01-28                                                    | Department of Infectious and Tropical Diseases, Bichat Claude Bernard Hospital, Paris                                          | Laboratoire Virpath, CIRI U111, UCBL1, INSERM, CNRS, ENS                                                                       | Olivier Tournier, Aurélien Traversier, Julien Fournet, Yaxian Yazdanbakhsh, Xavier Lecœur, Catherine Legras-Lachuer, Alexandre Gaymard, Bruno Lina, Manuel Rosa-Calabrera                                                                                                                                                                                                                                                                                                                                                                                                                                |
| EPI_ISL_413016 | hCoV-19/Brazil/SP/2020                 | South America / Brazil / Sao Paulo / Sao             | 2020-02-28                                                    | Hospital Israelita Albert Einstein                                                                                             | Instituto Adolfo Lutz, Interdisciplinary Procedures Center, Strategic Laboratory                                               | Jaqueline Góes de Jesus, Claudio Tavares Sacchi, Fabiana Cristina Pereira dos Santos, Ingra Moraes Cordeiro, Flávia Cristina da Silva Sales, Claudia Regina Gonçalves, Jothão Cid, Maria do Carmo Sampaio, Tereza Timenahy, Nicholas James Loman                                                                                                                                                                                                                                                                                                                                                         |
| EPI_ISL_414372 | hCoV-19/Iran/Qom/25754/2020            | Asia / Iran / Qom                                    | 2020-02-17                                                    | Iran National Influenza Center                                                                                                 | Iran National Influenza Center                                                                                                 | Andreas Rambaut, Ester Cerdasa Salbino, Nuno Rodrigues Faria                                                                                                                                                                                                                                                                                                                                                                                                                                                                                                                                             |
| EPI_ISL_414373 | hCoV-19/Iran/Qom/25754/2020            | Asia / Iran / Qom                                    | 2020-02-16                                                    | Iran National Influenza Center                                                                                                 | Iran National Influenza Center                                                                                                 | Ala Yavarani, Nazarin Zahra Shafiei Jandaghi, Karim Shafiei, Fatemeh Ajaninejad, Fatemeh Saadmandad and Talat Mokhtari Aard                                                                                                                                                                                                                                                                                                                                                                                                                                                                              |
| EPI_ISL_414375 | hCoV-19/Indonesia/NHRD0651/2020        | Asia / Indonesia / Depok                             | 2020-03-01                                                    | National Institute of Health Research and Development                                                                          | National Institute of Health Research and Development                                                                          | Kavet Salegh, Ala Yavarani, Nazarin Zahra Shafiei Jandaghi, Ahmad Nejat, Najmeh Panahpour, Soad Chahresh and Talat Mokhtari Aard                                                                                                                                                                                                                                                                                                                                                                                                                                                                         |
| EPI_ISL_414376 | hCoV-19/Indonesia/NHRD0655/2020        | Asia / Indonesia / Jakarta                           | 2020-03-01                                                    | National Institute of Health Research and Development                                                                          | National Institute of Health Research and Development                                                                          | Sellawaty V. Subangiti, Puspa KD, Irawati HD, Nugraha, AA, Susilanti, NK, Agustiningih, Ramadhany R, Pratiwi E, Hariastuti, NI, Kurniawati, J, Pawesti, HA, Siwantoro                                                                                                                                                                                                                                                                                                                                                                                                                                    |
| EPI_ISL_414377 | hCoV-19/Indonesia/NHRD0651-2/2020      | Asia / Indonesia / Jakarta                           | 2020-03-01                                                    | National Institute of Health Research and Development                                                                          | National Institute of Health Research and Development                                                                          | Sellawaty V. Subangiti, Puspa KD, Irawati HD, Nugraha, AA, Susilanti, NK, Agustiningih, Ramadhany R, Pratiwi E, Hariastuti, NI, Kurniawati, J, Pawesti, HA, Siwantoro                                                                                                                                                                                                                                                                                                                                                                                                                                    |
| EPI_ISL_415641 | hCoV-19/Georgia/TB1-54/2020            | Asia / Georgia / Tbilisi                             | 2020-02-27                                                    | R. G. Lugal Center for Public Health Research, National Center for Disease Control and Public Health (NCDC) of Georgia.        | R. G. Lugal Center for Public Health Research, National Center for Disease Control and Public Health (NCDC) of Georgia.        | Nato Kolariya, Marine Murkhalvashvili, Ann Machabishvili, Lela Sabadze, Mari Gavashelidze, Ana Papkauri, Meri Pantelashvili, Gvantsa Brachvili, Tata Imadze, Tamar Jashvashvili, Tea Teyvdoradze, Ketevan Sidamondze, Ekaterine Khmaladze, Ekaterine Zghentli, Roena Sukhishvili, Marian Zakalashvili, Lela Ushachidze, Magda Dgebuadze, Giorgi Tomashvili, Davit Taguria, Ekaterine Zangaladze, Nino Berishvili, Gvantsa Chanturia, Adam Kotlorashvili, Maia Akhazashvili, Ana Burjanadze, Anna Karadzhe, Khutuna Zakhashvili, Paata Imradze, Amiram Gamkrelidze                                        |
| EPI_ISL_415642 | hCoV-19/Georgia/TB1-477/2020           | Asia / Georgia / Tbilisi                             | 2020-03-10                                                    | R. G. Lugal Center for Public Health Research, National Center for Disease Control and Public Health (NCDC) of Georgia.        | R. G. Lugal Center for Public Health Research, National Center for Disease Control and Public Health (NCDC) of Georgia.        | Nato Kolariya, Marine Murkhalvashvili, Ann Machabishvili, Lela Sabadze, Mari Gavashelidze, Ana Papkauri, Meri Pantelashvili, Gvantsa Brachvili, Tata Imadze, Tamar Jashvashvili, Tea Teyvdoradze, Ketevan Sidamondze, Ekaterine Khmaladze, Ekaterine Zghentli, Roena Sukhishvili, Marian Zakalashvili, Lela Ushachidze, Magda Dgebuadze, Giorgi Tomashvili, Davit Taguria, Ekaterine Zangaladze, Nino Berishvili, Gvantsa Chanturia, Adam Kotlorashvili, Maia Akhazashvili, Ana Burjanadze, Anna Karadzhe, Khutuna Zakhashvili, Paata Imradze, Amiram Gamkrelidze                                        |
| EPI_ISL_415643 | hCoV-19/Georgia/TB1-468/2020           | Asia / Georgia / Tbilisi                             | 2020-03-10                                                    | R. G. Lugal Center for Public Health Research, National Center for Disease Control and Public Health (NCDC) of Georgia.        | R. G. Lugal Center for Public Health Research, National Center for Disease Control and Public Health (NCDC) of Georgia.        | Nato Kolariya, Marine Murkhalvashvili, Ann Machabishvili, Lela Sabadze, Mari Gavashelidze, Ana Papkauri, Meri Pantelashvili, Gvantsa Brachvili, Tata Imadze, Tamar Jashvashvili, Tea Teyvdoradze, Ketevan Sidamondze, Ekaterine Khmaladze, Ekaterine Zghentli, Roena Sukhishvili, Marian Zakalashvili, Lela Ushachidze, Magda Dgebuadze, Giorgi Tomashvili, Davit Taguria, Ekaterine Zangaladze, Nino Berishvili, Gvantsa Chanturia, Adam Kotlorashvili, Maia Akhazashvili, Ana Burjanadze, Anna Karadzhe, Khutuna Zakhashvili, Paata Imradze, Amiram Gamkrelidze                                        |
| EPI_ISL_415644 | hCoV-19/Georgia/TB1-823/2020           | Asia / Georgia / Tbilisi                             | 2020-02-28                                                    | R. G. Lugal Center for Public Health Research, National Center for Disease Control and Public Health (NCDC) of Georgia.        | R. G. Lugal Center for Public Health Research, National Center for Disease Control and Public Health (NCDC) of Georgia.        | Nato Kolariya, Marine Murkhalvashvili, Ann Machabishvili, Lela Sabadze, Mari Gavashelidze, Ana Papkauri, Meri Pantelashvili, Gvantsa Brachvili, Tata Imadze, Tamar Jashvashvili, Tea Teyvdoradze, Ketevan Sidamondze, Ekaterine Khmaladze, Ekaterine Zghentli, Roena Sukhishvili, Marian Zakalashvili, Lela Ushachidze, Magda Dgebuadze, Giorgi Tomashvili, Davit Taguria, Ekaterine Zangaladze, Nino Berishvili, Gvantsa Chanturia, Adam Kotlorashvili, Maia Akhazashvili, Ana Burjanadze, Anna Karadzhe, Khutuna Zakhashvili, Paata Imradze, Amiram Gamkrelidze                                        |
| EPI_ISL_415649 | hCoV-19/France/HF2039/2020             | Europe / France / Hauts-de-France / Creil/2020-03-05 | unknown                                                       | National Reference Center for Viruses of Respiratory Infections, Institut Pasteur, Paris                                       | National Reference Center for Viruses of Respiratory Infections, Institut Pasteur, Paris                                       | Méline Albert, Marion Barbet, Sylvie Behilli, Méline Bizard, Angèle Briesbrère, Flora Donati Vincent Enouf, Maud Varpenepe, Sylvie van der Werf, Christine Bignon                                                                                                                                                                                                                                                                                                                                                                                                                                        |
| EPI_ISL_415650 | hCoV-19/France/HF2039/2020             | Europe / France / IDF                                | 2020-03-02                                                    | Hôpital Instruction des Armées - BÉGIN                                                                                         | National Reference Center for Viruses of Respiratory Infections, Institut Pasteur, Paris                                       | Méline Albert, Marion Barbet, Sylvie Behilli, Méline Bizard, Angèle Briesbrère, Flora Donati Vincent Enouf, Maud Varpenepe, Sylvie van der Werf, Christine Bignon                                                                                                                                                                                                                                                                                                                                                                                                                                        |
| EPI_ISL_415651 | hCoV-19/France/BFC-Co2020-03-05        | Europe / France / Bourgogne-France-Co2020-03-05      | unknown                                                       | National Reference Center for Viruses of Respiratory Infections, Institut Pasteur, Paris                                       | National Reference Center for Viruses of Respiratory Infections, Institut Pasteur, Paris                                       | Méline Albert, Marion Barbet, Sylvie Behilli, Méline Bizard, Angèle Briesbrère, Flora Donati Vincent Enouf, Maud Varpenepe, Sylvie van der Werf, Christine Bignon                                                                                                                                                                                                                                                                                                                                                                                                                                        |
| EPI_ISL_415652 | hCoV-19/France/BFC-Co2147/2020         | Europe / France / Bourgogne-France-Co2020-03-05      | unknown                                                       | National Reference Center for Viruses of Respiratory Infections, Institut Pasteur, Paris                                       | National Reference Center for Viruses of Respiratory Infections, Institut Pasteur, Paris                                       | Méline Albert, Marion Barbet, Sylvie Behilli, Méline Bizard, Angèle Briesbrère, Flora Donati Vincent Enouf, Maud Varpenepe, Sylvie van der Werf, Christine Bignon                                                                                                                                                                                                                                                                                                                                                                                                                                        |
| EPI_ISL_415653 | hCoV-19/France/HF2151/2020             | Europe / France / Hauts de France / Con/2020-03-08   | Centre Hospitalier Compiègne Laboratoire de Biologie          | National Reference Center for Viruses of Respiratory Infections, Institut Pasteur, Paris                                       | National Reference Center for Viruses of Respiratory Infections, Institut Pasteur, Paris                                       | Méline Albert, Marion Barbet, Sylvie Behilli, Méline Bizard, Angèle Briesbrère, Flora Donati Vincent Enouf, Maud Varpenepe, Sylvie van der Werf, Christine Bignon                                                                                                                                                                                                                                                                                                                                                                                                                                        |
| EPI_ISL_415654 | hCoV-19/France/HF2174/2020             | Europe / France / Hauts de France / Con/2020-03-09   | Centre Hospitalier Compiègne Laboratoire de Biologie          | National Reference Center for Viruses of Respiratory Infections, Institut Pasteur, Paris                                       | National Reference Center for Viruses of Respiratory Infections, Institut Pasteur, Paris                                       | Méline Albert, Marion Barbet, Sylvie Behilli, Méline Bizard, Angèle Briesbrère, Flora Donati Vincent Enouf, Maud Varpenepe, Sylvie van der Werf, Christine Bignon                                                                                                                                                                                                                                                                                                                                                                                                                                        |
| EPI_ISL_416142 | hCoV-19/Denmark/SSI-01/2020            | Europe / Denmark / Copenhagen                        | 2020-02-26                                                    | Department of Virus and Microbiological Special diagnostics, Statens Serum Institut, Copenhagen, Denmark.                      | Statens Serum Institut                                                                                                         | Morten Rasmussen, Maken Worsøe Rosenstjerne, Anders Fomsgaard                                                                                                                                                                                                                                                                                                                                                                                                                                                                                                                                            |
| EPI_ISL_416143 | hCoV-19/Denmark/SSI-02/2020            | Europe / Denmark / Copenhagen                        | 2020-02-28                                                    | Department of Virus and Microbiological Special diagnostics, Statens Serum Institut, Copenhagen, Denmark.                      | VIFU                                                                                                                           | Morten Rasmussen, Maken Worsøe Rosenstjerne, Anders Fomsgaard                                                                                                                                                                                                                                                                                                                                                                                                                                                                                                                                            |
| EPI_ISL_416144 | hCoV-19/Denmark/SSI-03/2020            | Europe / Denmark / Copenhagen                        | 2020-03-01                                                    | Department of Virus and Microbiological Special diagnostics, Statens Serum Institut, Copenhagen, Denmark.                      | VIFU                                                                                                                           | Morten Rasmussen, Maken Worsøe Rosenstjerne, Anders Fomsgaard                                                                                                                                                                                                                                                                                                                                                                                                                                                                                                                                            |
| EPI_ISL_416907 | hCoV-19/Malaysia/MKK-CL-2020-7554/2020 | Asia / Malaysia / Selangor                           | 2020-02-06                                                    | National Public Health Laboratory                                                                                              | Malaysia Genome Institute                                                                                                      | Mohd Norazman, Maken Worsøe Rosenstjerne, Anders Fomsgaard                                                                                                                                                                                                                                                                                                                                                                                                                                                                                                                                               |
| EPI_ISL_416994 | hCoV-19/Spain/CastillaLeón/201437/2020 | Europe / Spain / Castilla y León                     | 2020-03-04                                                    | COMPLEJO ASISTENCIAL UNIVERSITARIO DE BURGOS                                                                                   | Instituto de Salud Carlos III                                                                                                  | Mohd Norazman, Maken Worsøe Rosenstjerne, Anders Fomsgaard                                                                                                                                                                                                                                                                                                                                                                                                                                                                                                                                               |
| EPI_ISL_417482 | hCoV-19/Ecuador/HEE-01/2020            | South America / Ecuador / Quito                      | 2020-03-09                                                    | Instituto de Microbiología, Universidad San Francisco de Quito                                                                 | Instituto de Microbiología, Universidad San Francisco de Quito                                                                 | Mohd Norazman, Maken Worsøe Rosenstjerne, Anders Fomsgaard                                                                                                                                                                                                                                                                                                                                                                                                                                                                                                                                               |
| EPI_ISL_427683 | hCoV-19/Australia/NSW148/2020          | Oceania / Australia / New South Wales / 2020-03-23   | Centre for Infectious Diseases and Microbiology Public Health | NSW Health Pathology - Institute of Clinical Pathology and Medical Research, Westmead Hospital, University of Sydney           | NSW Health Pathology - Institute of Clinical Pathology and Medical Research, Westmead Hospital, University of Sydney           | Mohd Norazman, Maken Worsøe Rosenstjerne, Anders Fomsgaard                                                                                                                                                                                                                                                                                                                                                                                                                                                                                                                                               |
| EPI_ISL_430440 | hCoV-19/Malaysia/IMR_WVC1170/2020      | Asia / Malaysia                                      | 2020-03-05                                                    | Institute for Medical Research, Infectious Disease Research Centre, National Institutes of Health, Ministry of Health Malaysia | Institute for Medical Research, Infectious Disease Research Centre, National Institutes of Health, Ministry of Health Malaysia | Mohd Norazman, Maken Worsøe Rosenstjerne, Anders Fomsgaard                                                                                                                                                                                                                                                                                                                                                                                                                                                                                                                                               |
| EPI_ISL_430441 | hCoV-19/Malaysia/IMR_WVC1097/2020      | Asia / Malaysia                                      | 2020-02-29                                                    | Institute for Medical Research, Infectious Disease Research Centre, National Institutes of Health, Ministry of Health Malaysia | Institute for Medical Research, Infectious Disease Research Centre, National Institutes of Health, Ministry of Health Malaysia | Mohd Norazman, Maken Worsøe Rosenstjerne, Anders Fomsgaard                                                                                                                                                                                                                                                                                                                                                                                                                                                                                                                                               |
| EPI_ISL_430442 | hCoV-19/Malaysia/IMR_WVC1098/2020      | Asia / Malaysia                                      | 2020-02-29                                                    | Institute for Medical Research, Infectious Disease Research Centre, National Institutes of Health, Ministry of Health Malaysia | Institute for Medical Research, Infectious Disease Research Centre, National Institutes of Health, Ministry of Health Malaysia | Mohd Norazman, Maken Worsøe Rosenstjerne, Anders Fomsgaard                                                                                                                                                                                                                                                                                                                                                                                                                                                                                                                                               |



Page PAGE]



Page PAGE]

|                |                                      |                              |      |                                                                                           |                                                                                           |                                                                                 |
|----------------|--------------------------------------|------------------------------|------|-------------------------------------------------------------------------------------------|-------------------------------------------------------------------------------------------|---------------------------------------------------------------------------------|
| EPI_ISL_468153 | hCoV-19/Romania/Bucuresti-14545/2020 | Europe / Romania / Bucuresti | 2020 | [Romania, Bucharest] National Institute for Infectious Diseases<br>"Prof. Dr. Matei Balg" | [Romania, Bucharest] National Institute for Infectious Diseases<br>"Prof. Dr. Matei Balg" | Leontina Banica, Marius Colic, Corina Casangu, Marius Surleac, Simona Paraschiv |
| EPI_ISL_468154 | hCoV-19/Romania/Bucuresti-14658/2020 | Europe / Romania / Bucuresti | 2020 | [Romania, Bucharest] National Institute for Infectious Diseases<br>"Prof. Dr. Matei Balg" | [Romania, Bucharest] National Institute for Infectious Diseases<br>"Prof. Dr. Matei Balg" | Leontina Banica, Marius Colic, Corina Casangu, Marius Surleac, Simona Paraschiv |
| EPI_ISL_468155 | hCoV-19/Romania/Bucuresti-15503/2020 | Europe / Romania / Bucuresti | 2020 | [Romania, Bucharest] National Institute for Infectious Diseases<br>"Prof. Dr. Matei Balg" | [Romania, Bucharest] National Institute for Infectious Diseases<br>"Prof. Dr. Matei Balg" | Leontina Banica, Marius Colic, Corina Casangu, Marius Surleac, Simona Paraschiv |
| EPI_ISL_468156 | hCoV-19/Romania/Moveni-24095/2020    | Europe / Romania / Moveni    | 2020 | [Romania, Bucharest] National Institute for Infectious Diseases<br>"Prof. Dr. Matei Balg" | [Romania, Bucharest] National Institute for Infectious Diseases<br>"Prof. Dr. Matei Balg" | Leontina Banica, Marius Colic, Corina Casangu, Marius Surleac, Simona Paraschiv |
| EPI_ISL_468157 | hCoV-19/Romania/Suceava-31645/2020   | Europe / Romania / Suceava   | 2020 | [Romania, Bucharest] National Institute for Infectious Diseases<br>"Prof. Dr. Matei Balg" | [Romania, Bucharest] National Institute for Infectious Diseases<br>"Prof. Dr. Matei Balg" | Leontina Banica, Marius Colic, Corina Casangu, Marius Surleac, Simona Paraschiv |
| EPI_ISL_468158 | hCoV-19/Romania/Suceava-31646/2020   | Europe / Romania / Suceava   | 2020 | [Romania, Bucharest] National Institute for Infectious Diseases<br>"Prof. Dr. Matei Balg" | [Romania, Bucharest] National Institute for Infectious Diseases<br>"Prof. Dr. Matei Balg" | Leontina Banica, Marius Colic, Corina Casangu, Marius Surleac, Simona Paraschiv |
